# Supplementary material for: Brown adipocytes local response to thyroid hormone is required for adaptive thermogenesis in adult male mice
Source: eLife. 2022 Nov 14;11:e81996. doi: 10.7554/eLife.81996 (PMC9683793; doi:10.7554/eLife.81996)
Supplement: Figure 2—source data 1. [file elife-81996-fig2-data1.xlsx]

## Sheet: Instructions
Basemean : mean expression of each transcript across conditions, in reads per million
log2FC : log2 fold-changes of each kinetics point vs PTU mice
padj : adjusted p-value
Status : U = upregulated, D = upregulated, N = not regulated
To be considered regulated, a gene must have a basemean >=10, log2FC > 0.6 or < - 0.6 and padj < 0.05
Status overall : concatenation of each status
GS-TR ChIPseq PEAK : "YES" means the presence of a TRBS within 30kb of the gene
Number of peaks : number of different TRBS within 30kb of the same gene. Positions of these genes are indicated in the next columns

## Sheet: Gene expression following TH 
Gene	baseMean_TH_3h.vs.PTU	log2FoldChange_TH_3h.vs.PTU	padj_TH_3h.vs.PTU	Status 3h	log2FoldChange_TH_6h.vs.PTU	padj_TH_6h.vs.PTU	Status 6h	log2FoldChange_TH_12h.vs.PTU	padj_TH_12h.vs.PTU	Status 12h	log2FoldChange_TH_24h.vs.PTU	padj_TH_24h.vs.PTU	Status 24h	Status overall	GS-TR ChIPseq PEAK	Number of peaks	Positions of the peaks from TSS	Positions of the peaks from TSS	Positions of the peaks from TSS	Positions of the peaks from TSS	Positions of the peaks from TSS	Positions of the peaks from TSS
Dolpp1	66.9278	-0.83491	0.00015659	D	-0.734423	0.000584975	D	-0.830722	0.000134402	D	-0.920995	8.73e-06	D	DDDD	YES	3	-10538	17525	23233
Dhrs3	660.892	-0.949586	8.3e-08	D	-1.90946	6.97e-32	D	-2.00116	1.78e-34	D	-1.10773	2.58e-11	D	DDDD	YES	2	-931	8774
Steap4	1709.43	-0.770838	0.0487619	D	-0.754317	0.0319516	D	-0.847624	0.0125492	D	-0.856398	0.00980995	D	DDDD	YES	1	12053
Bcar3	73.3501	-0.711031	0.0124347	D	-0.990591	7.24e-05	D	-1.03898	3.85e-05	D	-1.41373	5.18e-09	D	DDDD	YES	1	13170
Hmgcs1	1174.84	-0.801457	1.23e-05	D	-1.32114	1.43e-15	D	-1.07498	1.32e-10	D	-1.0834	6.75e-11	D	DDDD	YES	1	22843
Gja1	2490.47	-0.731319	3.72e-05	D	-1.50305	4.31e-22	D	-2.04241	1.08e-40	D	-1.68591	4.29e-28	D	DDDD	YES	1	27000
Zfp697	47.5751	-1.00808	0.000318773	D	-1.07368	5.09e-05	D	-1.46035	6.59e-08	D	-2.05848	2.95e-14	D	DDDD	YES	1	28601
Lrrc58	868.779	-0.848855	0.00100564	D	-1.32981	4.16e-09	D	-0.99685	1.88e-05	D	-0.959473	3.33e-05	D	DDDD	YES	1	-13657
Slc25a25	63.2485	-1.6027	0.000541676	D	-1.96729	4.13e-06	D	-2.44364	8.89e-09	D	-1.79738	2.04e-05	D	DDDD	YES	1	-18633
Fgfbp3	22.1361	-1.43212	0.00105285	D	-0.852155	0.0492422	D	-0.951974	0.0309327	D	-1.42569	0.000454137	D	DDDD	YES	1	-6110
Gm37310	12.0396	-2.77357	6.21e-05	D	-1.77469	0.00668039	D	-2.0611	0.00201482	D	-2.54403	8.69e-05	D	DDDD
4930458D05Rik	12.2397	-1.49895	0.00144525	D	-1.66619	0.000177382	D	-3.04964	5.64e-08	D	-3.10012	4.46e-09	D	DDDD
Gm454	13.1286	-1.42245	0.00754849	D	-1.17835	0.0181784	D	-2.16058	3.89e-05	D	-5.01211	1.36e-08	D	DDDD
Lrrc17	13.5083	-1.11088	0.0167316	D	-0.982281	0.0218758	D	-1.59741	0.000464786	D	-1.56682	0.000233058	D	DDDD
D430020J02Rik	14.9886	-1.43027	0.000354808	D	-1.89167	1.04e-06	D	-3.64293	6.44e-11	D	-3.14064	1.27e-11	D	DDDD
Cadps2	17.5409	-0.878698	0.0289908	D	-1.26045	0.000500104	D	-0.771798	0.0495249	D	-1.29372	0.000325225	D	DDDD
Bmp3	18.0899	-0.96838	0.0177839	D	-0.997532	0.00744055	D	-1.40992	0.000303306	D	-2.01731	2.17e-07	D	DDDD
Fam110b	18.4343	-1.2769	0.00526161	D	-1.628	0.000125681	D	-1.28222	0.00366831	D	-0.915912	0.0331709	D	DDDD
Sycp2	21.9054	-1.53293	0.000753681	D	-1.33284	0.00207862	D	-1.45442	0.000992225	D	-2.56741	9.08e-09	D	DDDD
Fgfr2	22.8469	-1.62948	5.77e-05	D	-3.01297	6.4e-13	D	-3.17585	2.74e-12	D	-2.29009	5.16e-09	D	DDDD
Ammecr1	24.545	-1.03992	0.00275513	D	-1.24216	0.000132591	D	-0.761914	0.0300357	D	-0.662182	0.0483796	D	DDDD
Strip2	24.9959	-1.27035	0.00409601	D	-0.924387	0.0306584	D	-1.94053	4.58e-06	D	-1.74778	1.39e-05	D	DDDD
Ablim2	27.0712	-0.843936	0.0352177	D	-1.38922	6.96e-05	D	-1.29796	0.000341034	D	-0.99085	0.00449777	D	DDDD
Atp10a	27.3286	-0.979141	0.0366351	D	-0.98852	0.0192346	D	-1.48821	0.000373551	D	-1.37002	0.000637069	D	DDDD
Stbd1	29.1511	-0.711734	0.0275617	D	-1.19494	2.54e-05	D	-1.43013	2.04e-06	D	-1.2183	1.55e-05	D	DDDD
9330159F19Rik	29.8626	-2.00563	4.11e-05	D	-1.50303	0.00169684	D	-2.96919	2.12e-09	D	-1.80668	8.98e-05	D	DDDD
Mir99ahg	30.4589	-0.791354	0.0449907	D	-0.825453	0.0196699	D	-0.745646	0.0459699	D	-1.02453	0.0025856	D	DDDD
Rwdd3	32.1666	-1.2678	0.00207668	D	-1.69543	7.53e-06	D	-1.82998	2.39e-06	D	-1.58643	2.17e-05	D	DDDD
Gm10687	32.1738	-0.988772	0.00773034	D	-1.11815	0.000936253	D	-2.3957	5.18e-11	D	-2.06678	9.11e-10	D	DDDD
Lhfpl2	32.5245	-0.951773	0.00526161	D	-2.20686	3.18e-12	D	-2.89309	3.1e-15	D	-1.65365	6.05e-08	D	DDDD
Btbd8	36.3586	-1.09256	0.00395496	D	-1.10996	0.00160725	D	-1.12901	0.00166098	D	-1.16881	0.000667762	D	DDDD
Gm15411	37.0988	-0.681619	0.0404353	D	-0.675826	0.0245525	D	-1.59969	6.81e-08	D	-3.47524	2.64e-20	D	DDDD
BC052040	37.234	-0.893518	0.00295028	D	-1.4017	3.87e-07	D	-1.09419	0.000137723	D	-1.07207	8.94e-05	D	DDDD
Glis3	38.2315	-1.72167	0.000127012	D	-1.72195	5.97e-05	D	-1.82301	2.45e-05	D	-1.45372	0.000628336	D	DDDD
Magee1	38.2609	-0.753053	0.026197	D	-0.879551	0.00354485	D	-0.706355	0.0282889	D	-0.702336	0.0212495	D	DDDD
Sgms2	38.282	-1.09362	0.00435816	D	-1.47821	2.02e-05	D	-2.7007	1.1e-12	D	-1.32679	0.000105281	D	DDDD
Pdgfc	40.0708	-1.44486	1.78e-05	D	-1.03172	0.00181625	D	-0.897495	0.00911489	D	-0.857763	0.00965913	D	DDDD
Mfsd9	42.3686	-0.925892	0.000427869	D	-0.963199	0.000108792	D	-1.38082	1.06e-07	D	-1.08172	1.04e-05	D	DDDD
Kcnk2	43.0128	-1.07611	0.000595592	D	-1.36374	2.73e-06	D	-2.23533	5.21e-13	D	-2.78402	1.22e-18	D	DDDD
Eepd1	44.0784	-1.17415	0.000311005	D	-0.66936	0.0439002	D	-0.782576	0.0185089	D	-0.830312	0.00820075	D	DDDD
Hcar2	44.8163	-2.45994	7.21e-07	D	-2.97641	5.45e-10	D	-2.81802	5.7e-09	D	-3.07937	1.04e-10	D	DDDD
Plagl1	45.8269	-0.778697	0.0210489	D	-1.07782	0.00026713	D	-1.25907	2.67e-05	D	-1.33299	3.75e-06	D	DDDD
Lrtm1	46.7353	-1.70938	0.000581259	D	-1.49801	0.00165014	D	-1.99324	1.77e-05	D	-1.86808	3.93e-05	D	DDDD
Zxdb	49.1112	-0.79411	0.0275155	D	-0.944825	0.00293024	D	-0.907758	0.00535736	D	-1.02698	0.000882983	D	DDDD
Nav3	51.7059	-1.19261	3.89e-05	D	-0.917763	0.00127614	D	-1.46799	2.23e-07	D	-1.21964	8.4e-06	D	DDDD
Slc43a1	52.5497	-1.15727	0.000331618	D	-0.87254	0.00587936	D	-1.134	0.000274652	D	-1.68157	1.68e-08	D	DDDD
Pik3r3	53.2197	-1.018	0.000147187	D	-0.879576	0.000700896	D	-0.760853	0.00496577	D	-0.906867	0.000359637	D	DDDD
Pard6g	55.9167	-0.978109	2.11e-05	D	-0.878751	8.29e-05	D	-0.716108	0.00228237	D	-1.10024	5.1e-07	D	DDDD
Tgif1	56.3924	-0.630358	0.0286949	D	-1.0804	1.12e-05	D	-1.15518	4.87e-06	D	-0.839165	0.000662704	D	DDDD
Gm9776	56.6842	-0.772789	0.0104198	D	-0.720695	0.00982308	D	-0.696194	0.0157349	D	-1.01304	0.000123858	D	DDDD
Mest	57.0292	-0.883185	0.00633625	D	-1.47926	2.19e-07	D	-1.38853	2.03e-06	D	-0.917886	0.00160257	D	DDDD
Chsy1	59.4444	-1.35044	7.75e-05	D	-1.12173	0.000757831	D	-0.736453	0.041817	D	-0.941682	0.00463197	D	DDDD
Mc5r	60.0783	-1.49275	6.75e-05	D	-1.55486	1.32e-05	D	-1.81424	3.29e-07	D	-2.54119	4.74e-13	D	DDDD
Rab32	64.4184	-0.825087	0.00122371	D	-1.40912	1.25e-09	D	-1.48001	7.24e-10	D	-0.964671	3.3e-05	D	DDDD
Gm37305	65.2267	-0.764509	0.0451681	D	-1.54696	7.21e-07	D	-1.88851	2.12e-09	D	-2.20372	1.19e-12	D	DDDD
Armcx1	74.309	-1.01978	0.000123397	D	-1.43121	6.82e-09	D	-1.61561	1.71e-10	D	-1.12354	5.39e-06	D	DDDD
P2ry2	76.4104	-1.14105	0.000770097	D	-0.777569	0.022101	D	-1.11113	0.000574885	D	-1.82184	2.32e-09	D	DDDD
Rasa2	83.5843	-0.610283	0.00310215	D	-0.725392	0.00012261	D	-0.820498	2.11e-05	D	-0.749863	5.4e-05	D	DDDD
Klf11	90.5423	-1.21498	4.29e-06	D	-1.36401	6.04e-08	D	-1.52127	2.16e-09	D	-1.39205	2.12e-08	D	DDDD
Fsd2	91.6361	-0.875778	0.0268858	D	-0.906789	0.010556	D	-0.990394	0.00475712	D	-0.904014	0.00892352	D	DDDD
Trps1	96.9582	-1.54183	9e-14	D	-0.956297	4.08e-06	D	-1.00011	1.97e-06	D	-0.750043	0.000326611	D	DDDD
Anp32-ps	99.723	-0.619197	0.0496747	D	-1.06608	4.37e-05	D	-0.852766	0.00160173	D	-0.606634	0.0284324	D	DDDD
Tceal1	99.9562	-0.629553	0.00624561	D	-1.57443	2.41e-15	D	-1.82874	1.66e-18	D	-1.0885	3.58e-08	D	DDDD
Sucnr1	100.206	-1.91335	3.4e-06	D	-1.63522	5.3e-05	D	-1.96391	6.28e-07	D	-2.42555	2.79e-10	D	DDDD
Dmrt2	100.643	-1.01063	0.00016616	D	-1.14215	5.69e-06	D	-1.51103	1.44e-09	D	-1.59437	6.39e-11	D	DDDD
Prlr	106.755	-0.956508	7.33e-05	D	-0.802032	0.000680305	D	-1.30997	7.94e-09	D	-1.98634	1.04e-18	D	DDDD
Napepld	108.4	-1.44766	2.18e-10	D	-1.71676	1.32e-14	D	-1.44367	1.81e-10	D	-1.12735	4.53e-07	D	DDDD
Elp4	111.427	-0.934306	3.19e-05	D	-1.02338	1.67e-06	D	-0.949047	1.31e-05	D	-0.608159	0.00637894	D	DDDD
Ankrd44	125.356	-0.689517	0.00318684	D	-1.07378	1.85e-07	D	-1.0285	8.92e-07	D	-1.25463	5.52e-10	D	DDDD
Irs3	130.582	-0.947783	0.0174779	D	-0.946277	0.00900227	D	-1.34726	8.18e-05	D	-1.11953	0.0010921	D	DDDD
Btg1	130.72	-1.18289	1.32e-06	D	-1.36107	5.38e-09	D	-1.41306	1.77e-09	D	-1.33296	7.65e-09	D	DDDD
Mcam	131.21	-1.06749	5.35e-08	D	-1.68495	2.85e-19	D	-2.25368	1.15e-29	D	-1.43058	1.86e-14	D	DDDD
Stk39	132.013	-0.700489	0.00848751	D	-0.964732	3.59e-05	D	-0.818456	0.000634062	D	-1.33569	2.31e-09	D	DDDD
Enpep	133.384	-0.803125	0.000691041	D	-1.23584	5.53e-09	D	-1.81903	2.42e-17	D	-1.69587	5.1e-16	D	DDDD
Zmym3	138.983	-0.688039	0.00226474	D	-0.956915	2.12e-06	D	-1.01195	6.09e-07	D	-0.942711	2.08e-06	D	DDDD
Dapk1	144.687	-1.31763	1.5e-07	D	-2.51391	7.14e-26	D	-2.80103	1.46e-29	D	-1.35403	1.38e-08	D	DDDD
Gpat3	146.811	-1.51479	1.83e-07	D	-1.89808	5.68e-12	D	-2.97643	2.69e-26	D	-4.27124	3.57e-46	D	DDDD
Hspa12a	163.068	-0.924403	0.0109033	D	-0.873382	0.00905548	D	-1.49599	1.17e-06	D	-1.46672	1.31e-06	D	DDDD
Zfp395	166.185	-1.02981	2.13e-05	D	-1.61294	4.53e-13	D	-1.50681	2.09e-11	D	-2.09805	3.11e-21	D	DDDD
Pik3cb	178.277	-1.03484	2.42e-08	D	-1.0928	1.1e-09	D	-0.854015	3.79e-06	D	-1.00008	2e-08	D	DDDD
Sema6d	180.954	-0.991859	2.25e-07	D	-1.42222	5.27e-15	D	-1.47972	1.15e-15	D	-0.673913	0.000405079	D	DDDD
Tab3	181.971	-0.839511	3.56e-08	D	-0.937321	1.79e-10	D	-1.34007	4.47e-19	D	-0.979241	1.76e-11	D	DDDD
Hacl1	182.401	-0.805364	0.0181194	D	-1.41243	6.71e-07	D	-0.931425	0.00193057	D	-1.37862	8.02e-07	D	DDDD
Six1	186.962	-0.964468	0.0191627	D	-1.21919	0.000682676	D	-1.21103	0.000684501	D	-1.34165	9.63e-05	D	DDDD
Bhlhb9	190.137	-0.858087	0.0142595	D	-1.28627	1.66e-05	D	-1.89032	3.98e-11	D	-3.00498	5.01e-26	D	DDDD
Ankrd50	196.384	-0.913161	0.000253504	D	-1.51429	1.36e-11	D	-1.36464	1.66e-09	D	-0.731243	0.00216045	D	DDDD
Lnx2	198.282	-0.735646	0.00130671	D	-1.11842	3.63e-08	D	-0.989066	1.63e-06	D	-0.697471	0.000933764	D	DDDD
C130074G19Rik	202.325	-0.881131	5.83e-05	D	-1.27668	2.3e-10	D	-1.54714	1.63e-14	D	-0.859915	2.88e-05	D	DDDD
Pigp	211.286	-0.665406	0.0437105	D	-0.707527	0.0155937	D	-0.631393	0.0356317	D	-1.33405	2.94e-07	D	DDDD
Sesn3	214.43	-0.617454	0.00076016	D	-1.09848	1.28e-11	D	-0.765415	5.72e-06	D	-1.01921	2.76e-10	D	DDDD
B430010I23Rik	216.457	-0.77782	0.00854545	D	-1.06449	3.69e-05	D	-1.16201	4.49e-06	D	-2.07643	9.61e-18	D	DDDD
Arxes1	221.415	-1.00829	0.0116831	D	-0.994004	0.00658228	D	-0.781462	0.0422676	D	-2.57163	1.93e-15	D	DDDD
Abca8a	229.279	-0.777458	6.96e-06	D	-0.910469	2.39e-08	D	-0.728988	1.48e-05	D	-0.935444	6.07e-09	D	DDDD
Kansl1l	238.018	-0.731572	0.000869236	D	-0.625088	0.00318565	D	-0.954995	1.61e-06	D	-1.1373	3.57e-09	D	DDDD
Tmem56	240.847	-1.02195	0.0149962	D	-1.11427	0.00307447	D	-1.29233	0.000385156	D	-1.00731	0.00680891	D	DDDD
Slc19a1	248.702	-0.704811	0.00881107	D	-1.14029	6.3e-07	D	-1.58744	1.02e-12	D	-1.27946	8.76e-09	D	DDDD
Dram1	250.971	-0.6552	0.000271147	D	-0.865501	1.4e-07	D	-1.47248	1.29e-19	D	-1.01373	2.56e-10	D	DDDD
Ptk2b	265.094	-0.637675	0.000455905	D	-0.921981	1.79e-08	D	-1.36095	4.84e-17	D	-0.972171	1.55e-09	D	DDDD
Slc22a3	274.531	-0.840734	0.000958582	D	-0.922127	9.32e-05	D	-0.831517	0.000489146	D	-1.14489	3.42e-07	D	DDDD
Tshr	278.743	-1.03525	0.00156177	D	-1.77381	4.11e-10	D	-4.20121	5.97e-46	D	-1.64391	5.01e-09	D	DDDD
Hcar1	286.814	-1.56929	0.027557	D	-2.03966	0.000848949	D	-2.01468	0.000866317	D	-2.39005	3.72e-05	D	DDDD
Fam107b	295.985	-1.00937	1.36e-07	D	-1.04801	1.36e-08	D	-0.750024	9.63e-05	D	-1.27043	1.61e-12	D	DDDD
Marcks	297.278	-1.10285	9.75e-07	D	-1.61663	1.39e-14	D	-1.57725	6.92e-14	D	-1.55528	8.25e-14	D	DDDD
C9orf72	320.31	-1.00962	9.54e-07	D	-0.862462	2.31e-05	D	-1.59612	1.04e-16	D	-1.66411	1.78e-18	D	DDDD
Egln3	322.641	-0.902992	4.33e-06	D	-1.09403	3e-09	D	-1.21078	3.8e-11	D	-1.35111	5.73e-14	D	DDDD
Btg2	325.677	-1.38263	1.07e-05	D	-2.04212	1.17e-12	D	-2.26112	2.17e-15	D	-1.80886	2.63e-10	D	DDDD
Irf2bp2	337.305	-0.951432	3.46e-09	D	-1.47558	4.31e-22	D	-0.786998	8.86e-07	D	-1.29871	1.75e-17	D	DDDD
Ppfibp1	350.235	-0.607203	0.000660885	D	-1.10365	1.47e-12	D	-1.34567	6.22e-18	D	-0.925384	3.14e-09	D	DDDD
A530053G22Rik	370.363	-1.05547	0.0348456	D	-1.10798	0.0126979	D	-1.00332	0.0264565	D	-1.98862	4.59e-07	D	DDDD
Irs1	380.74	-1.07095	0.00139026	D	-1.36534	5.98e-06	D	-1.57399	7.95e-08	D	-1.55596	8.31e-08	D	DDDD
Cyp4b1	382.48	-0.728989	0.0306138	D	-0.655713	0.0347995	D	-1.01405	0.000343962	D	-1.59509	1.53e-09	D	DDDD
Afap1	393.325	-1.06013	2.43e-07	D	-1.43316	1.15e-13	D	-1.20143	7.81e-10	D	-1.47183	1.24e-14	D	DDDD
Msrb3	397.741	-0.657421	0.00117988	D	-0.876473	1.48e-06	D	-1.38135	2.52e-15	D	-1.2512	5.1e-13	D	DDDD
Enc1	460.639	-1.3819	3.31e-11	D	-1.94871	1.26e-22	D	-1.84803	3.04e-20	D	-1.12032	4.46e-08	D	DDDD
Trarg1	487.473	-1.11411	0.000196417	D	-2.44375	5.35e-21	D	-2.5453	1.41e-22	D	-2.12512	2.8e-16	D	DDDD
Sntb1	488.268	-0.914599	0.0149838	D	-1.90678	4.27e-10	D	-1.34739	2e-05	D	-1.19115	0.000171358	D	DDDD
Ppp1r3d	522.462	-1.1455	5.32e-06	D	-1.24329	1.85e-07	D	-1.6794	2.77e-13	D	-1.7468	1.7e-14	D	DDDD
Gnai1	544.36	-0.78077	0.00224133	D	-1.09374	1.27e-06	D	-1.09311	1e-06	D	-1.31229	1.42e-09	D	DDDD
Rbfox2	546.275	-0.632131	0.000872397	D	-1.1809	6.81e-13	D	-0.993633	2.42e-09	D	-1.17653	4.78e-13	D	DDDD
Zfp36l1	611.897	-1.51218	3.01e-09	D	-1.88984	7.26e-15	D	-1.59633	6.77e-11	D	-1.09596	1.48e-05	D	DDDD
Zeb2	623.416	-1.55787	6.29e-21	D	-1.56811	2.15e-21	D	-1.80569	7.28e-28	D	-1.06336	2.48e-10	D	DDDD
Ppp1r3c	692.233	-1.11329	6.96e-07	D	-1.47934	1.68e-12	D	-1.13204	1.23e-07	D	-1.44302	3.47e-12	D	DDDD
Pgrmc2	692.866	-0.767176	0.000186759	D	-1.09719	2.99e-09	D	-1.22488	1.7e-11	D	-1.43054	1.17e-15	D	DDDD
B3galt2	763.459	-2.42587	3.46e-09	D	-3.43376	6.68e-19	D	-5.55487	8.51e-47	D	-4.32738	4.47e-30	D	DDDD
Acvr1c	860.72	-1.24203	1.63e-10	D	-0.940211	1.78e-06	D	-1.47436	2.24e-15	D	-1.71172	1.02e-20	D	DDDD
Gprc5b	948.267	-0.679743	0.00100136	D	-0.72872	0.000142599	D	-0.798668	1.88e-05	D	-1.43858	1.55e-16	D	DDDD
Arxes2	1080.65	-0.975131	0.00379927	D	-1.10556	0.000295653	D	-1.04701	0.000575598	D	-3.24853	3.91e-33	D	DDDD
Tmem64	1374.77	-0.728788	0.00104357	D	-0.748576	0.000318545	D	-0.880262	1.03e-05	D	-0.99404	3.09e-07	D	DDDD
Pank3	3352.65	-0.806395	6.46e-07	D	-0.714	7.42e-06	D	-0.819541	1.04e-07	D	-1.5244	9.6e-26	D	DDDD
Nabp1	3567.75	-2.2783	6.37e-16	D	-2.08693	1.14e-13	D	-2.76705	4.24e-24	D	-3.40868	1.08e-36	D	DDDD
Fam78b	133.661	-0.775873	0.00557573	D	-1.43804	2.22e-09	D	-1.50796	5.29e-10	D	-0.413878	0.148161	N	DDDN	YES	1	10166
Ptpn14	164.104	-0.888687	0.000127014	D	-0.937247	2.02e-05	D	-1.09016	5.34e-07	D	-0.140752	0.651982	N	DDDN	YES	1	17307
Ncoa7	320.625	-1.13958	1.97e-06	D	-1.52308	1.14e-11	D	-0.765649	0.00170405	D	-0.304518	0.296566	N	DDDN	YES	1	3495
Glrx	317	-0.802419	0.000236965	D	-1.08937	4.19e-08	D	-0.696644	0.000961713	D	-0.278362	0.266065	N	DDDN	YES	1	3641
Dhx32	402.754	-0.999125	6.19e-05	D	-1.14207	1.02e-06	D	-0.911131	0.000141851	D	-0.509371	0.0520126	N	DDDN	YES	1	396
Tbc1d4	545.749	-0.684786	0.000660955	D	-0.743473	7.03e-05	D	-0.647154	0.000657745	D	0.0643879	0.831176	N	DDDN	YES	1	-4356
Arhgap20	16.2542	-1.02591	0.042818	D	-1.19094	0.00831428	D	-2.45822	2.77e-06	D	-0.303114	0.585407	N	DDDN
Frat1	24.1108	-1.20744	0.00184198	D	-1.47797	4.74e-05	D	-1.28482	0.000666284	D	-0.682683	0.072768	N	DDDN
Hephl1	25.8296	-1.6218	0.00918529	D	-1.67814	0.00323495	D	-1.62524	0.00505681	D	-0.777799	0.219786	N	DDDN
Cdc42ep5	34.17	-0.85434	0.0224753	D	-1.06139	0.00145152	D	-1.01961	0.00308772	D	-0.533525	0.139893	N	DDDN
Tubb2a	34.4729	-1.37373	0.00224133	D	-1.75846	2.18e-05	D	-2.16071	4.34e-07	D	-0.408053	0.425477	N	DDDN
Ica1	42.9335	-0.779619	0.0096735	D	-1.28782	1.74e-06	D	-1.2762	5.29e-06	D	-0.246652	0.465131	N	DDDN
Tmem159	56.9627	-0.637744	0.0124347	D	-0.641254	0.00609894	D	-0.731729	0.00220666	D	-0.436421	0.0737668	N	DDDN
Cdr2	57.1156	-0.81597	0.0168582	D	-0.778196	0.0130735	D	-1.15027	0.000163464	D	-0.550823	0.0911379	N	DDDN
Fst	57.8904	-0.917646	0.000159886	D	-1.68788	3.91e-13	D	-1.50599	3.58e-10	D	-0.297233	0.28004	N	DDDN
Arap2	64.8942	-0.976515	0.000747155	D	-1.02344	0.000166923	D	-0.983501	0.000401547	D	-0.509702	0.0848095	N	DDDN
Actg1	67.0351	-1.18434	0.0366351	D	-1.40629	0.004507	D	-1.46412	0.00293556	D	-0.422933	0.496634	N	DDDN
Pygo1	72.7531	-0.831225	0.0352218	D	-1.18623	0.000436577	D	-1.06311	0.00200244	D	-0.572624	0.125117	N	DDDN
Tbc1d31	73.1743	-1.09035	6.85e-07	D	-1.28394	1.4e-09	D	-1.25963	8.63e-09	D	-0.512666	0.0244946	N	DDDN
Ralgps1	75.6043	-0.925374	0.000116551	D	-0.758329	0.00121576	D	-1.02986	1.04e-05	D	-0.184877	0.542554	N	DDDN
Tmem263	75.8982	-0.620616	0.0035094	D	-0.704326	0.000322076	D	-0.772474	0.000124563	D	-0.194316	0.422041	N	DDDN
Gm2996	85.4032	-0.669504	0.0305103	D	-1.18959	4.54e-06	D	-0.885188	0.00109191	D	-0.458355	0.119208	N	DDDN
Cldn5	99.2401	-0.814925	0.0357877	D	-1.57194	7.97e-07	D	-2.63124	8.83e-16	D	-0.0852139	0.873876	N	DDDN
Med12l	103.854	-0.909539	6.33e-05	D	-1.2476	4.29e-09	D	-1.02721	2.69e-06	D	-0.164075	0.581242	N	DDDN
Tanc2	117.784	-0.693396	0.00512645	D	-0.975599	8.89e-06	D	-1.11466	4.31e-07	D	-0.150223	0.62564	N	DDDN
Kif2a	124.709	-0.816953	6.54e-06	D	-0.799949	4.77e-06	D	-0.6084	0.000944816	D	-0.59536	0.000792817	N	DDDN
Dock7	165.125	-0.734416	7.21e-07	D	-0.820773	8.31e-09	D	-0.862868	3.41e-09	D	-0.326937	0.0393533	N	DDDN
Smurf1	174.198	-0.731742	0.000139406	D	-0.664288	0.000349524	D	-0.664844	0.000387195	D	-0.42158	0.0312096	N	DDDN
Abcc5	187.167	-0.614046	0.000578591	D	-1.31901	8.39e-17	D	-1.28158	2.52e-15	D	-0.425739	0.0147211	N	DDDN
Zfhx3	204.033	-0.665539	0.0191928	D	-0.786517	0.00170471	D	-0.630701	0.015915	D	-0.580149	0.0244946	N	DDDN
Snx7	210.177	-0.605501	0.00576012	D	-0.708499	0.000346034	D	-0.649309	0.00124118	D	-0.526851	0.00919217	N	DDDN
Rnf2	232.485	-0.69986	1.88e-05	D	-0.665572	2.55e-05	D	-0.626307	9.54e-05	D	-0.557642	0.000423016	N	DDDN
Mal2	248.968	-0.908024	0.0314775	D	-1.16885	0.00128428	D	-1.06701	0.00354245	D	-0.461319	0.284327	N	DDDN
Cep170	348.465	-0.959855	1.33e-11	D	-0.718358	5.23e-07	D	-0.823709	6.21e-09	D	-0.542604	0.000188366	N	DDDN
Ccng2	418.595	-1.02239	0.0366351	D	-1.41493	0.000630312	D	-1.26321	0.00244945	D	-0.781229	0.0838502	N	DDDN
Lama4	424.369	-0.949135	5.28e-12	D	-0.8552	3.46e-10	D	-0.74948	6.04e-08	D	-0.539359	0.000129151	N	DDDN
Xbp1	966.276	-0.782855	0.000660955	D	-0.651327	0.00352621	D	-0.663977	0.00255287	D	-0.551268	0.0137589	N	DDDN
Ank	2483.67	-0.63494	0.00416276	D	-0.849414	1.34e-05	D	-0.627053	0.00200146	D	-0.485616	0.020647	N	DDDN
Cyb5b	4398.45	-0.696766	0.0014353	D	-0.846961	1.87e-05	D	-0.726205	0.000283446	D	-0.54309	0.00891253	N	DDDN
Lonrf1	95.3757	-1.67608	9.08e-10	D	-0.963011	0.000602352	D	-0.452773	0.169227	N	-0.95163	0.000521644	D	DDND	YES	1	1220
Pik3r1	1409.41	-2.54785	5.02e-08	D	-1.35681	0.0068883	D	-0.954487	0.0787398	N	-1.39995	0.00380736	D	DDND	YES	1	-401
Gm527	22.7083	-1.02838	0.00603711	D	-1.03763	0.00280545	D	-0.524086	0.189646	N	-0.873921	0.0117525	D	DDND
Ascl1	25.7979	-1.82975	0.00188163	D	-1.55801	0.00531655	D	-0.528834	0.458951	N	-2.31267	1.91e-05	D	DDND
Lhx8	38.9726	-1.23814	0.00037955	D	-0.749136	0.0320473	D	-0.493217	0.208533	N	-0.738883	0.0312571	D	DDND
Col8a1	41.3896	-0.796111	0.00705124	D	-0.773259	0.00477379	D	-0.251037	0.485951	N	-0.758465	0.00505404	D	DDND
Ccdc122	48.0292	-0.928424	0.000515918	D	-0.979909	0.000103784	D	-0.586474	0.0348077	N	-0.896993	0.000335625	D	DDND
Dach1	49.5233	-1.20835	2.7e-06	D	-0.870722	0.000598401	D	-0.460449	0.113607	N	-0.727182	0.0041616	D	DDND
Haus3	50.1077	-1.12444	0.0101751	D	-1.1435	0.00424837	D	-0.621381	0.173997	N	-0.988647	0.0131825	D	DDND
Iqcb1	50.1685	-0.75609	0.00360743	D	-0.794826	0.000982872	D	-0.467024	0.0865352	N	-0.662684	0.0061595	D	DDND
Lacc1	50.6676	-1.14359	0.000255695	D	-1.31324	8.7e-06	D	-0.292464	0.463338	N	-0.827438	0.0060636	D	DDND
Zfp810	54.8962	-0.658214	0.0363846	D	-0.92521	0.000672894	D	-0.2016	0.602831	N	-0.86041	0.00137581	D	DDND
Fign	63.0292	-0.869282	0.0168582	D	-1.05533	0.00108284	D	-0.656523	0.0650823	N	-0.881742	0.0062988	D	DDND
Nat1	63.6481	-0.675822	0.0225101	D	-0.635108	0.0195793	D	-0.163187	0.672835	N	-0.706597	0.00707383	D	DDND
Kif21a	97.7853	-1.04546	2e-07	D	-1.05377	6.58e-08	D	-0.417964	0.0662595	N	-0.767443	9.76e-05	D	DDND
Casp3	132.306	-1.06531	0.00863569	D	-1.29033	0.000354508	D	-0.510996	0.246596	N	-0.891713	0.0169375	D	DDND
Sgk3	143.09	-0.77531	0.000571161	D	-0.893639	1.87e-05	D	-0.237267	0.395294	N	-1.07057	1.15e-07	D	DDND
Vps45	165.23	-0.742621	0.00326693	D	-0.655177	0.00628507	D	-0.278645	0.347168	N	-0.749946	0.00103797	D	DDND
Fat1	297.599	-0.627409	0.00958286	D	-0.66205	0.00258762	D	-0.522166	0.0234686	N	-0.753718	0.000321785	D	DDND
Ypel2	349.973	-0.67855	0.0066824	D	-1.20069	1.38e-08	D	-0.457469	0.0686998	N	-0.854226	7.64e-05	D	DDND
March7	402.823	-0.628513	0.00465622	D	-0.83131	2.36e-05	D	-0.53667	0.0109946	N	-0.675351	0.000626244	D	DDND
Baz2b	431.514	-0.936369	1.35e-09	D	-0.66817	2.17e-05	D	-0.578642	0.000303306	N	-0.719814	2.28e-06	D	DDND
Gm37784	432.092	-1.46823	7.38e-07	D	-1.31138	6.79e-06	D	-0.490457	0.167862	N	-1.56653	1.97e-08	D	DDND
Insig1	1013.83	-1.35228	1.36e-07	D	-1.21498	1.45e-06	D	-0.490023	0.10378	N	-1.30246	9.66e-08	D	DDND
Fam13a	2531.9	-1.25159	1.19e-07	D	-0.736942	0.00310883	D	-0.595015	0.0213474	N	-0.94275	4.89e-05	D	DDND
Kank1	179.984	-0.637823	0.0161155	D	-1.03806	3.84e-06	D	-0.594329	0.0157349	N	-0.332847	0.218024	N	DDNN	YES	2	-29391	406
Nos3	163.832	-0.754801	0.0286949	D	-0.929687	0.0019273	D	-0.589729	0.0749342	N	-0.146478	0.732263	N	DDNN	YES	2	-7087	18741
Chst15	264.007	-0.795673	0.0156336	D	-0.66919	0.0310273	D	-0.274033	0.486437	N	0.152527	0.71135	N	DDNN	YES	1	14108
Fgf2	111.646	-0.707462	0.0148579	D	-0.612877	0.0244127	D	-0.405651	0.180766	N	-0.311247	0.311098	N	DDNN	YES	1	5865
Marc1	187.341	-1.17683	0.0270396	D	-1.37788	0.00310134	D	-0.75234	0.158648	N	-0.316785	0.613225	N	DDNN	YES	1	-18941
Nck2	21.2751	-0.896772	0.0386418	D	-0.814088	0.0399394	D	-0.719633	0.0926483	N	0.266817	0.552019	N	DDNN
1110018N20Rik	27.9522	-0.894771	0.0328004	D	-1.02856	0.00597991	D	-0.49247	0.262942	N	-0.366937	0.400241	N	DDNN
Gramd1c	37.4195	-1.21907	0.00124435	D	-0.887477	0.0157031	D	-0.72376	0.0647714	N	-0.656855	0.0821138	N	DDNN
Stc1	39.1821	-1.12332	0.0239656	D	-1.1244	0.0126579	D	-0.644607	0.209004	N	-0.295065	0.608909	N	DDNN
Zfp964	42.4716	-0.881066	0.019276	D	-0.698554	0.049601	D	-0.262152	0.57279	N	-0.503528	0.174822	N	DDNN
Gm26684	45.3589	-1.53859	0.000588601	D	-1.14541	0.00864435	D	-0.477154	0.372839	N	-0.356445	0.509802	N	DDNN
Snhg5	52.8485	-0.835935	0.021138	D	-0.68234	0.045693	D	-0.60555	0.0923485	N	-0.633451	0.0609006	N	DDNN
Pdzrn3	59.41	-1.60952	1.18e-05	D	-0.950753	0.0106827	D	-0.369968	0.431876	N	-0.321746	0.479709	N	DDNN
Rassf2	65.4921	-0.86794	0.0375671	D	-0.884979	0.0181995	D	-0.105549	0.864035	N	0.02252	0.972135	N	DDNN
Xk	73.1282	-0.791613	0.0353337	D	-0.694108	0.045693	D	0.128726	0.805398	N	0.430825	0.232612	N	DDNN
Airn	74.5439	-0.664967	0.00428189	D	-0.84446	6.47e-05	D	-0.431694	0.0737162	N	-0.504628	0.0224659	N	DDNN
Oma1	80.6943	-0.621271	0.0133756	D	-0.765692	0.00062439	D	-0.561098	0.0195079	N	-0.428918	0.0739609	N	DDNN
Fzd1	89.1579	-0.703474	0.00215981	D	-0.647444	0.00281414	D	-0.457586	0.0539416	N	-0.320864	0.185235	N	DDNN
Prrg1	92.3625	-0.680548	0.045855	D	-0.811998	0.00631475	D	-0.597189	0.0624751	N	0.109146	0.801576	N	DDNN
Tmem131l	100.833	-1.01063	0.000349381	D	-0.924576	0.000648205	D	-0.0936415	0.838205	N	0.493213	0.0802892	N	DDNN
Nr3c2	115.322	-1.34636	4.48e-06	D	-0.924787	0.00176251	D	-0.333458	0.373949	N	-0.251515	0.507537	N	DDNN
Ttl	120.42	-0.625681	0.0133853	D	-0.923483	2.72e-05	D	-0.246883	0.399118	N	0.257948	0.330316	N	DDNN
Phip	147.187	-0.61517	0.00133189	D	-0.632037	0.000431393	D	-0.286723	0.180291	N	-0.544879	0.00235885	N	DDNN
Angpt1	158.072	-1.03456	0.0038238	D	-0.720846	0.0422062	D	-0.21994	0.651243	N	0.0265556	0.965963	N	DDNN
Twist1	176.038	-0.762847	1.66e-06	D	-0.606453	0.000123952	D	-0.163276	0.448939	N	-0.197683	0.303079	N	DDNN
Psd3	180.288	-0.662215	0.000279536	D	-0.621552	0.000377461	D	-0.207858	0.358137	N	-0.510322	0.00370727	N	DDNN
Fam241a	182.831	-1.12822	9.02e-08	D	-0.721507	0.000849391	D	-0.406705	0.0972466	N	-0.345202	0.156947	N	DDNN
Abcg2	184.042	-0.616686	0.00917193	D	-0.811646	0.000100885	D	0.0638818	0.863192	N	-0.0186516	0.962479	N	DDNN
Retreg1	185.77	-0.951194	0.0118397	D	-0.818621	0.0211121	D	-0.0719495	0.905836	N	-0.10261	0.847723	N	DDNN
Kit	193.859	-2.33042	1.4e-05	D	-2.6011	2.84e-07	D	0.163052	0.860815	N	-0.870227	0.147352	N	DDNN
Mblac2	200.313	-0.887616	0.0491719	D	-1.07177	0.00597214	D	-0.0379629	0.958897	N	-0.397018	0.39968	N	DDNN
Sqle	203.942	-0.767105	0.041062	D	-0.808546	0.0154342	D	0.527759	0.146801	N	0.230732	0.588826	N	DDNN
Cep85l	278.301	-0.714526	0.0014091	D	-0.601461	0.00531957	D	-0.325539	0.19188	N	-0.442306	0.0475329	N	DDNN
Nhsl2	279.812	-1.1082	1.47e-10	D	-0.677691	0.000154037	D	-0.443119	0.0224058	N	-0.500812	0.00627443	N	DDNN
Arl15	302.455	-1.01755	4.65e-07	D	-0.901551	5.49e-06	D	-0.572781	0.0071306	N	-0.515449	0.0148572	N	DDNN
Kctd12b	323.641	-0.624476	0.00462713	D	-0.712873	0.000364548	D	-0.350814	0.132502	N	-0.425272	0.0470235	N	DDNN
Dennd4a	429.163	-0.972973	2.11e-07	D	-0.985726	5.33e-08	D	-0.422166	0.0447703	N	0.178962	0.468107	N	DDNN
Impa2	560.055	-0.655601	0.0166848	D	-0.614798	0.0148215	D	-0.305589	0.309993	N	-0.321967	0.255994	N	DDNN
Arhgap5	2034.04	-0.703043	0.00251914	D	-0.781278	0.000246531	D	-0.43884	0.0664537	N	-0.412505	0.0786269	N	DDNN
Osgin1	59.0614	-1.61333	0.0244338	D	-1.57278	0.0157177	D	0.0834322	0.941902	N	1.47216	0.0150817	U	DDNU	YES	2	-14550	3552
Rorc	427.218	-0.602178	0.00893014	D	-0.76709	0.000157708	D	1.13811	5.39e-10	U	0.5796	0.00406309	N	DDUN
Net1	376.664	-1.4017	0.00326693	D	-0.84279	0.0857898	N	-0.984676	0.0374343	D	-1.57598	0.000182663	D	DNDD	YES	1	16354
Apcdd1	22.0666	-1.32686	0.012537	D	-0.643352	0.237679	N	-1.74389	0.0004204	D	-1.33536	0.00507028	D	DNDD
Zfp512b	54.7943	-0.628155	0.0204099	D	-0.45671	0.0790839	N	-0.928593	0.000162177	D	-0.61122	0.0121002	D	DNDD
Fibin	61.679	-1.27445	9.48e-05	D	-0.467047	0.202277	N	-0.739423	0.0302251	D	-1.20008	9.47e-05	D	DNDD
Slc25a10	69.586	-0.911106	0.00605608	D	-0.358399	0.325917	N	-0.859375	0.00612213	D	-0.815254	0.00744739	D	DNDD
Siah1a	78.1322	-0.786858	0.000753681	D	-0.439098	0.0688205	N	-0.778707	0.000580729	D	-0.808028	0.000183215	D	DNDD
Tspyl2	87.3645	-0.618385	0.00201184	D	-0.596149	0.00157677	N	-0.759414	6.31e-05	D	-0.656972	0.000342162	D	DNDD
Fbxo45	92.3223	-0.670473	0.000435876	D	-0.443572	0.0206279	N	-0.627053	0.000840664	D	-1.02356	5.18e-09	D	DNDD
Dcun1d3	310.454	-1.08695	0.0436701	D	-0.786034	0.129316	N	-1.19851	0.0107486	D	-1.63716	0.000169068	D	DNDD
Nrip1	325.58	-0.870269	0.0305103	D	-0.579077	0.142722	N	-1.20787	0.000353168	D	-1.2738	0.000107916	D	DNDD
Rfx7	470.569	-0.702173	0.000127153	D	-0.211572	0.339721	N	-0.754713	1.12e-05	D	-0.681449	6.7e-05	D	DNDD
Abcd2	445.757	-0.881479	0.00526161	D	-0.551451	0.0859214	N	-0.733373	0.0147187	D	-0.482826	0.133778	N	DNDN	YES	1	-134
Smtnl1	14.0189	-2.19299	0.0312855	D	0.787828	0.424871	N	-2.76523	0.00540317	D	0.405131	0.717235	N	DNDN
Shisa2	14.6075	-2.13022	0.0146109	D	-0.703336	0.448133	N	-2.32973	0.00484988	D	0.224519	0.841542	N	DNDN
Myom2	18.4273	-3.05214	0.0155843	D	0.469741	0.753791	N	-2.46676	0.0374664	D	-0.231278	0.893478	N	DNDN
Mlip	20.5308	-1.24732	0.0422058	D	0.189929	0.790137	N	-1.64673	0.00380556	D	0.174355	0.817907	N	DNDN
Phf13	20.9115	-0.98991	0.0148135	D	-0.73544	0.0556367	N	-1.13239	0.00369883	D	-0.364957	0.393328	N	DNDN
Hlcs	50.6499	-0.741371	0.0432137	D	-0.58137	0.0917121	N	-1.5544	9.52e-07	D	-0.642413	0.0523334	N	DNDN
Satb1	59.4773	-0.720198	0.0124329	D	-0.557046	0.0426778	N	-0.652308	0.0183666	D	-0.0437785	0.918577	N	DNDN
Ddit4l	63.5144	-2.74635	0.000248107	D	-1.40742	0.0741724	N	-2.16147	0.00298528	D	0.356179	0.726531	N	DNDN
Acvr1	69.7499	-0.849494	0.000202565	D	-0.440775	0.0649603	N	-0.643742	0.00544945	D	-0.523988	0.0212495	N	DNDN
Pfn2	77.8589	-0.698134	0.0201752	D	-0.377515	0.218872	N	-0.721307	0.00936343	D	-0.249114	0.450534	N	DNDN
Tmem182	402.056	-0.966764	2.44e-08	D	-0.438763	0.021439	N	-1.24284	6.03e-14	D	-0.317583	0.110458	N	DNDN
Ebf2	926.122	-0.601079	0.000126638	D	-0.355665	0.0306883	N	-0.656485	6.92e-06	D	-0.381275	0.015378	N	DNDN
Srebf1	1087.32	-0.837068	0.00793827	D	-0.44084	0.183636	N	-0.00828334	0.988788	N	-0.668903	0.0226839	D	DNND	YES	1	-4438
Adamts6	13.176	-1.21542	0.0314858	D	-0.373753	0.534389	N	-0.960952	0.0816588	N	-1.68277	0.000963516	D	DNND
Olfml1	31.3211	-0.90544	0.00909117	D	0.13897	0.73792	N	-0.534773	0.140851	N	-0.716435	0.0265298	D	DNND
A930033H14Rik	46.8461	-0.797189	0.0107045	D	-0.570826	0.0584734	N	-0.456836	0.163224	N	-0.881085	0.00156555	D	DNND
Fam204a	78.4007	-0.63127	0.0144151	D	-0.467049	0.060496	N	-0.310197	0.272499	N	-0.917854	3.72e-05	D	DNND
Gm8990	80.3064	-1.56754	0.00103971	D	-0.670465	0.202134	N	-0.820969	0.108442	N	-1.26649	0.00496759	D	DNND
Utp14b	164.828	-1.1309	0.000968828	D	-0.484656	0.201534	N	0.0194373	0.975776	N	-0.935686	0.00377505	D	DNND
Tbc1d24	211.074	-0.824719	7.23e-06	D	-0.498844	0.00868702	N	-0.187233	0.445686	N	-0.671489	0.000151525	D	DNND
Cdk6	214.332	-0.619948	0.0062837	D	-0.489157	0.0256045	N	-0.412877	0.0730947	N	-0.608923	0.00294333	D	DNND
Tent5a	243.974	-1.62664	1.66e-05	D	-0.720186	0.0857618	N	-0.242698	0.666364	N	-0.99397	0.00893746	D	DNND
Syncrip	305.257	-0.652181	0.000515918	D	-0.561122	0.00198109	N	-0.480288	0.0103482	N	-0.619999	0.000371522	D	DNND
Gm45769	356.197	-0.733902	0.039778	D	-0.527453	0.124767	N	-0.333148	0.396628	N	-1.26041	9.61e-06	D	DNND
Tdrp	357.173	-0.658253	0.0182137	D	-0.287852	0.339937	N	-0.526612	0.0481626	N	-0.816223	0.000578983	D	DNND
Oxr1	465.703	-0.632018	0.000135005	D	-0.534176	0.000978168	N	-0.292092	0.115716	N	-0.786651	1.62e-07	D	DNND
Cyp2e1	2708.02	-0.833663	0.000455441	D	0.49082	0.0487594	N	-0.509135	0.0387643	N	-2.06905	4.04e-25	D	DNND
Camkk2	201.5	-0.645525	0.0074721	D	-0.512532	0.0270725	N	0.108495	0.75292	N	0.179578	0.525007	N	DNNN	YES	2	-9120	535
Cyp51	338.741	-0.813825	0.0309718	D	-0.606526	0.0932156	N	0.632915	0.0750294	N	0.445915	0.234172	N	DNNN	YES	1	9931
Efna5	105.724	-0.630606	0.0044622	D	-0.252838	0.298361	N	-0.2993	0.224211	N	-0.0784343	0.797616	N	DNNN	YES	1	-2711
Map3k4	62.9617	-0.630328	0.0443616	D	-0.353619	0.259792	N	-0.161205	0.687458	N	0.233876	0.475017	N	DNNN	YES	1	-305
Cdkn2b	11.0513	-3.28991	1.06e-05	D	-1.13392	0.062773	N	-0.716597	0.296321	N	-0.579519	0.383031	N	DNNN
Mum1l1	13.2466	-1.50787	0.013828	D	-0.363765	0.58273	N	-0.327442	0.662434	N	-0.325467	0.630804	N	DNNN
Fut4	14.4944	-2.11456	0.000260507	D	-0.708434	0.214235	N	0.0347552	0.969723	N	-0.749681	0.180034	N	DNNN
Gm46404	17.0876	-1.06697	0.0360562	D	-0.237063	0.673894	N	0.0624207	0.934904	N	-0.105176	0.871675	N	DNNN
Gdf5	17.1502	-2.0276	0.00526161	D	-0.445768	0.571986	N	0.554445	0.467858	N	0.486304	0.509964	N	DNNN
Abca6	18.529	-1.00358	0.025553	D	-0.137647	0.792386	N	-0.220005	0.699688	N	-0.192351	0.709263	N	DNNN
Fzd5	21.4177	-0.928884	0.040756	D	-0.446542	0.327663	N	-0.379427	0.457042	N	-0.729092	0.0792696	N	DNNN
Gm5815	21.5573	-0.838047	0.0498564	D	-0.111984	0.825361	N	-0.102172	0.866469	N	-0.336335	0.442819	N	DNNN
Klhl4	22.9985	-1.03804	0.0153864	D	-0.731101	0.0730767	N	-0.168946	0.774848	N	-0.564009	0.178553	N	DNNN
Nrap	24.3376	-2.82253	0.0489693	D	1.13264	0.422225	N	-1.17631	0.437389	N	1.35348	0.308365	N	DNNN
Sgo2a	25.2378	-1.32149	0.0207109	D	-0.187407	0.784603	N	0.162755	0.838309	N	0.321593	0.607804	N	DNNN
Hist1h4c	27.2945	-1.34923	0.0411055	D	-0.766823	0.243228	N	-0.981857	0.126975	N	-1.02958	0.0893675	N	DNNN
1110002E22Rik	28.1706	-3.32966	0.0352378	D	-0.0933491	0.965123	N	-2.31321	0.125747	N	1.3912	0.372577	N	DNNN
Mycl	28.8772	-3.40144	0.00185948	D	-1.70143	0.132388	N	-1.31565	0.28072	N	-1.78947	0.0999684	N	DNNN
Styx	29.5036	-0.877991	0.0188552	D	-0.238354	0.569273	N	-0.0900048	0.871753	N	-0.414213	0.273139	N	DNNN
AC132307.5	31.3272	-1.15499	0.00352053	D	-0.480177	0.243485	N	0.50248	0.198115	N	-0.0391231	0.949004	N	DNNN
Jph1	43.7169	-1.3857	0.000957251	D	0.311155	0.514525	N	0.068771	0.921126	N	0.68683	0.0760975	N	DNNN
Btc	43.8972	-0.981384	0.0234453	D	-0.736314	0.0743305	N	-0.402706	0.410386	N	-0.626491	0.132652	N	DNNN
Bclaf3	50.8934	-0.615964	0.0427222	D	-0.507092	0.0734016	N	-0.558212	0.0545721	N	-0.4734	0.0923551	N	DNNN
Tarbp1	52.5554	-0.73112	0.0197984	D	-0.167207	0.648377	N	0.0323053	0.949577	N	0.131119	0.728677	N	DNNN
Tnfrsf10b	52.8671	-0.62332	0.0483424	D	-0.55634	0.0547311	N	-0.313313	0.360331	N	0.076469	0.852886	N	DNNN
Rassf1	53.3286	-0.69371	0.00398131	D	-0.299644	0.242083	N	-0.588572	0.0141408	N	-0.409309	0.0859374	N	DNNN
Trmt9b	54.0451	-0.796743	0.00690733	D	-0.375225	0.223136	N	-0.163228	0.682	N	-0.00745527	0.987844	N	DNNN
Gm11488	61.925	-0.863555	0.000377063	D	-0.599608	0.0125424	N	-0.189093	0.56229	N	-0.44822	0.0702674	N	DNNN
Cdkl5	69.9062	-0.878868	0.00351852	D	-0.329749	0.319743	N	0.0508566	0.919155	N	0.29195	0.369467	N	DNNN
Lpin2	69.9896	-0.673256	0.0491367	D	-0.514648	0.110505	N	-0.29883	0.433334	N	-0.0518975	0.914658	N	DNNN
Rhobtb3	80.1673	-0.715678	0.0166276	D	-0.599639	0.032822	N	-0.506741	0.0898816	N	-0.201572	0.561542	N	DNNN
Syde2	82.0118	-0.785726	0.0028217	D	-0.0111039	0.978069	N	-0.128434	0.735197	N	-0.447183	0.090292	N	DNNN
Rest	87.2536	-0.806144	0.000220467	D	-0.325146	0.174399	N	-0.544226	0.0157388	N	0.050075	0.881644	N	DNNN
Agfg2	94.502	-0.646814	0.0211419	D	-0.227111	0.465937	N	0.167865	0.635878	N	-0.00548577	0.990949	N	DNNN
Cdkal1	97.7732	-0.615767	0.0375479	D	-0.164077	0.630036	N	0.180672	0.617573	N	0.199081	0.539776	N	DNNN
1700066M21Rik	107.608	-0.627797	0.00740115	D	-0.508993	0.0231529	N	-0.460944	0.0493579	N	-0.383706	0.0970443	N	DNNN
Gm10762	107.75	-0.847937	0.0122675	D	-0.610714	0.0632145	N	-0.460317	0.196291	N	-0.0349175	0.948054	N	DNNN
Cwc27	109.599	-0.600109	0.0325105	D	-0.408531	0.134221	N	-0.226631	0.489809	N	-0.0894955	0.806745	N	DNNN
Stk38l	114.935	-0.733782	0.00600873	D	-0.407467	0.138032	N	-0.0333202	0.941902	N	-0.038757	0.925737	N	DNNN
Maml2	120.885	-0.676669	3.64e-05	D	-0.171357	0.387694	N	-0.132001	0.565949	N	-0.0851302	0.705163	N	DNNN
Polr3g	121.48	-0.785308	0.0311643	D	-0.377142	0.321211	N	0.318002	0.43338	N	0.0933366	0.85022	N	DNNN
Mob3b	141.428	-0.652558	0.00624561	D	-0.30863	0.225101	N	0.11953	0.719656	N	0.165776	0.558556	N	DNNN
Gab1	145.989	-0.606713	0.00896269	D	-0.358882	0.126844	N	0.34621	0.141283	N	-0.0761387	0.810368	N	DNNN
Lgr4	148.572	-0.646938	0.00326546	D	-0.438071	0.0458588	N	0.0865097	0.793599	N	-0.451743	0.0336831	N	DNNN
Mamld1	168.39	-0.665849	0.0172748	D	0.0688601	0.852238	N	-0.0103857	0.982828	N	0.37226	0.173523	N	DNNN
Arhgap24	168.635	-0.793585	0.00188163	D	-0.579138	0.0216963	N	-0.551461	0.0319924	N	-0.369647	0.172646	N	DNNN
Tcf7l2	178.221	-0.679855	0.00226474	D	-0.408371	0.0740471	N	-0.374657	0.115733	N	-0.555355	0.00805274	N	DNNN
Zic1	190.951	-0.624824	0.000880208	D	0.000807052	0.997881	N	0.452566	0.0116345	N	-0.477788	0.00805374	N	DNNN
Lats2	200.863	-0.609168	0.00137163	D	-0.285429	0.164253	N	-0.0648215	0.832312	N	-0.065532	0.810598	N	DNNN
Tlnrd1	230.948	-0.786501	0.00088688	D	-0.58946	0.0116725	N	-0.525152	0.0291475	N	-0.285664	0.284934	N	DNNN
Herc3	231.414	-0.876267	1.76e-05	D	-0.42378	0.0554739	N	0.271652	0.268946	N	-0.539319	0.00857072	N	DNNN
Rora	260.236	-0.635627	0.000331618	D	-0.418339	0.0202238	N	-0.23993	0.250504	N	-0.463799	0.00707143	N	DNNN
Cpeb2	260.511	-1.04913	4.53e-07	D	-0.496248	0.0284989	N	-0.344045	0.167282	N	-0.0901466	0.776713	N	DNNN
A530020G20Rik	333.654	-1.19753	0.018539	D	-0.9109	0.062859	N	-0.47507	0.415666	N	-0.659362	0.198221	N	DNNN
Rnf150	375.901	-0.777483	0.00252734	D	-0.592242	0.0190496	N	-0.0557908	0.896828	N	-0.0182989	0.968115	N	DNNN
Rpia	502.624	-0.777042	0.0118029	D	-0.448638	0.155753	N	0.199822	0.616642	N	0.307625	0.35944	N	DNNN
1190002N15Rik	547.001	-0.833653	0.000916611	D	-0.385715	0.161785	N	0.0671803	0.872364	N	-0.410129	0.122342	N	DNNN
C1galt1	564.072	-0.625934	1.9e-05	D	-0.440787	0.00294081	N	0.0152701	0.957535	N	-0.565089	4.83e-05	N	DNNN
Kctd12	597.562	-0.61198	0.0022672	D	-0.316599	0.138042	N	0.428751	0.029994	N	-0.278645	0.194531	N	DNNN
Tmc7	34.9704	-1.17253	0.00218591	D	0.0742111	0.882676	N	0.095042	0.869319	N	0.860886	0.00485283	U	DNNU
Nudt4	2085.95	-0.766157	0.00530647	D	-0.594201	0.0262516	N	0.153702	0.685909	N	1.08096	3.26e-06	U	DNNU
Inmt	61.1343	-1.06035	0.00785186	D	-0.32644	0.469087	N	1.01858	0.00243291	U	-0.110297	0.841802	N	DNUN
Slc46a3	209.515	-0.716777	0.030032	D	-0.48675	0.130687	N	0.92465	0.000680217	U	0.52391	0.0822185	N	DNUN
Wee1	108.303	-0.863808	0.0415766	D	-0.0894946	0.869815	N	1.82125	3.26e-09	U	0.903833	0.00863964	U	DNUU
Ppara	738.199	-0.116576	0.828961	N	-0.651753	0.0330672	D	-1.35322	3.51e-07	D	-1.15864	1.54e-05	D	NDDD	YES	5	-29635	-18636	-15083	-11061	-234
Txnip	9129.39	-0.567602	0.155595	N	-1.60868	1.97e-08	D	-1.0179	0.000832782	D	-0.711854	0.0267953	D	NDDD	YES	3	-2831	-292	16262
Gadd45g	223.964	-0.213448	0.682211	N	-1.48873	5.68e-07	D	-1.58055	8.11e-08	D	-1.4314	1.03e-06	D	NDDD	YES	2	22041	24610
Adipor2	4810.98	-0.133497	0.56034	N	-0.601284	2.18e-05	D	-0.711385	1.7e-07	D	-0.705788	1.71e-07	D	NDDD	YES	2	-1115	6022
Zfp423	116.031	-0.265913	0.304281	N	-0.849516	4.13e-06	D	-1.05353	1.51e-08	D	-1.05897	4.3e-09	D	NDDD	YES	2	-15310	21058
Prkag2	480.897	-0.077681	0.862657	N	-0.848833	0.000176028	D	-0.977219	8.54e-06	D	-0.824401	0.000191954	D	NDDD	YES	2	-5257	-3823
Gab2	164.315	-0.527333	0.0117334	N	-0.690077	0.000170528	D	-0.973087	5.48e-08	D	-1.13513	6.24e-11	D	NDDD	YES	1	20940
Rreb1	838.106	-0.522904	0.0265238	N	-0.77066	0.000100761	D	-0.994776	1.39e-07	D	-1.0014	8.11e-08	D	NDDD	YES	1	21504
Anxa2	917.755	-0.16212	0.662689	N	-1.1322	6.68e-08	D	-1.90402	1.88e-21	D	-0.86733	4.57e-05	D	NDDD	YES	1	23774
Ing2	125.885	-0.176344	0.642534	N	-0.981079	1.8e-05	D	-1.36408	1.57e-09	D	-1.12079	4.42e-07	D	NDDD	YES	1	25484
Klb	706.53	-0.0292094	0.949586	N	-0.664582	0.00135211	D	-1.42382	2.44e-14	D	-1.43479	8.88e-15	D	NDDD	YES	1	2629
Cd274	813.846	-0.881783	0.107661	N	-2.11051	2.82e-07	D	-1.81556	1.2e-05	D	-1.6504	7.14e-05	D	NDDD	YES	1	27367
Arhgef40	152.231	-0.428984	0.042999	N	-0.723262	3.92e-05	D	-1.11771	1.11e-10	D	-0.834767	9.57e-07	D	NDDD	YES	1	28943
4921507P07Rik	31.696	-0.645509	0.105243	N	-0.927191	0.00586475	D	-0.721947	0.0458095	D	-1.31863	5.17e-05	D	NDDD	YES	1	29917
Mmd2	95.9275	-0.0289173	0.967282	N	-0.733056	0.0291053	D	-1.4372	2.95e-06	D	-1.72335	7.61e-09	D	NDDD	YES	1	4261
Plin4	686.73	-0.174136	0.722865	N	-1.01523	0.000383468	D	-1.64606	4.55e-10	D	-1.86743	6.2e-13	D	NDDD	YES	1	482
Ski	693.165	-0.077571	0.818475	N	-0.691603	9.11e-05	D	-0.644974	0.000276395	D	-0.632947	0.000281489	D	NDDD	YES	1	5249
Odf3l1	224.949	-0.123048	0.856895	N	-0.782479	0.0401604	D	-0.7997	0.0351578	D	-0.86479	0.0169645	D	NDDD	YES	1	7812
2810004N23Rik	102.329	-0.497164	0.0732369	N	-1.73984	1.24e-15	D	-1.37384	5.05e-10	D	-1.35099	3.46e-10	D	NDDD	YES	1	-13109
Mc2r	89.5543	-0.607548	0.0537787	N	-1.32136	1.53e-07	D	-2.69027	2.03e-23	D	-2.43258	1.64e-21	D	NDDD	YES	1	-16590
Abcg1	96.1931	-0.6013	0.161598	N	-1.30899	6.7e-05	D	-1.00741	0.00307586	D	-1.08669	0.000911272	D	NDDD	YES	1	-18047
Lamb1	449.225	-0.38963	0.162868	N	-0.743784	0.00051223	D	-1.26227	2.03e-10	D	-1.04554	1.58e-07	D	NDDD	YES	1	-21033
Elmod2	710.561	-0.245134	0.575111	N	-1.19096	8.47e-06	D	-1.50092	4.77e-09	D	-2.06545	1e-16	D	NDDD	YES	1	-252
Sik1	416.565	-0.167735	0.914042	N	-1.91555	0.0118765	D	-1.97304	0.00847786	D	-1.89033	0.0106725	D	NDDD	YES	1	-6470
Bag4	364.046	-0.572447	2.03e-05	N	-0.710083	1.45e-08	D	-1.10983	3.1e-19	D	-1.57745	4.99e-38	D	NDDD	YES	1	-88
Pnrc1	1020.09	-0.614366	0.116857	N	-1.30999	1.14e-05	D	-1.31484	7.79e-06	D	-0.986012	0.00115958	D	NDDD	YES	1	-8867
Arid3a	10.5818	-0.2104	0.779933	N	-1.04979	0.0345981	D	-1.74759	0.00152787	D	-1.19212	0.0152174	D	NDDD
Npffr1	10.7648	-0.813123	0.322672	N	-1.48888	0.0233922	D	-2.31893	0.00086088	D	-1.70732	0.00771814	D	NDDD
Gm45220	11.2731	-1.20214	0.20393	N	-2.45399	0.00149472	D	-2.32335	0.0033631	D	-2.133	0.00475783	D	NDDD
Parpbp	11.4778	-0.741254	0.182825	N	-1.37387	0.00335178	D	-1.15096	0.0205723	D	-1.72747	0.000282373	D	NDDD
Ms4a14	11.8163	-0.668055	0.365469	N	-1.80941	0.00184512	D	-1.37078	0.0240025	D	-1.15987	0.045606	D	NDDD
Rnf122	12.1744	-0.797586	0.142654	N	-1.13599	0.0144876	D	-1.75083	0.000517202	D	-1.43168	0.00185176	D	NDDD
Tmigd1	12.6355	-0.99702	0.0656071	N	-1.49662	0.00153973	D	-1.99756	9.48e-05	D	-2.36921	2.42e-06	D	NDDD
A930007I19Rik	15.1672	-0.882622	0.104252	N	-1.31692	0.00457131	D	-1.36955	0.00468473	D	-1.68216	0.000262985	D	NDDD
Dnah3	16.1683	-0.733195	0.2401	N	-1.44424	0.00355372	D	-1.89142	0.00022856	D	-3.82287	1.39e-09	D	NDDD
Mccc1os	16.2447	-0.696272	0.174394	N	-1.00642	0.0184612	D	-1.67977	0.000167828	D	-2.50655	6.57e-08	D	NDDD
Hic2	16.5399	-0.807213	0.204769	N	-1.79607	0.00044553	D	-1.92562	0.00029107	D	-1.55004	0.00205135	D	NDDD
Gm28523	16.977	-0.846451	0.0502104	N	-1.65119	1.59e-05	D	-1.65385	4.14e-05	D	-1.9847	4.48e-07	D	NDDD
Ccdc144b	16.9961	-0.878177	0.136587	N	-1.99437	4.31e-05	D	-2.09196	3.79e-05	D	-2.51266	5.05e-07	D	NDDD
Dlgap1	17.0406	-0.725201	0.152434	N	-1.12981	0.0071027	D	-3.13475	4.66e-09	D	-2.64335	7.9e-09	D	NDDD
Ism1	18.9468	-0.554566	0.415069	N	-1.03489	0.0485696	D	-1.42699	0.00642676	D	-1.08772	0.0329907	D	NDDD
Lrrc9	19.8224	-0.678148	0.324071	N	-1.59821	0.00229939	D	-1.60267	0.00285878	D	-1.80643	0.000436301	D	NDDD
Dync2li1	19.8563	-0.376106	0.447507	N	-1.13278	0.0019273	D	-1.3644	0.000419114	D	-1.25714	0.00051335	D	NDDD
Hectd2os	20.3785	-0.589548	0.256484	N	-1.95255	1.73e-06	D	-2.05318	1.78e-06	D	-2.489	6.06e-09	D	NDDD
Gm37570	20.3791	-1.02041	0.0503219	N	-0.974017	0.0389277	D	-1.03837	0.0320414	D	-0.990821	0.0317444	D	NDDD
Elmo3	20.4046	-0.417779	0.375547	N	-0.863397	0.0180625	D	-1.348	0.000388474	D	-1.50349	3.07e-05	D	NDDD
Exd1	20.9592	-0.62132	0.198752	N	-1.34265	0.000523699	D	-1.58901	9.13e-05	D	-1.36631	0.000347097	D	NDDD
Mcm8	22.2855	-0.350245	0.577849	N	-0.948197	0.0350287	D	-0.940555	0.0446767	D	-1.1625	0.00718491	D	NDDD
Tmem14a	22.3862	0.0350358	0.961623	N	-0.743147	0.0489873	D	-0.843158	0.0322615	D	-0.841783	0.0220128	D	NDDD
1810059H22Rik	22.4257	-0.680912	0.181662	N	-1.03193	0.0135126	D	-1.5333	0.000291997	D	-1.85914	5.39e-06	D	NDDD
Gm10638	22.546	-1.18638	0.0922883	N	-1.47633	0.0146535	D	-2.06358	0.00054278	D	-2.06044	0.000335625	D	NDDD
Mdm1	22.8809	-0.701362	0.0695036	N	-1.0632	0.00137973	D	-1.52129	1.77e-05	D	-1.00375	0.00227918	D	NDDD
Gm14109	23.3514	-0.552222	0.450668	N	-1.47217	0.00524033	D	-1.49758	0.00521541	D	-2.50604	1.54e-06	D	NDDD
Maged2	23.8947	-0.290971	0.562636	N	-0.778759	0.0313685	D	-1.48023	7.34e-05	D	-0.874355	0.0130181	D	NDDD
C730034F03Rik	24.1293	-0.228678	0.694545	N	-0.963706	0.0117696	D	-1.4497	0.000240161	D	-0.996875	0.00793875	D	NDDD
Ssc4d	24.2665	-0.503474	0.235859	N	-0.960644	0.00458448	D	-1.51476	2.31e-05	D	-0.91448	0.00641658	D	NDDD
Exo5	24.6275	-0.453605	0.33132	N	-0.765119	0.0394275	D	-1.2227	0.00110868	D	-0.724026	0.0492068	D	NDDD
Dpysl3	24.6481	-0.290697	0.551853	N	-0.840637	0.0159201	D	-1.69568	5.05e-06	D	-0.695528	0.048233	D	NDDD
Lrriq3	25.9871	-0.233855	0.637358	N	-0.772159	0.022504	D	-0.871349	0.012786	D	-1.50707	5.39e-06	D	NDDD
Il33	26.4002	-0.548016	0.28285	N	-1.28035	0.0010967	D	-1.76801	1.3e-05	D	-1.33942	0.000494965	D	NDDD
A530041M06Rik	26.7406	-0.712446	0.0857439	N	-1.16179	0.000848949	D	-1.37107	0.000136542	D	-1.64975	1.83e-06	D	NDDD
2500004C02Rik	26.7992	-0.199763	0.676419	N	-0.760827	0.018148	D	-0.76399	0.0245981	D	-0.908266	0.00379323	D	NDDD
Lxn	28.1206	-0.159113	0.778629	N	-0.972938	0.00478093	D	-0.842399	0.0211164	D	-1.20423	0.000357274	D	NDDD
Alms1	28.9712	-0.591447	0.109754	N	-0.94877	0.0022332	D	-0.788797	0.0170547	D	-0.929514	0.00245712	D	NDDD
Spata22	29.8524	-0.422042	0.349725	N	-0.84293	0.0153743	D	-0.728491	0.049408	D	-0.976275	0.00381923	D	NDDD
Ccdc34	31.3348	-0.305797	0.451691	N	-0.853733	0.0039601	D	-1.01512	0.000994881	D	-0.742411	0.0121845	D	NDDD
Gm36595	32.438	-0.933703	0.0610922	N	-2.89967	6.94e-12	D	-3.46922	1.68e-13	D	-2.03851	4.51e-07	D	NDDD
Sema3c	34.0731	-0.748454	0.096927	N	-1.17858	0.00170928	D	-1.27868	0.000829525	D	-1.10292	0.002947	D	NDDD
Triqk	34.939	-0.681189	0.137819	N	-1.40391	0.000113097	D	-2.97007	3.55e-13	D	-2.66617	1.49e-12	D	NDDD
Itgb3bp	35.3974	-0.665034	0.0844292	N	-0.950392	0.00348405	D	-1.01295	0.00237702	D	-1.17755	0.000187472	D	NDDD
Acvr1b	36.2464	-0.590664	0.0638098	N	-0.647376	0.0214401	D	-0.612084	0.0401668	D	-0.911501	0.000705575	D	NDDD
Wdr93	36.6506	-0.471369	0.273822	N	-1.02711	0.00191939	D	-1.34789	6.16e-05	D	-1.0709	0.00095977	D	NDDD
Dusp5	36.676	-0.459862	0.530788	N	-1.04481	0.0482255	D	-1.39993	0.00609782	D	-1.12418	0.0270223	D	NDDD
Abca8b	37.082	-0.407479	0.220441	N	-0.911131	0.000509571	D	-0.74768	0.00729333	D	-0.759815	0.00374925	D	NDDD
Mfsd12	37.1543	-0.462756	0.380687	N	-0.928895	0.0201044	D	-0.909997	0.0268119	D	-1.00178	0.00964767	D	NDDD
Gm45188	37.4533	-0.639179	0.19461	N	-1.22711	0.00147332	D	-1.80977	2.71e-06	D	-1.98478	1.12e-07	D	NDDD
Sema5a	39.9219	-0.218941	0.606436	N	-0.984916	0.000451706	D	-1.17428	5.37e-05	D	-0.702998	0.0136962	D	NDDD
Efhd1	42.7915	-0.428804	0.231096	N	-0.65311	0.0242739	D	-1.6633	9.73e-09	D	-1.11783	3.67e-05	D	NDDD
Rbl1	43.02	-0.418212	0.233597	N	-0.739406	0.00790675	D	-0.999876	0.00038675	D	-0.747664	0.00626928	D	NDDD
Dennd2d	43.0229	-0.615673	0.159055	N	-1.08352	0.00196765	D	-0.782724	0.0374343	D	-0.821607	0.0209878	D	NDDD
Fam20c	43.3951	-0.814203	0.0658357	N	-0.806538	0.0412859	D	-1.00537	0.00954052	D	-0.922905	0.0143888	D	NDDD
Oscp1	43.9503	-0.467919	0.402015	N	-0.96832	0.0196699	D	-2.06343	2e-07	D	-2.43087	4.81e-10	D	NDDD
Serpine1	44.2603	-1.67626	0.113932	N	-2.12504	0.0173257	D	-2.35248	0.00709329	D	-2.71247	0.00117697	D	NDDD
Zeb2os	45.2039	-0.425671	0.345784	N	-0.913039	0.00688831	D	-1.46301	9.66e-06	D	-2.6808	7.78e-15	D	NDDD
Six4	45.5075	-1.3556	0.172506	N	-1.67674	0.043272	D	-1.93763	0.0162914	D	-1.73882	0.0294702	D	NDDD
Katnal2	46.0685	-0.662697	0.0915218	N	-0.840055	0.0119566	D	-1.38039	2.08e-05	D	-1.99513	3.65e-10	D	NDDD
AI429214	46.2562	-0.518842	0.273134	N	-1.41908	5.53e-05	D	-1.31312	0.000261697	D	-1.21193	0.000513403	D	NDDD
Dnajc12	46.7398	-0.442944	0.293743	N	-0.87323	0.00722955	D	-0.710768	0.0397762	D	-0.665867	0.0452804	D	NDDD
Ncapg2	47.2577	-0.537846	0.168837	N	-0.960995	0.00196713	D	-1.06047	0.000749047	D	-1.44508	1.33e-06	D	NDDD
Lrrcc1	47.5199	-0.640169	0.0934909	N	-1.05379	0.000851842	D	-0.762784	0.0237803	D	-1.02707	0.000943735	D	NDDD
Anapc10	51.6537	-0.459154	0.109754	N	-0.651035	0.00692908	D	-0.618402	0.0144287	D	-1.06157	4.29e-06	D	NDDD
Serf1	52.0361	-0.525274	0.189811	N	-0.69125	0.0375696	D	-0.788565	0.0173413	D	-1.70703	1.96e-08	D	NDDD
Rab40b	53.1141	-0.579431	0.0593031	N	-0.658823	0.0144289	D	-0.634709	0.0232115	D	-0.937051	0.000231356	D	NDDD
Mgst2	53.4629	-0.683927	0.0529286	N	-0.755717	0.0151194	D	-1.06811	0.000445302	D	-0.916114	0.00199683	D	NDDD
Gem	54.861	-1.09546	0.281566	N	-3.09417	2.57e-05	D	-3.08329	2.58e-05	D	-2.95615	4.03e-05	D	NDDD
Gm43071	57.318	-0.688913	0.0548279	N	-0.639419	0.049538	D	-0.710254	0.0295763	D	-1.04434	0.000431241	D	NDDD
Cdc25a	57.4244	-0.548902	0.312746	N	-1.18507	0.00344763	D	-2.00118	3.29e-07	D	-1.33639	0.00059818	D	NDDD
Unc119	59.5654	-0.52583	0.331533	N	-1.6172	2.59e-05	D	-2.64396	1.53e-11	D	-1.45632	0.000122174	D	NDDD
2610016A17Rik	59.7819	-0.425279	0.26118	N	-0.628778	0.0394846	D	-1.07189	0.000205008	D	-1.7193	6.15e-10	D	NDDD
Crispld2	60.1736	-0.357349	0.250874	N	-0.688295	0.00446821	D	-0.883858	0.000288916	D	-0.707687	0.00284656	D	NDDD
Cd55	62.6771	-0.305972	0.450668	N	-0.75119	0.00960975	D	-1.33628	1.8e-06	D	-1.55899	8.85e-09	D	NDDD
Tfr2	63.4838	-0.502102	0.293936	N	-1.0752	0.00273823	D	-0.907427	0.0148566	D	-1.91895	1.52e-08	D	NDDD
Fzd3	64.0696	-0.587819	0.0784178	N	-0.650921	0.0256265	D	-0.92285	0.00104562	D	-1.52295	1.02e-08	D	NDDD
Msh6	68.9363	-0.531684	0.0214728	N	-0.702618	0.000556783	D	-0.865192	3.11e-05	D	-0.62653	0.00199674	D	NDDD
Zbtb5	69.7008	-0.544093	0.0906304	N	-0.729551	0.00706928	D	-0.799595	0.00331499	D	-1.16254	4.7e-06	D	NDDD
Gng2	69.8654	-0.510782	0.118955	N	-0.775906	0.00391157	D	-1.12882	1.8e-05	D	-1.1491	6.16e-06	D	NDDD
Fgf14	71.1348	-0.160503	0.83338	N	-1.84718	3.07e-06	D	-1.8102	5.42e-06	D	-2.26399	5.14e-09	D	NDDD
Tmem216	71.3348	-0.368021	0.238258	N	-0.905502	0.000108822	D	-1.31448	2.62e-08	D	-1.10601	1.2e-06	D	NDDD
Rassf9	74.6803	0.0919627	0.846811	N	-0.936319	0.00026131	D	-0.773117	0.0038321	D	-0.7417	0.00403287	D	NDDD
Rfx5	79.8577	-0.394298	0.203415	N	-1.05977	5.01e-06	D	-0.847131	0.000456879	D	-0.864897	0.000192691	D	NDDD
Cep192	81.9988	-0.479309	0.0576032	N	-1.23156	1.58e-09	D	-1.03868	8.39e-07	D	-0.793716	0.000116261	D	NDDD
Fam161b	82.2388	-0.47597	0.109754	N	-0.702028	0.00434711	D	-0.66012	0.00923093	D	-0.733846	0.00218471	D	NDDD
Ctf1	83.5191	-0.341244	0.276915	N	-0.858182	0.000225063	D	-0.882645	0.00018602	D	-1.1671	1.94e-07	D	NDDD
Cfap36	87.6762	-0.270824	0.383689	N	-0.792042	0.000333716	D	-0.82601	0.000221966	D	-1.87935	8.67e-18	D	NDDD
Suco	93.4269	-0.470666	0.0253088	N	-0.785318	1.19e-05	D	-0.761102	4.01e-05	D	-0.633228	0.000436705	D	NDDD
Tspan2	94.0497	-0.449307	0.0219915	N	-0.706199	2.88e-05	D	-0.887517	2.51e-07	D	-1.23536	1.33e-13	D	NDDD
Mthfr	98.4736	-0.913321	0.0888365	N	-1.83736	1.43e-05	D	-1.27715	0.00397441	D	-1.09992	0.0133012	D	NDDD
Zfp704	110.402	-0.343141	0.107446	N	-0.720076	2.08e-05	D	-0.624287	0.000396579	D	-0.954056	7.39e-09	D	NDDD
Nsd2	111.811	-0.442311	0.0205115	N	-0.643153	9.83e-05	D	-1.06021	1.73e-10	D	-0.880223	3.58e-08	D	NDDD
Morc4	113.089	-0.544021	0.0805362	N	-0.776122	0.00267383	D	-1.5239	5.73e-10	D	-0.627822	0.0163328	D	NDDD
Jazf1	114.738	-0.281464	0.369196	N	-0.944871	1.45e-05	D	-1.17107	7.42e-08	D	-0.797369	0.000243503	D	NDDD
Gm45716	118.44	-0.509048	0.239377	N	-1.44604	3.54e-06	D	-1.22323	0.000116978	D	-2.50177	1.74e-16	D	NDDD
BC067074	127.167	-0.551805	0.265045	N	-0.842257	0.0319998	D	-1.22348	0.000824049	D	-2.25842	3.82e-11	D	NDDD
Tmeff1	128.131	-0.840615	0.0696275	N	-1.03931	0.00835382	D	-1.62238	9.88e-06	D	-1.63509	5.69e-06	D	NDDD
Zfp185	131.223	-0.433039	0.332215	N	-1.22015	0.000107031	D	-1.27746	4.31e-05	D	-2.08147	2.91e-12	D	NDDD
Chac2	135.47	-0.398543	0.220072	N	-0.886997	0.000283158	D	-0.706286	0.00544945	D	-0.707639	0.00403772	D	NDDD
Rfxank	136.915	0.187012	0.553231	N	-0.654417	0.00195034	D	-0.966294	2.44e-06	D	-0.609961	0.00351328	D	NDDD
Ston1	141.03	-0.401632	0.19342	N	-0.753167	0.00158197	D	-0.772741	0.00122169	D	-0.604466	0.0121255	D	NDDD
Lcorl	141.559	-0.598667	0.00316545	N	-0.89352	6.68e-07	D	-0.797426	1.52e-05	D	-0.928984	1.51e-07	D	NDDD
Plcb1	141.733	-0.356178	0.218514	N	-1.17105	1.65e-08	D	-1.30567	4.24e-10	D	-1.33225	7.09e-11	D	NDDD
Cdk19	142.643	-0.307149	0.111272	N	-0.911402	6.66e-10	D	-0.774157	4.34e-07	D	-0.757356	3.04e-07	D	NDDD
Ttc3	142.889	-0.553891	0.0132026	N	-0.659856	0.000893485	D	-0.8925	4.09e-06	D	-0.746641	9.47e-05	D	NDDD
Zbtb37	145.319	-0.381189	0.135301	N	-0.79191	6.61e-05	D	-0.651	0.00155115	D	-0.719091	0.00024877	D	NDDD
Pex12	146.003	-0.324393	0.126991	N	-0.631357	0.000165277	D	-0.897353	6.04e-08	D	-0.798228	7.42e-07	D	NDDD
Ctps2	148.47	-0.331629	0.0916892	N	-0.656109	2.88e-05	D	-0.830618	1.29e-07	D	-0.691618	6.81e-06	D	NDDD
Nap1l5	150.645	-0.287069	0.504	N	-0.878454	0.0023478	D	-0.702754	0.0200326	D	-1.08257	7.58e-05	D	NDDD
Impact	157.751	-0.425787	0.327886	N	-0.876225	0.00658228	D	-1.33071	1.03e-05	D	-1.41617	1.49e-06	D	NDDD
Pid1	164.281	-0.310229	0.390321	N	-0.941304	0.000170801	D	-0.804617	0.00171569	D	-0.766629	0.00231143	D	NDDD
Ugdh	165.238	-0.331344	0.11471	N	-0.709654	1.5e-05	D	-0.639899	0.000146021	D	-0.661735	4.51e-05	D	NDDD
Kctd21	174.684	-0.261945	0.366321	N	-0.652629	0.00171189	D	-0.991863	6.22e-07	D	-0.665499	0.00101839	D	NDDD
Clmn	183.024	-0.376484	0.106182	N	-0.613848	0.00111519	D	-1.40787	2.41e-15	D	-1.50329	5.81e-18	D	NDDD
Cdk14	192.248	-0.362303	0.115675	N	-0.912258	1.79e-07	D	-0.938443	1e-07	D	-1.18379	3.83e-12	D	NDDD
Lrig2	213.135	-0.371427	0.149044	N	-1.04832	3.44e-08	D	-0.734182	0.000227639	D	-0.672457	0.000609609	D	NDDD
Tmem165	215.665	-0.521922	5.54e-05	N	-0.742583	5.94e-10	D	-0.609472	1.04e-06	D	-0.660984	3.57e-08	D	NDDD
Stox2	215.878	-0.559104	0.000298857	N	-0.876309	3.86e-10	D	-0.633316	1.5e-05	D	-0.633233	8.27e-06	D	NDDD
Gm45187	238.74	-0.0935297	0.769308	N	-0.81505	2.42e-06	D	-1.42764	2.9e-17	D	-1.64027	5.46e-23	D	NDDD
Stam2	243.292	-0.409837	0.0022672	N	-0.616531	2.19e-07	D	-0.864734	4.91e-13	D	-0.864581	9.93e-14	D	NDDD
Gsr	243.479	-0.483366	0.00572697	N	-0.761398	5.13e-07	D	-1.10942	1.43e-13	D	-0.606547	7.19e-05	D	NDDD
Ophn1	245.529	-0.073588	0.865345	N	-0.771394	0.000501672	D	-0.800385	0.00027819	D	-0.974423	3.5e-06	D	NDDD
Syne1	254.612	-0.47271	0.0205327	N	-0.935003	2.36e-08	D	-0.831845	1.05e-06	D	-1.07377	5.97e-11	D	NDDD
2010-09-01	255.63	-0.475159	0.00695378	N	-0.697274	5.41e-06	D	-0.718384	3.04e-06	D	-0.669656	9.53e-06	D	NDDD
Pde3a	264.485	-0.352961	0.251177	N	-1.08694	5.29e-07	D	-1.25789	3.61e-09	D	-1.90784	4.04e-20	D	NDDD
Scn7a	288.238	-0.593087	0.0188552	N	-0.644876	0.00429917	D	-1.26069	8.64e-10	D	-1.49192	1.15e-13	D	NDDD
Tmem35b	292.753	-0.314899	0.378412	N	-0.749124	0.00332563	D	-0.896137	0.000274652	D	-1.87627	1.65e-16	D	NDDD
Tenm4	297.465	-0.0428647	0.930851	N	-0.92019	5.46e-05	D	-0.96923	1.67e-05	D	-0.953236	1.7e-05	D	NDDD
Ccdc69	299.407	-0.435181	0.0353212	N	-1.16061	8.62e-13	D	-1.31826	6.65e-16	D	-0.669178	7.14e-05	D	NDDD
Hebp2	299.772	-0.333301	0.289097	N	-0.754913	0.00103293	D	-1.21237	1.56e-08	D	-2.30211	2.99e-28	D	NDDD
Nadk2	309.607	-0.544327	0.0424762	N	-0.883604	6.57e-05	D	-0.8515	0.000117271	D	-0.934752	1.3e-05	D	NDDD
Brpf3	373.084	-0.403509	0.0390369	N	-0.693928	1.49e-05	D	-0.986126	1.69e-10	D	-0.789544	3.27e-07	D	NDDD
Smoc1	463.283	-0.513747	0.198633	N	-1.33098	4.04e-06	D	-1.51223	7.44e-08	D	-2.04019	6.24e-14	D	NDDD
Hexim1	468.104	-0.58102	0.00139026	N	-0.685828	3.59e-05	D	-1.0427	3.55e-11	D	-0.996491	1.7e-10	D	NDDD
Slc1a3	534.258	-0.595976	0.0416969	N	-0.898279	0.000225063	D	-1.42681	3.09e-10	D	-1.39664	5.38e-10	D	NDDD
Ptger3	545.621	-0.637748	0.265686	N	-1.61996	8.29e-05	D	-1.38407	0.000906795	D	-0.981808	0.0248969	D	NDDD
Spg21	569.726	-0.504079	0.00731239	N	-0.871081	3.96e-08	D	-1.27453	1e-16	D	-1.89594	3.13e-36	D	NDDD
Rnf144a	598.865	-0.356957	0.166079	N	-0.942558	5.05e-07	D	-0.601178	0.00264863	D	-0.742333	8.8e-05	D	NDDD
Ctcflos	669.163	-0.254488	0.590064	N	-0.727971	0.0213472	D	-1.17449	4e-05	D	-1.77177	5.32e-11	D	NDDD
Rbm47	688.65	-0.539207	0.00144166	N	-0.650888	2.31e-05	D	-0.881062	2.04e-09	D	-0.674435	6.32e-06	D	NDDD
Ccnl1	741.342	-0.269987	0.293594	N	-0.927158	1.24e-07	D	-1.02232	2.96e-09	D	-0.932207	5.98e-08	D	NDDD
Ankef1	803.151	-0.414557	0.128659	N	-0.858333	3.9e-05	D	-0.978644	1.29e-06	D	-0.61487	0.0041073	D	NDDD
Tbl1x	860.558	-0.569961	1.19e-07	N	-0.820831	3.46e-16	D	-1.07109	9.09e-27	D	-1.24	2.55e-36	D	NDDD
Rpe	884.138	-0.470972	0.0435875	N	-0.618222	0.00183292	D	-0.635811	0.0011532	D	-0.830745	6.72e-06	D	NDDD
Sorl1	886.965	-0.508463	0.16975	N	-0.945624	0.000859999	D	-0.716615	0.0158608	D	-0.824753	0.00348422	D	NDDD
Prnp	1170.56	-0.510834	0.0584428	N	-0.622158	0.0069818	D	-0.636603	0.00512055	D	-1.42046	1.49e-12	D	NDDD
Ebf1	1309.92	-0.237499	0.440876	N	-0.647503	0.0021347	D	-0.825299	3.62e-05	D	-0.671064	0.000975167	D	NDDD
Adrb3	1781.27	-0.698473	0.281669	N	-1.79254	0.000104731	D	-3.22085	2.87e-14	D	-1.82661	4.57e-05	D	NDDD
Arl4a	1905.11	-0.582727	0.00217375	N	-1.17433	2.23e-13	D	-1.10462	4.66e-12	D	-1.62737	8.2e-26	D	NDDD
Mtus1	2130.59	-0.568728	0.000235123	N	-0.978883	5.95e-13	D	-0.934394	5.39e-12	D	-0.899649	2.9e-11	D	NDDD
Sh3pxd2a	2289.02	0.361554	0.368768	N	-1.18701	1.22e-05	D	-1.61935	2.89e-10	D	-0.670459	0.0218175	D	NDDD
Vim	2335.01	-0.367694	0.182825	N	-1.24135	1.16e-10	D	-1.69329	9.33e-20	D	-2.61593	8.73e-47	D	NDDD
Ghr	2604.34	-0.369108	0.122201	N	-0.608054	0.00135226	D	-0.857375	1.21e-06	D	-1.09154	1.56e-10	D	NDDD
Pde3b	3039.57	-0.395107	0.116791	N	-0.76532	8.51e-05	D	-0.909233	1.11e-06	D	-1.59634	1.1e-19	D	NDDD
Mmd	3807.88	-0.501876	0.0143946	N	-1.08595	4.63e-11	D	-1.34844	4.02e-17	D	-2.20311	2.28e-45	D	NDDD
Nfil3	194.822	-1.4421	0.0635747	N	-2.71642	1.12e-05	D	-1.85123	0.00441209	D	-0.722037	0.359794	N	NDDN	YES	3	-27734	-22338	8828
Pgd	2724.02	-0.205181	0.575111	N	-0.721557	0.00220988	D	-0.713183	0.00225755	D	0.434739	0.0868593	N	NDDN	YES	1	16191
Sh3tc1	31.8929	-0.511398	0.219948	N	-0.702352	0.0422185	D	-0.827696	0.0186487	D	-0.65391	0.0567642	N	NDDN	YES	1	18781
Nrp2	979.087	-0.290592	0.382464	N	-0.670469	0.00486004	D	-0.771303	0.000788793	D	-0.220914	0.458266	N	NDDN	YES	1	21674
Acly	14697.8	-0.63941	0.2396	N	-1.4856	0.000172675	D	-1.07826	0.00938165	D	-0.446416	0.371971	N	NDDN	YES	1	22836
Dtx2	47.8919	-0.21646	0.611827	N	-1.08316	8.66e-05	D	-1.40427	8.71e-07	D	-0.436229	0.15704	N	NDDN	YES	1	24116
Baiap2	54.4089	0.382536	0.308863	N	-0.940711	0.00155647	D	-0.981324	0.00136125	D	0.367849	0.254773	N	NDDN	YES	1	6144
Chd4	753.389	-0.336398	0.0162664	N	-0.758008	2.02e-11	D	-0.681645	2.57e-09	D	-0.00513016	0.982269	N	NDDN	YES	1	626
Zfp740	108.014	-0.220561	0.505408	N	-0.859794	9.07e-05	D	-0.617078	0.00828808	D	-0.0770899	0.822227	N	NDDN	YES	1	-14804
Egr3	32.7806	-1.12125	0.322019	N	-2.90289	0.00049297	D	-2.60774	0.00194368	D	-1.09086	0.254834	N	NDDN	YES	1	-19308
Sh3pxd2b	77.7838	0.162756	0.684314	N	-0.925705	0.000207951	D	-0.862012	0.000817524	D	-0.098609	0.791745	N	NDDN	YES	1	-20922
Hist1h1e	38.9271	0.0247668	0.978014	N	-0.9235	0.0298391	D	-1.27185	0.00260362	D	0.535717	0.217816	N	NDDN	YES	1	-575
S100a10	1955.23	-0.330121	0.250874	N	-0.751724	0.000351062	D	-0.807693	8.07e-05	D	-0.0543507	0.87706	N	NDDN	YES	1	-7488
Cenpl	11.3657	-0.697259	0.261387	N	-1.42829	0.00526641	D	-1.42594	0.00855363	D	-0.816599	0.119059	N	NDDN
Fap	12.1154	-0.418796	0.520383	N	-1.02348	0.0389277	D	-1.22076	0.0206288	D	-0.295931	0.615174	N	NDDN
Lgi1	12.7451	-0.979985	0.0618084	N	-1.20237	0.00955799	D	-1.57958	0.00149928	D	-0.78113	0.0999684	N	NDDN
Rfc3	15.696	-0.860241	0.0863127	N	-1.53787	0.000416294	D	-1.40456	0.00207391	D	-0.659319	0.148976	N	NDDN
Hist1h2ac	15.8129	0.00489994	0.995221	N	-1.10022	0.018394	D	-1.3186	0.00750592	D	-0.253397	0.658478	N	NDDN
Asxl3	16.6814	-0.353448	0.59044	N	-1.27118	0.0069818	D	-1.31402	0.00846487	D	0.300311	0.580303	N	NDDN
Rad18	18.761	-0.450961	0.504	N	-1.10385	0.0264898	D	-1.24958	0.0146675	D	-0.389585	0.505165	N	NDDN
Mbnl3	20.1336	-0.425023	0.410626	N	-0.976244	0.013037	D	-0.975445	0.0184848	D	-0.757712	0.0572386	N	NDDN
Pcgf6	21.5335	-0.652973	0.147043	N	-0.846323	0.0274879	D	-0.838771	0.0389063	D	-0.251287	0.590976	N	NDDN
Zfp677	22.4994	-0.75844	0.0646012	N	-0.948765	0.00812494	D	-1.04702	0.00524218	D	-0.508781	0.186777	N	NDDN
Gm26616	24.8277	-0.404345	0.435957	N	-0.83504	0.0334051	D	-1.34097	0.000722269	D	-0.583622	0.15351	N	NDDN
Gm16284	25.0113	-0.63943	0.120458	N	-0.985762	0.00445631	D	-1.36684	0.000162409	D	-0.45631	0.232615	N	NDDN
Prr5	25.0238	-0.602013	0.119337	N	-1.11269	0.000644087	D	-1.12129	0.0011532	D	-0.0282353	0.959701	N	NDDN
Gm49463	26.0569	-0.380943	0.52171	N	-1.07577	0.0112132	D	-0.998209	0.0242506	D	-0.530789	0.255718	N	NDDN
Ago4	26.0986	-0.74353	0.0775613	N	-1.08721	0.00258762	D	-0.783147	0.0449621	D	-0.26958	0.547333	N	NDDN
Fancc	26.1409	-0.564371	0.166931	N	-0.967964	0.00386583	D	-0.847668	0.0171331	D	-0.579093	0.0988841	N	NDDN
Ralgps2	27.9273	-1.04001	0.0550194	N	-1.06313	0.0279552	D	-1.05507	0.0335313	D	-0.536712	0.318391	N	NDDN
Gm26528	27.9589	-0.521694	0.204959	N	-0.892402	0.00744055	D	-0.762192	0.0322683	D	-0.66197	0.0520344	N	NDDN
2610035D17Rik	30.8556	-0.0859811	0.916176	N	-1.34489	0.00141718	D	-0.911358	0.0444893	D	-0.0296391	0.968424	N	NDDN
Dse	31.22	-0.69867	0.0731725	N	-0.848182	0.0122619	D	-1.15916	0.000759939	D	-0.48989	0.178595	N	NDDN
Klf16	32.2665	-0.386819	0.341448	N	-0.843317	0.00701963	D	-0.685506	0.0423343	D	-0.230029	0.552876	N	NDDN
Rexo5	34.8542	-0.330431	0.475242	N	-0.729057	0.0333136	D	-0.724835	0.0429427	D	-0.379508	0.316996	N	NDDN
St6galnac3	35.7447	0.0629237	0.91177	N	-0.773962	0.00998463	D	-0.968589	0.00177195	D	-0.446467	0.166689	N	NDDN
Snhg11	37.284	-0.222095	0.747143	N	-1.06183	0.0135126	D	-1.20583	0.00522303	D	-0.629507	0.173197	N	NDDN
Nek6	38.1241	-0.264583	0.5323	N	-0.79578	0.00797566	D	-1.48792	2.46e-06	D	0.484401	0.0938262	N	NDDN
Npas2	39.3089	-0.815076	0.495723	N	-4.42623	8.5e-08	D	-4.47952	1.54e-07	D	-0.468722	0.673092	N	NDDN
Wdr19	39.3609	-0.576041	0.0917792	N	-1.0006	0.000446159	D	-1.09292	0.000212983	D	-0.366081	0.261595	N	NDDN
Rnf182	39.5787	-0.210663	0.728402	N	-0.94032	0.0147315	D	-1.38457	0.000293527	D	-0.186798	0.714822	N	NDDN
Pak4	40.0721	-0.0662753	0.911215	N	-0.638495	0.0458665	D	-0.720389	0.0283112	D	0.0427229	0.931602	N	NDDN
Ssh3	40.2803	-0.0523593	0.924015	N	-0.706299	0.0145792	D	-0.751629	0.0122936	D	-0.290635	0.383487	N	NDDN
6330403L08Rik	40.686	-0.4339	0.233463	N	-0.75625	0.00900206	D	-1.17042	6.56e-05	D	-0.380047	0.236823	N	NDDN
Arhgap19	40.8606	0.356819	0.463007	N	-1.12258	0.00151162	D	-1.38654	0.000121198	D	-0.717306	0.0510443	N	NDDN
Pdcd7	41.373	-0.503588	0.117663	N	-0.71792	0.00804294	D	-0.680097	0.0173369	D	-0.262998	0.410361	N	NDDN
Galnt18	41.7014	-0.0825905	0.911215	N	-0.7893	0.044436	D	-1.04163	0.00693672	D	-0.476628	0.260174	N	NDDN
Caprin2	43.1981	-0.469217	0.2804	N	-0.791553	0.0215473	D	-1.09684	0.0012817	D	-0.222439	0.608909	N	NDDN
Matn2	43.2076	-0.391067	0.260695	N	-0.850632	0.0016529	D	-0.635648	0.0296417	D	-0.253544	0.437481	N	NDDN
Lnpk	43.461	-0.42714	0.166702	N	-0.71799	0.00426124	D	-0.692898	0.00877796	D	-0.372797	0.174822	N	NDDN
Faim	43.9094	-0.387046	0.306384	N	-0.796106	0.00635452	D	-0.703019	0.0223788	D	-0.403505	0.209749	N	NDDN
Wrb	44.653	-0.297508	0.397043	N	-0.867766	0.00076112	D	-0.682378	0.013276	D	-0.296267	0.324979	N	NDDN
Rfx3	44.9421	-0.128181	0.783388	N	-1.04799	0.000125335	D	-0.740234	0.0113151	D	-0.219666	0.526935	N	NDDN
Inpp4b	46.3106	-0.270198	0.614489	N	-0.915068	0.0106182	D	-0.980727	0.00694488	D	-0.285175	0.519718	N	NDDN
Phf1	47.381	-0.190211	0.65371	N	-0.87227	0.00138126	D	-0.851602	0.00266093	D	-0.120584	0.752136	N	NDDN
Junb	50.3656	-0.206768	0.719355	N	-0.750997	0.0467816	D	-0.858926	0.0226292	D	-0.535278	0.175121	N	NDDN
Garnl3	53.081	-0.658145	0.120143	N	-1.08658	0.00164526	D	-0.910464	0.0112468	D	-0.56672	0.132694	N	NDDN
Srgap1	55.2732	-0.127811	0.735057	N	-0.637502	0.00691889	D	-1.1483	1.51e-06	D	-0.396767	0.114359	N	NDDN
Dlg5	56.3644	-0.575882	0.0483219	N	-0.716405	0.00475407	D	-0.805898	0.00181159	D	-0.519806	0.0472515	N	NDDN
Tsga10	59.1926	-0.33656	0.36384	N	-0.677196	0.0156881	D	-0.848379	0.00236713	D	-0.530536	0.0640611	N	NDDN
Zfp277	63.9704	-0.55387	0.0844292	N	-0.96864	0.000232999	D	-0.631115	0.0272076	D	-0.461358	0.110204	N	NDDN
Pold4	65.2969	-0.135778	0.751682	N	-0.699632	0.00804381	D	-0.845929	0.00149076	D	0.173185	0.604282	N	NDDN
Spidr	68.3547	-0.127101	0.708557	N	-0.614235	0.0041101	D	-1.03322	1.6e-06	D	-0.291156	0.226423	N	NDDN
Rp2	72.5417	-0.485116	0.185288	N	-0.925331	0.0012297	D	-0.763487	0.0106499	D	-0.495332	0.111746	N	NDDN
Naf1	73.1363	-0.463892	0.0549403	N	-1.00628	4.42e-07	D	-0.800722	0.000127696	D	-0.319189	0.163905	N	NDDN
Sesn2	73.2381	-0.560567	0.334094	N	-1.07202	0.0146837	D	-1.16314	0.0074016	D	-0.747423	0.103052	N	NDDN
Nipsnap1	75.732	-0.18142	0.666236	N	-0.699818	0.00957593	D	-0.687147	0.0132657	D	-0.291192	0.356884	N	NDDN
Wsb1	86.089	-0.357948	0.164262	N	-0.632874	0.00196703	D	-0.722544	0.000506443	D	-0.315223	0.166082	N	NDDN
Tdrkh	88.2052	-0.329484	0.301793	N	-0.800463	0.000712524	D	-0.614885	0.0142444	D	-0.459234	0.0695907	N	NDDN
Col5a3	88.4589	-0.14888	0.791657	N	-1.11172	0.000443788	D	-1.89103	1.67e-09	D	0.330495	0.386899	N	NDDN
Hykk	90.0721	-0.31471	0.506222	N	-0.91042	0.00502982	D	-0.963822	0.00292956	D	-0.480875	0.180653	N	NDDN
Fam122b	91.5921	-0.342682	0.247272	N	-0.634861	0.00575168	D	-0.607428	0.0102657	D	-0.45725	0.0550024	N	NDDN
Fchsd2	91.8207	-0.495867	0.0289908	N	-0.850127	9.85e-06	D	-0.693855	0.000572962	D	-0.473932	0.0196857	N	NDDN
Klhl25	95.5536	-0.829585	0.0922883	N	-1.27548	0.00161489	D	-0.984012	0.0203399	D	-0.513853	0.278265	N	NDDN
Arntl	95.7452	-0.828165	0.422852	N	-3.28599	1.97e-06	D	-2.75841	7.65e-05	D	0.127092	0.916628	N	NDDN
Appl2	96.0388	-0.317356	0.14602	N	-0.800216	2.14e-06	D	-0.667909	0.000164817	D	-0.5063	0.00363212	N	NDDN
Nqo1	96.4275	-0.315128	0.5529	N	-0.872594	0.0165889	D	-0.988538	0.00577336	D	-0.215693	0.650326	N	NDDN
Lsm10	98.7263	-0.368636	0.206707	N	-1.0802	5.45e-07	D	-1.18022	7.63e-08	D	-0.507116	0.0295579	N	NDDN
Psmd10	101.304	-0.232962	0.397043	N	-0.666856	0.000672894	D	-0.650972	0.00124118	D	-0.396869	0.057291	N	NDDN
D030056L22Rik	101.737	-0.216509	0.53794	N	-0.629596	0.00893198	D	-0.634782	0.00964358	D	-0.356817	0.17647	N	NDDN
Trp53bp1	102.433	-0.265187	0.349682	N	-0.825041	3.96e-05	D	-1.40371	4.54e-12	D	-0.514288	0.0140483	N	NDDN
Thbs1	103.059	-0.468569	0.70106	N	-2.36808	0.00122516	D	-2.63143	0.00024473	D	-0.256515	0.821016	N	NDDN
Rdh11	104.496	-0.351242	0.322019	N	-0.827341	0.00150202	D	-0.85897	0.00106387	D	0.0194223	0.968115	N	NDDN
Fer1l6	110.93	-0.26887	0.8067	N	-1.77146	0.00364778	D	-1.73843	0.0043207	D	0.723027	0.306954	N	NDDN
Gcnt2	114.417	-0.357947	0.362985	N	-0.794038	0.00593939	D	-0.67147	0.0253883	D	-0.580678	0.0513767	N	NDDN
Med30	119.717	-0.435517	0.203415	N	-0.628979	0.0229644	D	-0.61887	0.0275201	D	-0.360756	0.234932	N	NDDN
Mical2	124.949	-0.356927	0.107661	N	-0.645046	0.000305678	D	-0.605222	0.00101504	D	-0.238758	0.255825	N	NDDN
Hebp1	125.603	-0.157444	0.698326	N	-0.641421	0.012029	D	-0.635816	0.0142859	D	-0.0708833	0.855965	N	NDDN
Far1	131.81	-0.292778	0.325448	N	-0.661522	0.00258083	D	-0.610436	0.00676486	D	-0.313025	0.208803	N	NDDN
Ube2e2	140.932	-0.365595	0.244596	N	-0.784982	0.000878208	D	-0.902704	0.00010733	D	-0.522031	0.034528	N	NDDN
Nap1l1	144.337	-0.209523	0.443368	N	-0.784972	1.86e-05	D	-0.916482	6.22e-07	D	-0.369023	0.0678735	N	NDDN
Dop1b	146.373	-0.296926	0.231277	N	-0.628137	0.00082488	D	-0.925587	4.33e-07	D	-0.391823	0.0491634	N	NDDN
Slc5a3	163.184	-0.480916	0.306273	N	-1.34947	5.54e-05	D	-0.864176	0.0162753	D	0.000457523	0.999271	N	NDDN
Pir	164.263	-0.250525	0.638541	N	-0.720194	0.043272	D	-1.41434	9.29e-06	D	0.385904	0.326931	N	NDDN
Zfyve26	166.159	-0.320044	0.289835	N	-0.675217	0.00277537	D	-0.621577	0.0070323	D	-0.485365	0.0381763	N	NDDN
Fbxl5	178.351	-0.578257	0.00670961	N	-0.750459	7.6e-05	D	-0.601647	0.00229306	D	-0.18655	0.444286	N	NDDN
Uba6	186.525	-0.561782	0.00492437	N	-0.94379	4.9e-08	D	-0.638494	0.000484356	D	-0.539051	0.00302957	N	NDDN
Fbxo22	201.72	-0.471812	0.101481	N	-0.935236	3.62e-05	D	-1.05801	2.1e-06	D	-0.219236	0.458785	N	NDDN
Gga2	213.171	-0.516318	2.93e-05	N	-0.718219	4.54e-10	D	-0.660736	2.97e-08	D	-0.568966	9.57e-07	N	NDDN
Polr3k	224.416	-0.419624	0.144845	N	-0.853649	0.000112438	D	-0.781929	0.000483085	D	-0.500012	0.0344372	N	NDDN
Grk5	250.402	-0.390747	0.0607146	N	-1.21543	3.3e-14	D	-0.94302	8.99e-09	D	-0.00132828	0.996718	N	NDDN
Gm4204	258.972	-0.254497	0.219269	N	-0.628248	3.9e-05	D	-1.09396	1.3e-13	D	-0.57648	0.00013262	N	NDDN
Spryd7	272.913	-0.35071	0.187221	N	-0.63954	0.00184505	D	-0.6045	0.00358855	D	-0.404115	0.0645253	N	NDDN
Errfi1	332.857	-0.489248	0.501716	N	-1.06547	0.0399904	D	-1.10799	0.0304258	D	-0.35367	0.586276	N	NDDN
Fndc3b	370.019	-0.425428	0.00873801	N	-1.0235	1.78e-14	D	-0.789579	7.99e-09	D	-0.498849	0.0004134	N	NDDN
Ttc28	371.595	-0.033819	0.952842	N	-0.650141	0.0153293	D	-1.21952	4.05e-07	D	-0.596901	0.0242529	N	NDDN
Ccn1	380.876	-0.397608	0.693771	N	-1.38172	0.0319998	D	-1.56693	0.0117124	D	-1.03753	0.119663	N	NDDN
4932438A13Rik	394.47	-0.290669	0.151916	N	-0.644861	2.55e-05	D	-0.650712	2.08e-05	D	-0.293412	0.0884353	N	NDDN
9930021J03Rik	501.722	-0.577494	0.00100199	N	-0.62216	0.000134092	D	-0.678907	2.22e-05	D	-0.454784	0.00652761	N	NDDN
Plgrkt	532.781	-0.377104	0.0187888	N	-0.613902	5.08e-06	D	-0.702383	1.1e-07	D	-0.447659	0.00113976	N	NDDN
Clock	633.244	-0.208864	0.506609	N	-0.706769	0.00061462	D	-0.927602	2.19e-06	D	-0.03398	0.925114	N	NDDN
Ptbp3	674.466	-0.577673	5.09e-10	N	-0.759333	1.38e-17	D	-0.622807	7.75e-12	D	-0.491076	6.72e-08	N	NDDN
Clpx	795.115	-0.573027	2.81e-05	N	-0.789817	3.26e-10	D	-0.865764	3.45e-12	D	-0.380578	0.00525444	N	NDDN
Cpeb4	887.703	-0.402242	0.219569	N	-0.666801	0.00886147	D	-0.943313	6.85e-05	D	-0.400209	0.149252	N	NDDN
Ntrk3	987.25	-0.202266	0.824054	N	-1.14575	0.0257758	D	-1.23382	0.0137415	D	-0.304234	0.649603	N	NDDN
Rps6ka3	1379.65	-0.590851	0.000373505	N	-0.715838	2.57e-06	D	-0.826495	2.22e-08	D	-0.479229	0.00242211	N	NDDN
Pde4d	1460.15	-0.248541	0.724672	N	-0.941835	0.0340906	D	-1.05548	0.0140524	D	-0.54196	0.269403	N	NDDN
Rgs2	2985.79	-0.450052	0.423304	N	-1.0005	0.0125159	D	-0.933106	0.0207642	D	-0.74128	0.0737245	N	NDDN
Dtx4	160.785	-0.121322	0.846811	N	-1.70803	5.96e-08	D	-1.64933	2.17e-07	D	1.11385	0.000310331	U	NDDU
Skil	385.106	0.0053901	0.991911	N	-0.788503	0.00184505	D	-0.41477	0.156624	N	-0.616955	0.0166533	D	NDND	YES	2	713	12882
Clec2d	346.1	-0.221048	0.649415	N	-0.801948	0.0090062	D	-0.38801	0.29097	N	-0.859781	0.00354242	D	NDND	YES	1	-368
Gm37589	10.5491	-1.10751	0.356419	N	-2.7201	0.004507	D	-0.195657	0.896403	N	-1.91629	0.0411456	D	NDND
Cetn4	10.6346	-0.510148	0.463155	N	-1.16068	0.0310931	D	-0.675442	0.267817	N	-1.53377	0.004211	D	NDND
Mecomos	11.5447	-0.507752	0.44196	N	-1.13405	0.0265565	D	-0.734181	0.195564	N	-1.72634	0.00081193	D	NDND
Gm37973	12.3044	-0.303444	0.659421	N	-1.16685	0.0155815	D	-0.851678	0.10619	N	-1.10224	0.021296	D	NDND
Gm38253	15.0169	-0.757507	0.120568	N	-1.45006	0.000587884	D	-0.765368	0.0962917	N	-0.925176	0.0271191	D	NDND
Gm7846	15.931	-0.827467	0.159088	N	-1.36434	0.00542175	D	-0.670951	0.231379	N	-1.20005	0.013566	D	NDND
Spin4	17.0077	-0.177967	0.819475	N	-1.00178	0.0376705	D	-0.521971	0.355846	N	-1.07352	0.0228932	D	NDND
Tbc1d2	21.3349	-0.667938	0.111272	N	-0.851453	0.0185034	D	-0.725182	0.0625823	N	-1.14992	0.00108333	D	NDND
Gm45222	21.3747	-0.47087	0.366943	N	-1.15831	0.00387064	D	-0.192202	0.745625	N	-1.29088	0.00109852	D	NDND
Glmn	21.8961	-0.745327	0.077315	N	-1.01257	0.00556713	D	-0.454276	0.295686	N	-1.07014	0.00294806	D	NDND
Gm20281	23.3419	-0.441864	0.322131	N	-0.99392	0.00433387	D	-0.565499	0.15287	N	-0.812324	0.0201756	D	NDND
Chrna1os	33.7447	-0.770442	0.122249	N	-0.973382	0.021753	D	-0.644412	0.170639	N	-0.910964	0.0296014	D	NDND
2210408I21Rik	34.7247	-0.547472	0.164896	N	-0.662944	0.0480227	D	-0.29162	0.487382	N	-0.778933	0.0155481	D	NDND
Ap3s1-ps1	37.0276	-0.35111	0.40321	N	-0.667931	0.0383339	D	-0.579338	0.0934606	N	-0.856668	0.00521855	D	NDND
5930430L01Rik	39.0328	-0.528193	0.202765	N	-0.997495	0.00233344	D	-0.326349	0.439334	N	-1.25232	8.43e-05	D	NDND
Tmem237	39.7412	-0.262901	0.553506	N	-0.677164	0.0323635	D	-0.563611	0.0985685	N	-1.00847	0.000717224	D	NDND
Armcx2	40.7971	-0.606416	0.0517127	N	-0.846728	0.00165014	D	-0.588873	0.0457042	N	-0.675764	0.0127779	D	NDND
Gm7308	44.6739	-0.251615	0.535878	N	-0.832964	0.00306356	D	-0.24992	0.506045	N	-0.8856	0.00132139	D	NDND
D830026I12Rik	47.1053	-0.589954	0.189366	N	-0.786397	0.03444	D	-0.728394	0.0593745	N	-1.23723	0.000312924	D	NDND
Hpgd	48.9087	-0.380123	0.485715	N	-0.94166	0.0153435	D	-0.502	0.267736	N	-0.880353	0.0217712	D	NDND
Lrrn4	50.9941	-0.630406	0.0896667	N	-1.185	9.11e-05	D	-0.576868	0.0949758	N	-1.18976	6.35e-05	D	NDND
Tmem98	55.1113	-0.457265	0.235579	N	-0.669773	0.0319998	D	-0.575729	0.0826491	N	-0.696149	0.0219095	D	NDND
Nat2	57.1937	-0.559018	0.135788	N	-1.00107	0.000878374	D	-0.586094	0.0817629	N	-1.03051	0.000458546	D	NDND
Rpl22l1	57.4704	-0.552572	0.081302	N	-0.920517	0.000453368	D	-0.294904	0.380683	N	-0.796394	0.00231855	D	NDND
Cep70	57.6506	-0.674055	0.0871414	N	-0.849883	0.0112049	D	-0.687919	0.0532123	N	-1.15721	0.000247338	D	NDND
Ggct	59.1322	-0.294902	0.464753	N	-0.852473	0.0026613	D	-0.276622	0.456461	N	-0.623533	0.0322518	D	NDND
Fam151b	59.167	-0.337752	0.339298	N	-0.615281	0.0244127	D	-0.551471	0.0558117	N	-0.765126	0.00322503	D	NDND
Ptprs	60.3574	-0.530791	0.18127	N	-0.847732	0.00768557	D	-0.52641	0.141339	N	-0.78657	0.0124065	D	NDND
Tspan6	74.9033	-0.318011	0.193836	N	-0.686036	0.00030486	D	-0.593172	0.00302527	N	-0.835563	6.65e-06	D	NDND
Ogfrl1	76.4473	-0.491807	0.0645374	N	-0.780189	0.000448041	D	-0.367337	0.160388	N	-0.73068	0.000886017	D	NDND
Fbxo25	85.7171	-0.340453	0.23323	N	-0.791702	0.00025174	D	-0.495316	0.0377247	N	-0.617974	0.00464739	D	NDND
Fabp5	90.1768	-0.582821	0.184077	N	-0.773107	0.032317	D	-0.640917	0.0929901	N	-1.06241	0.00144245	D	NDND
Hmgn5	93.0538	-0.218038	0.637922	N	-0.679645	0.0266789	D	-0.362609	0.316796	N	-0.653908	0.0298617	D	NDND
Ropn1l	96.1071	-0.332905	0.353917	N	-0.677568	0.0113648	D	-0.532046	0.0630278	N	-1.43621	4.48e-09	D	NDND
Ppp1r21	107.057	-0.0907635	0.778609	N	-0.64956	0.000443427	D	-0.586406	0.00228357	N	-0.607966	0.000891045	D	NDND
Klhl28	109.495	-0.508601	0.0348125	N	-0.654984	0.00168215	D	-0.572717	0.00828933	N	-0.609012	0.00315936	D	NDND
Akip1	118.471	-0.261241	0.273235	N	-0.609823	0.000623533	D	-0.562584	0.0022791	N	-0.865001	3.77e-07	D	NDND
Aspn	126.104	-0.646312	0.0533733	N	-0.691856	0.0190705	D	-0.333363	0.348734	N	-0.633157	0.0302845	D	NDND
Nfkbiz	129.582	-0.211844	0.628606	N	-0.958083	0.000431516	D	-0.326223	0.34708	N	-1.05439	5.92e-05	D	NDND
Tbc1d19	136.362	-0.39037	0.144845	N	-0.68031	0.00135756	D	-0.522625	0.0203875	N	-0.63272	0.00253647	D	NDND
Tut4	144.67	-0.39084	0.0619322	N	-0.668921	9.66e-05	D	-0.587592	0.000941066	N	-0.702518	2.83e-05	D	NDND
1810026B05Rik	162.748	-0.450102	0.00771843	N	-0.671647	5.51e-06	D	-0.35665	0.0325723	N	-0.851405	3.43e-09	D	NDND
Mthfd2l	169.899	-0.665216	0.0608671	N	-0.64379	0.0433094	D	-0.418322	0.240271	N	-0.70041	0.0212834	D	NDND
Gm4540	176.487	-0.353701	0.251267	N	-0.703525	0.00257678	D	-0.498346	0.0481885	N	-0.806479	0.000300502	D	NDND
Ttc25	191.147	-0.744572	0.226586	N	-1.15678	0.017409	D	-0.435862	0.486593	N	-1.03169	0.0327346	D	NDND
Myo9a	200.18	-0.438866	0.00893014	N	-0.708847	9.27e-07	D	-0.506004	0.000952116	N	-0.601844	3.17e-05	D	NDND
Nras	239.834	-0.22929	0.150695	N	-0.646105	5.27e-08	D	-0.509027	4.31e-05	N	-0.626918	1.05e-07	D	NDND
Rnf217	295.454	-0.496786	0.0309821	N	-0.6532	0.000951702	D	-0.446295	0.0367439	N	-0.798207	2.08e-05	D	NDND
Fbp2	334.321	-0.552049	0.0966525	N	-0.695123	0.0132031	D	-0.116564	0.791048	N	-1.02575	5.98e-05	D	NDND
Sub1	348.62	-0.51178	0.0689475	N	-0.874327	0.000111077	D	-0.428634	0.102348	N	-1.03112	1.86e-06	D	NDND
Ttc30b	357.179	-0.418257	0.301874	N	-0.738571	0.0171388	D	-0.187949	0.670693	N	-0.964305	0.000764406	D	NDND
Acot2	479.373	-0.392506	0.22559	N	-0.808391	0.000857649	D	-0.358534	0.21818	N	-1.37899	4.71e-10	D	NDND
Negr1	486.347	-0.243273	0.272393	N	-0.750639	1.33e-06	D	-0.498614	0.00247695	N	-0.974673	5.76e-11	D	NDND
Crebrf	508.801	-0.0590533	0.897799	N	-0.624789	0.00608856	D	-0.353859	0.173435	N	-0.635527	0.0039331	D	NDND
Cd1d1	624.843	-0.425612	0.112637	N	-0.60476	0.00599333	D	-0.589711	0.00718564	N	-0.955509	1.62e-06	D	NDND
Utrn	735.83	-0.352608	0.140984	N	-0.608329	0.00121576	D	-0.554813	0.0034227	N	-0.769328	1.31e-05	D	NDND
Sowahc	971.155	-0.556499	0.00449766	N	-0.646562	0.000253377	D	-0.426211	0.0252151	N	-0.801519	1.54e-06	D	NDND
Abca1	1590.5	-0.423383	0.176167	N	-0.631828	0.0112483	D	-0.356467	0.212283	N	-1.95389	2.02e-20	D	NDND
Rbp4	1602.33	0.0406451	0.944546	N	-0.674201	0.0145933	D	-0.467837	0.120137	N	-1.64593	3.15e-12	D	NDND
Mpzl2	1683.55	-0.428922	0.0239109	N	-0.604478	0.000176762	D	-0.308927	0.0956725	N	-1.04292	1.5e-12	D	NDND
Sh3bgrl	3166.62	-0.519597	0.0769153	N	-0.607331	0.0157177	D	-0.327336	0.263899	N	-0.831517	0.000299499	D	NDND
Echdc1	4075.83	-0.559512	0.100155	N	-0.776387	0.00569124	D	-0.383771	0.247403	N	-0.831095	0.00197052	D	NDND
Scd1	263620	-0.0287983	0.978649	N	-1.09634	0.0375961	D	0.202569	0.802535	N	0.420861	0.511781	N	NDNN	YES	4	-14642	-8702	17949	18968
Hemk1	135.803	-0.160378	0.617956	N	-0.692452	0.000675374	D	-0.38906	0.0933177	N	0.000474983	0.999059	N	NDNN	YES	3	12931	14701	25568
Plin2	4564.02	-0.30727	0.262562	N	-0.612039	0.00279303	D	-0.518267	0.0135092	N	0.150992	0.581272	N	NDNN	YES	3	-25143	-16135	12840
Jade2	37.0521	-0.284002	0.476109	N	-0.61133	0.0403777	D	-0.104167	0.820363	N	-0.247001	0.477684	N	NDNN	YES	2	24171	25028
Mis18a	24.0285	-0.0897224	0.881046	N	-0.894396	0.00818598	D	-0.352729	0.399131	N	-0.389775	0.298916	N	NDNN	YES	2	-10757	-9678
Mif4gd	590.506	-0.0229015	0.92828	N	-0.661317	3.61e-09	D	-0.545255	2.14e-06	N	-0.580527	2.17e-07	N	NDNN	YES	2	-13615	-6781
Camk2n1	55.0547	-0.178446	0.713325	N	-0.758272	0.0144876	D	-0.512506	0.137668	N	-0.551865	0.0848095	N	NDNN	YES	2	-19257	-226
Tgfbr2	1624.83	-0.586291	0.0148062	N	-0.689227	0.00119556	D	-0.114521	0.731567	N	0.37312	0.110687	N	NDNN	YES	2	-3019	25643
Ntng2	46.0329	-0.308662	0.507244	N	-0.719339	0.0331719	D	-0.629032	0.0795773	N	-0.185324	0.666424	N	NDNN	YES	1	10104
Kbtbd13	15.5816	-0.977412	0.122249	N	-1.15448	0.0362776	D	-0.654365	0.299319	N	0.133074	0.862431	N	NDNN	YES	1	16275
Lox	226.358	-0.244491	0.522977	N	-0.768426	0.00268684	D	-0.574023	0.0353196	N	0.590741	0.0206246	N	NDNN	YES	1	20354
Ncan	21.622	0.0467151	0.967282	N	-1.4624	0.00895654	D	-0.918645	0.136909	N	-0.583379	0.35944	N	NDNN	YES	1	3607
Vps37b	40.916	-0.484465	0.143925	N	-0.720511	0.00884483	D	-0.434205	0.167712	N	-0.345177	0.261395	N	NDNN	YES	1	6183
Acaca	1267.16	-0.0832081	0.89889	N	-0.861557	0.00759852	D	-0.474245	0.20153	N	-0.119649	0.804128	N	NDNN	YES	1	6565
Atg9b	18.3513	-0.901561	0.111376	N	-1.07284	0.0299299	D	-0.0554477	0.947278	N	0.164704	0.799956	N	NDNN	YES	1	8592
Six5	46.603	-0.121076	0.794442	N	-0.7139	0.010335	D	-0.478172	0.126386	N	0.059186	0.888711	N	NDNN	YES	1	-10148
Me1	5858.35	-0.303815	0.410626	N	-0.889632	0.000393759	D	-0.32679	0.30128	N	0.455267	0.102438	N	NDNN	YES	1	-172
Slc38a10	453.14	-0.243223	0.407378	N	-0.715083	0.000382861	D	-0.550089	0.00879503	N	-0.167992	0.530765	N	NDNN	YES	1	-19963
Gprc5c	67.3536	-0.782662	0.111272	N	-1.10823	0.00654727	D	-0.749893	0.0926316	N	-0.606544	0.175146	N	NDNN	YES	1	-21699
Mllt3	116.661	-0.37171	0.252442	N	-0.672199	0.00754598	D	-0.421092	0.137692	N	0.15886	0.628227	N	NDNN	YES	1	-2389
Tspan14	371.53	-0.298242	0.140689	N	-0.654624	2.17e-05	D	-0.291953	0.10902	N	-0.151096	0.456114	N	NDNN	YES	1	-24673
Usp18	16.2205	-0.0907546	0.916056	N	-0.97811	0.0422462	D	-0.367548	0.547801	N	-0.682407	0.169887	N	NDNN	YES	1	-26296
Elovl5	2603.96	-0.350807	0.181565	N	-0.629848	0.00178167	D	-0.16881	0.54954	N	0.478826	0.020119	N	NDNN	YES	1	-6686
Gm8162	10.2859	-0.569958	0.491454	N	-1.33542	0.0378839	D	-0.372444	0.656492	N	-0.10389	0.909595	N	NDNN
Recql4	10.419	-0.723183	0.359093	N	-1.85801	0.00318565	D	-1.13024	0.0926968	N	-0.98396	0.12385	N	NDNN
Fbxo47	10.4214	-0.854794	0.223102	N	-1.38213	0.0190832	D	-1.22951	0.0500415	N	-0.41305	0.547333	N	NDNN
Unkl	10.6466	-0.684008	0.283263	N	-1.11249	0.0367807	D	-0.366586	0.590702	N	-0.783696	0.148774	N	NDNN
Nfe2l3	11.0219	-1.22331	0.0894716	N	-1.77047	0.00498369	D	-0.866123	0.217371	N	-0.901355	0.169292	N	NDNN
Plk4	11.3171	-0.354115	0.591724	N	-1.5141	0.00214807	D	-0.724847	0.180234	N	-0.827588	0.0918861	N	NDNN
Tmie	11.4158	-0.239148	0.853947	N	-1.88383	0.0228968	D	0.0861592	0.947093	N	0.985694	0.178595	N	NDNN
Lrrc3b	11.9631	-0.182997	0.841192	N	-1.3351	0.0198064	D	0.0897403	0.921179	N	-0.632532	0.298308	N	NDNN
Gm10433	12.3661	-0.411028	0.550695	N	-1.15845	0.0243947	D	-0.633837	0.280446	N	-0.658302	0.221861	N	NDNN
Avpr1a	12.4706	-0.217888	0.769434	N	-0.990946	0.0470493	D	-0.869432	0.109007	N	-0.127314	0.851096	N	NDNN
Mmp11	12.9915	-0.103976	0.906073	N	-1.17093	0.019977	D	-0.197381	0.785908	N	-0.456668	0.410565	N	NDNN
Hist1h4i	13.3991	-0.0164524	0.986284	N	-1.35689	0.0104048	D	-0.653822	0.280694	N	-0.373384	0.547333	N	NDNN
Ddah2	14.0321	-0.286575	0.647395	N	-0.990141	0.0251509	D	-0.864466	0.0704275	N	-0.793614	0.0741959	N	NDNN
Lrch2	14.1383	-0.239966	0.7296	N	-1.18517	0.011801	D	-0.489832	0.383159	N	-0.674917	0.168733	N	NDNN
3110045C21Rik	14.1793	-0.877114	0.19838	N	-1.14233	0.0488117	D	-0.0358151	0.970741	N	-0.0485853	0.957969	N	NDNN
Atad5	14.2797	0.149358	0.850305	N	-1.12635	0.0239205	D	-0.15879	0.832158	N	-0.546192	0.306458	N	NDNN
Cyp2r1	14.3101	-0.801783	0.116031	N	-1.34427	0.00271355	D	-0.840628	0.0841464	N	0.41887	0.346488	N	NDNN
Ddx60	14.5988	0.108355	0.911215	N	-1.10875	0.0441965	D	-0.334586	0.644507	N	-0.530218	0.377996	N	NDNN
Aplf	14.7887	-0.481856	0.435957	N	-1.06257	0.0261035	D	-0.885447	0.0858572	N	-0.289537	0.615358	N	NDNN
Gm3325	15.9001	-0.655024	0.358739	N	-1.41801	0.0105897	D	-0.600118	0.36295	N	-0.774784	0.187437	N	NDNN
Gm7004	16.117	-0.59334	0.312954	N	-1.1176	0.0177487	D	-0.842644	0.100222	N	-0.426162	0.425853	N	NDNN
Gm44243	16.2345	-0.0506841	0.958568	N	-1.35028	0.00657447	D	-0.983131	0.065867	N	-0.363939	0.538231	N	NDNN
Zfp934	16.3092	-0.697935	0.322131	N	-1.27272	0.02334	D	-0.77804	0.214167	N	-0.69055	0.251057	N	NDNN
Zfp873	17.5376	-0.206071	0.795252	N	-1.05231	0.0359598	D	-0.607111	0.290439	N	-0.350053	0.555942	N	NDNN
Cep72	17.7202	-0.689718	0.206707	N	-1.3127	0.00337931	D	-0.774815	0.117823	N	-0.332838	0.537483	N	NDNN
Ttc30a1	17.9662	-0.0853595	0.92668	N	-1.01986	0.0468332	D	-0.07892	0.926208	N	-0.392648	0.506102	N	NDNN
Lhx6	18.259	-0.362427	0.517825	N	-0.919134	0.0271803	D	-0.631173	0.173057	N	-0.571982	0.191015	N	NDNN
Gata6	19.7855	-0.447635	0.421886	N	-0.910826	0.034221	D	-0.354845	0.514992	N	-0.505861	0.275196	N	NDNN
Zc4h2	22.5777	-0.407042	0.395681	N	-0.962964	0.00890282	D	-0.719068	0.0745187	N	-0.122741	0.810368	N	NDNN
Bach2	22.6496	-0.136258	0.87035	N	-0.98347	0.0420031	D	-0.495231	0.38797	N	-0.422774	0.441823	N	NDNN
Plek	22.6842	0.284208	0.695193	N	-1.04386	0.0387536	D	-0.786676	0.153091	N	-0.0352948	0.966732	N	NDNN
D630045J12Rik	23.2571	-0.822945	0.0635747	N	-1.39078	0.000282897	D	-0.810909	0.051003	N	-0.474979	0.267332	N	NDNN
Slc35d2	23.3071	-0.444013	0.381563	N	-0.914642	0.0198204	D	-0.704624	0.100001	N	-0.303327	0.517598	N	NDNN
Ube2ql1	23.3753	-0.867322	0.215287	N	-2.16749	9.58e-05	D	-0.954722	0.1223	N	-0.514083	0.438773	N	NDNN
Gm49492	23.7662	-0.44058	0.531164	N	-1.17422	0.0196699	D	-0.785401	0.157169	N	-0.88358	0.0849711	N	NDNN
Zfp979	24.8894	-0.474011	0.334936	N	-0.903428	0.0195325	D	-0.486119	0.281165	N	-0.321348	0.479587	N	NDNN
Ifi44	25.8436	-0.141503	0.862545	N	-1.07186	0.0222822	D	-0.931491	0.0602516	N	-0.108623	0.875224	N	NDNN
Nim1k	26.5267	0.37207	0.439727	N	-0.885369	0.0216865	D	-0.216453	0.6871	N	-0.272874	0.557298	N	NDNN
Map2k6	27.9549	-1.20031	0.120863	N	-1.36425	0.0421795	D	-0.205854	0.841282	N	0.498563	0.521198	N	NDNN
Mapk8ip1	30.1525	-0.370204	0.452608	N	-1.00523	0.00549007	D	-0.653776	0.103274	N	0.0962782	0.855147	N	NDNN
Gm49024	30.3842	-0.536783	0.375371	N	-1.19266	0.00882389	D	-0.932617	0.0549023	N	-0.276714	0.636208	N	NDNN
4931440P22Rik	30.5324	-0.740141	0.0657554	N	-0.731566	0.0421795	D	-0.533429	0.179778	N	-0.419527	0.283521	N	NDNN
Pgap1	32.0293	-0.641125	0.0529286	N	-0.614001	0.0404436	D	-0.357579	0.309889	N	-0.524274	0.0826779	N	NDNN
Gm21781	32.1697	-0.337763	0.423509	N	-0.795071	0.011801	D	-0.229563	0.592894	N	-0.439549	0.197884	N	NDNN
Tcea1	32.2955	-0.394811	0.339659	N	-0.797847	0.01292	D	-0.361692	0.354062	N	-0.378856	0.289682	N	NDNN
Mcm6	32.3404	-0.436137	0.239471	N	-0.879694	0.00282493	D	-0.385947	0.275887	N	-0.401215	0.217541	N	NDNN
Thnsl2	34.2266	-0.253004	0.578284	N	-0.65034	0.0467746	D	-0.666559	0.051003	N	-0.555114	0.0918684	N	NDNN
Cdk5rap2	34.2786	-0.131526	0.803374	N	-0.703173	0.028732	D	-0.548414	0.120424	N	-0.196823	0.623478	N	NDNN
Hace1	35.3415	-0.550525	0.0900632	N	-0.878374	0.00137612	D	-0.578465	0.0565065	N	-0.424959	0.154573	N	NDNN
Lsm11	35.6834	-0.599805	0.142606	N	-0.992099	0.00346285	D	-0.0145694	0.981099	N	0.530593	0.107479	N	NDNN
Mnd1-ps	36.2214	-0.591637	0.203641	N	-0.859843	0.0240243	D	-0.634712	0.126939	N	-0.701117	0.0685027	N	NDNN
Pcdhb16	37.4695	-0.165369	0.769308	N	-0.722034	0.0436496	D	-0.137831	0.797091	N	-0.360129	0.368598	N	NDNN
Gm20337	37.7416	-0.507442	0.179338	N	-0.779719	0.0115527	D	-0.491274	0.159442	N	-0.49094	0.133236	N	NDNN
Dock10	38.2907	-0.350753	0.362613	N	-0.835102	0.00396839	D	-0.552619	0.0865352	N	-0.594497	0.0463441	N	NDNN
Fbxl7	39.2241	-0.547745	0.125904	N	-0.620687	0.0462721	D	-0.167109	0.702477	N	0.37785	0.22323	N	NDNN
Gm3571	39.272	-0.406117	0.347146	N	-0.800414	0.0169418	D	-0.120491	0.817178	N	0.568451	0.0698087	N	NDNN
Eif5a2	39.572	-0.389127	0.280847	N	-0.769271	0.00679634	D	-0.135831	0.751784	N	0.0254491	0.958066	N	NDNN
Pth1r	43.9268	-0.122959	0.878486	N	-1.01754	0.0208756	D	-0.72902	0.129554	N	0.00822942	0.991682	N	NDNN
Poli	44.0737	-0.172292	0.742592	N	-0.887115	0.00654769	D	-0.484859	0.196291	N	-0.290143	0.461338	N	NDNN
Nek1	44.3276	-0.555855	0.0555251	N	-0.640303	0.0122051	D	-0.403653	0.166164	N	-0.340033	0.225924	N	NDNN
Rnf125	50.0701	-0.486376	0.229193	N	-0.984903	0.00171597	D	-0.644766	0.0615247	N	-0.393102	0.277631	N	NDNN
Pclo	50.1201	-0.458389	0.337887	N	-1.02417	0.00466689	D	0.361589	0.409794	N	0.379879	0.350451	N	NDNN
Fam13c	52.242	-0.463772	0.170553	N	-0.849455	0.00164269	D	-0.416875	0.186437	N	-0.572523	0.0408164	N	NDNN
Pold3	52.6488	-0.107187	0.803629	N	-0.633489	0.01292	D	-0.442275	0.120553	N	-0.386524	0.157405	N	NDNN
Ccdc125	53.0653	-0.706935	0.0930547	N	-0.763176	0.0388592	D	-0.740932	0.0511543	N	-0.465568	0.242966	N	NDNN
Pdp1	53.5617	-0.542091	0.05734	N	-0.8751	0.000299565	D	-0.584778	0.0265896	N	-0.119948	0.721269	N	NDNN
Tyk2	53.6196	0.0260961	0.959381	N	-0.672928	0.0072177	D	-0.583925	0.0289651	N	-0.203637	0.510138	N	NDNN
E330009J07Rik	55.822	-0.474128	0.111757	N	-0.791146	0.00129173	D	-0.297745	0.331786	N	-0.404019	0.131951	N	NDNN
Pcdhb17	56.3718	-0.301871	0.455658	N	-0.648132	0.0302162	D	-0.414868	0.220834	N	-0.418177	0.189443	N	NDNN
Gm13502	57.4173	-0.612398	0.214141	N	-1.08743	0.00515443	D	-0.159506	0.794406	N	0.0685073	0.913074	N	NDNN
Tmem9	57.9158	-0.330072	0.3547	N	-0.625602	0.0220217	D	-0.50778	0.0851067	N	-0.34514	0.24988	N	NDNN
Lin9	58.2781	-0.408409	0.274876	N	-0.855101	0.00287769	D	-0.115915	0.799906	N	-0.444168	0.158358	N	NDNN
Gm12096	61.4623	-0.359038	0.346706	N	-0.64504	0.0286167	D	-0.358595	0.299395	N	-0.595194	0.04212	N	NDNN
Btrc	63.4002	-0.138149	0.697508	N	-0.600975	0.00814467	D	-0.530308	0.0283727	N	-0.336822	0.174458	N	NDNN
Uchl5	63.6136	-0.460652	0.129737	N	-0.74506	0.00273302	D	-0.542967	0.0448275	N	-0.304027	0.290767	N	NDNN
Zfp2	65.5491	-0.119106	0.791834	N	-0.60535	0.0265601	D	-0.296827	0.368306	N	-0.295137	0.339183	N	NDNN
Gm42892	65.6992	-0.269048	0.668002	N	-0.97717	0.0157031	D	-0.306787	0.574072	N	-0.659174	0.121732	N	NDNN
Gramd4	65.9755	-0.361448	0.252442	N	-0.6956	0.00467263	D	-0.442218	0.110689	N	0.0162755	0.97	N	NDNN
Nbea	66.6593	-0.332459	0.273267	N	-0.714562	0.00213584	D	-0.307744	0.27917	N	-0.156901	0.607804	N	NDNN
Hdgfl3	66.8927	-0.460557	0.0626034	N	-0.650195	0.00197111	D	-0.514071	0.0230309	N	-0.576427	0.00608123	N	NDNN
Smc4	68.2312	-0.284411	0.518133	N	-0.867348	0.00413183	D	-0.436237	0.218462	N	-0.52632	0.102385	N	NDNN
Malt1	68.2921	-0.630719	0.0686058	N	-0.715453	0.0177487	D	-0.171265	0.692549	N	-0.352426	0.300527	N	NDNN
Gulp1	68.7577	-0.402242	0.364125	N	-0.86495	0.00872071	D	-0.447654	0.247136	N	-0.230181	0.587498	N	NDNN
Wdr47	68.8991	-0.219405	0.516592	N	-0.600133	0.0116388	D	-0.4521	0.0829359	N	-0.328151	0.20977	N	NDNN
Snrpb2	70.2604	-0.215691	0.532405	N	-0.648797	0.00655549	D	-0.513309	0.0458957	N	-0.492469	0.0444963	N	NDNN
Cry1	70.4365	-1.25647	0.0922883	N	-1.93183	0.00170744	D	-0.388951	0.665468	N	0.368676	0.65685	N	NDNN
Vangl1	71.2096	-0.475982	0.1096	N	-0.650122	0.00919214	D	-0.322676	0.280446	N	-0.308928	0.274955	N	NDNN
Gucy1b1	71.3304	-0.457947	0.0692787	N	-0.62116	0.00382394	D	-0.456799	0.0523956	N	-0.171893	0.525875	N	NDNN
Gm15551	75.7693	-0.559587	0.206707	N	-1.17776	0.000523799	D	-0.701892	0.0615247	N	0.0150395	0.98019	N	NDNN
Ttbk2	75.8256	-0.259166	0.362985	N	-0.791534	0.000115921	D	-0.447585	0.0530672	N	-0.193017	0.455947	N	NDNN
Als2cl	80.2043	-0.374119	0.305525	N	-0.740985	0.00789827	D	-0.0421956	0.93368	N	0.0730472	0.864213	N	NDNN
Lix1l	83.2019	-0.260415	0.409866	N	-0.686727	0.00242045	D	-0.461917	0.0649928	N	-0.37086	0.134266	N	NDNN
Dcaf17	84.2749	-0.281403	0.33509	N	-0.699413	0.00120582	D	-0.31487	0.224776	N	-0.0898579	0.774954	N	NDNN
Rassf6	84.5371	-0.552271	0.0457041	N	-0.7188	0.00256709	D	-0.546481	0.0325097	N	-0.506682	0.0405649	N	NDNN
Psip1	86.3262	-0.441896	0.0859369	N	-0.718309	0.000704519	D	-0.443769	0.0606953	N	-0.309615	0.199315	N	NDNN
Xrcc4	88.4796	-0.533713	0.0894716	N	-0.603569	0.0266342	D	-0.575948	0.0401871	N	-0.46458	0.0964853	N	NDNN
Pmvk	90.8601	-0.240865	0.541502	N	-0.640291	0.020285	D	-0.105587	0.806512	N	0.401335	0.157314	N	NDNN
Zfp760	91.3279	-0.242076	0.517464	N	-0.703157	0.00632667	D	-0.315839	0.314746	N	-0.523697	0.0482975	N	NDNN
Tbc1d12	92.1603	-0.459334	0.0607894	N	-0.739356	0.00029211	D	-0.595425	0.00560143	N	-0.476677	0.0251687	N	NDNN
Fmnl2	93.9666	-0.364595	0.18127	N	-0.667849	0.00182712	D	-0.377278	0.125371	N	-0.251614	0.320293	N	NDNN
Cspp1	97.471	-0.242281	0.379363	N	-0.626933	0.00165014	D	-0.535488	0.0106499	N	-0.416778	0.0460565	N	NDNN
1300002E11Rik	97.8296	-0.533256	0.0183043	N	-0.646504	0.0012831	D	-0.280794	0.250343	N	-0.225837	0.348517	N	NDNN
Hnrnpa3	101.191	-0.258364	0.426442	N	-0.661133	0.00435661	D	0.0560463	0.888651	N	-0.343639	0.181295	N	NDNN
Carf	101.269	0.131517	0.728571	N	-0.642454	0.00664856	D	-0.346321	0.209777	N	-0.245674	0.38227	N	NDNN
Smc5	101.332	-0.464548	0.0427222	N	-0.632339	0.00133716	D	-0.383266	0.0850603	N	-0.217619	0.359794	N	NDNN
Eps8	104.401	0.185895	0.569497	N	-0.614361	0.00625017	D	-0.185393	0.545573	N	-0.231006	0.387864	N	NDNN
Sox5	106.386	-0.0665253	0.925603	N	-0.979443	0.00563356	D	-0.295795	0.536467	N	0.201227	0.670351	N	NDNN
Scai	108.091	-0.560046	0.012537	N	-0.760966	0.000113291	D	-0.451066	0.0398442	N	-0.303255	0.181083	N	NDNN
Fam102b	108.368	-0.327995	0.216758	N	-0.785937	8.99e-05	D	-0.12343	0.688052	N	-0.387821	0.0767685	N	NDNN
Rffl	111.795	-0.141067	0.713995	N	-0.60371	0.0126076	D	-0.445295	0.0917205	N	-0.241082	0.400608	N	NDNN
Map3k1	112.323	-0.221316	0.554188	N	-0.726836	0.00387064	D	-0.159565	0.663938	N	0.20539	0.513277	N	NDNN
Pou6f1	112.808	-0.531813	0.119128	N	-0.641708	0.0270103	D	-0.591519	0.0481885	N	-0.461282	0.127952	N	NDNN
Mecom	113.947	-0.356556	0.103797	N	-0.804792	3.67e-06	D	-0.223103	0.325174	N	-0.00952774	0.975967	N	NDNN
St8sia4	118.147	-0.309742	0.410983	N	-0.660861	0.0166761	D	-0.168757	0.667583	N	-0.413177	0.164324	N	NDNN
Dcbld2	120.091	-0.522265	0.0110534	N	-0.641873	0.000460973	D	-0.16314	0.524501	N	-0.134844	0.581744	N	NDNN
Kdm1b	121.642	-0.396072	0.207013	N	-0.726096	0.00288579	D	-0.402832	0.151271	N	-0.195215	0.533746	N	NDNN
Fnbp1l	126.085	-0.19902	0.478579	N	-0.61218	0.00146039	D	-0.356696	0.103249	N	-0.382107	0.0611483	N	NDNN
Eif2ak2	127.906	-0.384462	0.144122	N	-0.697941	0.000796699	D	-0.533036	0.015844	N	-0.388594	0.0844583	N	NDNN
Efnb2	128.63	-0.0468264	0.92957	N	-0.688951	0.00864902	D	0.00959133	0.984752	N	0.0328448	0.941285	N	NDNN
Wrn	131.854	-0.411065	0.215426	N	-0.675847	0.00976917	D	-0.429972	0.142932	N	-0.384553	0.180034	N	NDNN
Casp9	136.797	-0.229496	0.264411	N	-0.649773	1.66e-05	D	-0.455312	0.00504821	N	-0.512786	0.000758978	N	NDNN
Large1	137.3	-0.249836	0.223851	N	-0.615311	7e-05	D	-0.524199	0.00126318	N	0.260548	0.118921	N	NDNN
Fam84b	139.708	-0.282384	0.587948	N	-0.724014	0.0443772	D	-0.619768	0.0999741	N	-0.618931	0.0865053	N	NDNN
Hat1	141.425	-0.522408	0.021545	N	-0.654682	0.00103052	D	-0.493929	0.0202274	N	-0.2453	0.300578	N	NDNN
Exoc6b	142.46	-0.17396	0.394508	N	-0.63204	8.4e-06	D	-0.532219	0.00036795	N	-0.141535	0.437804	N	NDNN
Prune2	142.769	-1.44783	0.0871847	N	-2.37612	0.00050895	D	-1.28881	0.0950272	N	0.0150599	0.991028	N	NDNN
Gucy1a1	150.987	-0.432886	0.0778338	N	-0.764442	0.000116293	D	-0.38035	0.0977672	N	-0.445982	0.0350619	N	NDNN
Cask	155.384	-0.387978	0.024568	N	-0.671299	4e-06	D	-0.326338	0.0516189	N	-0.411102	0.00686312	N	NDNN
Lrif1	158.776	-0.104729	0.744346	N	-0.632518	0.000794257	D	-0.518904	0.00855363	N	-0.549501	0.00351273	N	NDNN
Fam57b	160.95	-0.166665	0.742632	N	-0.682365	0.0311847	D	-0.56986	0.0877696	N	0.51021	0.111195	N	NDNN
Nav2	164.995	-0.680408	0.162531	N	-1.49893	4.84e-05	D	-0.259506	0.640969	N	-0.17207	0.756658	N	NDNN
Cstf3	168.243	-0.431506	0.103258	N	-0.744127	0.000466987	D	-0.519781	0.0228379	N	-0.506991	0.0218994	N	NDNN
Snx18	187.273	-0.547999	0.00234331	N	-0.643868	9.3e-05	D	-0.22521	0.280279	N	-0.447082	0.00857072	N	NDNN
Gm2830	188.079	-0.279672	0.276576	N	-0.697851	0.000206093	D	-0.245881	0.302427	N	-0.569691	0.0025856	N	NDNN
Tspan15	189.819	-0.591311	0.0328004	N	-0.601024	0.0157031	D	-0.293169	0.327164	N	-0.298913	0.290647	N	NDNN
Gm12538	203.616	-0.018649	0.975293	N	-0.704333	0.00823457	D	-0.514468	0.073977	N	-0.496885	0.0740863	N	NDNN
Acsl3	204.562	-0.48314	0.181662	N	-0.773368	0.00686047	D	0.0744467	0.878044	N	-0.392378	0.222708	N	NDNN
Abi2	209.95	-0.482096	0.0189296	N	-0.667669	0.000169541	D	-0.323937	0.119088	N	-0.264917	0.201336	N	NDNN
Tmcc1	214.806	-0.314826	0.192502	N	-0.623286	0.000732712	D	-0.515777	0.00718558	N	-0.29454	0.158274	N	NDNN
Sdhaf3	222.512	-0.419163	0.182689	N	-0.607752	0.0166475	D	-0.0659892	0.876202	N	-0.359008	0.195435	N	NDNN
Ufl1	228.236	-0.456652	0.0921599	N	-0.600708	0.00828363	D	-0.358782	0.164315	N	-0.455917	0.0516252	N	NDNN
Mdfic	237.526	-0.545602	0.00228044	N	-0.849512	7.09e-08	D	-0.387554	0.0316538	N	-0.132337	0.54935	N	NDNN
Prkci	244.348	-0.597462	0.00731239	N	-0.639166	0.00162446	D	-0.579505	0.00506393	N	-0.40112	0.0631631	N	NDNN
Amotl1	280.926	-0.502276	0.000660955	N	-0.648545	1.48e-06	D	-0.585525	2.25e-05	N	0.368731	0.00740312	N	NDNN
Pcf11	333.663	-0.42833	0.0898145	N	-0.735767	0.000272101	D	-0.423316	0.0610644	N	-0.570677	0.00535014	N	NDNN
Srsf7	348.777	-0.476062	0.00846575	N	-0.636459	5.9e-05	D	-0.422132	0.0132985	N	-0.399497	0.0166877	N	NDNN
Tra2a	371.972	-0.0113576	0.978407	N	-0.635192	0.000448538	D	-0.421749	0.0315569	N	-0.471083	0.0110545	N	NDNN
Pip4p2	379.659	-0.386158	0.040756	N	-0.619177	7.69e-05	D	-0.151111	0.490385	N	0.0207869	0.941851	N	NDNN
Klhl5	418.716	-0.511154	0.00695655	N	-0.721312	1.26e-05	D	-0.53524	0.00193074	N	-0.39622	0.0261329	N	NDNN
Camk2d	425.993	-0.518592	3.24e-06	N	-0.646785	6.82e-10	D	-0.452633	4.14e-05	N	-0.440737	4.22e-05	N	NDNN
Spire1	488.153	-0.505616	0.01636	N	-0.834472	2.31e-06	D	-0.422093	0.0343202	N	-0.133997	0.593778	N	NDNN
Arhgap26	501.664	-0.559572	0.000269099	N	-0.755598	6.06e-08	D	-0.508093	0.000580442	N	-0.435043	0.00324887	N	NDNN
Vps13a	572.031	-0.517089	0.0044358	N	-0.636531	9.07e-05	D	0.101299	0.687458	N	-0.00148423	0.996405	N	NDNN
Rasl12	600.074	-0.658468	0.271867	N	-1.18447	0.00940935	D	-0.397368	0.512932	N	-0.796793	0.0983991	N	NDNN
Rcbtb2	623.564	-0.279496	0.385422	N	-0.605135	0.00961673	D	-0.406033	0.114703	N	0.0589973	0.872743	N	NDNN
Hist1h2bc	690.143	-0.301774	0.250874	N	-0.616327	0.00169212	D	-0.496963	0.0147187	N	-0.423448	0.0394104	N	NDNN
Gclm	710.022	-0.490973	0.122115	N	-0.7051	0.00654727	D	-0.535393	0.0515096	N	0.416797	0.137706	N	NDNN
Anp32a	769.145	-0.395492	0.0416782	N	-0.630226	8.44e-05	D	-0.407086	0.0187017	N	-0.167177	0.418077	N	NDNN
Clic5	1149.56	-0.218451	0.276764	N	-0.752233	4.47e-08	D	-0.479705	0.00105064	N	-0.187974	0.286071	N	NDNN
Ahnak	1290.85	-0.381422	0.0710159	N	-0.719542	1.62e-05	D	-0.376694	0.0456191	N	-0.172231	0.432234	N	NDNN
Nsdhl	1336.55	-0.414813	0.204769	N	-0.702842	0.00556417	D	-0.170567	0.640969	N	0.18766	0.572464	N	NDNN
Acss2	2098.75	-0.269877	0.602356	N	-0.906077	0.00662351	D	-0.254285	0.584834	N	0.582247	0.101392	N	NDNN
Gm5182	3682.27	-0.106708	0.8624	N	-1.01531	0.00120655	D	-0.625767	0.0711156	N	-0.149305	0.745725	N	NDNN
Calm1	4842.74	-0.332194	0.0565381	N	-0.619992	7.31e-06	D	-0.47336	0.000920235	N	-0.500638	0.000317448	N	NDNN
Rab6b	229.337	0.321459	0.365644	N	-0.651129	0.0155757	D	0.0297951	0.951712	N	1.37406	7.51e-10	U	NDNU	YES	1	25941
E2f2	90.3063	0.300973	0.669181	N	-1.04516	0.0246848	D	-0.224242	0.74321	N	1.05842	0.0137254	U	NDNU	YES	1	3817
Fbxw4	74.5505	-0.574335	0.120387	N	-0.675189	0.0334339	D	-0.295077	0.457042	N	0.710094	0.0132035	U	NDNU
Gm19522	147.401	-0.687026	0.0805675	N	-0.828596	0.0136824	D	0.167882	0.736128	N	1.01915	0.00073176	U	NDNU
Pck1	10629.7	-0.392226	0.713742	N	-0.89597	0.23312	N	-1.79534	0.00484988	D	-2.48523	2.76e-05	D	NNDD	YES	3	-28487	-19973	89
Acsl1	21959.9	-0.0299885	0.94515	N	-0.326239	0.149197	N	-0.695503	0.000264433	D	-1.80448	3.31e-26	D	NNDD	YES	2	-591	9003
Apol6	151.764	-0.40459	0.322019	N	-0.506669	0.130396	N	-0.975796	0.000944816	D	-1.5819	8.8e-09	D	NNDD	YES	2	-9004	-8110
Cat	11408.2	-0.178736	0.479518	N	-0.301251	0.112599	N	-0.957634	2.91e-10	D	-1.00103	3.02e-11	D	NNDD	YES	1	18690
Tmem120a	382.835	-0.0826608	0.890607	N	-0.469403	0.165351	N	-1.08469	0.000136813	D	-2.30436	2.44e-18	D	NNDD	YES	1	21952
Cebpa	2064.33	0.162586	0.562636	N	-0.356034	0.0748037	N	-0.825964	9.31e-07	D	-0.946402	8.09e-09	D	NNDD	YES	1	22322
Aqp7	1025.01	-0.0462285	0.899811	N	-0.108682	0.657858	N	-0.734344	1.05e-05	D	-0.849609	1.43e-07	D	NNDD	YES	1	240
Cav1	19371.8	-0.372049	0.0303248	N	-0.353559	0.0239408	N	-0.793571	3.16e-09	D	-1.18955	2.62e-20	D	NNDD	YES	1	8221
Creld2	68.6665	0.182512	0.569451	N	-0.300933	0.236174	N	-0.808833	0.000356472	D	-0.82306	0.000126852	D	NNDD	YES	1	8525
Nans	20.8832	-0.0354393	0.959507	N	-0.20038	0.65278	N	-1.02087	0.00781137	D	-0.807936	0.0251485	D	NNDD	YES	1	9437
Cldn1	523.76	0.193048	0.870359	N	-0.538878	0.494059	N	-1.83818	0.00221231	D	-2.00897	0.000544669	D	NNDD	YES	1	-11128
Pygb	216.095	-0.306118	0.356994	N	-0.514579	0.0439013	N	-0.901895	9.42e-05	D	-0.78396	0.000647718	D	NNDD	YES	1	-21541
Slc44a3	108.735	-0.215161	0.464265	N	-0.21915	0.37847	N	-0.638664	0.00213	D	-0.995196	2.42e-07	D	NNDD	YES	1	-27597
Pmepa1	1471.03	0.495546	0.0866315	N	-0.0550449	0.882018	N	-1.24471	7.27e-09	D	-2.32181	1.27e-29	D	NNDD	YES	1	-4673
Plin1	9954.75	-0.19009	0.330859	N	-0.32851	0.0272584	N	-0.925736	1.01e-13	D	-1.10333	1.94e-19	D	NNDD	YES	1	-92
Dkk3	10.5357	-0.42885	0.614572	N	-0.940687	0.136772	N	-1.39909	0.0302968	D	-1.35758	0.0248187	D	NNDD
Gm43966	13.1601	-0.738929	0.213798	N	-0.625894	0.239731	N	-1.34758	0.00933109	D	-1.66696	0.000706458	D	NNDD
Saxo2	14.9759	-0.34363	0.669181	N	-0.815925	0.158933	N	-1.31497	0.0218991	D	-1.09382	0.046416	D	NNDD
4933412A08Rik	15.9181	-0.351346	0.558929	N	-0.748815	0.0954802	N	-1.90274	4.76e-05	D	-2.38676	3.51e-07	D	NNDD
Gm11335	17.1874	0.366909	0.68546	N	-0.743353	0.278051	N	-1.41865	0.0287015	D	-1.83933	0.0025838	D	NNDD
Vnn3	17.5517	-0.786102	0.130599	N	-0.43927	0.387606	N	-1.71282	0.000202009	D	-2.71998	2.92e-08	D	NNDD
Gm31812	17.849	-0.222794	0.770626	N	-0.85906	0.0858647	N	-1.32178	0.0081491	D	-1.3664	0.00377649	D	NNDD
Ift122	19.0981	0.213387	0.719355	N	-0.150842	0.77714	N	-1.49791	0.000790645	D	-0.829727	0.0465707	D	NNDD
2006-09-01	20.6581	-0.542441	0.265136	N	-0.690321	0.0911197	N	-0.955775	0.0207534	D	-0.910527	0.0194601	D	NNDD
Nxnl1	21.2583	-0.326445	0.528007	N	-0.502282	0.216693	N	-0.911886	0.0207614	D	-1.77556	3.1e-06	D	NNDD
AC134468.1	22.5631	-0.699705	0.131219	N	-0.789122	0.0501639	N	-1.23347	0.00213623	D	-1.22492	0.00128038	D	NNDD
Dpy19l3	23.3969	-0.59011	0.155876	N	-0.535991	0.148189	N	-1.32109	0.000283446	D	-0.745059	0.0327812	D	NNDD
Fgf10	23.4684	-0.825063	0.0533754	N	-0.372793	0.393533	N	-1.0891	0.00538568	D	-0.816307	0.0308049	D	NNDD
Iqck	24.0253	-0.334519	0.496084	N	-0.268825	0.532454	N	-1.0332	0.00569382	D	-1.23974	0.000413306	D	NNDD
5730414N17Rik	25.8561	-0.456764	0.364645	N	-0.0216021	0.970009	N	-1.08759	0.00660448	D	-1.36313	0.000303906	D	NNDD
Cfap300	26.345	-0.228547	0.669268	N	-0.467332	0.236139	N	-0.839333	0.0268629	D	-0.963772	0.00614764	D	NNDD
1700056E22Rik	27.7369	-0.333117	0.421351	N	-0.512342	0.119369	N	-0.75354	0.0224968	D	-1.04281	0.000596212	D	NNDD
Dpp4	27.7557	-0.620532	0.333571	N	-0.692806	0.201112	N	-1.37727	0.00565296	D	-1.07681	0.0283464	D	NNDD
Gpld1	27.8549	-0.417363	0.332804	N	-0.505506	0.160342	N	-0.942379	0.00675851	D	-0.816694	0.0137941	D	NNDD
Sctr	28.7873	0.240411	0.660845	N	-0.482311	0.243689	N	-1.49274	9.31e-05	D	-2.15432	1.9e-08	D	NNDD
Heph	30.3351	-0.634693	0.108695	N	-0.508382	0.162076	N	-1.29836	0.000141916	D	-1.2978	6.15e-05	D	NNDD
Cnr1	31.3673	-1.10551	0.450668	N	-0.950685	0.457647	N	-2.68111	0.0108605	D	-2.40779	0.0204406	D	NNDD
P2rx6	32.5669	-0.421731	0.452362	N	-0.532992	0.243695	N	-0.889308	0.0390141	D	-1.18384	0.00278252	D	NNDD
Ift57	32.8876	-0.182137	0.7412	N	-0.343609	0.400867	N	-0.850133	0.0197167	D	-1.29265	0.000122174	D	NNDD
Nlrc5	33.3058	-0.41295	0.331533	N	-0.581151	0.0926776	N	-0.912463	0.00693159	D	-0.805905	0.0129082	D	NNDD
Ispd	35.0036	-0.393838	0.361153	N	-0.193458	0.643394	N	-1.15315	0.000551604	D	-0.907838	0.00458832	D	NNDD
Adgrg2	35.1517	-0.562268	0.265411	N	-0.451693	0.322705	N	-1.23915	0.00186877	D	-1.22448	0.00134569	D	NNDD
Flrt2	35.5718	-0.568439	0.206433	N	-0.611712	0.11303	N	-0.842333	0.0258172	D	-1.16314	0.000827896	D	NNDD
Tmem100	35.5873	-0.647706	0.288819	N	-0.904775	0.0681877	N	-1.18578	0.0139837	D	-0.98639	0.0388031	D	NNDD
Agbl5	38.7892	-0.437093	0.276594	N	-0.464313	0.17801	N	-0.995807	0.00181694	D	-1.02413	0.000736512	D	NNDD
Klhl13	39.2458	-0.134866	0.784043	N	-0.425806	0.1928	N	-1.15719	0.000129998	D	-0.701198	0.0180424	D	NNDD
Gm34921	39.6539	-0.405872	0.838078	N	-2.03478	0.0813145	N	-3.55077	0.000939498	D	-4.35219	3.29e-05	D	NNDD
Srpx	42.8137	-0.241528	0.554946	N	-0.542545	0.0692839	N	-1.0865	0.000154793	D	-0.913196	0.000893627	D	NNDD
Nagk	44.2748	-0.234272	0.49048	N	-0.398339	0.127217	N	-0.799092	0.00135602	D	-1.30762	3.88e-08	D	NNDD
Gla	47.1002	-0.233095	0.523697	N	-0.26176	0.389362	N	-0.732634	0.00609904	D	-0.770699	0.00216598	D	NNDD
Vstm4	47.6687	-0.0157241	0.978017	N	-0.544078	0.0514546	N	-0.86276	0.0016251	D	-0.673008	0.0113862	D	NNDD
Ociad2	48.0375	-0.332003	0.402464	N	-0.508874	0.104828	N	-0.704959	0.0217467	D	-0.900404	0.00149144	D	NNDD
Serpina3c	50.0355	-0.657168	0.0775887	N	-0.348707	0.34946	N	-0.748797	0.0242211	D	-1.12715	0.000199238	D	NNDD
Ift88	50.1116	0.0274947	0.952842	N	-0.442071	0.0676036	N	-0.613732	0.0116656	D	-0.603634	0.00825643	D	NNDD
Tbc1d16	50.1253	-0.114928	0.77517	N	0.0823078	0.805245	N	-0.703825	0.00579392	D	-1.02267	1.62e-05	D	NNDD
1700052K11Rik	50.4275	-0.195802	0.691195	N	-0.628222	0.0560392	N	-1.31455	2.08e-05	D	-1.20053	5.41e-05	D	NNDD
Cks1b	51.8354	-0.178917	0.683264	N	-0.453933	0.13788	N	-1.00608	0.000346749	D	-1.37999	2.65e-07	D	NNDD
Fam229b	53.5159	-0.267778	0.554188	N	-0.607273	0.0633972	N	-0.837517	0.00821289	D	-1.46585	6.03e-07	D	NNDD
0610040B10Rik	54.7396	-0.269004	0.40999	N	-0.446935	0.0786599	N	-0.774215	0.00155631	D	-0.738005	0.00153659	D	NNDD
Gm8258	56.2031	-0.057562	0.926164	N	-0.353594	0.337217	N	-0.828258	0.0104473	D	-0.974879	0.00132439	D	NNDD
Mpv17l	59.7452	-0.45615	0.243974	N	-0.191422	0.630673	N	-0.685774	0.0341411	D	-1.00471	0.000619785	D	NNDD
Rmdn2	62.0985	-0.526072	0.0880287	N	-0.438026	0.12156	N	-0.631676	0.0210025	D	-0.664419	0.0101101	D	NNDD
Vsir	62.195	0.268038	0.449848	N	-0.520229	0.058697	N	-1.0503	5.63e-05	D	-0.697335	0.00672157	D	NNDD
Gm37691	64.4539	-0.195894	0.74278	N	-0.452691	0.282617	N	-1.18419	0.000992225	D	-0.854951	0.0187118	D	NNDD
4632427E13Rik	64.6336	-0.0188333	0.975671	N	-0.232487	0.504236	N	-0.702543	0.0161242	D	-0.748314	0.00664138	D	NNDD
Nme7	66.2382	-0.38227	0.149425	N	-0.57869	0.00754907	N	-1.29123	2.11e-09	D	-1.06236	2.03e-07	D	NNDD
Fam13b	66.6492	-0.142561	0.704613	N	-0.376195	0.148863	N	-0.63477	0.0100801	D	-0.60321	0.0105743	D	NNDD
B3galt6	69.6778	-0.318714	0.246372	N	-0.290316	0.234131	N	-0.603844	0.00671327	D	-0.712345	0.000603545	D	NNDD
Gm8514	69.7225	0.0125937	0.980715	N	-0.21988	0.485141	N	-0.672663	0.0109018	D	-0.614335	0.0160548	D	NNDD
Chrdl1	71.5305	-0.790373	0.0545925	N	-0.440651	0.286012	N	-1.27014	0.000226191	D	-1.59077	1.38e-06	D	NNDD
Bbs2	72.1999	0.124993	0.745147	N	-0.40204	0.12169	N	-0.678342	0.00565278	D	-1.10615	1.03e-06	D	NNDD
Tor4a	72.9253	-0.0988934	0.821446	N	-0.435255	0.104432	N	-0.824574	0.000927931	D	-0.623897	0.0113883	D	NNDD
Fbln2	73.34	-0.00882515	0.985356	N	-0.252779	0.389337	N	-0.600998	0.0195079	D	-0.669536	0.00537801	D	NNDD
Ccpg1os	77.8162	-0.0408029	0.934912	N	-0.552656	0.0310154	N	-0.773311	0.00192661	D	-0.643259	0.00855209	D	NNDD
Gm36936	79.6273	-0.494701	0.0891962	N	-0.243142	0.41275	N	-0.835709	0.000592535	D	-1.04353	5.82e-06	D	NNDD
Nepn	81.2747	-0.203141	0.558251	N	-0.229522	0.42368	N	-0.834993	0.000370508	D	-0.798149	0.000404338	D	NNDD
Fam120c	85.4744	0.0018035	0.99619	N	-0.428871	0.0327745	N	-0.823547	1.94e-05	D	-0.648155	0.000514366	D	NNDD
Glb1l2	87.7382	-0.539048	0.139053	N	-0.437616	0.18983	N	-0.834597	0.00509355	D	-1.47718	7.23e-08	D	NNDD
Glod4	88.8067	-0.222891	0.421553	N	-0.475042	0.0201346	N	-0.806928	4.09e-05	D	-1.22142	8.61e-11	D	NNDD
Cdsn	89.3003	-0.364129	0.747143	N	0.0761653	0.942942	N	-1.8948	0.00475171	D	-3.23508	2.52e-07	D	NNDD
Fam126a	89.3918	-0.502788	0.0313764	N	-0.584753	0.00456952	N	-0.826411	4.86e-05	D	-0.695235	0.000448157	D	NNDD
Gm6277	90.3901	0.0542106	0.91473	N	-0.448192	0.100717	N	-0.768115	0.0024144	D	-0.925712	0.000105764	D	NNDD
Pag1	90.4332	-0.388717	0.489872	N	-0.707984	0.0915505	N	-0.824648	0.044758	D	-1.7061	2.03e-06	D	NNDD
Tk2	96.9793	-0.300227	0.194576	N	-0.596175	0.000906655	N	-0.904487	4.67e-07	D	-0.741786	1.92e-05	D	NNDD
1810037I17Rik	99.1855	-0.179263	0.597747	N	-0.583275	0.00982308	N	-0.877392	5.81e-05	D	-1.24394	2.25e-09	D	NNDD
Gpc3	99.9596	-0.381173	0.313191	N	-0.488792	0.114369	N	-0.968531	0.000486067	D	-0.730843	0.00895237	D	NNDD
Nphp1	101.544	-0.413788	0.139081	N	-0.0464378	0.891268	N	-0.89658	5.23e-05	D	-1.38171	7.22e-11	D	NNDD
Fndc1	102.387	-0.0685372	0.896402	N	-0.0150992	0.971424	N	-0.92372	0.000427257	D	-0.800772	0.00187187	D	NNDD
Glt8d1	114.537	-0.138368	0.572414	N	-0.45066	0.00648282	N	-0.820511	3.6e-07	D	-0.81281	1.43e-07	D	NNDD
Gm30918	119.901	-0.479143	0.0298682	N	-0.494607	0.0125139	N	-1.11679	1.62e-09	D	-1.45798	7.86e-16	D	NNDD
Tpk1	126.273	-0.492433	0.0258784	N	-0.499418	0.0123044	N	-0.7819	3.97e-05	D	-1.26036	3.48e-12	D	NNDD
Kctd15	132.223	-0.00539723	0.991313	N	-0.450428	0.0801236	N	-0.686015	0.0043574	D	-0.716399	0.00192187	D	NNDD
Tiam1	132.454	-0.286857	0.610876	N	-0.492657	0.243228	N	-1.05077	0.00368808	D	-0.844421	0.0212825	D	NNDD
Wdr73	139.971	0.113678	0.814037	N	-0.316801	0.323894	N	-0.655303	0.0192178	D	-1.05673	2.88e-05	D	NNDD
Fbn1	146.976	0.27255	0.446838	N	-0.408994	0.148744	N	-1.37819	7.66e-09	D	-0.706286	0.0044259	D	NNDD
Trit1	149.104	-0.426356	0.0863648	N	-0.548608	0.00886668	N	-0.637034	0.00210028	D	-0.687443	0.000518314	D	NNDD
Atp2b4	160.255	-0.139272	0.702613	N	-0.292826	0.26372	N	-0.936439	1.23e-05	D	-0.887661	2.32e-05	D	NNDD
Hyal2	169.907	-0.328927	0.211801	N	-0.487591	0.0211759	N	-0.845025	1.59e-05	D	-0.868935	4.89e-06	D	NNDD
Sgcd	170.795	-0.166554	0.468195	N	-0.51605	0.000985402	N	-0.739673	1.36e-06	D	-0.909125	5.98e-10	D	NNDD
Fam117a	170.908	-0.780651	0.240795	N	-0.73785	0.205898	N	-2.10751	8.98e-06	D	-1.75093	0.000247338	D	NNDD
Eef2kmt	194.168	-0.141818	0.630289	N	-0.389686	0.0505459	N	-0.800855	7.66e-06	D	-0.630599	0.000414324	D	NNDD
Vps26c	194.307	-0.140083	0.725735	N	-0.499307	0.0524281	N	-0.816254	0.000532916	D	-0.693675	0.00316754	D	NNDD
Ccnd2	195.322	-0.580759	0.0246258	N	-0.294912	0.273392	N	-0.76151	0.000676099	D	-0.743641	0.000668946	D	NNDD
Ccdc80	198.903	-0.468484	0.0963961	N	-0.381363	0.143523	N	-0.667203	0.00432693	D	-0.707561	0.00166236	D	NNDD
Hnmt	199.442	-0.31817	0.414934	N	-0.462552	0.131477	N	-0.649125	0.0234803	D	-1.34433	8.86e-08	D	NNDD
1810030O07Rik	211.868	-0.272958	0.151604	N	-0.473667	0.00162545	N	-0.657305	6.92e-06	D	-0.650653	4.47e-06	D	NNDD
Sccpdh	222.546	-0.472242	0.0278773	N	-0.586707	0.0016646	N	-1.03621	3.28e-09	D	-0.988128	9.31e-09	D	NNDD
Sh3glb2	223.639	-0.190316	0.515946	N	-0.30837	0.166419	N	-0.653967	0.000766447	D	-0.73896	6.89e-05	D	NNDD
Prps1	232.299	-0.322868	0.255065	N	-0.282286	0.264668	N	-0.758615	0.000281165	D	-0.965289	1.11e-06	D	NNDD
Slc35f5	234.595	-0.297742	0.14834	N	-0.455233	0.00609894	N	-0.636475	6.24e-05	D	-0.88271	4.3e-09	D	NNDD
Gtf2b	251.314	-0.293952	0.300306	N	-0.367945	0.11504	N	-0.665651	0.00138128	D	-0.948554	1.03e-06	D	NNDD
Mfsd4b1	287.327	-0.332163	0.33509	N	-0.566397	0.0324078	N	-0.961674	5.84e-05	D	-2.21717	5.63e-23	D	NNDD
Nipsnap3b	291.214	-0.35629	0.18053	N	-0.545652	0.0098365	N	-0.61221	0.00307072	D	-1.38912	8.21e-14	D	NNDD
Wdr6	291.274	-0.448021	0.193013	N	-0.330624	0.299371	N	-0.78685	0.00294996	D	-1.54368	1.25e-10	D	NNDD
Tmbim1	295.793	0.0347207	0.907733	N	-0.167662	0.346801	N	-0.784778	1.25e-08	D	-0.76427	1.42e-08	D	NNDD
Wls	301.489	-0.382008	0.0718655	N	-0.452288	0.0131786	N	-0.61906	0.000353323	D	-0.701203	2.45e-05	D	NNDD
Extl3	305.522	-0.328462	0.117607	N	-0.565685	0.000703326	N	-0.914382	6.42e-09	D	-0.846098	5.25e-08	D	NNDD
Cbx4	315.532	-0.294002	0.3205	N	-0.386454	0.107272	N	-0.662072	0.00207123	D	-0.602242	0.00468147	D	NNDD
Ano10	315.798	-0.317701	0.0657924	N	-0.423425	0.00356607	N	-0.9713	3.73e-13	D	-0.709024	9.81e-08	D	NNDD
Alg9	340.113	-0.207654	0.347122	N	-0.551479	0.000427295	N	-0.685306	6.48e-06	D	-0.621646	3.48e-05	D	NNDD
Fgfr1	349.862	-0.385275	0.0443072	N	-0.580561	0.000287352	N	-0.735166	2.03e-06	D	-0.789462	1.6e-07	D	NNDD
Spcs2	353.89	-0.119429	0.603949	N	-0.484198	0.000857649	N	-0.676162	1.21e-06	D	-0.709837	1.62e-07	D	NNDD
Arl2bp	370.523	-0.349798	0.135291	N	-0.479609	0.0127532	N	-0.627589	0.0006188	D	-0.68465	0.000105281	D	NNDD
Fam49b	372.519	-0.368222	0.054698	N	-0.569448	0.000319778	N	-0.640371	3.7e-05	D	-0.968709	3.79e-11	D	NNDD
Nr4a3	384.584	-0.567622	0.775609	N	-1.30687	0.343976	N	-3.46721	0.00178865	D	-3.64827	0.00074233	D	NNDD
Fkbp9	408.884	-0.456876	0.0170772	N	-0.254464	0.196799	N	-0.606766	0.000249965	D	-1.16771	2.1e-14	D	NNDD
Ces1f	410.03	-0.374644	0.247965	N	-0.0570362	0.880525	N	-0.919345	8.35e-05	D	-1.66678	2.05e-14	D	NNDD
Asah1	442.247	-0.3787	0.11883	N	-0.552424	0.00525199	N	-0.761301	4.42e-05	D	-0.986105	2.93e-08	D	NNDD
Tmem140	444.074	0.129005	0.759362	N	-0.461154	0.0852399	N	-0.796466	0.000852639	D	-0.713287	0.00273844	D	NNDD
Wipi2	514.049	0.0622212	0.89114	N	-0.0672554	0.843323	N	-0.67392	0.00260793	D	-0.84435	6.54e-05	D	NNDD
Mrps6	529.598	-0.245738	0.148093	N	-0.462562	0.000439776	N	-0.672052	7.46e-08	D	-0.73057	1.99e-09	D	NNDD
Arsb	566.01	-0.200263	0.380686	N	-0.276738	0.12892	N	-0.606761	9.9e-05	D	-0.641122	2.37e-05	D	NNDD
Sulf2	568.975	-0.116686	0.753619	N	-0.43318	0.0643887	N	-1.22102	4.33e-10	D	-1.3109	1.03e-11	D	NNDD
Laptm4b	611.013	-0.277558	0.122693	N	-0.34848	0.0210866	N	-0.702216	1.67e-07	D	-0.619333	3.72e-06	D	NNDD
Ap3s1	704.894	-0.382597	0.0689475	N	-0.520481	0.00299459	N	-0.708438	1.82e-05	D	-0.834032	1.73e-07	D	NNDD
Pde4dip	719.765	-0.586163	0.00359071	N	-0.160129	0.512415	N	-0.787549	7.91e-06	D	-0.785599	6.22e-06	D	NNDD
Maged1	754.415	-0.154301	0.553805	N	-0.589038	0.000406493	N	-0.920952	2.91e-09	D	-0.792604	3.57e-07	D	NNDD
Slc27a1	854.954	-0.356133	0.297293	N	-0.511677	0.0606947	N	-0.748134	0.00266093	D	-1.66982	5.56e-14	D	NNDD
Hipk2	870.191	-0.455804	0.0366063	N	-0.425833	0.0323177	N	-0.697792	0.000100276	D	-0.832244	1.38e-06	D	NNDD
Gm2a	880.092	-0.178678	0.466408	N	-0.2554	0.183627	N	-0.625957	8.42e-05	D	-0.957969	1.41e-10	D	NNDD
Capn2	911.898	-0.209058	0.336394	N	-0.597503	8.05e-05	N	-1.05477	6.39e-14	D	-0.824099	6.51e-09	D	NNDD
Enpp2	934.83	-0.316115	0.236188	N	-0.451333	0.0347995	N	-0.605596	0.00239295	D	-1.595	1.55e-19	D	NNDD
Cavin1	1054.92	-0.226213	0.403589	N	-0.509689	0.008516	N	-1.07914	2.84e-10	D	-0.77087	1.19e-05	D	NNDD
Pgrmc1	1134.82	-0.417017	0.0228827	N	-0.442935	0.00690412	N	-0.806129	4.53e-08	D	-1.03136	5.03e-13	D	NNDD
1600014C10Rik	1200.3	-0.359643	0.0171753	N	-0.365147	0.00757224	N	-0.661022	8.13e-08	D	-0.784279	6.08e-11	D	NNDD
Eif4ebp1	1254.71	0.089834	0.824054	N	-0.278354	0.285525	N	-0.737294	0.000454648	D	-0.726299	0.000452487	D	NNDD
Ppa1	1284.62	-0.0180801	0.963931	N	-0.202573	0.350321	N	-0.778459	2.09e-06	D	-1.98012	2.39e-38	D	NNDD
Dhrs9	1298.78	-0.53565	0.616413	N	-0.836311	0.302703	N	-1.45938	0.041487	D	-1.76217	0.00836695	D	NNDD
Gm35638	1618.17	-0.259299	0.239265	N	-0.477475	0.00435302	N	-0.631883	6.05e-05	D	-0.660624	1.88e-05	D	NNDD
Sav1	1754.05	0.0441861	0.941993	N	-0.262946	0.463537	N	-0.632965	0.0320414	D	-1.03521	7.98e-05	D	NNDD
Dlc1	1761.62	-1.01917	0.057056	N	-0.846615	0.0885485	N	-1.33695	0.00268385	D	-1.21798	0.00625437	D	NNDD
Abhd5	1966.58	-0.45685	0.15481	N	-0.588622	0.0265601	N	-0.724934	0.00387772	D	-1.20906	1.18e-07	D	NNDD
Ddhd2	1976.29	-0.296477	0.242294	N	-0.583198	0.00215324	N	-0.64616	0.000459264	D	-1.0502	7.29e-10	D	NNDD
Gyg	2667.13	-0.359178	0.281493	N	-0.532063	0.0444389	N	-1.16799	2.3e-07	D	-0.956546	3.15e-05	D	NNDD
Mbnl1	2694.07	-0.526755	4.8e-05	N	-0.549486	7.95e-06	N	-0.694773	3.56e-09	D	-0.805805	2.76e-12	D	NNDD
Hp	3140.31	0.0782978	0.818475	N	0.2402	0.275823	N	-0.707966	4.84e-05	D	-0.88866	1.02e-07	D	NNDD
Cd164	3783.8	-0.343084	0.0353212	N	-0.491896	0.000326181	N	-0.649271	4.92e-07	D	-0.885216	9.3e-13	D	NNDD
Gpx8	4068.29	-0.391605	0.0985079	N	-0.535314	0.00641158	N	-0.769231	2.19e-05	D	-2.4163	5.69e-49	D	NNDD
Parm1	4144.49	0.0240399	0.963076	N	-0.593405	0.0126579	N	-1.32863	1.17e-10	D	-1.22717	2.9e-09	D	NNDD
Cyb5a	4771.6	-0.498472	0.0150565	N	-0.553333	0.00247363	N	-0.84093	5.67e-07	D	-1.14891	1.1e-12	D	NNDD
Hsd11b1	6763.1	-0.26177	0.464594	N	-0.257226	0.397884	N	-0.713229	0.00301761	D	-2.01679	6.37e-22	D	NNDD
Cidec	7764.42	-0.180783	0.670511	N	0.0534795	0.894124	N	-0.610504	0.0238899	D	-2.33767	8.14e-26	D	NNDD
Adipoq	11982.3	-0.0885219	0.728978	N	-0.105027	0.608038	N	-0.694448	5.17e-07	D	-2.13411	3.36e-63	D	NNDD
Car3	62812.7	-0.742298	0.125051	N	-0.753062	0.0758723	N	-1.70833	1.69e-06	D	-4.03661	1.49e-34	D	NNDD
Lipe	7101.01	-0.021728	0.952144	N	-0.171178	0.397067	N	-0.792203	6.55e-08	D	-0.596121	7.85e-05	N	NNDN	YES	4	-5763	2761	4281	5847
Rasa3	80.3638	-0.220737	0.643086	N	-0.472761	0.163988	N	-0.719741	0.0242292	D	-0.464577	0.165738	N	NNDN	YES	3	4215	7289	12866
Coq8a	3032.01	-0.18143	0.611725	N	-0.594223	0.0100877	N	-0.64064	0.00441672	D	-0.0233343	0.954889	N	NNDN	YES	2	-14541	23988
Ptges	47.885	-0.560691	0.18963	N	-0.27405	0.519928	N	-1.52085	1.05e-05	D	0.282416	0.490785	N	NNDN	YES	2	-26562	18475
1810062G17Rik	15.1955	-0.99938	0.0538644	N	-0.872604	0.0647452	N	-1.70758	0.000545015	D	-0.330949	0.549158	N	NNDN	YES	1	10380
Bend3	74.7314	-0.149514	0.719925	N	-0.266162	0.397606	N	-0.867749	0.000905014	D	-0.473431	0.0847206	N	NNDN	YES	1	12225
Trp53i11	60.7395	0.20773	0.705565	N	-0.666391	0.074051	N	-1.4402	3.61e-05	D	0.48966	0.187283	N	NNDN	YES	1	13156
Entpd6	115.244	-0.62381	0.0738297	N	-0.414925	0.219057	N	-0.977396	0.000720444	D	-0.52938	0.0903001	N	NNDN	YES	1	16152
Angptl4	518.791	-0.235063	0.746405	N	-0.880948	0.0546684	N	-1.64895	4.01e-05	D	-0.598147	0.219066	N	NNDN	YES	1	1846
Litaf	300.042	0.0836503	0.862864	N	-0.374694	0.201863	N	-1.10236	4.43e-06	D	0.441455	0.104499	N	NNDN	YES	1	19052
Cars2	240.597	0.409619	0.394328	N	-0.254124	0.577965	N	-0.907436	0.00969799	D	-0.334914	0.432294	N	NNDN	YES	1	19930
Clstn3	1112.65	0.238848	0.46296	N	-0.109469	0.730653	N	-0.671765	0.00217192	D	-0.533641	0.0175488	N	NNDN	YES	1	21115
Cp	271.626	-0.335372	0.340475	N	-0.228762	0.484208	N	-0.66594	0.010984	D	-0.0490712	0.9082	N	NNDN	YES	1	21586
Rrbp1	170.597	-0.172725	0.448513	N	-0.353025	0.0352398	N	-0.634645	4.99e-05	D	-0.385143	0.0170345	N	NNDN	YES	1	23650
D430042O09Rik	56.9303	-0.0338246	0.952842	N	-0.185402	0.599189	N	-0.644883	0.0278351	D	-0.142322	0.700693	N	NNDN	YES	1	23987
Pdgfa	39.5772	-0.334785	0.553506	N	-0.575925	0.180716	N	-0.990079	0.0143008	D	-0.156277	0.775672	N	NNDN	YES	1	24187
Ppp1r16a	49.4513	0.0454365	0.936173	N	0.0716001	0.861053	N	-0.641157	0.039378	D	-0.290938	0.392288	N	NNDN	YES	1	24679
Camk2a	18.3786	-1.02556	0.347928	N	1.29313	0.115131	N	-1.87123	0.0437699	D	1.05943	0.209304	N	NNDN	YES	1	6928
Tmem43	206.138	-0.282191	0.452201	N	-0.261419	0.419632	N	-0.625101	0.021258	D	-0.27698	0.379247	N	NNDN	YES	1	7350
Tmtc4	64.9802	-0.734688	0.119903	N	-0.688867	0.102592	N	-1.18807	0.00211992	D	-0.736667	0.0693955	N	NNDN	YES	1	807
Bid	28.7396	-0.476834	0.278665	N	-0.635991	0.081381	N	-1.04531	0.00380552	D	-0.245529	0.570696	N	NNDN	YES	1	-14348
Fxyd6	31.7535	-1.03041	0.064445	N	0.323769	0.586	N	-1.07039	0.0353683	D	-0.258052	0.683665	N	NNDN	YES	1	-14687
Map9	48.665	-0.286744	0.508413	N	-0.160603	0.693386	N	-0.884891	0.00494717	D	0.0179425	0.972954	N	NNDN	YES	1	-160
Relb	17.5445	0.337486	0.592445	N	-0.110816	0.862235	N	-1.57395	0.00247409	D	0.0487336	0.947976	N	NNDN	YES	1	-17033
Dcaf4	92.8331	-0.28498	0.344509	N	-0.3647	0.140333	N	-0.674983	0.00306375	D	-0.0774769	0.8167	N	NNDN	YES	1	-20955
Dusp1	1458.42	0.172159	0.850965	N	-0.805327	0.136871	N	-1.17732	0.0172789	D	-0.811094	0.123151	N	NNDN	YES	1	-258
Strada	74.0438	0.168614	0.640019	N	-0.164532	0.591627	N	-0.76113	0.00170981	D	-0.4545	0.0681651	N	NNDN	YES	1	-277
Vipr2	19.2597	-0.986298	0.3232	N	-1.27026	0.122083	N	-1.75818	0.027516	D	-0.695842	0.44301	N	NNDN	YES	1	-29747
Ptpn23	101.512	-0.0235434	0.976302	N	-0.228229	0.625252	N	-0.753979	0.0448982	D	-0.142792	0.7805	N	NNDN	YES	1	-3473
Kcnma1	10.0152	-0.793276	0.349093	N	-0.182337	0.836602	N	-1.79635	0.0145135	D	-0.419856	0.604269	N	NNDN
Kbtbd12	10.675	-0.954216	0.185288	N	-1.10854	0.0735775	N	-1.99842	0.00211471	D	-0.925357	0.137902	N	NNDN
Ap5b1	10.6958	0.0254543	0.980715	N	0.0021419	0.997881	N	-1.2985	0.0482738	D	0.259091	0.704462	N	NNDN
Ribc1	10.9271	0.214821	0.805697	N	-0.55	0.383465	N	-1.81814	0.00432502	D	-0.862206	0.142601	N	NNDN
Ephb2	11.4757	-0.397661	0.589339	N	-0.968727	0.0767579	N	-1.32245	0.0210644	D	-0.60293	0.296797	N	NNDN
Sema4d	12.6105	-0.157891	0.862545	N	-0.653301	0.265839	N	-1.4301	0.0143102	D	-0.452165	0.466829	N	NNDN
Lpxn	12.8138	-0.060122	0.951372	N	-0.655914	0.230046	N	-1.30101	0.0179444	D	-0.63303	0.245197	N	NNDN
Elovl4	12.8648	0.0411754	0.977757	N	-1.11802	0.142308	N	-1.66325	0.0347004	D	0.867597	0.214183	N	NNDN
Spint2	14.1606	-0.223884	0.774867	N	-0.0919666	0.892537	N	-1.19819	0.0289651	D	-0.227617	0.723663	N	NNDN
Vdr	14.29	0.0738075	0.957005	N	-0.60587	0.452024	N	-1.76256	0.0184758	D	0.327045	0.703266	N	NNDN
Cand2	14.4252	-1.2389	0.105783	N	0.153901	0.862283	N	-2.4914	0.000694942	D	0.00418224	0.996965	N	NNDN
Gm26606	14.7056	0.0540761	0.952818	N	-0.711973	0.150882	N	-1.08914	0.031276	D	-0.91112	0.0559442	N	NNDN
Tmem181a	14.9657	-0.266897	0.683946	N	-0.430697	0.396522	N	-1.02919	0.0353196	D	-0.361517	0.489081	N	NNDN
Nptxr	14.9708	0.641278	0.315459	N	0.363559	0.565119	N	-1.24264	0.0482062	D	0.247874	0.717133	N	NNDN
Armc7	14.9887	-0.192431	0.787843	N	-0.306809	0.570875	N	-1.45999	0.00299057	D	-0.626107	0.193032	N	NNDN
Casq2	15.1465	-0.798063	0.21821	N	0.0775018	0.915301	N	-1.15507	0.0434828	D	-0.748423	0.184897	N	NNDN
Lilr4b	15.1685	-0.0801493	0.953898	N	-0.982193	0.192166	N	-1.65014	0.0240904	D	-0.603765	0.457222	N	NNDN
Hvcn1	15.3109	-0.982532	0.15674	N	-1.01926	0.0919289	N	-1.44434	0.0171779	D	-0.442588	0.523727	N	NNDN
Cklf	15.7904	-0.858529	0.102426	N	-0.87715	0.0604104	N	-1.19767	0.0124217	D	-0.535385	0.281595	N	NNDN
Carns1	16.1343	-0.023065	0.978407	N	-0.208948	0.71222	N	-0.956033	0.0492939	D	-0.78546	0.0865053	N	NNDN
Map3k15	16.1476	-0.159956	0.816895	N	-0.520092	0.260936	N	-1.13077	0.0131017	D	-0.65004	0.143309	N	NNDN
Pdpn	16.4577	-0.249637	0.756205	N	-0.646627	0.253017	N	-1.15664	0.0355843	D	-0.566931	0.323218	N	NNDN
Tmod4	16.5809	-0.968682	0.385422	N	1.14236	0.180904	N	-1.896	0.0443218	D	1.00722	0.242966	N	NNDN
Zdhhc12	16.8389	-0.165418	0.810537	N	-0.679885	0.129231	N	-0.937712	0.0440316	D	0.0621008	0.923309	N	NNDN
Sema4c	17.0857	-0.253048	0.745336	N	-0.728292	0.18084	N	-1.53087	0.00468473	D	0.202075	0.757539	N	NNDN
5430430B14Rik	17.3262	0.424733	0.547149	N	-0.348124	0.59154	N	-1.17349	0.0417878	D	-0.39135	0.541607	N	NNDN
Ggt5	17.667	-0.444293	0.434053	N	-0.474991	0.320371	N	-0.932696	0.0434053	D	-0.824471	0.0584465	N	NNDN
Gm17518	17.8764	-0.363999	0.540878	N	-0.569005	0.224238	N	-0.918199	0.0481626	D	-0.762645	0.0845427	N	NNDN
Upp2	18.3806	-0.377966	0.496676	N	-0.533485	0.230698	N	-0.919691	0.0362708	D	-0.759951	0.0685687	N	NNDN
Hhex	18.4253	-0.652822	0.207811	N	-0.354955	0.477914	N	-1.28224	0.00413922	D	-0.736338	0.0928524	N	NNDN
Alcam	18.6236	-0.479	0.334874	N	-0.6463	0.11541	N	-0.843887	0.0461974	D	-0.661183	0.10224	N	NNDN
Cpne2	18.632	-0.436759	0.442313	N	-0.409745	0.404155	N	-1.04889	0.021323	D	-0.451754	0.346762	N	NNDN
Basp1	18.6522	0.0735366	0.943073	N	-0.792943	0.161436	N	-1.26698	0.0231251	D	-0.533669	0.374542	N	NNDN
2310040G24Rik	18.6656	-0.680961	0.193062	N	-0.438591	0.370533	N	-1.21624	0.00738304	D	-0.406724	0.411102	N	NNDN
Ank1	19.0519	-2.07162	0.11182	N	0.365531	0.807233	N	-3.3241	0.00426618	D	0.11236	0.950913	N	NNDN
Trabd2b	19.7379	-0.501999	0.451307	N	-0.577364	0.295929	N	-1.62069	0.00150774	D	-0.755583	0.146516	N	NNDN
Smc2	19.7534	-0.119023	0.865193	N	-0.714003	0.0922984	N	-0.88626	0.0441219	D	-0.216456	0.674793	N	NNDN
Asb5	19.757	-1.70067	0.172818	N	-0.0393825	0.980143	N	-3.41804	0.00165827	D	0.36019	0.800165	N	NNDN
Gm5627	19.7579	-0.577336	0.242465	N	-0.223232	0.65546	N	-1.53495	0.000398847	D	-0.18966	0.713709	N	NNDN
Vgll3	19.7849	-0.388093	0.573228	N	-0.431492	0.45112	N	-1.16728	0.0240134	D	-0.131454	0.852586	N	NNDN
Gm16168	20.1008	-1.03404	0.0995037	N	-0.662314	0.270047	N	-1.19291	0.0344019	D	-0.86357	0.125107	N	NNDN
Cpa3	20.5131	-0.185612	0.826379	N	-0.493005	0.395696	N	-1.08151	0.044249	D	-0.0531544	0.948042	N	NNDN
Pibf1	20.528	-0.0958969	0.883103	N	-0.689836	0.071257	N	-0.895454	0.0239189	D	-0.48809	0.221223	N	NNDN
Tpsb2	21.1468	0.319265	0.666236	N	-0.19227	0.77516	N	-1.23708	0.0215625	D	-0.804906	0.132883	N	NNDN
Glipr2	21.7701	-0.198116	0.746107	N	-0.732938	0.0740471	N	-1.25491	0.0024129	D	-0.447104	0.309949	N	NNDN
Snx30	22.1253	-0.336788	0.619681	N	-0.697653	0.16323	N	-1.11649	0.0230533	D	0.0355894	0.964296	N	NNDN
Rabep2	22.7217	0.189932	0.749012	N	-0.758146	0.0617796	N	-1.0057	0.0153998	D	-0.582519	0.162247	N	NNDN
Amot	23.0122	-0.417273	0.50599	N	-0.33355	0.544359	N	-1.05208	0.0294219	D	0.153947	0.804935	N	NNDN
Foxs1	23.9868	-0.187981	0.754108	N	-0.449853	0.292686	N	-0.979293	0.0158765	D	-0.240104	0.616428	N	NNDN
Mks1	24.0482	-0.181062	0.764715	N	-0.602907	0.137754	N	-0.961634	0.0172824	D	-0.293541	0.523888	N	NNDN
Gm36028	24.3602	-0.65983	0.233021	N	-0.856078	0.0640281	N	-0.995154	0.0346647	D	0.0200265	0.978579	N	NNDN
Gxylt2	25.0572	-0.136899	0.822837	N	-0.408399	0.318494	N	-1.04229	0.00630082	D	-0.390245	0.34248	N	NNDN
Camk2n2	27.204	-0.043358	0.945675	N	-0.495592	0.151728	N	-0.860127	0.0119167	D	-0.528686	0.119059	N	NNDN
Acox2	27.2892	-0.811121	0.279474	N	-1.14932	0.061502	N	-1.45426	0.0170461	D	0.643284	0.315813	N	NNDN
Stn1	27.5271	-0.234935	0.67771	N	-0.52655	0.19774	N	-0.868222	0.028553	D	-0.606769	0.123314	N	NNDN
Madd	28.3294	0.449833	0.318886	N	-0.0252056	0.964165	N	-1.01443	0.0121176	D	0.277356	0.525776	N	NNDN
Rian	28.9823	0.000674115	0.999057	N	-0.375337	0.341407	N	-0.818484	0.0264807	D	-0.582424	0.107663	N	NNDN
Rtl8c	29.1762	-0.197918	0.677785	N	-0.183449	0.646001	N	-0.716796	0.036519	D	-0.589527	0.0716486	N	NNDN
A130010J15Rik	29.2461	-0.305511	0.514566	N	-0.588489	0.0968648	N	-0.873086	0.0136648	D	-0.281826	0.483803	N	NNDN
Zmym1	29.6617	-0.54587	0.138218	N	-0.523936	0.108793	N	-0.714426	0.0308299	D	-0.443176	0.183383	N	NNDN
Jade3	30.3386	-0.470203	0.328091	N	-0.543802	0.178372	N	-0.813001	0.0397762	D	-0.458549	0.266281	N	NNDN
Gm340	31.3759	-0.392412	0.380687	N	-0.218625	0.60748	N	-0.754151	0.039378	D	0.0427425	0.937795	N	NNDN
Lpar4	31.8329	-0.695411	0.217977	N	-0.857825	0.0698672	N	-1.17236	0.0109445	D	-0.825733	0.075964	N	NNDN
Gm3289	32.9016	-0.273481	0.501963	N	-0.352878	0.284514	N	-0.642611	0.0433706	D	-0.549876	0.0689558	N	NNDN
Hist1h1d	32.9123	0.0303578	0.977879	N	-0.754061	0.165621	N	-1.39941	0.00606178	D	0.131789	0.859029	N	NNDN
Gm5837	34.1749	-0.234959	0.619377	N	-0.341015	0.357033	N	-0.737164	0.0317142	D	-0.35055	0.339438	N	NNDN
Cyp2j9	34.5731	-0.104876	0.852817	N	-0.499841	0.149328	N	-0.832506	0.0132985	D	-0.574172	0.0849306	N	NNDN
Ebpl	34.6306	-0.486107	0.211752	N	-0.364247	0.308162	N	-0.870162	0.00758907	D	-0.624193	0.0517548	N	NNDN
Sdr42e1	35.1505	-0.0778398	0.896951	N	-0.1485	0.726749	N	-0.68694	0.0468944	D	-0.480787	0.161819	N	NNDN
Mgl2	35.2418	-0.0920705	0.883103	N	-0.340488	0.396474	N	-0.740221	0.0444568	D	-0.0605053	0.909643	N	NNDN
Bin3	35.5148	-0.117409	0.821313	N	-0.461742	0.161785	N	-0.929346	0.00325224	D	-0.348951	0.312386	N	NNDN
Nnt	35.6879	-0.661246	0.17304	N	-0.287821	0.559162	N	-0.847098	0.0441094	D	-0.188414	0.722338	N	NNDN
Abracl	36.2541	-0.620247	0.0931438	N	-0.61392	0.0629892	N	-0.973279	0.00271094	D	-0.126081	0.774612	N	NNDN
Gatm	36.8057	-0.3492	0.412367	N	-0.554735	0.0980673	N	-0.858206	0.00888602	D	-0.436855	0.206557	N	NNDN
Gstcd	36.8318	-0.286485	0.464786	N	-0.460176	0.134474	N	-0.648369	0.0365357	D	0.230419	0.485433	N	NNDN
Cep162	36.999	-0.00278838	0.99591	N	-0.423527	0.166114	N	-0.686594	0.0233017	D	-0.0829964	0.840901	N	NNDN
Crtc1	37.0168	-0.0740632	0.905844	N	-0.486459	0.173324	N	-0.869941	0.0108386	D	-0.300749	0.438545	N	NNDN
Creb3l1	37.4568	0.453485	0.404099	N	0.0772205	0.898081	N	-1.3683	0.00144702	D	-0.239576	0.658656	N	NNDN
Ar	37.4893	-0.779128	0.0863648	N	-0.0217007	0.970498	N	-0.839532	0.041967	D	-0.018847	0.977426	N	NNDN
Jpt2	38.0747	-0.310839	0.48633	N	-0.561823	0.0979142	N	-0.847438	0.0106499	D	-0.510902	0.13307	N	NNDN
Mcm9	39.1485	-0.295103	0.444567	N	-0.523453	0.0783902	N	-0.608311	0.0466682	D	-0.594339	0.0387387	N	NNDN
Selenoh	40.1764	0.0354148	0.954292	N	-0.144582	0.722074	N	-0.654592	0.0470454	D	-0.532699	0.0949074	N	NNDN
Bloc1s3	41.7617	-0.3449	0.288262	N	-0.591539	0.0222647	N	-0.679793	0.0110863	D	-0.335163	0.234595	N	NNDN
Vcan	42.6327	0.105454	0.875253	N	-0.475513	0.252725	N	-1.99201	1.12e-07	D	-0.697596	0.065824	N	NNDN
Adgrd1	42.9286	0.651311	0.169347	N	0.363849	0.443492	N	-0.912491	0.0367439	D	0.170713	0.757404	N	NNDN
Gm12989	43.3092	0.0491268	0.933885	N	0.0627929	0.884572	N	-0.821784	0.00971994	D	-0.242938	0.51599	N	NNDN
Dnase2a	43.8925	-0.388415	0.283797	N	-0.476811	0.115945	N	-0.601192	0.0494793	D	-0.378182	0.227392	N	NNDN
Col14a1	44.3293	0.196424	0.71921	N	-0.248563	0.577814	N	-0.878902	0.0174932	D	-0.190168	0.685004	N	NNDN
Abi3bp	44.9944	-0.145622	0.803499	N	-0.525037	0.159121	N	-0.890349	0.0112956	D	-0.560426	0.121927	N	NNDN
Tmem138	45.943	0.170323	0.677893	N	0.153099	0.659684	N	-0.716284	0.014527	D	-0.16578	0.64196	N	NNDN
Rbms3	46.7127	-0.425061	0.172723	N	-0.418009	0.126065	N	-0.738364	0.0050343	D	-0.381907	0.16514	N	NNDN
Tcp11l1	46.8376	-0.136832	0.779509	N	-0.287456	0.412904	N	-0.664576	0.0358156	D	0.0728107	0.86985	N	NNDN
Fer	48.0683	-0.35944	0.380687	N	-0.587725	0.0676036	N	-0.644131	0.0499834	D	-0.412817	0.222592	N	NNDN
Csf2rb	48.3739	0.519422	0.160985	N	0.03834	0.93618	N	-0.805772	0.0170109	D	-0.302098	0.428386	N	NNDN
Ccn2	48.4566	-0.176018	0.760214	N	-0.496036	0.205528	N	-0.858002	0.0186781	D	-0.56766	0.130145	N	NNDN
Gm37981	48.6757	-0.326752	0.420262	N	-0.416522	0.207657	N	-0.689981	0.0283262	D	-0.12192	0.769436	N	NNDN
Ing5	49.4016	-0.191634	0.63871	N	-0.352421	0.246242	N	-0.640156	0.0251446	D	-0.47645	0.0918696	N	NNDN
Gm4875	49.5743	-0.186308	0.748165	N	-0.424108	0.305262	N	-0.859554	0.0220005	D	0.267947	0.54173	N	NNDN
Gm18335	49.6208	-0.605205	0.0925546	N	-0.565891	0.0805963	N	-0.6608	0.0430097	D	-0.363759	0.295881	N	NNDN
Gas7	51.3288	0.234446	0.590814	N	-0.329114	0.353498	N	-0.74537	0.0197959	D	-0.0448197	0.928052	N	NNDN
Mall	51.4989	0.187812	0.641249	N	-0.245864	0.454579	N	-0.779677	0.00593603	D	-0.00493126	0.991897	N	NNDN
Bcl6b	51.7359	-0.386786	0.472868	N	-0.429734	0.336716	N	-1.11835	0.0041224	D	0.716139	0.054558	N	NNDN
Klhdc1	51.9519	-0.347299	0.488084	N	-0.577826	0.131959	N	-0.798332	0.0314387	D	-0.277323	0.528887	N	NNDN
Mad2l1	52.2974	-0.459123	0.296177	N	-0.62571	0.0811176	N	-0.775157	0.0285523	D	-0.523504	0.150681	N	NNDN
Gfpt2	52.9459	0.155179	0.875498	N	-0.494841	0.447489	N	-1.1366	0.0435034	D	0.0114241	0.99097	N	NNDN
Mettl27	53.3708	-0.0600548	0.917461	N	-0.38795	0.251869	N	-0.703525	0.0254888	D	-0.388042	0.245382	N	NNDN
Zbtb2	53.3815	-0.373293	0.282578	N	-0.529758	0.0620298	N	-0.61084	0.0344019	D	0.138949	0.695293	N	NNDN
Rabl2	53.7555	0.150544	0.71001	N	-0.505538	0.0676815	N	-0.703423	0.0101478	D	-0.55291	0.0393533	N	NNDN
Clec3b	55.9668	0.0529347	0.930851	N	0.0490759	0.914313	N	-0.919129	0.00382419	D	-0.2255	0.568166	N	NNDN
Vat1	58.3706	-0.302742	0.387513	N	-0.316478	0.289079	N	-0.737163	0.00593913	D	-0.188827	0.567725	N	NNDN
Hmces	58.4214	-0.10872	0.798937	N	-0.229474	0.449146	N	-0.614811	0.0204463	D	-0.146479	0.655677	N	NNDN
Impdh2-ps	58.5932	0.051414	0.917411	N	-0.126985	0.715427	N	-0.625232	0.0221201	D	-0.266379	0.379485	N	NNDN
Trmt112	58.602	-0.202647	0.558251	N	-0.546467	0.0256265	N	-0.963636	6.29e-05	D	-0.086953	0.80067	N	NNDN
Ust	60.7798	-0.583321	0.0234059	N	-0.547701	0.0205228	N	-0.816315	0.000527161	D	0.127202	0.673654	N	NNDN
Poc1b	61.0707	0.0368304	0.937444	N	-0.370272	0.153053	N	-0.680352	0.00543441	D	-0.553714	0.020088	N	NNDN
Psma5	61.6201	-0.339938	0.239076	N	-0.405667	0.095235	N	-0.675958	0.00381229	D	-0.579941	0.0101697	N	NNDN
Tln2	63.4682	-0.0873344	0.869301	N	-0.238593	0.503402	N	-0.686426	0.0235971	D	0.11025	0.786925	N	NNDN
Castor2	63.649	-0.158543	0.749587	N	-0.553361	0.0887422	N	-0.756827	0.016593	D	-0.0393648	0.938678	N	NNDN
Prkab2	63.8878	-0.547959	0.126576	N	-0.0079883	0.98742	N	-1.00977	0.000708404	D	0.250887	0.480815	N	NNDN
Snn	63.9027	0.228515	0.499869	N	-0.32166	0.248864	N	-0.749187	0.00316288	D	0.187451	0.530924	N	NNDN
Lrrc32	64.2149	-0.163945	0.756017	N	-0.208893	0.61466	N	-1.03951	0.00116587	D	-0.151091	0.731144	N	NNDN
Eipr1	64.2269	-0.3618	0.253601	N	-0.478462	0.0674447	N	-0.846613	0.000666996	D	-0.505156	0.0470796	N	NNDN
Ttll1	64.6257	-0.0791847	0.871131	N	-0.247858	0.444395	N	-0.657686	0.019173	D	0.102278	0.786635	N	NNDN
Mfng	64.9653	-0.513192	0.246372	N	-0.50227	0.193293	N	-0.802949	0.0252876	D	-0.656056	0.0664414	N	NNDN
Zfp367	65.2902	-0.346224	0.243974	N	-0.484326	0.0467816	N	-0.635707	0.00847786	D	-0.412783	0.0931417	N	NNDN
Entpd7	65.7211	-0.161651	0.723138	N	-0.411719	0.197792	N	-0.925087	0.00122263	D	-0.43423	0.163136	N	NNDN
Nsmce1	65.9845	-0.104364	0.812687	N	-0.280475	0.344264	N	-0.726433	0.00507139	D	-0.406877	0.134688	N	NNDN
Smyd5	66.0459	0.0902331	0.838609	N	0.137071	0.677148	N	-0.603335	0.0256772	D	0.193723	0.529678	N	NNDN
Csk	66.9629	-0.163776	0.691721	N	-0.12001	0.737862	N	-1.0212	9.26e-05	D	-0.371813	0.200574	N	NNDN
Itm2a	68.1362	-0.248524	0.630289	N	0.0173042	0.973736	N	-0.866694	0.0119078	D	-0.347925	0.380843	N	NNDN
Itga7	68.8921	-0.136886	0.71351	N	-0.265132	0.334725	N	-0.803282	0.000716406	D	-0.348388	0.176409	N	NNDN
Islr	69.6046	0.10526	0.788623	N	0.141477	0.637462	N	-0.70369	0.00379836	D	-0.308197	0.245197	N	NNDN
Pigl	71.8437	-0.284825	0.26118	N	-0.27258	0.221325	N	-0.644811	0.00151911	D	-0.286067	0.190813	N	NNDN
Man1b1	72.3991	-0.0568802	0.9157	N	-0.45997	0.118398	N	-0.620594	0.03085	D	-0.175204	0.621784	N	NNDN
Soga1	78.5529	0.241041	0.521943	N	-0.335629	0.273608	N	-0.800638	0.00303725	D	0.0608989	0.88313	N	NNDN
Tuba1b	79.3594	-0.375381	0.335857	N	-0.271905	0.448864	N	-0.727365	0.0167172	D	0.253631	0.472381	N	NNDN
Zfp182	79.9041	-0.188222	0.51219	N	-0.589056	0.00289579	N	-0.658816	0.00115513	D	-0.499222	0.0121942	N	NNDN
Hspa12b	81.5391	0.0248779	0.967262	N	-0.192281	0.597066	N	-0.686846	0.018904	D	-0.287959	0.388398	N	NNDN
Ctnnbip1	83.609	-0.298409	0.330859	N	-0.529024	0.0258991	N	-0.770229	0.000857608	D	-0.121121	0.698449	N	NNDN
Hist1h2be	83.6487	0.0154559	0.978014	N	-0.22556	0.47605	N	-0.659086	0.0132194	D	-0.00862919	0.985167	N	NNDN
Nr6a1	88.3762	-0.231925	0.574095	N	-0.149441	0.692164	N	-0.962718	0.000433396	D	-0.267917	0.423542	N	NNDN
E2f3	90.1044	-0.271006	0.502861	N	-0.524876	0.0786855	N	-0.860002	0.00198761	D	-0.383478	0.219746	N	NNDN
Slf2	90.2046	-0.492717	0.0432137	N	-0.435823	0.0525016	N	-0.602297	0.00584991	D	-0.261429	0.286697	N	NNDN
Zmat1	90.9198	-0.108274	0.832441	N	-0.436075	0.16761	N	-0.646622	0.0308036	D	-0.200844	0.585923	N	NNDN
Tuba1a	93.5787	-0.137235	0.69795	N	-0.588125	0.00829773	N	-0.630243	0.00535392	D	-0.360879	0.132134	N	NNDN
Zfyve1	95.1379	-0.0015094	0.997593	N	-0.425809	0.134326	N	-0.780074	0.00268385	D	-0.252823	0.418032	N	NNDN
Pi16	95.9748	-0.0557579	0.946439	N	-0.33597	0.498109	N	-0.999943	0.0126029	D	-0.584299	0.178057	N	NNDN
Tcaf1	97.5142	-0.466663	0.047606	N	-0.508869	0.0147081	N	-0.883237	1.04e-05	D	-0.319014	0.154695	N	NNDN
Umad1	102.164	-0.115889	0.695193	N	-0.232566	0.281049	N	-0.80635	1.11e-05	D	-0.524117	0.00408654	N	NNDN
Zbtb24	105.28	-0.146246	0.572401	N	-0.362283	0.0489873	N	-0.650594	0.000205426	D	-0.37953	0.0341557	N	NNDN
Edem2	107.106	-0.17495	0.501464	N	-0.42192	0.0229773	N	-0.677315	0.000156457	D	-0.596152	0.000580145	N	NNDN
Kctd3	109.285	-0.292901	0.302948	N	-0.443235	0.0509705	N	-0.663646	0.00213417	D	-0.454843	0.0395933	N	NNDN
Erlin1	110.968	-0.178558	0.548152	N	-0.247484	0.292671	N	-0.77856	8.63e-05	D	-0.53646	0.00701116	N	NNDN
Anxa1	114.618	-0.319476	0.442194	N	-0.342103	0.325253	N	-0.848018	0.00384018	D	-0.374464	0.26449	N	NNDN
Camk2g	117.962	-0.545232	0.00482059	N	-0.581182	0.00109714	N	-0.815321	3.61e-06	D	-0.48653	0.00653785	N	NNDN
Fam172a	118.692	-0.434161	0.083861	N	-0.490225	0.0243926	N	-0.640328	0.00247409	D	-0.506345	0.0166211	N	NNDN
Plekhg1	122.808	0.248433	0.505705	N	-0.413514	0.153032	N	-0.98854	9.63e-05	D	0.193269	0.560265	N	NNDN
Nupr1	125.685	-0.329764	0.356653	N	-0.451499	0.115855	N	-0.768281	0.00340491	D	-0.245876	0.444288	N	NNDN
Apold1	126.906	-0.349482	0.669268	N	-0.86638	0.124486	N	-1.26085	0.0157486	D	-0.0605876	0.945918	N	NNDN
Slc10a3	132.932	-0.0931223	0.823706	N	-0.191782	0.514517	N	-0.781437	0.000627908	D	-0.592416	0.0099667	N	NNDN
Commd7	133.68	-0.244611	0.22569	N	-0.517494	0.0007884	N	-0.782393	3.14e-07	D	-0.551691	0.000243503	N	NNDN
Gng11	135.143	-0.22924	0.485572	N	-0.499788	0.0351126	N	-0.632621	0.00600116	D	-0.100093	0.757046	N	NNDN
Klhl26	138.726	-0.143635	0.666283	N	-0.477139	0.0284125	N	-0.698347	0.000768402	D	-0.34967	0.123109	N	NNDN
Smarcc1	139.522	-0.292703	0.203415	N	-0.45024	0.0145027	N	-0.675756	0.000135171	D	-0.549368	0.00165501	N	NNDN
Nrbp1	141.941	-0.23078	0.418297	N	-0.355322	0.109716	N	-0.674077	0.000833436	D	-0.236133	0.322353	N	NNDN
Rgs19	143.261	-0.248113	0.300324	N	-0.576524	0.00116133	N	-1.02714	2.74e-09	D	-0.100711	0.682893	N	NNDN
Fbln5	144.915	-0.0807231	0.791861	N	-0.273448	0.164758	N	-0.817551	1.5e-06	D	-0.590988	0.000453912	N	NNDN
Ric8a	147.189	-0.0454235	0.904021	N	-0.323444	0.116403	N	-0.613473	0.00108656	D	-0.23217	0.286697	N	NNDN
Sltm	156.498	-0.529424	0.00169394	N	-0.460637	0.00429917	N	-0.622437	8.75e-05	D	-0.12469	0.55	N	NNDN
Pkia	158.769	-1.63213	0.0610922	N	0.236257	0.828868	N	-1.62773	0.0357225	D	0.185381	0.874889	N	NNDN
Spty2d1	160.661	-0.437459	0.0192753	N	-0.489812	0.00335178	N	-0.683833	2.65e-05	D	-0.552472	0.000592029	N	NNDN
Cavin3	164.974	0.0421026	0.921101	N	-0.138753	0.618714	N	-0.667083	0.00148988	D	0.0869817	0.77493	N	NNDN
Prkca	165.816	-0.375948	0.18254	N	-0.491228	0.0347505	N	-0.856416	6.34e-05	D	-0.219958	0.41719	N	NNDN
Prr13	166.579	0.21655	0.530319	N	-0.385177	0.141038	N	-0.805416	0.000488995	D	0.0209095	0.961234	N	NNDN
Emd	166.756	0.193992	0.680438	N	-0.153917	0.708165	N	-0.61974	0.0492661	D	-0.361083	0.291766	N	NNDN
Serpine2	177.579	-0.208231	0.443913	N	-0.255556	0.248918	N	-0.821147	7.08e-06	D	-0.416333	0.0334027	N	NNDN
Avl9	184.467	-0.259776	0.289216	N	-0.530906	0.0039601	N	-0.62299	0.000621462	D	-0.451588	0.0147266	N	NNDN
Rhoj	212.471	0.0747657	0.777629	N	-0.183553	0.319269	N	-0.650044	1.53e-05	D	-0.00561098	0.984382	N	NNDN
Spry4	217.333	-0.863312	0.207811	N	-0.937179	0.108686	N	-1.27609	0.0192178	D	-0.749102	0.211317	N	NNDN
S100a16	222.726	0.0167128	0.960421	N	-0.432336	0.00601325	N	-0.654477	1.39e-05	D	-0.328495	0.0427869	N	NNDN
Piezo1	236.194	-0.317436	0.506609	N	-0.302325	0.458032	N	-0.682948	0.0477162	D	-0.142756	0.758945	N	NNDN
Ptpn9	242.881	-0.267914	0.181392	N	-0.437574	0.00574111	N	-0.656783	1.32e-05	D	-0.517581	0.000592029	N	NNDN
Cmya5	274.671	-1.04415	0.236985	N	0.773581	0.33987	N	-1.53731	0.0283466	D	0.490628	0.579767	N	NNDN
Sdc2	282.099	-0.259156	0.500726	N	-0.595549	0.0285414	N	-0.671097	0.0112918	D	-0.512277	0.0602778	N	NNDN
Efemp1	291.254	-0.0930668	0.823706	N	-0.388027	0.12506	N	-1.21889	5.57e-09	D	-0.526945	0.0223872	N	NNDN
Chst11	300.899	-0.388332	0.392685	N	-0.318742	0.432898	N	-0.766205	0.0227131	D	-0.370251	0.338197	N	NNDN
Lasp1	310.311	-0.166818	0.667049	N	-0.514769	0.0431336	N	-0.74656	0.00157324	D	0.320523	0.23936	N	NNDN
Cmtm6	356.748	0.0106013	0.976931	N	-0.362762	0.0306883	N	-0.82662	2.59e-08	D	-0.391231	0.0150376	N	NNDN
Commd10	372.577	-0.275577	0.33114	N	-0.435657	0.0489746	N	-0.652839	0.00134583	D	-0.27357	0.252403	N	NNDN
Dync1i2	377.136	-0.109303	0.545442	N	-0.441132	0.000138829	N	-0.607662	7.46e-08	D	-0.404749	0.000421862	N	NNDN
Fndc3a	390.012	-0.119294	0.559793	N	-0.406908	0.00241939	N	-0.63677	5.15e-07	D	-0.582874	3.08e-06	N	NNDN
Apod	404.036	-0.251604	0.661474	N	-0.20773	0.672412	N	-1.04763	0.0027561	D	-0.620347	0.104853	N	NNDN
Ogn	427.399	-0.520409	0.196203	N	-0.447301	0.215353	N	-0.753501	0.0190608	D	-0.486753	0.159441	N	NNDN
Ap2a2	457.183	-0.102962	0.675988	N	-0.298209	0.0693984	N	-0.685419	1.42e-06	D	-0.250326	0.132897	N	NNDN
Sash1	468.323	-0.0743821	0.904316	N	-0.525052	0.118033	N	-0.908616	0.00227299	D	-0.347423	0.335633	N	NNDN
Rnf181	513.205	-0.0641557	0.814575	N	-0.234921	0.167783	N	-0.624677	1.05e-05	D	-0.421757	0.00414179	N	NNDN
Retnla	623.324	-0.635961	0.423509	N	-0.171219	0.836624	N	-1.23362	0.0339822	D	-0.764942	0.227605	N	NNDN
Hist1h1c	943.324	0.0953354	0.768777	N	-0.386753	0.0521597	N	-0.824224	1.57e-06	D	-0.377768	0.0517031	N	NNDN
Tank	1608.9	-0.488635	0.0174478	N	-0.572647	0.00158009	N	-0.603706	0.000672789	D	-0.541709	0.00228748	N	NNDN
Derl1	2072.01	-0.337333	0.029981	N	-0.464677	0.000428476	N	-0.713288	5.37e-09	D	-0.565402	5.6e-06	N	NNDN
Sik2	2755	-0.226215	0.207752	N	-0.489119	0.000243118	N	-0.646825	2.78e-07	D	-0.442386	0.000772429	N	NNDN
Adam19	68.6625	0.398827	0.221888	N	-0.299284	0.346504	N	-0.806187	0.00400081	D	0.752154	0.00156434	U	NNDU	YES	1	21831
Slc24a3	1049.45	-0.00463693	0.990715	N	-0.258091	0.23456	N	-0.364528	0.0713871	N	-0.77493	5.39e-06	D	NNND	YES	3	-27416	-1273	23591
Tob1	6044.72	0.0675648	0.899057	N	-0.0811396	0.834987	N	-0.102192	0.809455	N	-0.918565	0.000149454	D	NNND	YES	3	-28355	304	28582
Dolk	674.905	0.327136	0.197762	N	0.27876	0.222622	N	-0.336345	0.132617	N	-0.607723	0.00137696	D	NNND	YES	2	2964	4516
Car1	13.3835	-0.211199	0.815466	N	0.00559172	0.994529	N	-0.48113	0.492106	N	-1.41151	0.0122854	D	NNND	YES	2	8534	10106
Cdkn2c	699.66	-0.381342	0.18254	N	-0.0498223	0.884254	N	-0.27311	0.320791	N	-0.904081	1.1e-05	D	NNND	YES	2	9592	25339
Svep1	274.227	-0.833608	0.367155	N	-0.637008	0.448615	N	-0.852827	0.29025	N	-2.091	0.00101399	D	NNND	YES	2	-1264	29190
Ctdspl	608.589	-0.13775	0.750792	N	-0.424409	0.136825	N	-0.526501	0.05377	N	-0.710673	0.00421153	D	NNND	YES	2	-1509	23619
Prkar2b	15424.2	-0.226068	0.351795	N	-0.294013	0.134262	N	-0.226423	0.285131	N	-1.23998	2.6e-16	D	NNND	YES	2	-15323	15058
Cirbp	111.541	-0.501223	0.130558	N	-0.166881	0.643206	N	-0.415013	0.182619	N	-1.11474	1.04e-05	D	NNND	YES	2	-18834	-6794
Lpl	81862.2	-0.101338	0.701391	N	0.278559	0.115692	N	0.39324	0.0157349	N	-0.861433	1.02e-09	D	NNND	YES	2	-19564	-13888
Fbxo21	762.087	-0.113524	0.832441	N	-0.0697742	0.87557	N	-0.288599	0.441826	N	-1.12766	2.39e-05	D	NNND	YES	2	-9744	11533
Stx1b	103.63	0.302732	0.237632	N	0.084342	0.766579	N	-0.189665	0.491262	N	-1.32132	1.99e-11	D	NNND	YES	1	10534
Cmtm4	1349.75	-0.136473	0.705565	N	-0.0757856	0.814721	N	-0.321955	0.205849	N	-0.7385	0.000328081	D	NNND	YES	1	11439
Inca1	255.807	0.195209	0.560223	N	0.17699	0.537498	N	0.0114548	0.978391	N	-0.735511	0.000570504	D	NNND	YES	1	12080
Vamp3	1893.08	-0.205794	0.184178	N	-0.29845	0.0164005	N	-0.287682	0.0213265	N	-0.730225	6.91e-12	D	NNND	YES	1	13064
Cmbl	484.769	-0.519151	0.112637	N	-0.179325	0.616978	N	-0.525999	0.0689987	N	-1.76113	7.41e-14	D	NNND	YES	1	14896
Esyt1	140.866	0.0598665	0.90393	N	-0.225209	0.465785	N	-0.567962	0.028553	N	-1.10347	1.41e-06	D	NNND	YES	1	20447
Twist2	14.2007	-0.504316	0.392311	N	-0.74493	0.120308	N	-0.784657	0.1223	N	-1.52703	0.000917806	D	NNND	YES	1	21976
Dhrs7b	565.665	-0.164121	0.442194	N	-0.155833	0.396474	N	-0.480832	0.000916092	N	-0.85796	1.01e-10	D	NNND	YES	1	220
Ormdl3	909.155	-0.0166793	0.958513	N	-0.424646	0.00325082	N	-0.386872	0.00821289	N	-0.715362	4.26e-08	D	NNND	YES	1	2436
Chpt1	16118.7	-0.488589	0.0314775	N	-0.392967	0.0668173	N	-0.390624	0.0691354	N	-0.847323	2.68e-06	D	NNND	YES	1	2477
Anxa5	2011.35	0.0564219	0.742632	N	-0.102035	0.420863	N	-0.420286	8.43e-06	N	-0.634298	1.12e-12	D	NNND	YES	1	251
Naa30	620.785	-0.475489	0.0120965	N	-0.214941	0.292686	N	-0.273515	0.164974	N	-0.751059	1.71e-06	D	NNND	YES	1	25151
Pepd	351.306	-0.137891	0.669787	N	0.132579	0.62106	N	-0.291782	0.21631	N	-1.09721	1.39e-09	D	NNND	YES	1	26911
Akr1b3	36.6227	-0.331953	0.389292	N	-0.0346951	0.935779	N	-0.460823	0.167458	N	-0.690666	0.0180874	D	NNND	YES	1	29152
Ell2	946.58	-0.461004	0.0392893	N	-0.406864	0.0489873	N	-0.383585	0.0676593	N	-0.658173	0.000310622	D	NNND	YES	1	384
Cxcl9	176.647	-0.223075	0.657222	N	-0.592976	0.0807616	N	-0.379624	0.324944	N	-0.699241	0.028439	D	NNND	YES	1	5883
Podn	94.2551	0.0711729	0.919301	N	0.165716	0.732803	N	-0.509747	0.211692	N	-1.35647	4.1e-05	D	NNND	YES	1	7168
Cidea	12587	0.0253419	0.928447	N	0.0407215	0.841499	N	-0.260899	0.076995	N	-0.853843	4.87e-13	D	NNND	YES	1	8381
Ltc4s	83.1588	0.234866	0.55626	N	0.268415	0.41272	N	-0.562112	0.0611842	N	-0.825005	0.00212774	D	NNND	YES	1	9164
Sft2d3	95.207	-0.1608	0.647002	N	-0.28462	0.275654	N	-0.131613	0.693041	N	-0.669882	0.00225336	D	NNND	YES	1	-10360
C3	2898.44	0.0970003	0.803329	N	0.0218925	0.949657	N	-0.441377	0.0545276	N	-0.980388	4.1e-07	D	NNND	YES	1	-122
Prelp	2498.12	0.19819	0.668836	N	0.235879	0.524043	N	-0.338921	0.336597	N	-0.748605	0.00771352	D	NNND	YES	1	-12242
St3gal6	404.724	-0.22277	0.529596	N	-0.376913	0.157772	N	-0.469793	0.0666904	N	-0.893532	4.85e-05	D	NNND	YES	1	-123
Car13	915.068	-0.0604453	0.845211	N	-0.0307306	0.904335	N	-0.185382	0.372353	N	-0.750005	5.68e-07	D	NNND	YES	1	-12477
Nr4a1	2835.83	-0.435956	0.7854	N	-1.16686	0.275564	N	-1.78399	0.0670693	N	-1.98673	0.0311843	D	NNND	YES	1	-12792
Nnmt	504.301	0.11756	0.83238	N	0.285089	0.449156	N	-0.423143	0.230779	N	-2.20968	6.1e-17	D	NNND	YES	1	-13407
Tbl1xr1	345.031	0.175451	0.479909	N	-0.162041	0.452113	N	-0.00846571	0.979577	N	-0.662682	3.52e-05	D	NNND	YES	1	-1439
Apmap	3138.93	-0.0171098	0.962139	N	0.165115	0.415072	N	0.0804601	0.751086	N	-1.12066	2.07e-15	D	NNND	YES	1	-15589
Vsig10l	64.6681	0.305425	0.452608	N	-0.480557	0.140973	N	-0.466514	0.171386	N	-0.703976	0.0185589	D	NNND	YES	1	-16957
Tbc1d20	1832.06	0.120015	0.852173	N	0.206003	0.657596	N	-0.121362	0.830581	N	-0.814572	0.016542	D	NNND	YES	1	-18752
Lgals12	1686.46	-0.0541369	0.950718	N	-0.162526	0.774743	N	-0.255211	0.65806	N	-0.813445	0.0466079	D	NNND	YES	1	-198
Pum1	1059.03	-0.335639	0.022919	N	-0.271056	0.0529107	N	-0.398213	0.00197158	N	-0.742137	1.81e-10	D	NNND	YES	1	-22838
Eef2k	45.6903	-0.626953	0.146237	N	-0.387724	0.349058	N	-0.0946729	0.872333	N	-0.762113	0.0336138	D	NNND	YES	1	-23096
Picalm	2636.16	-0.0875768	0.718059	N	-0.0241283	0.91458	N	-0.0815707	0.711599	N	-0.747687	8.63e-09	D	NNND	YES	1	-262
Lpar6	1418.84	0.0548431	0.916324	N	-0.413468	0.148189	N	-0.0910191	0.830467	N	-0.683361	0.00605372	D	NNND	YES	1	-28408
Slc22a15	287.179	0.130042	0.749587	N	-0.400162	0.137754	N	-0.58272	0.0196508	N	-1.65051	2.1e-14	D	NNND	YES	1	-29435
Igfals	32.7566	-0.629338	0.391181	N	-0.666782	0.284852	N	-0.822434	0.180246	N	-1.56556	0.00302737	D	NNND	YES	1	-300
Fabp4	54412.6	-0.301356	0.0898145	N	-0.281523	0.0771847	N	-0.522393	0.000162819	N	-0.974081	1.87e-14	D	NNND	YES	1	-5333
Glce	137.834	-0.0784661	0.811069	N	-0.568474	0.00182187	N	-0.323266	0.123045	N	-0.612994	0.000535366	D	NNND	YES	1	-8374
Gm12996	10.0327	-0.522917	0.451691	N	-0.469702	0.436038	N	-0.638985	0.308162	N	-1.27419	0.0193106	D	NNND
4931428L18Rik	10.0639	-0.846107	0.369325	N	-0.574131	0.506053	N	-1.01403	0.221115	N	-1.76739	0.0170898	D	NNND
Gm20632	10.5057	-1.1123	0.0587681	N	-0.7323	0.182485	N	-0.672485	0.25923	N	-1.58499	0.00264684	D	NNND
Gm33699	10.6208	0.0993408	0.941717	N	-0.335779	0.714433	N	-1.00156	0.219474	N	-2.15246	0.00401116	D	NNND
AI838599	10.6452	-0.990474	0.28285	N	-0.464505	0.607653	N	-0.685224	0.450216	N	-2.53733	0.000991737	D	NNND
Gm45221	10.8549	-0.911916	0.381657	N	-1.22718	0.150557	N	-1.24828	0.157871	N	-1.62238	0.0450934	D	NNND
Gm17619	10.906	-0.545045	0.449663	N	-1.04025	0.0643867	N	-0.891941	0.141666	N	-1.89248	0.000758978	D	NNND
Gstp3	10.9114	-0.0489663	0.966091	N	-0.556951	0.393528	N	-0.646675	0.345889	N	-1.56837	0.00806578	D	NNND
Pde1c	11.19	-0.116218	0.914042	N	-1.0586	0.0791861	N	-0.801717	0.224955	N	-3.40837	6.24e-06	D	NNND
Ino80dos	11.2518	-0.612527	0.323792	N	-0.387502	0.500351	N	-0.503216	0.407214	N	-1.00913	0.0474092	D	NNND
Rpl28-ps1	11.3814	-0.214613	0.814042	N	-0.0147186	0.986297	N	-0.0297792	0.976124	N	-1.15834	0.04873	D	NNND
Gm16283	11.4661	-0.418888	0.601529	N	-0.274372	0.702894	N	-0.852026	0.185807	N	-1.24509	0.0317682	D	NNND
6330408M09Rik	11.7989	-0.429241	0.532405	N	-0.067601	0.921768	N	-0.869496	0.127744	N	-1.10135	0.0334978	D	NNND
AC166748.1	12.413	-0.483891	0.450668	N	-0.362308	0.525816	N	-0.614342	0.282036	N	-1.11795	0.0239424	D	NNND
Gm7008	12.4329	-0.224419	0.798937	N	-0.205233	0.771886	N	0.0130206	0.98969	N	-1.17862	0.0375513	D	NNND
1700112J16Rik	12.4721	-0.603517	0.364309	N	-0.540168	0.35439	N	-0.646864	0.288082	N	-1.33055	0.0112957	D	NNND
Zyg11a	12.5102	-0.895647	0.114353	N	-0.68634	0.186312	N	-0.70595	0.20102	N	-0.969373	0.0497069	D	NNND
Gm48990	12.6749	-0.877008	0.125878	N	-0.753641	0.144123	N	-0.318349	0.629489	N	-1.04122	0.0355836	D	NNND
Gm44763	12.7146	-0.637691	0.360841	N	-1.04733	0.0629301	N	-0.376557	0.602596	N	-1.34238	0.0139794	D	NNND
4930592C13Rik	12.7632	-0.0990501	0.912531	N	-0.560669	0.303796	N	-0.48289	0.428165	N	-1.69018	0.00100815	D	NNND
Gm45572	13.3165	-0.240127	0.800782	N	0.312955	0.653919	N	0.571002	0.377069	N	-1.50196	0.0150726	D	NNND
2510016D11Rik	13.3501	0.387964	0.54912	N	-0.293268	0.631754	N	-0.597078	0.321691	N	-1.05547	0.0422116	D	NNND
Teddm2	13.5884	-0.0055602	0.994434	N	0.0360068	0.957629	N	-0.169787	0.81311	N	-1.08753	0.0261071	D	NNND
Gm26797	13.9332	-0.0819496	0.931378	N	-0.468792	0.429609	N	-0.618838	0.309071	N	-1.76253	0.000879433	D	NNND
Gm48684	14.3507	-0.922356	0.0749442	N	-0.441554	0.389086	N	-0.337081	0.571506	N	-1.462	0.00137512	D	NNND
Syce2	14.5736	-0.302451	0.662135	N	-0.290686	0.61466	N	-0.601077	0.279196	N	-1.31393	0.0059866	D	NNND
9330162G02Rik	14.621	0.117893	0.881555	N	-0.425517	0.420373	N	-0.533306	0.334714	N	-1.15355	0.0138257	D	NNND
Gm11865	14.741	-0.277798	0.661864	N	-0.439192	0.370728	N	-0.776659	0.110997	N	-1.2768	0.00372572	D	NNND
Zdbf2	14.878	-0.896415	0.0925964	N	-0.650222	0.188861	N	-0.238528	0.716404	N	-1.15378	0.0125077	D	NNND
4933406I18Rik	15.0984	-0.68013	0.301352	N	-0.42111	0.495117	N	-0.320019	0.655907	N	-1.25613	0.01677	D	NNND
BC028777	15.1777	-0.252342	0.725792	N	-0.66415	0.196807	N	-0.287164	0.661735	N	-1.45636	0.00251051	D	NNND
Susd2	15.6651	0.239117	0.733274	N	-0.260242	0.662862	N	-0.590911	0.297724	N	-1.18032	0.0152439	D	NNND
Pih1d2	15.7125	-0.00741038	0.993198	N	-0.305585	0.602422	N	-0.30444	0.64427	N	-1.13725	0.0201515	D	NNND
Igkc	15.7668	-1.0609	0.199963	N	-0.957478	0.19069	N	-1.33909	0.0609869	N	-1.44566	0.0317089	D	NNND
Grhl1	15.941	-0.389459	0.491888	N	-0.448217	0.339317	N	-0.872102	0.0567689	N	-1.17883	0.00491575	D	NNND
Ppp4r4	16.0947	-0.279957	0.662454	N	-0.190746	0.734397	N	0.0955472	0.89153	N	-1.26089	0.00494559	D	NNND
Ttll11	16.1898	0.113796	0.901877	N	-0.233898	0.720434	N	-0.292472	0.678769	N	-1.0557	0.0422199	D	NNND
9230116N13Rik	16.615	-0.428988	0.476424	N	-0.504219	0.311037	N	-0.599156	0.24721	N	-0.902442	0.0469582	D	NNND
Accsl	16.6256	-0.867662	0.097309	N	-0.442671	0.393706	N	-0.529086	0.32433	N	-2.09624	9.47e-06	D	NNND
Fbxw9	16.7141	0.0313537	0.968559	N	-0.271729	0.577965	N	-0.796224	0.0778496	N	-0.966658	0.0186241	D	NNND
Cxxc4	17.3931	-0.880876	0.0771509	N	-0.831144	0.063329	N	-0.784526	0.0989009	N	-1.30004	0.00231495	D	NNND
Map3k7cl	17.7052	-0.103415	0.885169	N	-0.560753	0.197834	N	-0.776308	0.0810774	N	-1.33736	0.000956475	D	NNND
Arsg	18.4149	-0.606598	0.231752	N	0.121337	0.823245	N	-0.129557	0.840812	N	-1.34474	0.00127693	D	NNND
Gm26725	18.6871	-0.150018	0.882695	N	-0.363337	0.601605	N	-0.887126	0.156163	N	-1.2433	0.0271126	D	NNND
Fam181b	18.8949	-0.413521	0.534474	N	-0.904205	0.0688849	N	0.0904781	0.908522	N	-1.27076	0.00758617	D	NNND
AC158549.1	19.3037	0.437947	0.554946	N	0.765566	0.161484	N	0.118456	0.894845	N	-1.15746	0.0450369	D	NNND
2810403D21Rik	19.3385	-0.297589	0.606123	N	0.0115302	0.98544	N	-0.117909	0.854702	N	-1.17032	0.00405241	D	NNND
Kcnc2	19.4473	0.336452	0.558251	N	-0.189371	0.736403	N	-0.199994	0.754571	N	-0.89022	0.0461824	D	NNND
Slc25a53	19.6589	-0.225729	0.691833	N	-0.518012	0.212794	N	-0.218085	0.686241	N	-0.769321	0.0493228	D	NNND
Chst8	20.0878	0.271094	0.751087	N	0.103406	0.893785	N	-0.351264	0.646024	N	-2.54628	1.91e-05	D	NNND
Fbp1	20.3126	-0.248596	0.782228	N	-0.812306	0.173009	N	-0.389743	0.598849	N	-1.88962	0.000506108	D	NNND
Gm26697	20.3746	-0.44829	0.505285	N	0.343043	0.54603	N	-0.313841	0.639794	N	-1.13037	0.0215163	D	NNND
Actg2	21.0659	0.307865	0.608592	N	0.458841	0.317837	N	-0.0309988	0.968724	N	-1.07442	0.016643	D	NNND
Dok6	21.4246	-0.0155439	0.986383	N	-0.700416	0.201564	N	-0.709471	0.215963	N	-1.01641	0.0461772	D	NNND
4930577N17Rik	21.9923	0.122707	0.846829	N	-0.254159	0.584935	N	-0.0976949	0.874004	N	-1.08188	0.00463988	D	NNND
Stmn2	22.533	-0.0170618	0.981067	N	-0.35257	0.418939	N	0.133037	0.814885	N	-0.859693	0.0242921	D	NNND
Tmem67	22.8179	-0.117312	0.833504	N	-0.511019	0.150881	N	-0.623994	0.0938707	N	-0.682034	0.0448982	D	NNND
Gm45412	22.8883	-0.188534	0.730729	N	-0.292731	0.491434	N	-0.121846	0.830355	N	-1.101	0.00209072	D	NNND
Rbm48	23.3489	-0.0851582	0.900109	N	-0.409456	0.32039	N	-0.262413	0.597433	N	-0.901794	0.0139063	D	NNND
Prss8	23.9271	-0.277533	0.81195	N	-0.50827	0.545252	N	-1.29374	0.0748549	N	-2.42814	0.000235951	D	NNND
C030010L15Rik	23.9389	0.128763	0.886355	N	0.21745	0.736416	N	0.259039	0.709687	N	-1.02531	0.0461585	D	NNND
Zfp53	24.4168	-0.194484	0.737786	N	-0.10284	0.841374	N	-0.377932	0.42023	N	-0.807097	0.0335486	D	NNND
Gm6288	24.4322	-0.548481	0.233463	N	-0.325564	0.457973	N	-0.582552	0.16449	N	-1.38573	0.000145428	D	NNND
Mlkl	25.1818	-0.356453	0.399942	N	-0.561134	0.0977502	N	-0.62867	0.0779603	N	-0.677097	0.0385819	D	NNND
Mrps18c	25.1871	-0.218043	0.664444	N	-0.139725	0.752786	N	-0.449116	0.262353	N	-0.721646	0.036006	D	NNND
Slc22a2	25.2585	-0.294262	0.629152	N	0.0403555	0.946793	N	0.0333969	0.964209	N	-1.19867	0.00350568	D	NNND
Sec16b	25.4215	-0.0984522	0.884841	N	-0.0272518	0.961024	N	-0.128243	0.830355	N	-0.836055	0.028439	D	NNND
Eva1a	25.6261	0.104393	0.865496	N	-0.509297	0.190605	N	-0.217941	0.665233	N	-1.00286	0.00480394	D	NNND
Gm26588	25.7346	-0.0717193	0.918362	N	-0.4443	0.288914	N	-0.511577	0.239669	N	-0.996538	0.00707383	D	NNND
Tctn2	27.246	-0.20464	0.687577	N	-0.160538	0.716065	N	-0.52628	0.171159	N	-0.968848	0.00363904	D	NNND
Fmo4	27.3546	-0.778772	0.0751167	N	-0.611841	0.131352	N	-0.619248	0.143982	N	-1.57299	2.02e-05	D	NNND
1700055D18Rik	27.8749	-0.319057	0.55392	N	-0.463937	0.27606	N	-0.782535	0.0554928	N	-0.861951	0.0231294	D	NNND
6430573P05Rik	29.0249	-0.306929	0.565053	N	-0.323523	0.467511	N	-0.432643	0.336421	N	-1.39857	0.000121937	D	NNND
Naalad2	29.1004	-0.524325	0.203415	N	-0.568757	0.108686	N	-0.51383	0.178108	N	-0.6714	0.0490336	D	NNND
Gm48529	29.6108	0.250692	0.68224	N	0.211433	0.688617	N	0.105922	0.873975	N	-1.00401	0.016226	D	NNND
Frmd8os	29.9469	-0.200217	0.658011	N	-0.0734357	0.861868	N	-0.488207	0.159891	N	-0.748179	0.0136721	D	NNND
2700046G09Rik	30.2353	-0.204506	0.694333	N	-0.352211	0.370728	N	-0.213718	0.656285	N	-1.30718	9.35e-05	D	NNND
A930012O16Rik	30.7512	-0.409977	0.37299	N	-0.438666	0.262812	N	-0.464933	0.257105	N	-0.862714	0.0128883	D	NNND
AC169509.1	31.0635	-0.30068	0.537084	N	-0.0286747	0.956116	N	-0.186231	0.710925	N	-0.72776	0.0385141	D	NNND
Gm26534	31.1816	0.0551605	0.929342	N	-0.199946	0.626914	N	-0.679862	0.0566463	N	-0.725065	0.0280979	D	NNND
1700087I21Rik	31.2907	-0.260102	0.677454	N	-0.0583372	0.921382	N	-0.566059	0.23223	N	-1.2636	0.00153659	D	NNND
Sh3d21	31.3255	-0.56481	0.264474	N	-0.570859	0.193669	N	-0.419215	0.395988	N	-1.12341	0.00396711	D	NNND
Reck	32.0006	-0.386296	0.448513	N	-0.465538	0.266406	N	-0.189587	0.730429	N	-0.792635	0.0355221	D	NNND
Gm11837	32.2585	-0.501972	0.402192	N	-0.630453	0.199958	N	-0.365853	0.533826	N	-1.07375	0.0149597	D	NNND
Gm32031	32.5781	-0.297287	0.484237	N	-0.317157	0.372409	N	-0.499131	0.153234	N	-1.03343	0.000572218	D	NNND
1810010H24Rik	32.6157	-0.500502	0.333571	N	-0.354725	0.45652	N	-0.605688	0.176874	N	-1.46675	0.000123236	D	NNND
Cfap126	32.7971	-0.178533	0.696187	N	-0.382068	0.251698	N	-0.630188	0.0524528	N	-1.10493	0.000150636	D	NNND
Tmtc2	33.5343	0.0277389	0.975617	N	-0.808398	0.0662052	N	-0.232074	0.701993	N	-0.889645	0.0363858	D	NNND
Lrrn4cl	33.6282	0.216614	0.73772	N	-0.0394496	0.949657	N	-0.244284	0.679568	N	-1.05181	0.0108576	D	NNND
Nrn1	33.637	0.0356922	0.960503	N	-0.311527	0.463948	N	-0.676386	0.0817269	N	-1.21872	0.000407259	D	NNND
Slc26a10	33.6654	0.384807	0.351156	N	-0.129933	0.771632	N	-0.136011	0.792001	N	-1.28017	0.000106422	D	NNND
Epb41l4b	33.9911	-0.425858	0.442194	N	-0.539367	0.231884	N	-0.665648	0.14026	N	-0.816809	0.0467417	D	NNND
AC139296.1	34.2036	-0.181812	0.680497	N	0.149875	0.68349	N	-0.23698	0.547546	N	-0.647674	0.0291647	D	NNND
Gm43254	35.1392	-0.238341	0.586996	N	-0.216851	0.563449	N	-0.599576	0.0715331	N	-0.829486	0.00544786	D	NNND
Cldn22	35.4711	-0.355365	0.677785	N	-0.40803	0.555857	N	-0.517843	0.46021	N	-1.82488	0.000568656	D	NNND
Gm37670	36.2723	-0.0914615	0.878065	N	0.20954	0.600862	N	0.192988	0.670418	N	-0.693252	0.0397601	D	NNND
Suv39h1	37.2081	-0.163519	0.763898	N	-0.394613	0.302534	N	-0.442085	0.264421	N	-0.954846	0.00364261	D	NNND
Vcpkmt	37.7309	-0.0189689	0.977184	N	-0.0176568	0.969736	N	-0.538071	0.123286	N	-0.817887	0.00772366	D	NNND
Trmt6	38.0024	-0.347039	0.388541	N	-0.387859	0.253339	N	-0.21224	0.614395	N	-0.634474	0.0398613	D	NNND
4933406P04Rik	38.3813	-0.143142	0.739684	N	-0.482304	0.0946575	N	-0.485242	0.113573	N	-1.00825	0.000139406	D	NNND
Mdrl	38.6751	-0.597792	0.129737	N	0.0045777	0.992916	N	0.0964202	0.856579	N	-1.05148	0.00107439	D	NNND
Rpl9	38.8222	-0.364973	0.372052	N	-0.355362	0.315264	N	-0.553201	0.10762	N	-0.7303	0.0178794	D	NNND
Gsto2	39.7862	0.277128	0.521211	N	-0.112831	0.793388	N	0.200143	0.644754	N	-0.683301	0.0355836	D	NNND
Glb1l	40.4717	0.112105	0.826188	N	0.0371518	0.93325	N	-0.230004	0.577553	N	-0.661519	0.0308285	D	NNND
D830050J10Rik	40.7676	-0.413944	0.256793	N	-0.294027	0.386102	N	-0.285511	0.437922	N	-0.665777	0.0216649	D	NNND
Gm6658	40.795	-0.508152	0.204959	N	-0.412091	0.256125	N	-0.493121	0.179082	N	-1.03467	0.000871793	D	NNND
Polg2	41.0043	-0.287658	0.510499	N	-0.356369	0.316629	N	-0.164423	0.72002	N	-0.626016	0.0486953	D	NNND
Cth	41.4758	-0.871849	0.113117	N	0.122899	0.850355	N	0.197688	0.777355	N	-1.74498	8.11e-05	D	NNND
Accs	41.5043	-0.411431	0.33509	N	-0.580781	0.0934	N	-0.437549	0.253483	N	-0.835392	0.00930088	D	NNND
Cadm1	41.7672	-0.310122	0.509338	N	-0.307207	0.441301	N	0.15393	0.754416	N	-0.708833	0.0360399	D	NNND
Acot1	42.0899	-0.5279	0.711936	N	-1.05203	0.310541	N	-0.81408	0.477052	N	-2.91622	0.000603706	D	NNND
Trmt11	42.4249	-0.466185	0.211801	N	-0.526157	0.0986552	N	-0.218893	0.595614	N	-0.757693	0.0105743	D	NNND
Gm11826	43.0524	-0.021932	0.975036	N	-0.296737	0.44573	N	-0.249304	0.571675	N	-0.867576	0.00649818	D	NNND
Rbm34	43.7637	-0.281048	0.550695	N	-0.564749	0.105859	N	-0.29261	0.492154	N	-0.816656	0.011509	D	NNND
Cd46	43.8465	-0.112188	0.855727	N	-0.664836	0.0647788	N	-0.468598	0.24277	N	-0.79168	0.0210582	D	NNND
Klhl15	44.3917	-0.418145	0.229316	N	-0.518751	0.0755282	N	-0.425098	0.18149	N	-0.781927	0.0039331	D	NNND
Rpgr	44.555	-0.0874022	0.881046	N	-0.506528	0.136826	N	-0.36933	0.334714	N	-0.863631	0.00507079	D	NNND
Dtwd2	45.2017	-0.199654	0.649676	N	-0.178564	0.628967	N	-0.408056	0.228516	N	-0.757309	0.00803875	D	NNND
Abcb1b	45.2077	-0.317794	0.442485	N	-0.547683	0.0852291	N	-0.509461	0.130547	N	-1.41953	8.29e-07	D	NNND
3930402G23Rik	45.6708	0.0676859	0.965724	N	-1.15445	0.140973	N	-1.12345	0.161354	N	-1.84293	0.00859964	D	NNND
Gm11266	45.7023	-0.339067	0.616523	N	-0.414724	0.446178	N	-0.020795	0.979867	N	-1.17363	0.00761513	D	NNND
Zfp119a	46.6215	-0.257422	0.481983	N	-0.554749	0.0407351	N	-0.218279	0.536456	N	-0.751475	0.00344228	D	NNND
A430035B10Rik	47.0465	-0.534063	0.0985079	N	-0.376659	0.218736	N	-0.321705	0.338555	N	-0.732523	0.0066843	D	NNND
Ttyh2	48.5313	-0.617795	0.0815957	N	-0.306223	0.395696	N	-0.589522	0.0742491	N	-0.888528	0.00248982	D	NNND
Klhdc8b	48.7631	0.539894	0.0712946	N	0.316978	0.298442	N	-0.0323844	0.949182	N	-0.9999	0.000287685	D	NNND
Zfp619	49.2311	-0.37112	0.257395	N	-0.266749	0.379536	N	-0.226608	0.509294	N	-0.644722	0.0120529	D	NNND
Lrp11	49.6418	-0.25518	0.551283	N	-0.154423	0.695234	N	-0.48074	0.153186	N	-0.894125	0.00187158	D	NNND
Cmc4	49.7309	-0.485216	0.227962	N	-0.464193	0.188618	N	-0.210177	0.640969	N	-0.701205	0.0291665	D	NNND
Bbs4	50.023	-0.278472	0.496878	N	-0.251459	0.475882	N	0.0318499	0.951844	N	-1.20927	1.47e-05	D	NNND
Clec14a	51.0222	0.283438	0.42626	N	-0.0791258	0.835969	N	-0.0679337	0.881906	N	-1.01613	0.000114853	D	NNND
Psme2	51.6355	-0.357991	0.553343	N	-0.513734	0.278456	N	-0.502303	0.311117	N	-0.890082	0.0327327	D	NNND
Prickle2	52.7293	-0.327612	0.496084	N	-0.649445	0.068598	N	-0.109571	0.841345	N	-0.729381	0.0329571	D	NNND
Cerkl	52.8853	0.109714	0.806517	N	-0.192805	0.561611	N	-0.420893	0.164974	N	-0.854361	0.00087536	D	NNND
AC165962.1	52.9559	-0.377837	0.245482	N	-0.418303	0.132171	N	-0.583196	0.0328762	N	-0.741727	0.00302737	D	NNND
B930094E09Rik	54.3085	-0.33999	0.409866	N	-0.196067	0.614349	N	-0.463243	0.179697	N	-1.33982	3.07e-06	D	NNND
Gm16589	55.3105	-0.0521604	0.912177	N	-0.238077	0.412139	N	-0.100766	0.792955	N	-0.887476	0.000162836	D	NNND
Ccdc62	55.4787	-0.392573	0.290792	N	-0.173343	0.641088	N	-0.00179851	0.997935	N	-0.972827	0.000429865	D	NNND
Mfsd4b3	55.8853	-0.0150624	0.979126	N	-0.191256	0.595579	N	-0.575642	0.0592545	N	-1.28582	1.74e-06	D	NNND
Rpl39-ps	56.5024	-0.315613	0.404099	N	-0.306113	0.347222	N	0.0890318	0.842144	N	-0.667951	0.016542	D	NNND
Olfr78	57.2256	-0.226169	0.642657	N	-0.336156	0.370482	N	-0.11359	0.824685	N	-0.896795	0.00377087	D	NNND
A430018G15Rik	58.7677	-0.337866	0.419334	N	-0.508134	0.122665	N	-0.510895	0.134921	N	-0.653795	0.033791	D	NNND
Gm10419	59.8337	-0.798043	0.100195	N	-0.404432	0.411852	N	-0.359645	0.502672	N	-0.98472	0.014811	D	NNND
Chrna2	62.0151	-0.560393	0.382868	N	-0.310973	0.613174	N	-0.295796	0.661176	N	-2.24622	3.73e-07	D	NNND
Gm5637	62.1681	0.524567	0.0640746	N	0.0434317	0.908945	N	-0.44513	0.134609	N	-0.658988	0.011496	D	NNND
Clec1a	63.0159	-0.387115	0.323792	N	-0.208538	0.583676	N	0.14038	0.753664	N	-0.648013	0.031822	D	NNND
Gm16464	63.3832	-0.493769	0.044652	N	-0.315222	0.189283	N	-0.432206	0.0704275	N	-0.637791	0.0025282	D	NNND
Camkmt	63.6895	0.0563848	0.93668	N	-0.00223128	0.99693	N	-0.088856	0.881172	N	-0.76794	0.0319527	D	NNND
Cul7	64.0228	-0.16375	0.768777	N	-0.435538	0.250241	N	-0.676673	0.0573613	N	-1.05187	0.00094225	D	NNND
Rpp38	65.7337	0.179732	0.618539	N	0.161846	0.598899	N	-0.0712217	0.863569	N	-0.724038	0.00268201	D	NNND
Ednra	67.336	-0.453447	0.13572	N	-0.53309	0.0406506	N	-0.256483	0.422686	N	-0.656938	0.00774256	D	NNND
Psen2	67.3841	-0.144917	0.691631	N	-0.191875	0.505852	N	-0.523197	0.0363444	N	-0.62674	0.00631107	D	NNND
Ccdc73	67.4216	-0.372868	0.351579	N	-0.463003	0.159704	N	-0.44324	0.196874	N	-1.19854	2.05e-05	D	NNND
Armcx5	68.1025	-0.548354	0.0328797	N	-0.37226	0.134841	N	-0.498679	0.0424816	N	-0.689253	0.00185219	D	NNND
Ift22	71.3686	-0.221621	0.518588	N	-0.262648	0.349633	N	-0.4743	0.0694746	N	-1.00645	8.59e-06	D	NNND
Mgat4a	73.7237	-0.0939714	0.791306	N	-0.430694	0.049443	N	-0.371083	0.117795	N	-0.625727	0.00216003	D	NNND
Ift81	73.7291	-0.440952	0.10661	N	-0.398315	0.106788	N	-0.334093	0.212046	N	-0.950436	1.16e-05	D	NNND
Taf7	74.5501	0.265955	0.393575	N	-0.472168	0.0594682	N	-0.057912	0.886404	N	-0.636664	0.00658472	D	NNND
C130013H08Rik	75.589	0.12385	0.737442	N	-0.300653	0.253309	N	-0.563527	0.0203875	N	-0.893437	4.76e-05	D	NNND
Gm9905	76.2473	-0.358503	0.312046	N	-0.142713	0.694394	N	-0.214962	0.558208	N	-0.9999	8.8e-05	D	NNND
Rad9b	76.9513	-0.11375	0.787503	N	-0.332395	0.238234	N	-0.307298	0.308437	N	-1.08527	3.43e-06	D	NNND
Gm37607	77.4251	0.0796148	0.914144	N	-0.392613	0.372136	N	-0.648516	0.111647	N	-0.987236	0.00604925	D	NNND
Vwa3a	77.693	0.0188862	0.978407	N	-0.0889896	0.852409	N	-0.574073	0.118746	N	-0.828179	0.0112259	D	NNND
Hmgb1	78.2069	-0.317737	0.229061	N	-0.542448	0.00938127	N	-0.473373	0.0328698	N	-0.967515	7.97e-07	D	NNND
Cdnf	79.1153	-0.153512	0.771376	N	-0.425038	0.235975	N	-0.115056	0.820394	N	-1.00517	0.000842495	D	NNND
Ppil1	79.5347	0.181649	0.658011	N	-0.127051	0.729635	N	-0.135265	0.739747	N	-0.640318	0.0169375	D	NNND
Fbxo36	79.6059	0.0113706	0.981203	N	0.156476	0.626914	N	-0.196118	0.571537	N	-0.996663	2.99e-05	D	NNND
1810043G02Rik	79.6593	0.0121807	0.978407	N	-0.339883	0.136622	N	-0.443082	0.051273	N	-0.794358	6.7e-05	D	NNND
Tvp23b	81.8471	-0.0300381	0.944877	N	0.00612304	0.986058	N	-0.39508	0.093967	N	-0.621913	0.00250775	D	NNND
Pi4k2b	85.1031	-0.336694	0.237461	N	-0.299211	0.238447	N	-0.402659	0.106289	N	-0.725423	0.00069816	D	NNND
Aatf	86.9508	-0.159264	0.762496	N	0.119474	0.785003	N	-0.107214	0.836748	N	-0.683361	0.0329937	D	NNND
Gm36816	88.9754	-0.233791	0.500442	N	0.0901311	0.787349	N	-0.147881	0.673656	N	-0.728904	0.00182129	D	NNND
Hdac6	89.6008	-0.0627048	0.907373	N	-0.0647931	0.87235	N	-0.563907	0.0535984	N	-0.646871	0.0171808	D	NNND
Tceanc	90.7221	-0.406716	0.327312	N	-0.493645	0.150881	N	-0.108546	0.831975	N	-1.11621	0.000137523	D	NNND
Leprot	92.9141	0.00893888	0.982197	N	-0.333	0.14095	N	-0.553423	0.00938121	N	-0.783887	6.02e-05	D	NNND
Trdmt1	97.6429	-0.511192	0.278915	N	-0.435453	0.302769	N	-0.145859	0.798545	N	-0.7469	0.0430914	D	NNND
Upf3b	97.995	-0.252412	0.353379	N	-0.485721	0.0185741	N	-0.311609	0.183282	N	-0.652729	0.000777385	D	NNND
Gpr160	98.9949	-0.098877	0.826379	N	0.0423475	0.909778	N	0.542061	0.0318479	N	-0.804559	0.000988574	D	NNND
2310010J17Rik	99.301	-0.225289	0.55543	N	-0.380311	0.191108	N	-0.239314	0.481928	N	-0.921982	0.000164382	D	NNND
Gm9105	99.718	-0.250244	0.366632	N	-0.34187	0.127828	N	-0.41941	0.0608568	N	-0.747262	0.000123969	D	NNND
Vegfd	100.288	-0.486333	0.265136	N	-0.116427	0.808926	N	-0.400529	0.326957	N	-1.3239	2.31e-05	D	NNND
3110001I22Rik	103.549	-0.091777	0.89254	N	-0.110797	0.826039	N	-0.354453	0.422845	N	-0.963886	0.00427493	D	NNND
Anxa3	103.836	-0.120465	0.750667	N	-0.302326	0.25183	N	-0.444808	0.077936	N	-0.66251	0.0030096	D	NNND
Agbl3	104.153	-0.109111	0.74513	N	-0.296819	0.1969	N	-0.133304	0.652854	N	-1.09408	1.08e-08	D	NNND
Rnf113a2	107.152	-0.323645	0.240547	N	-0.479694	0.0306883	N	-0.59978	0.00587459	N	-0.701855	0.000608057	D	NNND
Abhd18	107.912	0.0552706	0.925481	N	-0.0849318	0.843962	N	-0.121854	0.79503	N	-0.68126	0.0219095	D	NNND
Gm18284	108.483	-0.21986	0.499869	N	-0.363434	0.144011	N	-0.279832	0.309889	N	-0.612474	0.00557363	D	NNND
Rilpl2	112.93	-0.249353	0.617389	N	0.0423327	0.932653	N	-0.557829	0.122576	N	-0.933432	0.00287106	D	NNND
Ggh	113.287	-0.468699	0.0936231	N	-0.577054	0.0156529	N	-0.405516	0.123632	N	-1.0694	8.36e-07	D	NNND
1110059G10Rik	114.127	-0.369496	0.185288	N	-0.473762	0.0412357	N	-0.196022	0.509908	N	-0.694623	0.00110287	D	NNND
Cep83os	115.197	-0.229871	0.554188	N	-0.35959	0.230698	N	-0.260852	0.439672	N	-0.678558	0.00859309	D	NNND
Cdkl2	117.51	-0.309128	0.152597	N	-0.174741	0.410988	N	-0.263767	0.198158	N	-1.03026	3.11e-10	D	NNND
Orc6	117.904	-0.177859	0.578418	N	-0.100118	0.73592	N	-0.493694	0.0291145	N	-0.759983	0.000181052	D	NNND
Acot4	118.836	-0.451263	0.562636	N	-0.558557	0.373785	N	-0.6693	0.279828	N	-1.31335	0.0101831	D	NNND
Atg7	119.613	-0.0856681	0.772977	N	0.086631	0.718186	N	-0.303367	0.132977	N	-0.698312	3e-05	D	NNND
Bpgm	120.51	0.172822	0.668226	N	0.126836	0.72011	N	-0.0614177	0.890598	N	-0.624681	0.0153963	D	NNND
Zfp229	121.376	-0.210522	0.590814	N	-0.341854	0.252033	N	-0.054227	0.905088	N	-0.721805	0.00420897	D	NNND
Gm6142	121.45	-0.265915	0.383431	N	-0.363338	0.139928	N	-0.0453892	0.908509	N	-0.630089	0.00377087	D	NNND
C920006O11Rik	122.908	-0.351523	0.359247	N	-0.202982	0.579317	N	-0.0432597	0.933466	N	-0.624529	0.0286391	D	NNND
Zbtb11os1	124.178	-0.0955047	0.796274	N	-0.029168	0.928461	N	-0.361465	0.133274	N	-0.945282	1.82e-06	D	NNND
Gm13111	127.113	0.382922	0.28285	N	-0.178635	0.624655	N	-0.214092	0.576556	N	-0.865414	0.00109852	D	NNND
Trappc6b	127.296	-0.200188	0.451307	N	-0.14863	0.533717	N	-0.300079	0.166723	N	-0.796111	6.42e-06	D	NNND
Colca2	127.486	-0.024998	0.957782	N	0.12055	0.680868	N	-0.397329	0.102775	N	-0.723231	0.000526287	D	NNND
Hnrnph2	127.694	0.0134881	0.978014	N	-0.392556	0.0959485	N	-0.544623	0.0157388	N	-0.929541	4.64e-06	D	NNND
Eid1	135.608	-0.280579	0.337982	N	-0.330523	0.174991	N	-0.43264	0.0678994	N	-0.639504	0.00239114	D	NNND
5031425E22Rik	137.932	-0.249669	0.323499	N	-0.503675	0.00810723	N	-0.319438	0.138414	N	-0.713979	6.11e-05	D	NNND
Gstt1	138.903	-0.12712	0.758631	N	-0.374576	0.17459	N	-0.213741	0.519271	N	-0.746412	0.00161906	D	NNND
Scfd1	141.488	-0.523846	0.0361261	N	-0.515168	0.022728	N	-0.382168	0.120957	N	-0.657963	0.00186652	D	NNND
Crebzf	142.389	-0.220422	0.307692	N	-0.255468	0.159704	N	-0.3382	0.0585247	N	-0.632239	4.12e-05	D	NNND
Smad3	143.916	0.0339938	0.92828	N	-0.29286	0.160981	N	-0.278378	0.205763	N	-0.689269	0.000101348	D	NNND
Kdm3a	148.493	-0.468712	0.060344	N	-0.352189	0.135071	N	-0.540215	0.0139023	N	-0.643392	0.00174222	D	NNND
Mbtd1	150.275	-0.303945	0.230204	N	-0.28216	0.206987	N	-0.215667	0.387057	N	-0.648953	0.000550104	D	NNND
Slc20a2	152.48	-0.227819	0.467061	N	-0.0516384	0.87557	N	-0.343948	0.169958	N	-1.00256	6.68e-07	D	NNND
Gstt2	156.65	0.250321	0.546844	N	0.232909	0.511439	N	0.389881	0.229653	N	-0.76877	0.00544786	D	NNND
Slc30a1	158.041	-0.333869	0.174006	N	-0.36177	0.0857618	N	-0.40371	0.0555769	N	-0.646215	0.000507494	D	NNND
Ttc8	160.866	-0.40129	0.212717	N	-0.528578	0.0458495	N	-0.50018	0.0653621	N	-0.685994	0.00509393	D	NNND
Echdc2	161.574	-0.33912	0.157578	N	-0.211292	0.360066	N	-0.44846	0.0266721	N	-0.843284	2.25e-06	D	NNND
2810402E24Rik	168.487	-0.279866	0.304281	N	-0.456217	0.0324119	N	-0.205577	0.437922	N	-1.25523	1.8e-11	D	NNND
Tusc3	170.078	-0.0815884	0.903431	N	-0.0197803	0.970123	N	-0.534225	0.154843	N	-1.07212	0.000648481	D	NNND
Agtr1a	172.082	-0.469201	0.02894	N	-0.245931	0.266255	N	-0.331857	0.121114	N	-0.910514	1.9e-07	D	NNND
Gnpda2	172.893	-0.302119	0.247965	N	-0.454104	0.0298391	N	-0.413273	0.0571002	N	-0.916218	7.52e-07	D	NNND
Firre	175.013	-0.181405	0.510499	N	-0.345202	0.0909666	N	-0.269291	0.226627	N	-0.71902	4.76e-05	D	NNND
Uchl4	176.004	-0.39287	0.17464	N	-0.46373	0.0574504	N	-0.149327	0.653567	N	-0.618897	0.00588525	D	NNND
2700097O09Rik	176.051	0.166546	0.651055	N	0.238789	0.399604	N	-0.0153934	0.972652	N	-0.658075	0.00409587	D	NNND
B430212C06Rik	179.609	-0.492361	0.0155843	N	-0.365083	0.0637825	N	-0.48061	0.0108899	N	-1.5823	8.73e-21	D	NNND
Vmac	182.511	0.0467897	0.907796	N	-0.102186	0.715479	N	-0.229002	0.36341	N	-0.7083	0.000194989	D	NNND
Lsm1	182.566	-0.0773626	0.839117	N	-0.133168	0.631063	N	-0.398775	0.0822634	N	-0.806391	3.58e-05	D	NNND
Smoc2	183.419	0.0394413	0.927595	N	-0.0303295	0.926526	N	-0.375771	0.116662	N	-0.613925	0.00307296	D	NNND
Aldh3b2	183.478	-0.414208	0.172199	N	-0.0876981	0.799141	N	-0.492708	0.0563961	N	-1.37265	2.99e-10	D	NNND
Smim27	187.406	-0.1915	0.523825	N	-0.425439	0.0485873	N	-0.372566	0.100001	N	-0.823423	1.41e-05	D	NNND
Gm9001	187.597	-0.433324	0.0587789	N	-0.282629	0.205898	N	-0.360559	0.0972913	N	-1.02351	1.04e-08	D	NNND
Uvssa	188.311	0.00748501	0.98296	N	-0.407336	0.0255158	N	-0.342143	0.0776546	N	-0.78751	1.32e-06	D	NNND
Stk17b	192.166	-0.527304	0.0446863	N	-0.157407	0.600862	N	-0.335064	0.207427	N	-0.709364	0.00115165	D	NNND
Nmb	192.83	0.128536	0.852616	N	0.500656	0.238653	N	-0.0112449	0.987746	N	-1.01319	0.00510643	D	NNND
Taf13	195.122	-0.235665	0.558565	N	-0.304161	0.345429	N	-0.204157	0.586061	N	-0.885404	0.000505695	D	NNND
Meg3	198.405	0.113686	0.701391	N	-0.0648254	0.807463	N	-0.441918	0.0218355	N	-0.831598	1.03e-06	D	NNND
Gcc2	200.017	-0.290119	0.0800505	N	-0.351742	0.0131786	N	-0.483383	0.000467633	N	-0.734611	1.01e-08	D	NNND
Gm10851	201.709	0.464057	0.0517127	N	0.210979	0.409225	N	-0.306711	0.214517	N	-1.28017	3e-11	D	NNND
Sec22a	201.8	-0.418164	0.0257725	N	-0.374446	0.0309117	N	-0.131726	0.571675	N	-0.705825	5.12e-06	D	NNND
Ptrh2	203.346	-0.505133	0.0917792	N	-0.45377	0.0946572	N	-0.000185452	0.999597	N	-0.610634	0.014081	D	NNND
Cnot6	207.921	-0.45625	0.0181971	N	-0.385933	0.0337128	N	-0.421913	0.0200053	N	-0.658396	5.31e-05	D	NNND
Ctso	208.137	-0.106785	0.838609	N	-0.205041	0.584183	N	-0.480282	0.134373	N	-0.63456	0.0282551	D	NNND
Bmp6	209.481	-0.0853576	0.825861	N	-0.3729	0.110818	N	-0.422914	0.0681271	N	-1.0012	2.96e-07	D	NNND
Plpp5	209.8	-0.217631	0.517825	N	-0.316246	0.229295	N	-0.564886	0.0160382	N	-0.689239	0.00166236	D	NNND
Msantd3	212.994	-0.136295	0.794948	N	-0.274091	0.461754	N	-0.0994145	0.840378	N	-0.767383	0.00875884	D	NNND
Plscr4	214.265	-0.323587	0.322028	N	-0.542201	0.0319008	N	-0.176885	0.604687	N	-0.933715	3.38e-05	D	NNND
Pank2	221.542	-0.225747	0.216959	N	-0.533276	9.43e-05	N	-0.367475	0.0128698	N	-0.698219	9.86e-08	D	NNND
Morf4l2	222.884	0.0354278	0.894206	N	-0.258276	0.0765093	N	-0.51757	9.64e-05	N	-0.66556	1.02e-07	D	NNND
Fmo5	224.652	-0.346541	0.185288	N	-0.393162	0.0765093	N	-0.555658	0.00759767	N	-0.85205	7.64e-06	D	NNND
Socs6	227.974	-0.447314	0.0386418	N	-0.322523	0.120792	N	-0.172559	0.493424	N	-0.655159	0.0002369	D	NNND
Ubxn8	232.163	-0.176982	0.491454	N	-0.142813	0.526983	N	-0.145499	0.549873	N	-0.652493	8.18e-05	D	NNND
1600012H06Rik	234.389	-0.325307	0.0917792	N	-0.470613	0.00319448	N	-0.384167	0.0224754	N	-0.761449	2.45e-07	D	NNND
Tmem106c	242.842	-0.164345	0.409242	N	-0.197256	0.228913	N	-0.471747	0.000822421	N	-0.748012	9.1e-09	D	NNND
Dpy19l4	247.243	-0.497602	0.00536237	N	-0.588662	0.000263055	N	-0.495764	0.00293792	N	-0.695344	6.93e-06	D	NNND
Ube2d2a	254.762	-0.209213	0.412367	N	-0.212745	0.326375	N	-0.107247	0.690979	N	-0.612101	0.000379522	D	NNND
Tm2d1	259.436	-0.447155	0.151916	N	-0.469858	0.0815772	N	-0.272817	0.385466	N	-0.791522	0.000861551	D	NNND
Ergic2	267.946	-0.0926612	0.68546	N	-0.213457	0.184728	N	-0.304978	0.0468176	N	-0.608605	3.88e-06	D	NNND
Slc26a2	269.047	-0.0265955	0.944546	N	-0.344335	0.0745294	N	-0.567326	0.00129776	N	-0.702928	2.48e-05	D	NNND
Zfp518a	269.263	-0.357031	0.138218	N	-0.40392	0.0502351	N	-0.302238	0.176669	N	-0.809609	6.33e-06	D	NNND
Vcpip1	269.502	-0.110534	0.668227	N	-0.229932	0.213571	N	-0.388419	0.0210414	N	-0.619896	3.87e-05	D	NNND
Pde1a	274.072	-0.178831	0.588284	N	-0.410642	0.0775104	N	-0.224265	0.417583	N	-1.17524	1.44e-09	D	NNND
1700096K18Rik	274.63	-0.450462	0.0513037	N	-0.325726	0.14095	N	-0.262022	0.273066	N	-1.1816	3.56e-11	D	NNND
Agmo	274.984	-0.302534	0.380556	N	-0.302416	0.305777	N	-0.214922	0.523377	N	-0.771252	0.00115958	D	NNND
Fkbp7	276.019	-0.13967	0.565447	N	-0.28283	0.109694	N	-0.143267	0.511539	N	-0.751506	3.72e-07	D	NNND
Amy1	277.09	-0.26455	0.369048	N	0.0149476	0.965491	N	-0.261849	0.318847	N	-0.735541	0.000263463	D	NNND
Lyrm2	277.165	-0.308441	0.331533	N	-0.422946	0.097639	N	-0.231632	0.445713	N	-0.640153	0.00504045	D	NNND
Crem	283.733	-0.382013	0.154899	N	-0.244345	0.343701	N	-0.491781	0.0279961	N	-1.23039	1.6e-10	D	NNND
Usp22	285.753	-0.360721	0.0642011	N	-0.451448	0.00659202	N	-0.266337	0.160388	N	-0.662018	1.63e-05	D	NNND
Sgce	286.605	-0.25188	0.136925	N	-0.440828	0.00101067	N	-0.521223	8.35e-05	N	-0.682944	4.77e-08	D	NNND
Ppm1m	287.932	-0.256529	0.243974	N	-0.0486985	0.845131	N	-0.255017	0.194148	N	-0.690137	1.04e-05	D	NNND
Gskip	293.636	-0.219449	0.273134	N	-0.426028	0.00499359	N	-0.482742	0.00127619	N	-0.642392	4.64e-06	D	NNND
Coq3	299.727	-0.146144	0.630749	N	-0.108788	0.682154	N	0.114443	0.687293	N	-0.613236	0.000886809	D	NNND
Scamp1	300.28	-0.206597	0.275462	N	-0.406233	0.00457131	N	-0.522039	0.000175173	N	-0.681443	2.09e-07	D	NNND
Gm32817	308.393	-0.0385788	0.90393	N	0.0365061	0.878996	N	-0.189225	0.332838	N	-0.653307	7.63e-06	D	NNND
Gramd1b	311.142	-0.226127	0.833199	N	-0.564695	0.437147	N	-1.01512	0.115808	N	-1.32249	0.0241974	D	NNND
Gm16439	312.473	0.340511	0.270392	N	0.214863	0.467027	N	-0.244405	0.420339	N	-1.20147	1.87e-08	D	NNND
Ift52	318.157	-0.2409	0.208867	N	-0.35922	0.0192437	N	-0.41577	0.00576049	N	-0.753337	2.67e-08	D	NNND
Mfsd14b	319.372	-0.31515	0.148253	N	-0.404395	0.025775	N	-0.522293	0.00253208	N	-0.629608	0.000117713	D	NNND
Ccdc90b	321.477	-0.0691795	0.814037	N	-0.256123	0.160963	N	-0.354466	0.0408057	N	-0.911484	5.17e-10	D	NNND
Rasa1	322.914	-0.472137	0.0357472	N	-0.582791	0.00270161	N	-0.540936	0.00600392	N	-0.652548	0.000445553	D	NNND
Cdc123	328.797	-0.0822377	0.746091	N	-0.347955	0.0271572	N	-0.392924	0.011333	N	-0.684595	8.22e-07	D	NNND
C330007P06Rik	331.677	-0.287033	0.134768	N	-0.239497	0.171482	N	-0.16209	0.418953	N	-0.80718	9.69e-09	D	NNND
Snx5	333.373	-0.103245	0.558251	N	-0.358367	0.00199873	N	-0.532652	1.85e-06	N	-0.726803	8.43e-12	D	NNND
Tbc1d23	334.596	-0.240344	0.341169	N	-0.223139	0.3117	N	-0.371338	0.064176	N	-0.605498	0.000576809	D	NNND
Tst	340.366	-0.0526024	0.908501	N	-0.100548	0.752093	N	-0.308767	0.245889	N	-1.16362	8.48e-09	D	NNND
Parp1	343.018	-0.236914	0.168218	N	-0.45409	0.00061676	N	-0.386153	0.00499339	N	-0.636295	3.32e-07	D	NNND
Copb2	350.571	-0.235711	0.291682	N	-0.358083	0.04335	N	-0.37539	0.0339848	N	-0.611176	9.82e-05	D	NNND
Bcap29	352.724	-0.37366	0.118461	N	-0.454788	0.0248805	N	-0.0312611	0.931991	N	-0.632786	0.000650238	D	NNND
Scoc	357.062	-0.292897	0.38583	N	-0.472832	0.0704755	N	-0.329628	0.253719	N	-0.677997	0.00407064	D	NNND
Arel1	361.637	-0.111005	0.803868	N	-0.237477	0.446662	N	-0.475089	0.0803218	N	-0.790668	0.000838226	D	NNND
Cast	364.663	-0.52624	0.0302654	N	-0.512377	0.0198785	N	-0.344523	0.156899	N	-0.657284	0.00129535	D	NNND
3830406C13Rik	378.662	-0.29214	0.329331	N	-0.598662	0.00686047	N	-0.407029	0.0933177	N	-0.658494	0.00185219	D	NNND
Slc16a7	380.192	-0.527996	0.397025	N	-0.662093	0.192854	N	-0.901547	0.0581437	N	-1.69803	3.57e-05	D	NNND
Pon1	386.681	0.504045	0.572817	N	0.152194	0.863696	N	-0.520189	0.509383	N	-1.45472	0.0127201	D	NNND
Dleu2	387.777	-0.344915	0.256006	N	0.0311253	0.931405	N	-0.235574	0.428705	N	-0.8618	5.89e-05	D	NNND
Lyplal1	390.519	-0.374916	0.0560517	N	-0.226963	0.244709	N	-0.166409	0.446599	N	-0.68768	8.69e-06	D	NNND
Rheb	397.4	-0.139778	0.569451	N	-0.270595	0.133735	N	-0.185097	0.362686	N	-0.652529	1.37e-05	D	NNND
Rap2c	399.048	-0.342168	0.119843	N	-0.536406	0.00244153	N	-0.587564	0.000743218	N	-0.626375	0.000195321	D	NNND
H3f3b	413.736	-0.185522	0.359282	N	-0.322139	0.0372017	N	-0.520985	0.000240438	N	-0.715498	8.01e-08	D	NNND
Gm13131	425.356	-0.932886	0.0618084	N	-0.827848	0.0693622	N	-0.578444	0.248324	N	-1.38856	0.000507209	D	NNND
Osbpl11	440.807	-0.121719	0.739684	N	-0.216757	0.423865	N	-0.370787	0.13015	N	-0.699616	0.000717476	D	NNND
Skap2	444.082	-0.150469	0.570352	N	-0.260869	0.19002	N	-0.118284	0.640021	N	-0.612984	0.000184546	D	NNND
Aox1	456.308	-0.489297	0.0433687	N	-0.561621	0.00788219	N	-0.532253	0.0125157	N	-0.772939	7.36e-05	D	NNND
Rnf141	474.469	-0.243771	0.223634	N	-0.52448	0.000450706	N	-0.453801	0.00301611	N	-0.611208	1.87e-05	D	NNND
Fcor	484.128	-0.0339869	0.929715	N	-0.353215	0.0811405	N	-0.372715	0.0650823	N	-0.681674	9.1e-05	D	NNND
Pus10	484.446	-0.331071	0.0108162	N	-0.34066	0.00394932	N	-0.331198	0.00569605	N	-0.700129	4.62e-11	D	NNND
Anxa4	488.394	-0.13595	0.436822	N	-0.364519	0.00259091	N	-0.597207	1.38e-07	N	-0.963582	5.76e-19	D	NNND
Txlng	489.039	-0.145415	0.547655	N	-0.547348	0.000435628	N	-0.591185	0.000112313	N	-0.857357	2.62e-09	D	NNND
Ddx3y	494.34	-0.482172	0.0327709	N	-0.502711	0.0126239	N	-0.482155	0.0176029	N	-0.682689	0.0002369	D	NNND
Nr4a2	513.206	-0.232397	0.849356	N	-1.27762	0.0668173	N	-1.1796	0.0978781	N	-1.89645	0.00234067	D	NNND
Smad2	527.257	-0.571808	6.36e-07	N	-0.469294	3.96e-05	N	-0.443962	0.000118929	N	-0.612448	1.68e-08	D	NNND
Tmem167	529.91	-0.180814	0.423509	N	-0.323436	0.0569722	N	-0.215088	0.25783	N	-0.616803	2.82e-05	D	NNND
Fam45a	555.682	-0.316857	0.0736534	N	-0.522788	0.00026713	N	-0.457908	0.00173343	N	-0.757709	1.49e-08	D	NNND
Impa1	561.712	-0.145882	0.420262	N	-0.290595	0.0288533	N	-0.47931	8.2e-05	N	-0.975713	4.11e-18	D	NNND
Dpyd	566.944	-0.1959	0.444794	N	-0.195362	0.36911	N	-0.00136246	0.997493	N	-0.715705	1.37e-05	D	NNND
Adh1	572.734	-0.205227	0.610876	N	-0.287062	0.360227	N	-0.322717	0.304923	N	-0.605998	0.0196496	D	NNND
Tbca	589.063	-0.337812	0.322672	N	-0.504316	0.0616916	N	-0.115067	0.773238	N	-0.629424	0.0116147	D	NNND
Tmed10	589.936	-0.355901	0.151916	N	-0.263995	0.253743	N	-0.280144	0.229045	N	-0.802161	1.02e-05	D	NNND
Chdh	593.579	0.240509	0.345013	N	0.349996	0.0817451	N	0.0144235	0.96789	N	-0.93513	2.79e-08	D	NNND
Cd99l2	598.899	0.0354594	0.881555	N	-0.0416436	0.816536	N	-0.0856787	0.627895	N	-0.631933	9.64e-09	D	NNND
Lncbate1	605.171	0.150525	0.656645	N	-0.354237	0.130332	N	-0.43202	0.0552415	N	-1.04459	3.23e-08	D	NNND
Pnp	611.665	0.130545	0.607175	N	-0.213772	0.266955	N	0.0913638	0.71133	N	-0.746346	5.33e-07	D	NNND
Atxn10	617.431	-0.335817	0.0746061	N	-0.205584	0.269195	N	-0.269212	0.131334	N	-0.610207	3.1e-05	D	NNND
Acbd5	625.38	-0.353615	0.0702027	N	-0.450566	0.00641481	N	-0.210032	0.293131	N	-0.925354	2.62e-10	D	NNND
Rasd1	633.276	0.721942	0.39565	N	-0.323856	0.70414	N	-0.697305	0.355877	N	-1.58157	0.00805374	D	NNND
Adam9	645.818	-0.332344	0.0723721	N	-0.425337	0.00653469	N	-0.237237	0.186881	N	-0.749672	9.03e-08	D	NNND
Bnip3	647.591	0.293408	0.508413	N	-0.0284686	0.953068	N	-0.34321	0.359099	N	-1.09375	8.77e-05	D	NNND
Dpy30	650.456	-0.370266	0.161158	N	-0.503823	0.0195288	N	-0.346925	0.142932	N	-0.674564	0.000670459	D	NNND
Chmp1b	656.477	-0.165635	0.442194	N	-0.392049	0.00986369	N	-0.473861	0.00120443	N	-0.823466	7.48e-10	D	NNND
Igf1	657.369	-0.735349	0.209451	N	-0.713968	0.162069	N	-0.938457	0.0512033	N	-1.30553	0.00278023	D	NNND
Arpc5	661.943	-0.115266	0.530788	N	-0.230539	0.0847985	N	-0.244458	0.0683007	N	-0.683877	5.17e-10	D	NNND
Tomm7	668.358	-0.32822	0.154899	N	-0.33076	0.100274	N	-0.237443	0.284175	N	-0.628298	0.000268305	D	NNND
Fnta	699.304	-0.24194	0.0790484	N	-0.447139	4.25e-05	N	-0.488081	5.91e-06	N	-0.66874	7.01e-11	D	NNND
Dhrs4	708.198	-0.148146	0.594415	N	-0.0823728	0.748195	N	-0.103654	0.700933	N	-0.611979	0.000302619	D	NNND
Lclat1	712.773	0.129168	0.683264	N	0.104951	0.700128	N	0.282792	0.211569	N	-0.641165	0.000517235	D	NNND
Hprt	720.173	-0.408761	0.143925	N	-0.510402	0.0288533	N	-0.334271	0.19682	N	-0.671557	0.0017571	D	NNND
Ssr1	725.884	-0.192352	0.214141	N	-0.208233	0.115429	N	-0.254962	0.0467442	N	-0.630535	4.46e-09	D	NNND
Hnrnpk	726.835	-0.34599	0.0116323	N	-0.419522	0.00052799	N	-0.298351	0.0212238	N	-0.62685	2.37e-08	D	NNND
Sult1a1	732.328	-0.279551	0.383028	N	-0.373148	0.148136	N	-0.380884	0.142877	N	-1.34263	3.89e-11	D	NNND
Psme2b	733.44	-0.05101	0.870793	N	0.0928671	0.681366	N	-0.0685069	0.795037	N	-0.747896	4.77e-07	D	NNND
Maob	738.614	-0.0411974	0.856895	N	-0.0409275	0.818876	N	-0.0920101	0.591073	N	-0.623231	1.03e-08	D	NNND
Mettl9	747.698	-0.402252	0.0297957	N	-0.41619	0.0119132	N	-0.33583	0.0538417	N	-0.880824	1.19e-09	D	NNND
Gas1	763.424	-0.291142	0.504	N	-0.549698	0.0854492	N	0.0698903	0.891659	N	-0.734431	0.0116684	D	NNND
Ermp1	785.512	-0.311205	0.202757	N	-0.188584	0.424626	N	-0.170847	0.500635	N	-0.92796	4.64e-08	D	NNND
Rexo2	796.17	-0.338123	0.219126	N	-0.346408	0.144542	N	0.000466262	0.999027	N	-0.632377	0.00187834	D	NNND
Sft2d2	804.275	-0.117203	0.694649	N	-0.143914	0.543909	N	-0.294705	0.155659	N	-0.745443	8.22e-06	D	NNND
Gm4076	812.317	-0.19465	0.542064	N	-0.233786	0.365176	N	0.0909444	0.788568	N	-0.625951	0.00212774	D	NNND
Flcn	816.29	0.156189	0.594138	N	0.218289	0.339721	N	-0.339437	0.10804	N	-0.772374	9.55e-06	D	NNND
Dgat1	848.198	0.000326873	0.999323	N	-0.108253	0.694623	N	-0.288375	0.211035	N	-1.09511	4.24e-10	D	NNND
Clk1	864.846	-0.0643401	0.839005	N	-0.461264	0.007247	N	-0.322338	0.0845485	N	-0.655658	3.21e-05	D	NNND
Vcl	878.615	-0.228356	0.237102	N	-0.250795	0.12556	N	-0.581439	2.58e-05	N	-0.63075	2.74e-06	D	NNND
Ypel5	888.105	-0.471093	0.0103291	N	-0.516556	0.00174533	N	-0.254654	0.188926	N	-0.630329	5.04e-05	D	NNND
Pex3	892.855	-0.123929	0.52669	N	-0.124998	0.448589	N	-0.256066	0.0730949	N	-0.843375	2.77e-13	D	NNND
Adam12	929.52	-0.0284218	0.981067	N	-0.145341	0.864178	N	-0.600889	0.399131	N	-1.74359	0.00109249	D	NNND
Gm7908	934.026	-0.310766	0.316418	N	-0.0541718	0.877477	N	0.0743305	0.844951	N	-0.807955	0.000150306	D	NNND
Cpd	937.211	-0.248406	0.0906908	N	-0.356252	0.00317023	N	-0.481522	2.5e-05	N	-0.86108	6.16e-16	D	NNND
Scpep1	996.672	-0.0419324	0.901882	N	0.0244728	0.924481	N	-0.260868	0.16997	N	-0.618574	5.88e-05	D	NNND
Ncoa1	1030.04	-0.329801	0.0120265	N	-0.451191	7.14e-05	N	-0.537851	1e-06	N	-0.717892	1.01e-11	D	NNND
Lpcat3	1051.77	-0.268345	0.219569	N	-0.489413	0.00339859	N	-0.589617	0.000233854	N	-1.0331	2.82e-12	D	NNND
Retn	1056.24	-0.512426	0.106964	N	0.0363647	0.929234	N	-0.472719	0.0999769	N	-0.687852	0.00710359	D	NNND
Syap1	1088.07	-0.263754	0.207811	N	-0.248033	0.177922	N	-0.0378182	0.894399	N	-0.674588	5.26e-06	D	NNND
Enpp5	1091.27	-0.275073	0.0489071	N	-0.166686	0.232541	N	-0.486362	1.45e-05	N	-0.783195	1.05e-13	D	NNND
Isoc1	1097.24	-0.242203	0.364645	N	-0.339892	0.110211	N	-0.536541	0.0051207	N	-1.08907	1.76e-10	D	NNND
2007-09-01	1148.98	-0.366454	0.112279	N	-0.584972	0.0015747	N	-0.490803	0.00971061	N	-0.666681	0.000148312	D	NNND
Plpp6	1205.4	-0.405155	0.00927259	N	-0.269918	0.0822709	N	-0.300364	0.0486329	N	-0.703183	4.05e-08	D	NNND
Pdk1	1229.76	-0.320913	0.290972	N	-0.586842	0.0107541	N	-0.519743	0.0271742	N	-1.18999	3.43e-09	D	NNND
Gys2	1231.94	-0.075269	0.844245	N	0.0793512	0.788611	N	-0.180375	0.51429	N	-1.04624	9.97e-09	D	NNND
Scp2	1274.33	-0.221286	0.288977	N	-0.0797102	0.717982	N	-0.293138	0.0858572	N	-0.776828	2.46e-08	D	NNND
Snapin	1311.5	-0.210398	0.432031	N	-0.220912	0.325082	N	-0.25531	0.249098	N	-0.846516	5e-07	D	NNND
Zwint	1317.25	-0.185042	0.493088	N	-0.142995	0.549264	N	-0.206281	0.366609	N	-0.962111	3.18e-09	D	NNND
Ptprd	1341.67	-0.304346	0.0294908	N	-0.471486	5.22e-05	N	-0.142913	0.350855	N	-0.60356	4.28e-08	D	NNND
Dnajb9	1349.24	-0.384246	0.104105	N	-0.383215	0.0666623	N	-0.534613	0.00559274	N	-1.41553	3.97e-17	D	NNND
Vps35	1395.24	-0.346996	0.111272	N	-0.318571	0.103656	N	-0.1521	0.530882	N	-0.653914	7.51e-05	D	NNND
Sorbs1	1396.69	-0.232709	0.310212	N	-0.483442	0.00423637	N	-0.344472	0.0581896	N	-0.73129	2.04e-06	D	NNND
Pex13	1412.61	-0.291921	0.0631284	N	-0.466616	0.000258511	N	-0.537117	1.36e-05	N	-0.871527	5.8e-14	D	NNND
Stt3b	1457.73	-0.217592	0.0559337	N	-0.321213	0.00065924	N	-0.458273	2.45e-07	N	-0.626919	1.78e-13	D	NNND
Psma6	1464.79	-0.278939	0.114353	N	-0.0840867	0.672422	N	-0.070991	0.752025	N	-0.626183	1.69e-06	D	NNND
Ehhadh	1550.22	-0.292605	0.785794	N	-0.852582	0.22856	N	-1.00635	0.143063	N	-1.25567	0.0462246	D	NNND
Ppp1r15b	1570.88	-0.207444	0.543546	N	-0.405381	0.102874	N	-0.591077	0.00925	N	-0.808617	0.000119605	D	NNND
Dram2	1653.51	-0.246839	0.241563	N	-0.258558	0.152094	N	-0.136543	0.533166	N	-0.888989	3.66e-10	D	NNND
Sdcbp	1678.58	-0.169337	0.358655	N	-0.220183	0.139382	N	-0.126645	0.471308	N	-0.660394	2.92e-08	D	NNND
Bscl2	1741.6	0.143765	0.599539	N	0.157526	0.482479	N	-0.338685	0.0773139	N	-0.715015	9.23e-06	D	NNND
Bche	1750.44	-0.447017	0.113392	N	-0.293267	0.282697	N	-0.548324	0.0204192	N	-1.16988	1.12e-08	D	NNND
Crls1	1795.87	-0.125589	0.501464	N	-0.49739	2.84e-05	N	-0.270852	0.0423347	N	-0.763141	5.31e-12	D	NNND
Acad11	1878.92	-0.33111	0.12736	N	-0.184358	0.397067	N	0.143835	0.551782	N	-0.85304	5.79e-08	D	NNND
Atl3	2155.47	-0.478844	0.0089664	N	-0.575385	0.000399706	N	-0.534766	0.000995354	N	-0.782862	2.23e-07	D	NNND
Clic4	2211.77	-0.06664	0.815733	N	-0.170038	0.376826	N	-0.567995	0.000121853	N	-0.663571	3.24e-06	D	NNND
Car5b	2655.08	-0.468466	0.0311643	N	-0.43968	0.0266856	N	-0.558657	0.00274598	N	-1.17088	2.03e-12	D	NNND
Cav2	2663.51	-0.414212	0.0361261	N	-0.352452	0.0555927	N	-0.528873	0.00155099	N	-0.769197	7.33e-07	D	NNND
Neat1	2741.17	-0.353023	0.567791	N	-0.202291	0.725258	N	0.211365	0.733997	N	-1.40297	0.000202682	D	NNND
Celf2	2761.48	-0.157476	0.477925	N	-0.266672	0.109694	N	-0.522956	0.000275667	N	-1.02374	5.92e-15	D	NNND
1110032A03Rik	3018.31	-0.275696	0.269535	N	-0.327528	0.115016	N	-0.0702709	0.819834	N	-0.760722	9.52e-06	D	NNND
Elovl3	3026.87	-0.99573	0.257395	N	-0.793431	0.320497	N	-1.19888	0.102161	N	-2.25489	0.00029129	D	NNND
Rtn4	3637.07	-0.408027	0.0692577	N	-0.434517	0.0271105	N	-0.404317	0.0424789	N	-1.01883	9.86e-10	D	NNND
Hacd2	3652.7	-0.210556	0.531834	N	0.053887	0.876019	N	0.300216	0.260061	N	-0.874765	2.12e-05	D	NNND
Ephx2	4039.13	-0.337063	0.263327	N	0.0442384	0.900008	N	-0.0462943	0.909198	N	-0.842811	6.02e-05	D	NNND
Tmed5	5183.74	-0.394285	0.188322	N	-0.282369	0.313727	N	0.0513623	0.90146	N	-1.17536	1.5e-08	D	NNND
Slc25a1	5556.41	0.0851988	0.8168	N	-0.347739	0.118518	N	-0.449269	0.0320801	N	-1.20031	8.85e-12	D	NNND
Aplp2	6039.36	-0.0532726	0.900579	N	-0.0593222	0.848562	N	-0.294787	0.227883	N	-0.725736	0.000184933	D	NNND
Nedd4	6109.71	-0.0729777	0.668226	N	-0.309033	0.00292123	N	-0.374418	0.000158818	N	-0.967023	1.86e-27	D	NNND
Acox1	6436.41	-0.188113	0.468195	N	-0.2029	0.346301	N	-0.279799	0.1671	N	-1.04104	2.21e-11	D	NNND
Gstz1	7905.68	-0.17958	0.444882	N	-0.168643	0.40513	N	-0.289517	0.10902	N	-0.964605	1.31e-11	D	NNND
Fam213a	8190.3	-0.460047	0.063813	N	-0.535869	0.0120085	N	-0.313437	0.195376	N	-0.970907	2.42e-07	D	NNND
Itm2b	9864.47	-0.282798	0.209979	N	-0.229255	0.26372	N	-0.398025	0.0273027	N	-0.727509	4.25e-06	D	NNND
Mgst1	11914.9	-0.229019	0.154285	N	-0.156073	0.306447	N	-0.50174	2.19e-05	N	-1.35453	1.57e-36	D	NNND
Cd36	17102.5	-0.358598	0.030032	N	-0.336445	0.0258538	N	-0.424718	0.00275026	N	-1.03319	1.34e-16	D	NNND
Hsp90ab1	4770.09	0.569329	0.0449907	N	0.407582	0.136921	N	0.389919	0.162251	N	1.05755	1.81e-06	U	NNNU	YES	4	-18476	-16669	-15314	-11410
Nradd	31.2917	0.157499	0.832358	N	0.612964	0.16236	N	0.811312	0.0531806	N	1.83323	2.37e-08	U	NNNU	YES	4	-19558	-340	1585	14907
Pnpla3	1666.34	0.638754	0.09464	N	0.398257	0.289032	N	0.650514	0.0535092	N	1.09736	0.000194305	U	NNNU	YES	4	-28057	-26729	-22864	-11455
Fah	422.704	0.0658287	0.914403	N	0.173434	0.668975	N	0.0334681	0.951909	N	0.966088	0.00045103	U	NNNU	YES	4	-293	1377	9129	10226
Atp5d	3564.31	0.22925	0.252793	N	0.330669	0.0390421	N	0.372343	0.0162034	N	0.752593	2.43e-08	U	NNNU	YES	3	1217	4434	5748
Hspb1	249.082	0.789267	0.199324	N	0.443494	0.463369	N	0.0374387	0.967497	N	1.58521	0.000380398	U	NNNU	YES	3	21659	26492	28888
Vegfa	2207.68	0.583972	0.000790326	N	0.489321	0.00379763	N	0.528806	0.00130608	N	1.04868	1.24e-12	U	NNNU	YES	3	21747	23093	26832
Ergic1	1160.27	0.0700782	0.841192	N	0.22643	0.313862	N	0.062033	0.843388	N	0.807387	1.77e-06	U	NNNU	YES	3	276	10102	21061
Ccnd1	45.6391	0.46734	0.390126	N	0.455264	0.332554	N	-0.0223916	0.976778	N	0.82704	0.036779	U	NNNU	YES	3	6307	10242	11986
Itpk1	936.446	0.505306	0.0106325	N	-0.0957157	0.709068	N	-0.184192	0.435047	N	0.635878	0.000153272	U	NNNU	YES	3	9466	22820	25895
Acacb	4157.11	0.0478485	0.912531	N	0.0869804	0.774281	N	0.43927	0.0492285	N	0.705468	0.000347971	U	NNNU	YES	3	-14759	-3045	-198
Eif4g3	478.097	0.0468868	0.883103	N	0.366958	0.0289184	N	0.250233	0.181065	N	1.14898	4.58e-17	U	NNNU	YES	3	-19890	-15661	-11430
Tet3	229.863	0.500429	0.045855	N	0.291685	0.25243	N	0.488796	0.0318898	N	0.69406	0.000675439	U	NNNU	YES	3	-26152	-17071	21062
Fosl2	436.457	0.238714	0.81189	N	-0.400313	0.584672	N	0.150563	0.873486	N	1.16724	0.0385819	U	NNNU	YES	3	-28955	-14752	19626
Thrsp	38400.4	-0.133098	0.769443	N	-0.068154	0.863118	N	0.316897	0.321953	N	0.681295	0.00778121	U	NNNU	YES	3	-6067	-3074	-1260
Htra3	332.993	0.402428	0.0277576	N	0.28041	0.117999	N	-0.176855	0.408217	N	0.780433	4.69e-08	U	NNNU	YES	3	-6710	5258	25760
Tnip1	175.007	0.27795	0.200622	N	0.103502	0.656717	N	0.059908	0.838079	N	0.701089	3.37e-06	U	NNNU	YES	2	10060	25810
Tpra1	85.2783	0.493817	0.205882	N	0.348932	0.342444	N	-0.0187742	0.975524	N	0.664724	0.0306028	U	NNNU	YES	2	10809	12738
Fgfrl1	435.554	0.0043507	0.992797	N	0.298283	0.284852	N	-0.121414	0.740489	N	0.798376	0.000265615	U	NNNU	YES	2	14643	29759
Mul1	273.027	0.472391	0.00986308	N	0.545472	0.00081515	N	0.584381	0.000283446	N	0.669414	1.27e-05	U	NNNU	YES	2	386	19417
Phlda3	1526.59	0.0916098	0.844223	N	0.185542	0.57225	N	0.434379	0.116467	N	0.963718	2.32e-05	U	NNNU	YES	2	4241	11221
Glrx5	759.553	0.159611	0.344437	N	0.456832	8.05e-05	N	0.575611	2.03e-07	N	0.632219	4.56e-09	U	NNNU	YES	2	4994	7082
Thop1	26.5456	0.0848962	0.904701	N	0.303703	0.487487	N	-0.146451	0.808592	N	0.686859	0.0484776	U	NNNU	YES	2	5865	12326
Mturn	175.108	0.0694065	0.892457	N	-0.347575	0.25183	N	-0.0448994	0.925101	N	0.838297	0.0004134	U	NNNU	YES	2	8012	10232
Bcl6	1141.18	1.01614	0.0658357	N	0.606761	0.269609	N	0.58418	0.302573	N	1.19038	0.00951495	U	NNNU	YES	2	9282	24507
Eno1	2102	0.225359	0.226586	N	0.263676	0.091039	N	0.44017	0.00146782	N	0.681023	8.66e-08	U	NNNU	YES	2	-15713	-5757
P2rx5	104.031	-0.26246	0.586382	N	0.30395	0.429786	N	0.332761	0.399118	N	0.958738	0.000865089	U	NNNU	YES	2	-15853	7787
Stat6	358.413	0.425835	0.0218301	N	0.338332	0.0571803	N	-0.0561915	0.843388	N	0.655192	1.51e-05	U	NNNU	YES	2	-21272	1208
Sh3bp5	204.107	-0.210743	0.508413	N	-0.16354	0.563127	N	0.0429713	0.911747	N	0.81254	2.48e-05	U	NNNU	YES	2	-27033	27244
Cdc42ep4	136.073	0.256162	0.443913	N	0.312878	0.249496	N	0.554313	0.0205837	N	0.822417	0.000107664	U	NNNU	YES	2	-27741	-8722
Efr3a	786.785	0.326359	0.0483219	N	0.579609	1.19e-05	N	0.558384	2.36e-05	N	0.621813	1.15e-06	U	NNNU	YES	2	-326	5047
Ifrd1	579.577	-0.213119	0.66706	N	0.298372	0.43535	N	0.482001	0.164947	N	0.84306	0.00424256	U	NNNU	YES	2	-509	20669
Plxna1	618.798	0.444281	0.193013	N	0.299725	0.35316	N	0.263014	0.447774	N	0.967635	7.77e-05	U	NNNU	YES	2	-546	12254
Pygl	4798.89	0.199055	0.484339	N	0.130087	0.616811	N	0.120248	0.672334	N	0.818986	2.89e-06	U	NNNU	YES	2	-6143	-4336
Smtnl2	41.5993	-0.958839	0.120331	N	-0.0455652	0.953799	N	0.0619849	0.946279	N	0.972166	0.0483796	U	NNNU	YES	2	-6633	5752
Notch4	90.7684	0.61062	0.0887906	N	0.352456	0.3305	N	0.552143	0.096857	N	1.12408	3.32e-05	U	NNNU	YES	2	-7643	-6563
Dysf	101.526	0.0323136	0.952842	N	0.123027	0.729239	N	0.338092	0.259074	N	0.757817	0.00111097	U	NNNU	YES	2	-8436	24313
Ogdh	15254	0.254495	0.258864	N	0.560293	0.000697022	N	0.551911	0.000725711	N	0.650275	3.28e-05	U	NNNU	YES	1	1064
Unc5b	21.0817	0.422486	0.540878	N	0.175855	0.795072	N	0.420736	0.509301	N	1.65501	3.54e-05	U	NNNU	YES	1	10722
Mpnd	109.792	0.0612323	0.855849	N	0.308902	0.107841	N	0.568811	0.000777717	N	0.630846	7.2e-05	U	NNNU	YES	1	127
Rusc2	148.687	0.291766	0.439383	N	0.309343	0.327663	N	0.200575	0.592138	N	0.702609	0.00570323	U	NNNU	YES	1	12757
Iffo2	51.9036	0.296368	0.468113	N	0.334988	0.319437	N	0.346445	0.328179	N	0.995283	7.51e-05	U	NNNU	YES	1	12985
Slc37a4	100.709	-0.271736	0.550885	N	0.032544	0.946068	N	0.148181	0.751826	N	0.626808	0.0381763	U	NNNU	YES	1	134
Dnmt3a	143.648	0.230752	0.539124	N	0.0361138	0.927395	N	0.55225	0.0348492	N	0.964617	1.86e-05	U	NNNU	YES	1	1385
Siah2	60.9234	-0.289696	0.68867	N	0.276936	0.638121	N	0.291393	0.647443	N	0.921148	0.0371238	U	NNNU	YES	1	140
Gpi1	2150.14	0.233932	0.502287	N	0.39874	0.12644	N	0.345842	0.204311	N	0.781051	0.00038749	U	NNNU	YES	1	14654
Lamc3	45.2643	-0.10821	0.890694	N	0.317464	0.524539	N	0.592235	0.18249	N	0.954956	0.0107089	U	NNNU	YES	1	15139
Asrgl1	57.0496	-0.18002	0.72308	N	0.0500534	0.91458	N	0.299068	0.453001	N	0.625845	0.0402942	U	NNNU	YES	1	15918
Txnrd2	63.9752	0.341024	0.280884	N	0.208122	0.499888	N	0.192169	0.580312	N	0.658256	0.00381923	U	NNNU	YES	1	1614
Agtrap	53.0564	0.233698	0.574534	N	-0.0495099	0.908094	N	-0.00638079	0.990935	N	0.741318	0.00423237	U	NNNU	YES	1	16260
Lgals9	215.242	0.55348	0.00237448	N	0.387739	0.0355318	N	0.486254	0.00586339	N	1.00591	2.62e-11	U	NNNU	YES	1	16317
Dhx16	66.9472	0.564421	0.091872	N	0.361483	0.275919	N	0.0820201	0.870509	N	0.614166	0.0306277	U	NNNU	YES	1	17078
Ndn	218.408	-0.0858473	0.829387	N	0.397657	0.0850732	N	0.581293	0.00602503	N	0.846959	1.06e-05	U	NNNU	YES	1	18325
Rai1	106.101	0.575808	0.0635747	N	0.331435	0.292527	N	0.463717	0.120346	N	0.665324	0.0105003	U	NNNU	YES	1	1837
Tmem218	93.7927	0.00922289	0.982587	N	0.169763	0.525816	N	0.340736	0.152749	N	0.632198	0.00100268	U	NNNU	YES	1	186
Prex1	21.4343	0.52607	0.334936	N	0.128248	0.835302	N	0.308077	0.604315	N	0.89722	0.0243063	U	NNNU	YES	1	1870
Bmp8b	12.871	2.85297	0.196142	N	1.03969	0.674348	N	2.6826	0.174624	N	5.63405	0.000374159	U	NNNU	YES	1	1884
Pank4	51.3227	-0.0698313	0.899102	N	0.25814	0.436038	N	0.214026	0.57458	N	0.659322	0.0100783	U	NNNU	YES	1	18864
Abcc1	268.328	-0.260437	0.487581	N	0.160658	0.638504	N	0.346826	0.248484	N	0.978679	2.03e-05	U	NNNU	YES	1	19799
Aldh1a1	58.2845	-0.641404	0.142025	N	0.444442	0.255305	N	0.14667	0.790026	N	0.809311	0.0138895	U	NNNU	YES	1	20904
Fbxo32	104.718	0.203872	0.763838	N	0.236495	0.66056	N	-0.0152196	0.984353	N	0.881371	0.0254405	U	NNNU	YES	1	21970
Taok2	114.911	0.407039	0.256179	N	0.482549	0.105977	N	0.465134	0.131308	N	0.657468	0.0148571	U	NNNU	YES	1	22639
Farp1	108.947	-0.121104	0.853013	N	0.0784825	0.882323	N	0.172669	0.748784	N	0.976845	0.00276417	U	NNNU	YES	1	23985
Fam49a	401.688	-0.0492337	0.902135	N	-0.345892	0.110211	N	0.124786	0.663144	N	0.896284	2.05e-07	U	NNNU	YES	1	25135
Cep85	56.7038	0.529145	0.0742876	N	0.313044	0.299755	N	0.374933	0.217173	N	0.653582	0.00761688	U	NNNU	YES	1	26302
Zswim4	54.3206	0.465129	0.324148	N	0.398677	0.344594	N	0.214856	0.684533	N	0.796701	0.0218175	U	NNNU	YES	1	26549
As3mt	101.159	-0.20342	0.645602	N	0.0105876	0.982086	N	0.488682	0.105267	N	0.708524	0.00712426	U	NNNU	YES	1	273
Rhou	159.6	0.0476601	0.943073	N	-0.0586093	0.902913	N	0.547497	0.109991	N	1.26944	4.39e-06	U	NNNU	YES	1	27374
Chchd10	3471.86	0.401999	0.0459837	N	0.553688	0.00108799	N	0.277868	0.160144	N	0.657792	3.87e-05	U	NNNU	YES	1	2768
Rbm28	188.268	-0.00285556	0.99387	N	0.17567	0.453027	N	0.353839	0.0830439	N	0.830185	3.7e-07	U	NNNU	YES	1	28218
Axin2	126.37	0.339325	0.513949	N	0.0758003	0.887403	N	-0.0468517	0.943561	N	0.751718	0.0342016	U	NNNU	YES	1	28276
Gna12	454.303	0.240357	0.184392	N	0.495956	0.000235632	N	0.595616	4.64e-06	N	0.751195	1.22e-09	U	NNNU	YES	1	29730
Zc3h7b	185.998	0.123364	0.693983	N	0.122328	0.636703	N	0.446408	0.0240904	N	0.889498	9.92e-08	U	NNNU	YES	1	29946
G6pdx	3113	0.147055	0.541145	N	-0.00708717	0.978692	N	0.109633	0.634392	N	1.03237	6.81e-14	U	NNNU	YES	1	3225
Ptpn11	720.241	0.099866	0.713742	N	0.268354	0.144542	N	0.447768	0.00608256	N	0.844604	4.82e-09	U	NNNU	YES	1	356
6430571L13Rik	75.0588	-0.86739	0.166405	N	-0.610756	0.295619	N	0.821346	0.125371	N	1.76412	5.16e-05	U	NNNU	YES	1	3564
Stab1	58.8855	0.370976	0.436223	N	-0.0685548	0.89447	N	-0.289511	0.5461	N	0.695158	0.040691	U	NNNU	YES	1	3583
Selenow	338.703	0.248858	0.419568	N	0.480744	0.0333662	N	0.212432	0.456831	N	0.693445	0.000647766	U	NNNU	YES	1	3783
Arrb1	191.017	0.262299	0.316539	N	0.363025	0.0824487	N	0.353967	0.10136	N	1.18952	3.26e-13	U	NNNU	YES	1	4205
Elmo2	185.074	0.583862	0.0813511	N	0.557622	0.0632145	N	0.324195	0.359386	N	1.48271	1.09e-09	U	NNNU	YES	1	4813
Grk6	52.3096	0.125542	0.796905	N	0.145969	0.703781	N	0.525535	0.0763838	N	0.804892	0.00135751	U	NNNU	YES	1	5060
Slc4a2	81.6872	0.491685	0.0909661	N	0.519401	0.0416192	N	0.482237	0.0716752	N	0.911292	3.15e-05	U	NNNU	YES	1	513
Aven	53.0114	0.237933	0.505094	N	0.269972	0.356595	N	-0.187222	0.617366	N	0.676845	0.00292718	U	NNNU	YES	1	5168
Slc25a28	155.387	0.130269	0.690204	N	0.347321	0.111423	N	0.0305386	0.936381	N	0.803834	6.22e-06	U	NNNU	YES	1	5341
Mef2d	784.692	0.329242	0.273419	N	0.538076	0.0211202	N	0.460194	0.0572404	N	0.675121	0.00177164	U	NNNU	YES	1	6758
Fyco1	679.845	0.0940207	0.698671	N	0.288338	0.0684858	N	0.51149	0.000247042	N	0.956494	3.18e-14	U	NNNU	YES	1	6769
Lmf1	223.443	0.247348	0.274715	N	0.547961	0.00081515	N	0.546779	0.000908245	N	0.895462	1.22e-09	U	NNNU	YES	1	752
Cdpf1	62.7467	-0.0412409	0.932495	N	-0.587464	0.0202644	N	-0.391503	0.171409	N	0.623023	0.00455229	U	NNNU	YES	1	8164
Mrpl36	660.58	0.447224	0.00514295	N	0.418943	0.00509597	N	0.571895	4.42e-05	N	0.70132	1.5e-07	U	NNNU	YES	1	858
Map3k10	34.7702	0.459371	0.358141	N	0.236966	0.631749	N	0.363901	0.455109	N	0.77369	0.0348336	U	NNNU	YES	1	-105
Opa3	284.042	0.328102	0.0337739	N	0.254747	0.0850792	N	0.504809	8.41e-05	N	0.739293	3.08e-10	U	NNNU	YES	1	-1127
Hsph1	292.155	1.01203	0.213397	N	0.564063	0.481948	N	1.19035	0.0814001	N	1.56409	0.0117663	U	NNNU	YES	1	-11972
Als2cr12	40.6119	-0.0625452	0.921101	N	0.257286	0.504045	N	0.272028	0.513999	N	0.802715	0.00463988	U	NNNU	YES	1	-129
Polr3c	199.137	0.363763	0.0246258	N	0.543333	5.46e-05	N	0.494237	0.000399847	N	0.728459	6.82e-09	U	NNNU	YES	1	-152
Them6	29.0792	0.309711	0.618539	N	0.509961	0.270341	N	0.597616	0.195244	N	0.992735	0.00878967	U	NNNU	YES	1	-154
Cbr1	783.335	-0.0744693	0.902551	N	0.13034	0.758511	N	0.0987754	0.841345	N	1.15495	1.91e-05	U	NNNU	YES	1	-155
Samd1	32.2748	0.175762	0.787231	N	0.0828911	0.883984	N	0.354296	0.472433	N	0.897208	0.0110648	U	NNNU	YES	1	-19697
Adamts10	48.8968	0.326202	0.515846	N	0.315951	0.458731	N	0.515017	0.189229	N	0.733078	0.0306277	U	NNNU	YES	1	-20377
Map2k5	101.317	0.182061	0.617122	N	0.416648	0.0971934	N	0.314712	0.262942	N	0.903774	1.19e-05	U	NNNU	YES	1	-21277
Ddr1	13.3232	0.693688	0.284656	N	0.0818375	0.917411	N	0.433714	0.538991	N	1.22351	0.00874694	U	NNNU	YES	1	-21295
Gsap	11.8944	0.318046	0.719355	N	0.360973	0.615709	N	1.06517	0.0556861	N	1.07714	0.0408393	U	NNNU	YES	1	-224
Cyp2b10	507.557	0.410897	0.838222	N	0.960199	0.486467	N	0.954071	0.511231	N	2.66671	0.0127308	U	NNNU	YES	1	-2255
Tubb4b	506.529	-0.0577065	0.902537	N	0.543552	0.0208657	N	0.171767	0.595436	N	0.754559	0.000417056	U	NNNU	YES	1	-2464
Aatk	107.355	0.410768	0.091872	N	0.139852	0.612603	N	0.122431	0.699129	N	0.749992	4.87e-05	U	NNNU	YES	1	-25045
Uqcc2	125.395	0.119811	0.78124	N	0.216962	0.48837	N	0.520348	0.0453334	N	0.948619	1.62e-05	U	NNNU	YES	1	-27153
Acsl5	1400.11	-0.0718913	0.9157	N	-0.340929	0.40555	N	0.0975342	0.863192	N	0.93636	0.00320887	U	NNNU	YES	1	-3035
Luzp1	639.681	-0.133994	0.607175	N	0.544084	0.000672571	N	0.416801	0.0133109	N	1.16995	1.06e-16	U	NNNU	YES	1	-3327
Phkg1	31.4253	0.0228738	0.982401	N	0.445321	0.49142	N	-0.144355	0.872705	N	1.05	0.0411147	U	NNNU	YES	1	-4338
Capns1	1588.17	0.316895	0.0494149	N	0.456889	0.000663012	N	0.461086	0.000503782	N	0.787169	7.95e-11	U	NNNU	YES	1	-4468
Dhx35	97.285	0.376891	0.182676	N	0.532382	0.0187411	N	0.587541	0.00890121	N	0.649818	0.00208343	U	NNNU	YES	1	-7479
Pitpnm2	338.267	0.132888	0.650138	N	0.336792	0.0887877	N	0.444258	0.0171653	N	0.657248	8.53e-05	U	NNNU	YES	1	-7897
Ctif	96.8508	0.0582649	0.909584	N	0.227584	0.467965	N	0.340628	0.252874	N	0.772891	0.000790842	U	NNNU	YES	1	-8040
Ttc7b	485.735	-0.0650209	0.835103	N	0.0187275	0.944648	N	0.0905344	0.727122	N	0.627	4.46e-05	U	NNNU	YES	1	-8587
Rpl13a	54.4615	0.458911	0.159578	N	0.529828	0.0545598	N	0.517641	0.0719297	N	0.723248	0.00363212	U	NNNU	YES	1	-860
Sema4a	195.892	-0.333878	0.442313	N	-0.332261	0.367433	N	0.143358	0.760972	N	0.858875	0.00268146	U	NNNU	YES	1	-8852
Ndufaf6	73.9346	0.0930449	0.807836	N	0.282086	0.247189	N	0.541775	0.0106232	N	0.693302	0.000276808	U	NNNU	YES	1	-8931
BC024978	75.1433	0.272988	0.506609	N	0.404456	0.20213	N	0.238457	0.539538	N	0.764453	0.00389899	U	NNNU	YES	1	-9535
1700007K13Rik	10.1056	1.00051	0.188259	N	0.955994	0.155781	N	1.06512	0.117913	N	1.7752	0.00108431	U	NNNU
Gm45632	10.197	-0.298123	0.780773	N	0.30811	0.70414	N	0.62624	0.39516	N	1.36962	0.0105458	U	NNNU
BC049352	10.27	-0.472371	0.674582	N	-0.31357	0.748568	N	0.93492	0.206269	N	1.8557	0.00116885	U	NNNU
Snrpf	10.9454	0.371325	0.677454	N	0.36594	0.622733	N	0.888737	0.151157	N	1.08736	0.0460984	U	NNNU
Adam11	11.3038	0.897114	0.243738	N	1.07489	0.0898888	N	1.16864	0.0670817	N	1.40579	0.013808	U	NNNU
Hps6	11.3959	0.105912	0.924676	N	0.584426	0.358546	N	0.924479	0.113626	N	1.08131	0.0386891	U	NNNU
Dapk2	11.5157	1.08909	0.0551193	N	0.523303	0.407505	N	0.0228808	0.98361	N	1.11498	0.0242027	U	NNNU
Tigd5	11.6203	0.769697	0.368019	N	1.00837	0.138952	N	1.0135	0.153091	N	1.67456	0.00353282	U	NNNU
Tubb4b-ps2	11.6398	-0.135818	0.90588	N	0.464863	0.49727	N	0.334679	0.68607	N	1.21935	0.0174802	U	NNNU
Gpc1	11.6553	0.103591	0.940392	N	0.76747	0.307753	N	0.260563	0.810685	N	1.42587	0.0213106	U	NNNU
2310074N15Rik	11.8992	0.828748	0.325448	N	0.885207	0.215353	N	0.427058	0.654681	N	1.49155	0.0131026	U	NNNU
Zfp428	12.1552	0.825368	0.272401	N	0.670267	0.33221	N	0.691025	0.343301	N	1.33908	0.0157449	U	NNNU
Tubb4b-ps1	12.1804	0.0746594	0.945767	N	0.573663	0.325081	N	0.352246	0.635732	N	1.22412	0.00739883	U	NNNU
Gm45866	12.6266	0.0339763	0.978407	N	0.297594	0.701659	N	0.635532	0.358976	N	1.26727	0.0155069	U	NNNU
Cela1	12.6512	-0.377625	0.707211	N	-0.0285217	0.977192	N	-0.0223919	0.985273	N	1.51629	0.00463988	U	NNNU
5033425B01Rik	12.8492	0.0602026	0.971478	N	0.29965	0.778006	N	1.36415	0.0808158	N	1.4906	0.0413171	U	NNNU
Rpl18-ps2	12.869	0.474315	0.486009	N	-0.06032	0.937964	N	0.495433	0.423344	N	0.934343	0.0456382	U	NNNU
Gm7694	12.8841	-0.185895	0.868798	N	-0.2403	0.776502	N	0.0485921	0.965952	N	1.48602	0.00430334	U	NNNU
Elavl3	12.9808	0.118933	0.926514	N	0.409314	0.617929	N	0.81732	0.260497	N	2.12665	4.35e-05	U	NNNU
Gipc3	13.1691	0.158177	0.877918	N	0.785115	0.166419	N	0.638994	0.321319	N	1.49996	0.00111216	U	NNNU
Fam83g	13.2869	0.924826	0.180792	N	1.10777	0.0526553	N	1.01732	0.0940012	N	1.13463	0.0409955	U	NNNU
Kcng4	13.4049	-0.340231	0.761666	N	-1.20479	0.141568	N	0.519228	0.545573	N	2.55254	4.11e-07	U	NNNU
Slc37a2	13.5538	0.560538	0.436017	N	0.831199	0.129542	N	0.159009	0.864729	N	1.48804	0.0010156	U	NNNU
Itga9	13.9178	0.992934	0.105941	N	0.819376	0.155957	N	1.06984	0.0525432	N	1.60224	0.000528542	U	NNNU
Tcea2	13.9872	0.74491	0.223634	N	0.23456	0.738431	N	0.808717	0.139377	N	1.29517	0.00346495	U	NNNU
Gm3272	14.0189	-0.134312	0.900054	N	0.307967	0.655888	N	0.243892	0.769566	N	1.1102	0.0234414	U	NNNU
B130055M24Rik	14.2504	0.557305	0.439933	N	0.557316	0.363549	N	0.654764	0.293784	N	1.11039	0.0248889	U	NNNU
Mier2	14.3266	-0.127902	0.897723	N	0.138109	0.847128	N	-0.170601	0.841919	N	0.956195	0.0430368	U	NNNU
Neto2	14.5636	0.187736	0.850489	N	0.416703	0.538008	N	0.995921	0.0729411	N	1.21569	0.0143136	U	NNNU
Gm43823	14.6513	0.194543	0.821971	N	0.362384	0.551483	N	0.730321	0.169702	N	1.15798	0.00753277	U	NNNU
Akap5	14.719	-0.035852	0.978407	N	0.200299	0.823502	N	0.700039	0.346025	N	1.35542	0.0190273	U	NNNU
Tnik	15.141	-0.135483	0.893599	N	0.916824	0.069425	N	-0.340986	0.666689	N	1.05234	0.0265721	U	NNNU
Gm10335	15.1962	0.223891	0.780689	N	0.574133	0.276641	N	0.320938	0.638777	N	0.917755	0.042913	U	NNNU
Dqx1	15.917	0.61497	0.286682	N	0.405904	0.467727	N	0.627647	0.234535	N	1.01997	0.0160675	U	NNNU
Gpnmb	16.0941	0.740207	0.474297	N	0.638144	0.482478	N	1.24135	0.113498	N	2.331	0.000240286	U	NNNU
Tgfa	16.1184	-0.250198	0.762496	N	-0.528303	0.387248	N	-0.498165	0.460255	N	1.11408	0.0116898	U	NNNU
Hmcn2	16.2417	0.718213	0.250108	N	0.861517	0.0947889	N	0.22437	0.784137	N	0.988514	0.0419451	U	NNNU
Mpped2	16.4456	0.127616	0.907289	N	0.237945	0.754207	N	0.728051	0.243227	N	1.22403	0.0156345	U	NNNU
Pola1	16.5032	0.0978194	0.92207	N	-0.168439	0.819768	N	0.878422	0.0888835	N	1.07713	0.0194601	U	NNNU
Rnaseh2a	16.7524	0.753389	0.192873	N	0.771948	0.122528	N	0.642561	0.248405	N	0.927866	0.0461824	U	NNNU
Zfp444	16.9769	0.562883	0.339626	N	-0.0589959	0.934695	N	-0.380414	0.579121	N	0.954206	0.0264958	U	NNNU
E130208F15Rik	17.2175	0.110551	0.907373	N	0.737762	0.135506	N	0.592909	0.286088	N	0.925136	0.0417485	U	NNNU
Tnfaip2	17.5711	0.233737	0.803006	N	0.29262	0.68416	N	-0.492439	0.524501	N	1.36867	0.00441551	U	NNNU
Camk2b	18.4789	0.136355	0.912486	N	-0.0392618	0.968274	N	0.688253	0.352604	N	2.64853	5.38e-08	U	NNNU
Gm17586	18.8429	-0.143297	0.867951	N	0.108153	0.872894	N	0.671046	0.177223	N	0.874445	0.0443198	U	NNNU
Arhgef37	19.0007	0.497019	0.696967	N	0.314335	0.779767	N	-0.496511	0.686663	N	2.41788	0.000662615	U	NNNU
Gm47818	19.1787	-0.63201	0.506609	N	-0.946544	0.224107	N	0.903652	0.174624	N	2.99636	1.82e-10	U	NNNU
Usp13	19.7079	-1.09507	0.445315	N	1.52238	0.14788	N	-0.829063	0.547709	N	1.97367	0.0399148	U	NNNU
2900089D17Rik	19.9449	0.749296	0.181034	N	0.570903	0.276968	N	-0.0561385	0.950926	N	1.16407	0.00582547	U	NNNU
AC113540.1	20.2011	0.665872	0.246372	N	0.873205	0.0594374	N	0.866246	0.0718375	N	1.33962	0.000847366	U	NNNU
Padi2	20.2402	-0.961445	0.39469	N	1.45621	0.0709875	N	-1.42506	0.144981	N	1.88307	0.0104778	U	NNNU
Maff	20.5936	-0.103608	0.927595	N	0.0880418	0.916024	N	0.673761	0.303903	N	1.19897	0.0228932	U	NNNU
Gm5787	20.7902	-0.0119188	0.988617	N	0.198316	0.724821	N	0.289143	0.619754	N	0.943186	0.0120088	U	NNNU
Mypop	20.9452	0.341866	0.619377	N	0.206151	0.744896	N	0.511193	0.359758	N	1.51662	7.32e-05	U	NNNU
Zfp862-ps	21.0748	0.752607	0.205086	N	0.718383	0.169189	N	0.925995	0.0651512	N	1.07357	0.0190658	U	NNNU
Trpm4	21.5827	0.642346	0.245841	N	0.47981	0.356595	N	0.790439	0.0950049	N	1.77325	7.75e-07	U	NNNU
Glis2	21.7346	0.713557	0.137197	N	0.43096	0.373693	N	0.580521	0.218718	N	0.888513	0.0224053	U	NNNU
Ppp1r16b	21.823	0.588308	0.288819	N	-0.262929	0.667652	N	0.838585	0.0621599	N	0.996363	0.0142699	U	NNNU
Nhej1	22.0256	0.526419	0.33509	N	0.601433	0.187075	N	0.469202	0.366609	N	0.950509	0.0154419	U	NNNU
Cxcr4	22.1662	-0.117378	0.901832	N	-0.193042	0.77443	N	0.698258	0.175589	N	1.5363	0.000101081	U	NNNU
Pik3c2b	22.3685	-0.354076	0.5323	N	-0.114335	0.836373	N	-0.161244	0.796146	N	0.727721	0.044454	U	NNNU
Gm10327	22.5854	0.603681	0.229917	N	0.558794	0.211446	N	0.765866	0.0720373	N	0.905608	0.0178794	U	NNNU
Mal	23.0633	0.197744	0.750554	N	-0.223877	0.673371	N	0.459135	0.312853	N	1.24911	8.06e-05	U	NNNU
Sema3f	23.1034	1.03978	0.124656	N	0.807481	0.205898	N	0.504274	0.516422	N	1.99445	5.73e-05	U	NNNU
Gm7353	23.9039	-0.084731	0.915992	N	-0.347003	0.5	N	-0.729154	0.135135	N	0.813095	0.0335307	U	NNNU
Rph3al	24.9899	0.0552155	0.948698	N	-0.619748	0.192311	N	-0.235368	0.706583	N	0.99011	0.00702369	U	NNNU
Gm10293	25.0768	0.41774	0.507979	N	0.490569	0.339317	N	0.858775	0.0590701	N	1.06962	0.00870282	U	NNNU
Lbp	25.1392	0.778323	0.373176	N	0.971686	0.17079	N	0.00268053	0.998252	N	1.46388	0.0189905	U	NNNU
B930095G15Rik	25.3525	0.0259984	0.976422	N	0.195022	0.716621	N	0.647357	0.124668	N	1.02593	0.00325814	U	NNNU
Fbxo40	26.1058	-1.10582	0.375022	N	1.67114	0.0630595	N	0.533671	0.671581	N	2.02566	0.0149795	U	NNNU
Gm3809	26.459	0.29302	0.572401	N	0.344053	0.415687	N	0.28478	0.561976	N	0.863209	0.00759036	U	NNNU
Gfra4	26.6872	0.387398	0.571142	N	0.626418	0.223136	N	0.0811293	0.926111	N	1.64945	2.74e-05	U	NNNU
Fam213b	26.7906	0.149506	0.84019	N	0.738183	0.0757224	N	0.769558	0.0702141	N	1.18023	0.000994042	U	NNNU
Tmem206	26.8819	0.310472	0.567118	N	0.267963	0.571343	N	0.518617	0.221674	N	0.939756	0.00505336	U	NNNU
Acap3	26.9925	0.121367	0.860734	N	0.340788	0.449146	N	0.375697	0.427778	N	0.751791	0.0361182	U	NNNU
Fbxl15	27.8364	0.52525	0.276939	N	0.745052	0.0512535	N	0.758193	0.0536129	N	0.834676	0.0212395	U	NNNU
Ttpa	28.0381	-1.12654	0.129617	N	-0.918989	0.172726	N	0.903067	0.153584	N	1.55193	0.00333301	U	NNNU
Vars	28.0382	0.371985	0.471493	N	0.41376	0.33221	N	0.194959	0.733396	N	0.821343	0.0183776	U	NNNU
Map1s	28.0638	0.622469	0.174006	N	0.537432	0.195785	N	0.372719	0.449241	N	0.739012	0.047874	U	NNNU
Gm29667	28.3591	0.175644	0.772587	N	0.351781	0.413372	N	0.291985	0.556035	N	1.00156	0.00170077	U	NNNU
Gm6944	28.61	0.054619	0.943633	N	0.144595	0.777759	N	0.126669	0.837827	N	0.864541	0.0105796	U	NNNU
Gm5559	28.7955	0.45803	0.297682	N	0.503106	0.175548	N	0.45989	0.257886	N	1.28873	5.45e-06	U	NNNU
Pcdh7	28.9431	0.627334	0.10583	N	0.241807	0.579726	N	0.188175	0.719432	N	0.675309	0.0412955	U	NNNU
Gm5903	29.0655	0.285561	0.546791	N	0.349938	0.357937	N	0.231184	0.625578	N	0.721658	0.0190983	U	NNNU
Rpl10a	29.5935	0.495652	0.271264	N	0.563764	0.135706	N	0.620675	0.106889	N	0.912352	0.00489289	U	NNNU
Gm9619	29.6786	0.331521	0.559119	N	0.567172	0.176303	N	0.565084	0.197547	N	1.06777	0.00208098	U	NNNU
Ssbp4	29.7572	0.42946	0.322131	N	0.347147	0.382692	N	0.441009	0.267944	N	1.24389	7.11e-06	U	NNNU
Plk2	30.1424	0.0480564	0.958944	N	-0.128373	0.84137	N	0.185134	0.78846	N	0.94678	0.021596	U	NNNU
Tyw3	30.2369	0.202459	0.726454	N	0.312842	0.475882	N	0.65913	0.0803634	N	0.711537	0.0412955	U	NNNU
Gm10169	30.378	0.48538	0.353917	N	0.376492	0.431905	N	0.411279	0.411526	N	0.792519	0.0407297	U	NNNU
Mfap3l	30.4882	-0.472271	0.383028	N	-0.0918015	0.873887	N	0.483792	0.279055	N	1.3058	5.15e-05	U	NNNU
Gm26569	30.8769	-0.331736	0.618599	N	-0.138816	0.824593	N	0.396136	0.47026	N	1.03549	0.0085022	U	NNNU
Gm5864	31.6008	0.557719	0.301374	N	0.253615	0.647034	N	-0.143925	0.840812	N	0.997706	0.0110106	U	NNNU
Pdlim1	31.8499	0.518782	0.329178	N	0.43034	0.369172	N	-0.00609584	0.994517	N	1.12555	0.00212774	U	NNNU
Mrto4	31.867	0.310572	0.529407	N	0.421356	0.276491	N	0.458819	0.251992	N	0.926346	0.00253464	U	NNNU
Bcdin3d	32.2008	0.260426	0.630749	N	0.302244	0.487936	N	0.479854	0.241027	N	0.817265	0.0134218	U	NNNU
Apobr	32.2163	0.11733	0.839294	N	0.447559	0.198455	N	-0.148308	0.784003	N	1.22305	3.26e-06	U	NNNU
Gm15545	32.4078	0.156198	0.780493	N	0.0950825	0.843835	N	0.0645537	0.91535	N	0.767638	0.0123403	U	NNNU
Got2-ps1	33.0399	0.467719	0.489872	N	0.63943	0.228897	N	0.297448	0.668128	N	1.49075	0.000381456	U	NNNU
BC051226	33.0515	0.386965	0.569497	N	0.450117	0.417195	N	0.670231	0.196506	N	1.59556	5.8e-05	U	NNNU
Gm11539	33.2332	0.275443	0.631042	N	0.125244	0.816842	N	0.183024	0.753642	N	0.724289	0.0495277	U	NNNU
Lemd2	33.3343	0.392641	0.33509	N	0.480361	0.150775	N	0.405677	0.276917	N	0.73647	0.011509	U	NNNU
Mus81	33.8888	0.596403	0.164262	N	0.516813	0.184259	N	0.126329	0.835827	N	0.985356	0.00215198	U	NNNU
Gm12416	34.1042	0.0704669	0.909862	N	-0.0218506	0.965206	N	0.552752	0.094574	N	0.831425	0.00274363	U	NNNU
BC043934	34.3408	0.199473	0.780689	N	0.525456	0.267538	N	0.493177	0.328808	N	1.00176	0.0105743	U	NNNU
Gm4849	34.39	-0.0521707	0.947959	N	0.207702	0.678888	N	0.417506	0.360711	N	0.73278	0.0456027	U	NNNU
Mthfd2	34.8602	0.234994	0.816667	N	0.115358	0.892372	N	0.146238	0.880533	N	1.22807	0.0262067	U	NNNU
Ppp1ccb	35.2522	0.198776	0.668226	N	0.12407	0.764888	N	0.361868	0.314101	N	0.716429	0.00885542	U	NNNU
Arap1	35.3756	0.424123	0.444794	N	0.199913	0.718073	N	0.207654	0.735197	N	1.03893	0.00468488	U	NNNU
Cars	35.4413	-0.394119	0.380055	N	-0.2924	0.471674	N	-0.379491	0.364398	N	0.796431	0.00658202	U	NNNU
Itgae	35.5085	-0.295221	0.544517	N	-0.0930862	0.844639	N	0.498942	0.160388	N	0.829559	0.0043614	U	NNNU
Cactin	35.7621	0.683802	0.0551743	N	0.575212	0.0857618	N	0.530782	0.139377	N	0.628952	0.0497122	U	NNNU
Speg	35.8646	0.662728	0.108198	N	0.550563	0.150881	N	-0.0449346	0.947685	N	0.73722	0.0336476	U	NNNU
Stambpl1	35.9428	0.0784919	0.915915	N	0.540969	0.176469	N	0.382415	0.413542	N	1.15938	0.000322917	U	NNNU
Nt5c3b	36.3172	-0.0677171	0.912364	N	0.0655212	0.884587	N	-0.130228	0.796146	N	0.688541	0.0154574	U	NNNU
Ero1lb	36.4779	0.525353	0.169347	N	0.0908985	0.845455	N	0.44858	0.220834	N	0.655511	0.0335307	U	NNNU
Gm8565	37.168	-0.0585457	0.927977	N	-0.133286	0.768622	N	0.425265	0.247389	N	0.843218	0.00316693	U	NNNU
Taok3	37.9174	0.0541127	0.934912	N	-0.257555	0.543656	N	0.0522663	0.932292	N	0.662625	0.036006	U	NNNU
Gm5844	37.964	0.196186	0.78124	N	0.115375	0.848291	N	-0.313873	0.599156	N	0.87774	0.0284841	U	NNNU
Ttc21b	38.1197	-0.0149798	0.980376	N	-0.240493	0.517874	N	0.142109	0.751437	N	0.730008	0.0050618	U	NNNU
BB218582	38.2773	-0.160366	0.807951	N	0.207976	0.673108	N	0.638434	0.104135	N	0.74955	0.0360515	U	NNNU
Calr3	38.4369	-0.0684147	0.921641	N	-0.467378	0.253078	N	0.0499189	0.93816	N	1.00021	0.00107843	U	NNNU
Mllt11	38.8254	-0.375232	0.409866	N	-0.1265	0.781395	N	-0.411714	0.316261	N	0.696138	0.0229189	U	NNNU
Pfdn6	39.1547	0.354613	0.42232	N	0.556302	0.0977502	N	0.408229	0.289965	N	0.757612	0.0123101	U	NNNU
Pbld1	39.3462	0.247876	0.705565	N	-0.235882	0.676015	N	0.56688	0.226408	N	0.895909	0.0230007	U	NNNU
Ank3	39.3592	-0.100385	0.861423	N	0.408392	0.22404	N	0.230642	0.588178	N	0.710488	0.0122926	U	NNNU
Il2rg	39.4206	0.477198	0.33509	N	0.598371	0.137923	N	0.401711	0.395294	N	0.796895	0.0293506	U	NNNU
Rtn4rl1	39.6003	0.0699166	0.907923	N	0.439548	0.175416	N	0.333216	0.375214	N	1.40133	4.46e-09	U	NNNU
Icam1	40.0388	0.880632	0.0613027	N	0.568205	0.225552	N	0.254369	0.680099	N	0.857338	0.0373185	U	NNNU
Mark1	40.3511	-0.589815	0.170277	N	-0.256962	0.552778	N	0.300568	0.488912	N	0.896987	0.00280198	U	NNNU
Anxa11	40.7942	0.0503379	0.927559	N	0.21627	0.524689	N	0.362135	0.259198	N	0.926364	5.92e-05	U	NNNU
Dnajc18	41.0908	-0.0323959	0.958568	N	-0.0778297	0.855752	N	-0.142072	0.760347	N	0.661009	0.0147787	U	NNNU
Slc1a1	41.4142	-0.164642	0.83466	N	0.322733	0.55629	N	0.222169	0.734462	N	0.931242	0.0255022	U	NNNU
Gm12017	41.5744	0.171075	0.713995	N	-0.0234367	0.960176	N	0.43786	0.182619	N	0.677883	0.013269	U	NNNU
Got2	41.5762	0.296175	0.603735	N	0.434746	0.320158	N	0.412643	0.377295	N	1.07318	0.00162654	U	NNNU
Chrnb1	41.6933	0.19534	0.728402	N	0.609723	0.0904076	N	0.0596352	0.926654	N	0.879486	0.00599037	U	NNNU
Tmem97	41.7187	-0.122764	0.838078	N	0.621898	0.0581151	N	0.564377	0.106459	N	1.08755	9.56e-05	U	NNNU
Dlg3	41.8784	-0.0833353	0.896402	N	0.317823	0.40549	N	0.467892	0.194888	N	0.791842	0.00733476	U	NNNU
[truncated: 1,691 more rows]
