# Supplementary material for: Brown adipocytes local response to thyroid hormone is required for adaptive thermogenesis in adult male mice
Source: eLife. 2022 Nov 14;11:e81996. doi: 10.7554/eLife.81996 (PMC9683793; doi:10.7554/eLife.81996)
Supplement: Figure 2—source data 3. [file elife-81996-fig2-data3.xlsx]

## Sheet: Feuil1
TR direct target genes also occupied by Pgc1⍺
Sorbs3
Wdr81
Cnnm2
Dysf
Pwwp2b
Cyth1
Egln1
Adamts10
Atp2a3
Synpo
Cyp2f2
Usp2
Nrp1
Srl
Chchd10
Prkab1
Ric8b
Ankrd9
Itpk1
Tpra1
Capns1
Lgr6
Macf1
Axin2
Tlcd2
Slc2a4
N4bp2l1
Slc25a33
Hk2
Fzd7
Gpam
Ogdh
Ccdc138
Fosl2
Ptpru
Trim67
Dot1l
Pim3
Fam69b
Trim24
Tef
2300009A05Rik
Aspg
Tead1
Fgf1
Acot11
Plxna1
Ttc7b
Idh3a
Suclg1
Pkn1
Isca2
Cad
Eno1
Ucp1
Acot8
Timp4
Vegfa
Als2cr12
Brd3
Slc25a19
Scarb2
Sh3bp5
Xrcc6
Plbd1
Plcd1
Atp1a2
Mapre3
Ackr3
Mturn
Ctif
Ppargc1b
Tinagl1
Ntsr2
Tlr5
Eif4g3
Cux1
Slc25a28
Fah
Mcrip2
Pygl
D5Ertd579e
Sbno2
Hpdl
Cpn2
Slco4a1
Nr1d1
Notch4
Scyl1
Iffo2
Ldlrap1
Adamts2
Dnaja3
Perm1
Adcy10
Cebpb
Acacb
Zc3h12a
Bcl6
Ppp3cc
Slc25a51
Bcl3
Heg1
Id2
Kcmf1
Ampd3
Mtch2
Adrb2
Cntfr
Snx10
Acsl5
Bicra
Mrps36
Slc25a48
Cradd
Cdk17
Sbk1
G6pdx
Sema4a
Bhlhe40
Hes1
Pald1
Sympk
Sprtn
Slc22a5
Hsp90ab1
Esr1
Foxn3
Zfp691
Glul
Spred2
Smg5
Midn
Pomgnt2
Abcd3
Fzd4
Gpat4
Slc35f6
Slc35e2
Slc1a5
Ucp3
Gtf2ird1
Pnpla2
Map2k3
Gpi1
Irf2bpl
Paqr9
Ergic1
Lgals9
2410131K14Rik
Col27a1
Gde1
Lamc3
Klf13
Hspb1
Sc5d
Alkbh7
Kdm6b
Adcy3
Arhgef12
Pde4a
2810021J22Rik
Cfap54
Nadk
Snx21
Mlxipl
Irak2
Jarid2
Tnip1
Sema4b
Per2
Ghdc
Gpd2
Bmp8b
Gmps
Spsb1
Slc39a14
Trak1
Stat5b
Coa5
Trak2
Itpr2
Slc7a6
Klf15
Megf9
Adtrp
Slc6a19
Dgat2
Htra3
Ppargc1a
Gm826
Epb41
Pnldc1
Foxred2
P2rx5
Serpinh1
2010003K11Rik
Txn2
Fabp3
Dlg1
Ptgds
Atl2
Zfp710
Dusp4
Syt12
Nudt7
Ahcyl1
Hdgfl2
Slc29a1
Ifrd1
Dpf3
Pitpnm2
Pcsk6
Rsad1
Nrg4
