# Supplementary material for: Brown adipocytes local response to thyroid hormone is required for adaptive thermogenesis in adult male mice
Source: eLife. 2022 Nov 14;11:e81996. doi: 10.7554/eLife.81996 (PMC9683793; doi:10.7554/eLife.81996)
Supplement: Figure 4—source data 1. [file elife-81996-fig4-data1.xlsx]

## Sheet: Intructions
COLD RESPONSE in CTRL
log2FC and adjpval refer to the comparison between CTRL mice 4°C and CTRL mice 30°C
Genes "U" are upregulated in CTRL mice at 4°C
Genes "D" are downregulated in CTRL mice at 4°C
TH direct target gene? Indicate if the gene is a TH direct target gene (TRBS within 30kb + sensitive to TH treatment)
COLD RESPONSE in BATKO
log2FC and adjpval refer to the comparison between CTRL mice 4°C and CTRL mice 30°C
Genes "U" are upregulated in CTRL mice at 4°C
Genes "D" are downregulated in CTRL mice at 4°C
TH direct target gene? Indicate if the gene is a TH direct target gene (TRBS within 30kb + sensitive to TH treatment)
INTERACTION
log2FC and adjpval refer to the magnitude of the interaction between cold exposure and the mutations
The lower is the log2FC, the higher the interaction is between cold and the mutations
TH direct target gene? Indicate if the gene is a TH direct target gene (TRBS within 30kb + sensitive to TH treatment)

## Sheet: Cold response in CTRL
Gene	Basemean	log2FC at cold	adjpval	Status at cold	TR direct target gene
2010003K11Rik	171.968	3.8357	1.71e-22	U	YES
2300009A05Rik	663.072	0.857235	0.00159264	U	YES
2310061I04Rik	1614.49	0.734718	0.000227889	U	YES
2410131K14Rik	180.574	0.958907	0.00099463	U	YES
Abcd3	2430.76	2.08693	7.04e-25	U	YES
Abhd6	133.769	1.47297	9e-17	U	YES
Acaa1b	22.3184	3.39647	1.4e-11	U	YES
Acacb	3805.21	1.04102	5.21e-10	U	YES
Ackr3	654.225	1.60371	1.56e-06	U	YES
Acot11	1811.51	4.29921	1.04e-15	U	YES
Acot8	47.7183	2.28533	4.08e-11	U	YES
Acsf2	238.04	0.936011	0.00492712	U	YES
Acsl5	1598.14	4.43789	1.97e-54	U	YES
Actr1a	905.665	0.737523	7.97e-08	U	YES
Adam17	233.492	0.741813	3.12e-05	U	YES
Adcy10	24.9273	4.05831	8.54e-10	U	YES
Adcy3	2687.49	3.28711	3.49e-33	U	YES
Adprhl1	19.9841	2.37695	0.00472445	U	YES
Adtrp	880.448	2.25377	3.52e-16	U	YES
Akt1	508.644	0.940967	0.000347264	U	YES
Alkbh7	119.679	1.2251	3.18e-08	U	YES
Alpl	307.821	2.703	2.17e-21	U	YES
Ankrd9	458.688	3.75203	2.08e-19	U	YES
Arhgef12	2263.21	1.11717	1.98e-17	U	YES
Arhgef15	259.866	1.00054	1.13e-05	U	YES
Arhgef19	15.0229	4.75447	7.19e-11	U	YES
As3mt	180.064	0.902203	0.00167022	U	YES
Aspg	523.84	4.09902	6.35e-41	U	YES
Atad3a	240.183	1.22856	6.32e-08	U	YES
Atl2	1017.8	0.743282	0.0288049	U	YES
Atp1a2	14303.7	0.78645	4.43e-09	U	YES
Atp1b1	422.23	1.40249	0.0310206	U	YES
Atp2a2	3443.54	0.990539	5.35e-06	U	YES
Atp2a3	171.457	0.708918	0.00717845	U	YES
Atp5d	4592.69	1.0512	9.19e-08	U	YES
Aven	67.8961	1.13292	3.46e-06	U	YES
Axin2	95.077	1.34143	0.00168404	U	YES
Bcl3	230.679	2.01776	1.58e-05	U	YES
Bhlhe40	1308.36	1.23311	0.0344637	U	YES
Bmp8b	324.078	6.38208	3.67e-30	U	YES
Brd3	211.735	0.939646	5.51e-08	U	YES
Btf3l4	119.558	1.05685	1.6e-05	U	YES
Cad	179.278	0.794504	0.0140962	U	YES
Ccdc138	25.9724	1.21883	0.034743	U	YES
Ccnd1	75.0332	1.5194	0.000801178	U	YES
Cdk17	470.308	0.699944	0.00502365	U	YES
Cdkn1c	195.686	1.00493	7.64e-05	U	YES
Cend1	109.049	6.17419	2.54e-31	U	YES
Cerk	76.7786	0.662362	0.00167293	U	YES
Cgrrf1	433.025	1.43943	3.3e-11	U	YES
Chchd10	6343.45	1.40253	3.9e-08	U	YES
Chd3	199.785	1.53022	5.11e-07	U	YES
Cipc	361.805	0.661522	2.11e-06	U	YES
Cnn1	45.9286	1.9815	2.89e-05	U	YES
Cnnm2	533.275	3.45109	2.68e-57	U	YES
Coa7	160.87	2.04666	5.83e-26	U	YES
Coq10a	719.928	1.19463	3.78e-07	U	YES
Cpn2	376.513	2.45272	2.5e-21	U	YES
Cradd	76.0533	1.2472	1.96e-08	U	YES
Cux1	710.575	1.69292	4.08e-22	U	YES
Cyb561	22.0549	1.26562	0.00115926	U	YES
Cyp2b10	648.091	8.9453	8.31e-23	U	YES
D5Ertd579e	503.187	1.45181	1.9e-21	U	YES
Ddt	1971.55	1.76263	3.32e-45	U	YES
Ddx39	137.422	1.30376	3.33e-11	U	YES
Dhrs7	1184.92	1.23234	2.38e-05	U	YES
Dhx16	110.018	0.836984	2.44e-05	U	YES
Dhx35	110.487	0.78113	0.000168457	U	YES
Dlat	6483.42	1.54326	1.63e-09	U	YES
Dlg1	452.358	1.08182	1.6e-09	U	YES
Dnaja3	2181.34	1.88422	1.02e-31	U	YES
Dot1l	662.979	1.26844	1.39e-06	U	YES
Dpep1	191.356	1.52092	1.14e-07	U	YES
Dpf3	29.2035	0.794696	0.0401228	U	YES
Dus1l	150.502	0.731209	0.00124556	U	YES
Dusp14	17.5138	1.44	0.0273172	U	YES
Dysf	176.221	1.78614	9.7e-17	U	YES
Egln1	2365.89	2.13256	6.05e-37	U	YES
Eif4e3	1069.76	1.02026	1.49e-06	U	YES
Eif4g3	366.716	0.913747	2.6e-05	U	YES
Eln	105.418	1.96051	1.73e-08	U	YES
Elof1	623.788	2.04611	6.41e-16	U	YES
Engase	21.2107	1.20498	0.0198659	U	YES
Eno1	1760.94	2.0342	3.86e-12	U	YES
Ergic1	1265.53	1.50629	4.31e-13	U	YES
Faap100	59.0227	1.21648	0.00335166	U	YES
Fabp3	769.943	2.13473	2.06e-08	U	YES
Fah	242.71	1.03161	0.000312126	U	YES
Fam69b	80.8824	1.74871	1.97e-07	U	YES
Fastk	534.767	1.269	6.24e-10	U	YES
Fbxl2	21.1802	2.9532	2.08e-11	U	YES
Fgf1	302.04	1.43211	5.48e-06	U	YES
Fkbp4	348.601	0.693492	4.89e-05	U	YES
G6pdx	2242.94	1.02021	1.78e-06	U	YES
Gapdh	151.836	1.36896	0.000108963	U	YES
Gde1	2696.33	2.29195	2.38e-30	U	YES
Ghdc	78.665	1.40529	5.11e-08	U	YES
Glrx5	988.378	1.66145	3.74e-19	U	YES
Glul	7989.77	0.861717	2.16e-06	U	YES
Gm826	69.308	3.90369	7.82e-29	U	YES
Gmps	368.786	1.35568	2.02e-06	U	YES
Gpam	2470.81	2.30891	4.1e-39	U	YES
Gpat4	2543.19	1.42845	1.75e-21	U	YES
Gpd2	8569.09	1.26773	8.88e-05	U	YES
Gpi1	1742.47	1.20738	0.00175633	U	YES
Grn	1485.84	1.18108	8.41e-07	U	YES
Gtf2ird1	88.0156	1.7002	6.96e-07	U	YES
H13	379.483	1.83076	3.44e-18	U	YES
Hccs	902.889	1.43094	1.63e-10	U	YES
Higd1a	207.491	2.10307	2.27e-20	U	YES
Hk2	2460.64	2.7827	4.55e-13	U	YES
Hpdl	90.287	2.8022	1.17e-26	U	YES
Hrh2	55.312	0.799039	0.0215161	U	YES
Idh3a	23703.8	1.6052	5.22e-24	U	YES
Igfbp3	244.365	2.21022	2.25e-10	U	YES
Il15ra	578.726	0.733444	0.00389303	U	YES
Ipo13	97.8155	0.80706	0.0327421	U	YES
Irak2	136.952	0.766114	0.000813275	U	YES
Irak4	49.9515	0.667309	0.0274027	U	YES
Isca2	1169.44	0.997674	2.82e-08	U	YES
Isyna1	90.1067	1.77936	2.8e-07	U	YES
Itpk1	1146.38	0.951674	0.00013209	U	YES
Kansl2	30.8851	1.06611	0.000544813	U	YES
Kcmf1	1469.19	1.12179	2.76e-18	U	YES
Kcnj11	70.1145	2.04714	0.000113477	U	YES
Kif16b	177.171	1.36607	3.3e-08	U	YES
Ldlrap1	263.341	0.983503	1.07e-06	U	YES
Letm1	1871.5	3.00196	2.12e-68	U	YES
Letmd1	7627.99	2.11613	1.37e-26	U	YES
Lgr6	609.833	3.87078	9.93e-45	U	YES
Lman1	1088.86	1.00298	2.67e-12	U	YES
Lmf1	234.15	1.11622	3.05e-06	U	YES
Loxl1	326.901	3.47449	6.68e-36	U	YES
Lrfn3	40.8041	3.00351	3.57e-14	U	YES
Lrrc8d	382.277	1.3169	2.69e-07	U	YES
Macf1	844.664	0.8954	5.87e-07	U	YES
Map2k3	367.864	1.51025	8.39e-10	U	YES
Map2k5	77.1791	1.30205	2.01e-09	U	YES
Mapkapk3	119.984	1.044	0.00379185	U	YES
Mapre3	433.731	1.64662	9.25e-15	U	YES
Mcee	1026.2	1.91999	1.32e-16	U	YES
Mcrip2	1117.89	1.78862	1.42e-14	U	YES
Mef2d	820.057	0.728451	0.00324555	U	YES
Megf9	745.274	0.939101	0.000944392	U	YES
Mgat4b	509.649	0.950122	1.14e-07	U	YES
Mid1ip1	469.39	0.947375	0.00142499	U	YES
Mlxipl	1924.81	0.947015	0.00553359	U	YES
Mpv17l2	380.505	1.98142	1.78e-22	U	YES
Mrpl36	661.452	1.76472	2.58e-24	U	YES
Mrs2	689.909	1.68827	3.77e-25	U	YES
Msrb2	207.089	1.65262	4.38e-12	U	YES
Mt1	8086.81	1.32338	2.68e-05	U	YES
Mtch2	1717.87	1.47706	1.39e-11	U	YES
Mthfd1	112.958	0.69146	0.00763538	U	YES
Mul1	421.635	1.0635	1.15e-07	U	YES
Myo18a	328.873	1.27665	1.49e-13	U	YES
Myo1c	1169.43	1.08759	7.46e-07	U	YES
Naa20	51.8494	1.13228	0.00561756	U	YES
Nadk	2977.07	0.758097	3e-06	U	YES
Ndufaf6	94.4561	0.792123	6.94e-05	U	YES
Nenf	522.446	1.61914	1.21e-23	U	YES
Nradd	19.2442	2.00047	0.000256151	U	YES
Ntmt1	44.7925	1.38448	0.00018353	U	YES
Nudt7	1869.2	1.01808	2.98e-06	U	YES
Nup62	118.685	0.644274	0.00887395	U	YES
Ogdh	20805.8	1.11825	9.01e-09	U	YES
Opa3	160.274	1.37127	3.82e-06	U	YES
Orai1	113.91	0.691854	0.037493	U	YES
Pacsin2	363.653	1.00351	5.99e-09	U	YES
Pald1	254.796	0.681993	0.0215073	U	YES
Paqr9	1131.97	2.79456	7.56e-31	U	YES
Pcsk4	79.8082	0.94151	0.0107356	U	YES
Pcsk6	840.115	0.869828	1.8e-06	U	YES
Pde4a	485.515	1.8018	4.36e-09	U	YES
Pde4c	27.7966	1.32341	9.68e-05	U	YES
Pdhb	2298.23	1.24728	5.39e-05	U	YES
Pdp2	1054.77	0.958692	9.28e-05	U	YES
Perm1	185.053	3.1305	9.39e-13	U	YES
Pgk1	354.053	1.88959	2.47e-16	U	YES
Pgpep1	373.15	1.51088	3.44e-21	U	YES
Phlda3	1514.38	1.01943	0.00188237	U	YES
Pitpna	731.513	0.992705	1.25e-07	U	YES
Pkn1	1443.86	2.10674	4.01e-16	U	YES
Pla2g12a	1558.01	2.24494	1.45e-87	U	YES
Plbd1	1908.45	1.04259	1.68e-09	U	YES
Pld6	34.2514	1.81328	9.39e-06	U	YES
Polr3c	194.208	1.00621	6.32e-13	U	YES
Por	636.544	0.686259	0.0360446	U	YES
Ppard	228.253	0.885395	0.00335989	U	YES
Ppargc1a	513.939	2.56354	5.97e-13	U	YES
Ppp1r14b	353.366	0.957155	0.00152174	U	YES
Prkab1	467.073	1.65557	7.52e-13	U	YES
Proca1	491.425	0.783707	6.6e-07	U	YES
Psph	129.327	1.42275	1.48e-07	U	YES
Ptpn11	549.837	1.00534	1.09e-17	U	YES
Pygl	1755.1	1.63305	2.09e-06	U	YES
Qrsl1	160.809	1.64586	1.23e-19	U	YES
Rab34	262.575	0.747067	0.00972334	U	YES
Rab3a	182.542	1.26679	2.5e-06	U	YES
Rbck1	534.239	1.37742	1.54e-14	U	YES
Rbm28	175.05	1.02916	3.36e-09	U	YES
Rcc1l	41.4419	0.897297	0.00643331	U	YES
Rgl3	166.203	0.982504	0.00404407	U	YES
Ric8b	270.779	0.879135	1.32e-07	U	YES
Rilp	232.752	2.25092	1.4e-22	U	YES
Rom1	43.0458	3.60754	3.28e-22	U	YES
Rpl13a	79.5393	2.57309	8.32e-15	U	YES
Rpl23a	26.2567	1.10722	0.0014751	U	YES
Rsad1	144.361	1.27983	5.82e-13	U	YES
Rxrb	98.873	0.720991	0.00427581	U	YES
Sbk1	565.583	1.3542	9.06e-06	U	YES
Sc5d	1050.45	1.09549	1.72e-06	U	YES
Scarb2	1302.45	1.52717	3.01e-26	U	YES
Scarf1	88.9012	0.996727	0.0103106	U	YES
Scyl1	306.891	1.21862	1.38e-11	U	YES
Sdhaf1	276.798	1.18133	5.24e-12	U	YES
Sdhaf4	799.181	1.26839	2.18e-09	U	YES
Sema4a	258.867	0.80954	0.0153514	U	YES
Serpinh1	1328.72	0.921464	0.00296614	U	YES
Sirt3	290.889	1.04045	2.66e-06	U	YES
Slc25a15	108.894	1.16176	9.57e-10	U	YES
Slc25a19	1195.47	0.720557	0.000442005	U	YES
Slc25a22	1297.42	1.4835	3.82e-11	U	YES
Slc25a33	251.57	1.09077	9.54e-05	U	YES
Slc25a42	1827.57	1.59902	0.000105734	U	YES
Slc25a48	410.558	1.25965	0.000682479	U	YES
Slc25a51	3187.58	1.77892	8.18e-14	U	YES
Slc26a6	47.9473	2.29589	1.52e-11	U	YES
Slc27a2	1918.84	1.24479	1.85e-06	U	YES
Slc29a1	942.857	1.01743	0.00376533	U	YES
Slc2a4	2661.36	1.51199	1.71e-12	U	YES
Slc35f6	322.442	1.36324	4.97e-09	U	YES
Slc35g1	73.4883	2.57001	3.01e-13	U	YES
Slc39a14	229.519	0.904639	0.000321233	U	YES
Slc6a19	29.7562	1.44751	1.79e-05	U	YES
Slc7a6	579.874	1.39073	9.61e-10	U	YES
Slco4a1	132.633	2.74816	8.75e-11	U	YES
Smarcd1	600.994	3.20535	5.47e-23	U	YES
Smg5	143.876	1.03565	2.24e-05	U	YES
Snta1	186.346	1.13345	1.02e-05	U	YES
Snx10	821.285	1.63801	4.84e-10	U	YES
Sorbs3	767.265	0.735573	0.0156226	U	YES
Spsb1	268.286	0.851676	0.000711771	U	YES
Sssca1	126.155	1.72129	4.85e-09	U	YES
Stk16	356.298	1.60217	2.34e-14	U	YES
Syt12	46.2532	2.11653	1.2e-05	U	YES
Tecpr1	342.922	1.4583	1.17e-16	U	YES
Tepsin	83.6126	1.20047	0.000317677	U	YES
Thrsp	20996.2	1.92181	4.27e-10	U	YES
Timp4	1033.06	1.45285	2.56e-10	U	YES
Tlcd1	886.483	1.09338	3.24e-08	U	YES
Tlcd2	96.1401	1.48723	0.000100304	U	YES
Tmem186	219.997	1.56624	2.83e-27	U	YES
Tmem246	262.607	0.760228	0.0050869	U	YES
Tmem41b	105.626	0.778998	0.00015663	U	YES
Tnk2	112.178	1.27487	0.00368084	U	YES
Tomm40	120.941	1.93077	1.68e-19	U	YES
Tpcn1	811.777	1.20123	5.86e-11	U	YES
Tpra1	135.255	0.836657	0.000213505	U	YES
Traf4	550.855	1.71244	5.73e-09	U	YES
Trak1	1125.27	1.25444	4.68e-13	U	YES
Trim67	152.248	2.16199	1.92e-16	U	YES
Trp53inp2	4179.84	1.63825	2.55e-17	U	YES
Ttc38	215.895	0.787329	0.00212244	U	YES
Tuba8	459.773	1.99856	1.79e-16	U	YES
Tubb4b	345.967	1.85451	9.84e-21	U	YES
Txn2	6222.17	1.72236	1.09e-13	U	YES
Txnrd2	102.163	0.820008	0.00115314	U	YES
Ubiad1	253.174	1.72996	2.4e-16	U	YES
Uck2	166.166	1.46013	4.45e-14	U	YES
Ucp1	62887.4	4.40182	4.62e-21	U	YES
Ucp3	652.541	1.6487	0.00673018	U	YES
Uhrf1bp1	159.6	1.0208	2.06e-10	U	YES
Unc5b	40.2899	1.29316	0.00116213	U	YES
Uqcc2	125.433	1.63507	7.72e-12	U	YES
Uqcrc1	2678.13	0.705578	0.00525485	U	YES
Xrcc6	1164.62	1.86646	1.19e-24	U	YES
Yif1b	304.628	1.79956	9.99e-18	U	YES
Zfp691	127.852	1.65932	1.21e-17	U	YES
Zfp710	108.703	0.846353	0.011923	U	YES
Elovl3	3579.55	10.3018	1.74e-32	U	NO
Tacr2	21.7328	9.0273	1.21e-13	U	NO
Cpne5	83.6192	8.64685	1.67e-08	U	NO
Sgk2	80.6981	8.28933	3.42e-19	U	NO
ccdc198	11.8729	7.99749	3.45e-11	U	NO
Rasl10a	11.4635	7.61538	6.3e-11	U	NO
Pla2g2e	24.6158	6.78743	1.13e-12	U	NO
Gm15241	182.771	6.77942	1.29e-23	U	NO
Gm16062	119.97	6.49788	2.04e-40	U	NO
Fam131c	21.3506	6.47929	3.42e-12	U	NO
Slc25a34	200.734	6.16924	9.06e-19	U	NO
2310069B03Rik	329.656	5.7341	5.69e-24	U	NO
Fgf21	11.9094	5.70805	4.77e-08	U	NO
Arhgef37	44.4756	5.63262	4.37e-29	U	NO
Gm34921	10.8806	5.604	7.57e-08	U	NO
Lrrc52	29.4073	5.56188	1.61e-05	U	NO
Gys2	692.904	5.51892	2.86e-98	U	NO
4631405J19Rik	44.9104	5.34774	3.32e-08	U	NO
Gk	2501.93	5.26726	2.98e-52	U	NO
Dhrs9	367.758	5.15389	2.12e-06	U	NO
Gmpr	2700.66	5.06892	1.21e-17	U	NO
Tmem82	17.325	5.05037	2.34e-13	U	NO
Arhgdig	30.3307	4.75599	1.27e-16	U	NO
Ttc25	242.764	4.75042	4.65e-09	U	NO
4930415O20Rik	30.6338	4.67285	5.36e-15	U	NO
Hephl1	54.0752	4.66808	2.14e-07	U	NO
Nnmt	325.43	4.59576	9.57e-39	U	NO
Pimreg	13.1353	4.5755	2.04e-10	U	NO
Gm32591	11.1336	4.57341	1.81e-08	U	NO
Tectb	38.6652	4.46787	8.1e-24	U	NO
AC132455.3	16.228	4.38156	2.55e-09	U	NO
Ftl1-ps1	27.9984	4.37245	0.0118481	U	NO
Hist1h1d	14.5711	4.30635	3.26e-06	U	NO
Cars2	294.394	4.16601	1.82e-70	U	NO
Olfr1396	47.5757	4.07851	1.85e-23	U	NO
Chrna2	35.4698	4.01176	2.2e-15	U	NO
E2f2	43.7689	3.99553	3.21e-25	U	NO
St3gal5	243.367	3.99118	3.87e-09	U	NO
Rspo4	35.7988	3.9787	3.82e-05	U	NO
Ctcflos	430.538	3.90832	2.66e-29	U	NO
Mfsd4b3	46.8046	3.88979	2.09e-18	U	NO
Agpat2	20701	3.8306	3.48e-12	U	NO
Dio2	1759.28	3.82896	0.000533594	U	NO
Bdh1	13.9335	3.81631	2.79e-05	U	NO
Hacd2	2141.12	3.75424	2.06e-61	U	NO
3930402G23Rik	51.6978	3.72429	1.84e-14	U	NO
Mfsd2a	342.487	3.70154	0.00190554	U	NO
Adam12	1152.44	3.68171	8.42e-61	U	NO
Ube2ql1	32.704	3.65207	9.37e-10	U	NO
Ctsz	1932.66	3.63602	8.83e-54	U	NO
Gm42614	12.944	3.61999	3.5e-06	U	NO
Clstn3	743.583	3.61461	1.48e-24	U	NO
Impa2	796.754	3.48775	1.4e-50	U	NO
Fbp1	29.4963	3.47044	6.82e-15	U	NO
Fhdc1	47.5564	3.46949	8.73e-12	U	NO
Ckb	179.962	3.42924	4.65e-24	U	NO
Tmem86b	38.6267	3.34902	2.98e-15	U	NO
Gm12892	32.6787	3.31175	1.17e-10	U	NO
Gm26671	11.7423	3.30879	6.44e-07	U	NO
Dock8	442.286	3.26314	3.44e-30	U	NO
AC153155.2	622.223	3.19854	0.000112754	U	NO
Got1	1015.07	3.16938	4.1e-07	U	NO
Ppil1	104.89	3.16454	2.35e-28	U	NO
Gm45769	179.819	3.16139	3.11e-28	U	NO
Gm36595	18.1784	3.14468	6.38e-08	U	NO
Apmap	1858.43	3.1427	1.74e-138	U	NO
Mlycd	541.602	3.14169	5.06e-69	U	NO
Gm33699	13.5564	3.13152	4.98e-07	U	NO
Fgf9	21.8017	3.1298	8.16e-07	U	NO
Poln	359.467	3.09865	1.48e-46	U	NO
Hsd17b7	229.497	3.0759	1.69e-41	U	NO
Arntl	28.9711	3.07571	4.19e-11	U	NO
Atg4d	294.701	3.07167	2.13e-24	U	NO
Plin2	5174.25	3.06421	1.22e-18	U	NO
Cables1	200.77	3.05395	8.84e-28	U	NO
Kcng4	10.5441	3.04598	0.00444473	U	NO
Cyp1a1	41.8928	3.03851	0.00891305	U	NO
Tfr2	41.7189	3.03649	4.56e-07	U	NO
Il1rn	29.2232	3.03433	1.18e-12	U	NO
Pgd	1829.81	3.02948	1.17e-22	U	NO
AC153155.1	21.1271	3.00036	4.54e-06	U	NO
mt-Rnr1	214723	2.99548	1.73e-33	U	NO
Comtd1	160.046	2.9757	2.15e-19	U	NO
Ffar4	491.038	2.95492	5.35e-05	U	NO
Dnajc22	12.8738	2.95105	2.61e-05	U	NO
Gm3571	37.0362	2.95083	4.17e-10	U	NO
Ramp3	11.6197	2.94614	1.07e-06	U	NO
Cxcl13	16.6634	2.93913	0.000260176	U	NO
Mpzl3	72.5447	2.92865	1.42e-26	U	NO
Gpd1	37875.2	2.92006	6.37e-22	U	NO
Gm13610	20.0488	2.9149	7.62e-09	U	NO
Smyd4	157.457	2.90554	1.06e-22	U	NO
Sorl1	579.965	2.90504	1.25e-14	U	NO
Angptl8	276.09	2.89955	2.66e-06	U	NO
Slc43a2	441.499	2.89651	4.29e-32	U	NO
AC132307.5	31.2601	2.89408	5.49e-12	U	NO
Hist1h4i	15.2338	2.88765	3.29e-05	U	NO
Gm45188	50.2633	2.8834	2.73e-13	U	NO
Elavl3	11.4847	2.85031	7.69e-07	U	NO
Slc39a2	24.4103	2.84341	1.17e-12	U	NO
Rasl2-9	52.4652	2.83424	7.59e-12	U	NO
Rhod	17.4949	2.83162	2.16e-07	U	NO
Slc25a17	1140.01	2.81133	4.85e-51	U	NO
Sqle	218.188	2.80881	8.09e-26	U	NO
Oscar	12.3767	2.80617	1.83e-05	U	NO
Dhcr24	205.877	2.806	3.33e-24	U	NO
Gm15471	47.8464	2.80272	1.44e-08	U	NO
Hebp2	164.759	2.76384	2.66e-14	U	NO
1700037H04Rik	2147.13	2.75979	1.1e-27	U	NO
AC122442.1	231.066	2.7591	2.63e-32	U	NO
Hspb8	376.158	2.75709	3.86e-07	U	NO
Thg1l	50.7542	2.7511	1.6e-19	U	NO
Fam57b	167.917	2.7498	6.84e-12	U	NO
Pfkp	601.233	2.74572	4.09e-38	U	NO
Hsd17b12	3357.5	2.7383	7.96e-49	U	NO
Prelid3b	1421.45	2.72812	2.52e-36	U	NO
Gm48940	10.0207	2.7205	0.000503157	U	NO
Acot1	106.146	2.71638	0.00232388	U	NO
Lamb3	37.6082	2.7026	1.15e-15	U	NO
Sfxn5	207.403	2.69891	2.18e-30	U	NO
A930017M01Rik	38.5647	2.6965	1.81e-17	U	NO
Gm17634	27.2882	2.6956	5.62e-13	U	NO
Pmepa1	2066.11	2.69175	0.00291689	U	NO
Gm45012	14.7253	2.68689	4.55e-05	U	NO
Gm4961	26.7747	2.68071	3.4e-09	U	NO
Pfkl	1117.69	2.67459	1.23e-23	U	NO
S100b	533.828	2.67346	5.08e-14	U	NO
Gm12276	30.8384	2.64671	3.05e-13	U	NO
Mvd	32.9141	2.63931	1.5e-10	U	NO
Ddhd2	1638.71	2.63757	6.43e-24	U	NO
Pdss1	152.769	2.62592	1.15e-20	U	NO
Nebl	13.8725	2.62024	2.26e-06	U	NO
Mrpl46	161.771	2.61964	4.02e-24	U	NO
Shb	316.148	2.61962	4.82e-16	U	NO
Gm7908	340.315	2.61881	1.12e-16	U	NO
mt-Rnr2	270824	2.59909	4.78e-27	U	NO
1700007L15Rik	31.1531	2.59718	6.26e-13	U	NO
Mrpl20	183.534	2.59666	3.95e-32	U	NO
Rmdn3	1300.64	2.58116	4.31e-32	U	NO
Rbp7	279.801	2.57286	1.5e-05	U	NO
Gm11520	11.423	2.56103	5.75e-06	U	NO
Hbb-bt	605.581	2.55629	9.6e-12	U	NO
Tstd3	274.513	2.55619	6.58e-24	U	NO
Pcyt2	327.541	2.55429	9.26e-36	U	NO
Kank4	16.1724	2.55148	1.04e-05	U	NO
Car14	88.7512	2.53756	2.01e-08	U	NO
Mfsd4b1	91.2822	2.53669	2.44e-19	U	NO
Vwa3a	122.121	2.5359	2.64e-20	U	NO
Hemk1	189.868	2.53444	9.63e-18	U	NO
Tmem253	37.3062	2.5339	8.11e-11	U	NO
Pafah2	462.978	2.53322	3.18e-72	U	NO
Apoc3	40.7222	2.52751	6.78e-12	U	NO
Frrs1	60.3666	2.52652	2.96e-23	U	NO
Phf5a	225.036	2.51234	5.24e-25	U	NO
Otop1	1387.65	2.50936	6.8e-23	U	NO
Fdps	16.9886	2.50489	2.68e-05	U	NO
Noxred1	23.996	2.48467	6.28e-07	U	NO
Ptk2b	332.601	2.48334	3.68e-25	U	NO
Aldoa	26465.6	2.48183	2.33e-18	U	NO
Slc3a2	991.405	2.47789	5.17e-20	U	NO
mt-Tq	10.8509	2.4751	3.34e-05	U	NO
Pgp	413.586	2.47328	2.27e-29	U	NO
Gm10638	22.4461	2.47217	1.48e-06	U	NO
Gm16163	18.028	2.47012	4.45e-06	U	NO
Fgfr3	27.1084	2.46929	2.25e-07	U	NO
Rpia	567.236	2.46564	1.13e-25	U	NO
Zswim5	37.2613	2.46523	4.35e-10	U	NO
Alas2	103.978	2.45061	1.87e-11	U	NO
Cyp51	410.499	2.44956	1.59e-41	U	NO
Pex14	308.898	2.44806	4.76e-33	U	NO
B430010I23Rik	111.362	2.44784	1.07e-16	U	NO
Nsdhl	940.92	2.44443	3.58e-18	U	NO
Ppif	1917.18	2.44358	2.94e-31	U	NO
Ctxn1	30.1665	2.43133	2.61e-07	U	NO
Tmem41a	217.638	2.42037	2.4e-29	U	NO
Stmn2	30.2951	2.41895	2.22e-09	U	NO
Cldn1	57.2534	2.41348	7.42e-05	U	NO
Hbb-bs	5337.74	2.41038	4.64e-11	U	NO
Fbp2	376.024	2.40218	2.68e-18	U	NO
Esrrb	23.9275	2.388	2.62e-07	U	NO
Hist2h3c2	20.1691	2.3779	5.52e-06	U	NO
Thoc6	37.4479	2.3762	1.13e-09	U	NO
AC122818.1	12.3282	2.37479	1.27e-05	U	NO
Tmem120a	467.595	2.36686	2e-15	U	NO
Gale	51.0777	2.36344	1.25e-12	U	NO
Sptbn5	14.6938	2.36073	4.52e-07	U	NO
Mpc2	3897.13	2.35284	1.43e-25	U	NO
Tpcn2	30.6919	2.35134	1.36e-10	U	NO
Gm43672	260.373	2.34985	9.97e-29	U	NO
4732491K20Rik	26.5592	2.34659	5.49e-08	U	NO
2022-09-09	518.821	2.3433	2.35e-20	U	NO
Ifi27l2a	542.733	2.34299	2e-05	U	NO
1700029I15Rik	18.4287	2.34244	2.01e-06	U	NO
1110008P14Rik	739.151	2.33956	2.53e-17	U	NO
Tmem88b	29.8501	2.33526	4.32e-12	U	NO
Ric3	184.358	2.33362	8.19e-18	U	NO
Igsf21	95.6457	2.32511	1.67e-14	U	NO
Dnajc11	546.487	2.32498	1.25e-40	U	NO
Ldha	8223.25	2.32384	7.34e-18	U	NO
Hapln4	49.3789	2.32327	4.29e-08	U	NO
3110045C21Rik	12.1405	2.32106	6.33e-05	U	NO
B230377A18Rik	17.7266	2.31923	4.26e-06	U	NO
Timm10b	375.72	2.27801	2.86e-35	U	NO
Plin5	587.754	2.27568	7.76e-29	U	NO
Cytl1	29.3543	2.27349	0.000729157	U	NO
Manf	546.908	2.27095	4.73e-35	U	NO
Srxn1	392.668	2.26819	3.16e-36	U	NO
Fuom	328.397	2.25018	1.73e-33	U	NO
Mkks	195.842	2.24847	1.11e-25	U	NO
2022-03-01	121.147	2.24724	1.12e-08	U	NO
Derl1	1598.04	2.23006	2.74e-22	U	NO
Ciapin1	560.256	2.22237	1.05e-19	U	NO
Hk1	249.839	2.22234	1.08e-17	U	NO
Nudt1	50.5816	2.22148	8.78e-11	U	NO
Gm13186	102.355	2.21292	0.00132296	U	NO
Slc4a4	1555.65	2.21282	4.8e-15	U	NO
Rilpl2	141.197	2.21101	1.45e-18	U	NO
Tmem37	1147.36	2.20966	4.73e-23	U	NO
Tmem147	2110.88	2.2066	8.42e-61	U	NO
Ncan	11.6091	2.20266	0.00225668	U	NO
Gm10851	96.6021	2.20203	5.08e-11	U	NO
Fastkd5	54.8621	2.20202	2.74e-12	U	NO
Pmvk	136.421	2.19799	2.18e-15	U	NO
Ehhadh	1346.01	2.19574	0.000299475	U	NO
Cox10	467.155	2.19362	2.08e-32	U	NO
Armc6	37.0151	2.1923	6.79e-11	U	NO
Atf5	834.848	2.18716	4.69e-15	U	NO
Atp4b	42.2075	2.18233	0.00206105	U	NO
Gm4246	25.8634	2.17631	6.03e-05	U	NO
Gipc1	64.6177	2.16882	3.48e-09	U	NO
Tmed5	2951.19	2.16665	8.05e-13	U	NO
Mrps23	701.366	2.16171	4.46e-37	U	NO
Lpl	56480.2	2.15762	1.08e-23	U	NO
Ripor2	80.6846	2.1528	3.73e-15	U	NO
Hdhd3	60.6883	2.15094	1.22e-08	U	NO
Ppp1r3b	2429.1	2.14631	1.35e-08	U	NO
Gm7463	29.7146	2.14466	5.03e-05	U	NO
Phb	769.42	2.1438	3.22e-48	U	NO
Slc12a2	744.236	2.14267	2.38e-12	U	NO
Ptdss2	480.749	2.13585	4.11e-36	U	NO
Nhej1	29.1899	2.1357	1.56e-09	U	NO
Alkbh3	414.797	2.13231	3.04e-46	U	NO
Mrps2	1248.28	2.12988	3.09e-31	U	NO
Sdc4	994.971	2.12984	5.88e-05	U	NO
Alg1	162.508	2.12738	4.55e-12	U	NO
Fam228b	31.7641	2.12528	1.47e-07	U	NO
Gm37397	18.4472	2.12488	1.73e-05	U	NO
Rbm47	258.062	2.12209	4.75e-20	U	NO
Gm10603	50.2935	2.12196	2.18e-08	U	NO
Cox8b	12310.3	2.12082	1.19e-10	U	NO
Timm10	460.144	2.1176	9.03e-30	U	NO
B430212C06Rik	117.945	2.11691	4.47e-16	U	NO
Fbxo44	177.056	2.11289	1.63e-31	U	NO
Timm8b	1576.39	2.11194	6.17e-49	U	NO
Cabcoco1	81.7171	2.11	3.17e-12	U	NO
Slc25a20	3632.72	2.1096	1.38e-31	U	NO
Scd2	2915.33	2.1044	1.59e-07	U	NO
AC154492.2	35.3617	2.10424	9.48e-07	U	NO
Gm47797	10.6255	2.1024	0.000198455	U	NO
Gm31814	47.0198	2.09997	6.52e-11	U	NO
Grk3	605.049	2.09714	3.44e-18	U	NO
Glrx	229.384	2.09613	1.23e-12	U	NO
Bysl	147.112	2.09187	9.77e-08	U	NO
Rfx2	61.0937	2.08807	7.85e-09	U	NO
Wdr73	141.145	2.08681	4.71e-14	U	NO
Gm5559	52.7186	2.08126	1.51e-08	U	NO
Ndufaf4	603.964	2.08125	6.5e-20	U	NO
Snca	38.6574	2.08009	1.44e-09	U	NO
Cox19	1115.25	2.07949	2.42e-27	U	NO
Avpi1	55.7039	2.07359	2.63e-09	U	NO
Them4	136.734	2.07111	4.43e-24	U	NO
Hist1h4h	14.989	2.06285	0.000650894	U	NO
Dhrs11	495.227	2.06143	4.89e-23	U	NO
Sars2	70.1996	2.05209	1.25e-12	U	NO
Timm9	432.486	2.04963	2.28e-60	U	NO
Mgll	6234.68	2.04919	7.42e-26	U	NO
Mcts2	350.314	2.04563	5.86e-19	U	NO
Atp6v0a2	648.583	2.04192	9.89e-25	U	NO
Ehbp1l1	241.688	2.04145	1.21e-12	U	NO
Cdc34	235.203	2.03793	2.59e-12	U	NO
Nipsnap1	161.512	2.03749	2.32e-17	U	NO
Cmc2	335.366	2.03695	1.46e-19	U	NO
Myl6b	64.9833	2.03517	9.25e-05	U	NO
4931406C07Rik	3745.81	2.02367	7.54e-33	U	NO
Sdf2l1	10.9393	2.02018	0.000215361	U	NO
Gm7436	121.003	2.01687	1.09e-16	U	NO
Arpc5l	657.669	2.01468	5e-24	U	NO
4932422M17Rik	10.7433	2.01105	0.000516952	U	NO
Hey1	90.7117	2.00853	8.29e-15	U	NO
Slc16a1	2438.24	2.006	7.82e-19	U	NO
Hist1h1c	328.97	2.00496	1.01e-08	U	NO
Endog	381.653	2.00125	5.5e-23	U	NO
Rpl39l	19.91	2.0002	0.000711405	U	NO
Lamtor1	182.753	1.99756	1.54e-18	U	NO
Tpgs1	67.1275	1.99374	2.91e-11	U	NO
Msantd3	211.923	1.98996	3.05e-16	U	NO
Coa3	801.616	1.98775	7.42e-22	U	NO
Adat2	28.8163	1.98318	2.14e-09	U	NO
Cycs	228.06	1.98254	6.41e-12	U	NO
Aacs	694.887	1.98212	0.000168154	U	NO
Slc52a2	75.1384	1.98031	3.01e-13	U	NO
S1pr5	27.2907	1.97923	2.75e-06	U	NO
Kcnk3	1900.89	1.97834	6.83e-16	U	NO
Abhd15	115.094	1.97569	8.26e-12	U	NO
Msrb1	762.876	1.97543	3.96e-18	U	NO
Unc119b	110.697	1.96996	5.44e-25	U	NO
Nsun5	150.551	1.9697	1.23e-20	U	NO
Mtor	1308.3	1.95873	6.05e-40	U	NO
H2-Q10	1082.37	1.9561	2.54e-14	U	NO
Tomm6	14.6978	1.95453	3.86e-05	U	NO
Gm16470	12.9484	1.95379	0.000118893	U	NO
Esrra	348.518	1.9532	2.32e-17	U	NO
Pex16	163.628	1.95263	7.5e-13	U	NO
Elovl6	9408.97	1.95251	5.18e-12	U	NO
Plpp1	395.207	1.95248	6.38e-16	U	NO
Nme1	224.774	1.94932	2.5e-31	U	NO
BC028528	192.648	1.94924	9.57e-09	U	NO
Mrpl47	375.593	1.94869	2.72e-20	U	NO
Fbxl6	114.552	1.94317	6.83e-16	U	NO
Coprs	22.9204	1.94151	1.16e-07	U	NO
Asf1b	62.0311	1.94019	2.4e-07	U	NO
Nmb	70.5616	1.93792	1.49e-10	U	NO
Mrpl54	520.907	1.93773	7e-24	U	NO
Srms	10.6196	1.93266	0.00404441	U	NO
Taldo1	2101.94	1.92957	1.25e-14	U	NO
Coq3	259.305	1.9278	7.38e-27	U	NO
Timm22	210.782	1.92441	3.44e-21	U	NO
Hp	2751.21	1.9237	1.93e-12	U	NO
Cdkn1a	881.843	1.92359	4.2e-06	U	NO
Sco2	109.093	1.92323	5.34e-15	U	NO
Gm9791	157.401	1.92132	8.66e-09	U	NO
Gm47451	318.186	1.9212	6.35e-07	U	NO
Hist1h2bc	212.138	1.91657	1.07e-06	U	NO
Npnt	12.2732	1.91583	0.00188574	U	NO
Emc6	1128.78	1.9146	1.26e-30	U	NO
Lrrc20	165.148	1.91266	0.00013478	U	NO
Sdk2	88.8206	1.90871	1.04e-14	U	NO
Slc25a39	2130.77	1.90722	2.63e-24	U	NO
Pmf1	144.949	1.90651	4.09e-12	U	NO
Gm26569	17.2378	1.90473	0.000936448	U	NO
Psmc4	706.842	1.90074	5.63e-15	U	NO
Agpat3	3165.84	1.9007	7.83e-24	U	NO
Gm11773	12.954	1.8959	0.00280152	U	NO
Lsm4	207.104	1.89351	1.29e-08	U	NO
Rflnb	310.919	1.88138	8.3e-21	U	NO
Pdhx	1059.8	1.88123	1.39e-29	U	NO
Tmem110	272.879	1.88019	6.85e-18	U	NO
Stard5	227.195	1.872	1.32e-21	U	NO
Rabl3	119.145	1.87102	2.26e-15	U	NO
Gm47595	85.8926	1.8688	8.7e-12	U	NO
Glis3	19.7081	1.86819	0.00632314	U	NO
Ndufa11b	1041.18	1.86523	3.05e-11	U	NO
Rapgef4	36.6365	1.86326	3.13e-06	U	NO
Gm5452	16.2576	1.86262	0.000593148	U	NO
Gm5510	72.7199	1.86251	4.46e-10	U	NO
Hadha	10115.4	1.86158	1.73e-15	U	NO
Pmm1	278.254	1.86092	1.65e-15	U	NO
Gm32817	337.899	1.86005	8.66e-10	U	NO
Nr1h3	356.693	1.8598	3.86e-11	U	NO
8430422M14Rik	13.4981	1.85837	0.000347264	U	NO
Lncbate1	416.177	1.85796	4.95e-15	U	NO
Eaf2	34.1534	1.85503	8.93e-07	U	NO
4930466K18Rik	10.6007	1.85422	0.00240517	U	NO
Cib2	2453.58	1.84914	5.86e-19	U	NO
Usp43	25.705	1.84625	6.8e-05	U	NO
Tyms	25.3032	1.84231	1.06e-06	U	NO
Diablo	133.693	1.84117	2.22e-17	U	NO
Slc2a4rg-ps	39.8271	1.84088	9.88e-08	U	NO
Ephx2	2794.85	1.84006	2.96e-25	U	NO
Sh3pxd2a	1614.4	1.84002	5.67e-07	U	NO
Bscl2	1248.01	1.83862	7.8e-16	U	NO
Rab26os	24.3349	1.83592	1.42e-05	U	NO
Mogat1	74.493	1.83069	1.95e-10	U	NO
Gm32200	40.3365	1.83055	1.47e-05	U	NO
Gm28883	46.9058	1.82953	4.86e-07	U	NO
Mppe1	65.6112	1.82785	1.56e-08	U	NO
Rinl	26.7145	1.82685	9.31e-07	U	NO
Insl6	27.0922	1.82585	3.45e-07	U	NO
Fabp3-ps1	576.657	1.82504	3.2e-06	U	NO
Utp14b	117.175	1.82423	1.7e-05	U	NO
Gm9803	1651.3	1.82008	5.82e-26	U	NO
Gm30918	72.5657	1.81755	2.57e-07	U	NO
Mrps11	157.048	1.81717	3.59e-11	U	NO
Pigo	149.361	1.81627	1.49e-13	U	NO
Efr3b	80.9503	1.81523	2.69e-14	U	NO
Ppm1m	483.568	1.8139	8.9e-16	U	NO
Gm49759	112.576	1.81269	7.55e-06	U	NO
Dgat1	934.532	1.81073	1.49e-08	U	NO
Rexo2	831.438	1.809	7.72e-16	U	NO
Sod2	6689.34	1.80745	1.14e-15	U	NO
Trp53rkb	10.7476	1.80626	0.00264822	U	NO
Gm8069	158.435	1.806	3.01e-13	U	NO
Flad1	283.702	1.8045	1.16e-21	U	NO
Mterf2	113.467	1.80311	2.23e-09	U	NO
Ccdc69	177.858	1.79925	1.87e-11	U	NO
Dohh	31.1888	1.79759	1.86e-05	U	NO
Ptcd2	380.582	1.79509	8.09e-23	U	NO
Bvht	31.8587	1.79482	1.76e-07	U	NO
Pam16	55.0296	1.79337	6.15e-09	U	NO
Gpaa1	206.025	1.79119	1.61e-09	U	NO
Mrps27	253.323	1.79115	5.07e-29	U	NO
Uros	244.095	1.7907	2.68e-16	U	NO
Atp6v0c-ps2	19.6166	1.79018	0.000895916	U	NO
Hip1r	77.4606	1.79012	4.9e-06	U	NO
Gm5507	13.2519	1.78913	0.0160107	U	NO
Crat	10695.3	1.78911	9e-17	U	NO
Upp1	14.7858	1.78858	4.36e-05	U	NO
Tmx4	599.752	1.78746	2.83e-12	U	NO
Tysnd1	1434.43	1.78347	1.29e-08	U	NO
Tbrg4	338.257	1.78309	7.24e-24	U	NO
Pde7b	132.677	1.78202	1.92e-05	U	NO
Snap47	224.047	1.78197	2.16e-24	U	NO
Ccdc51	37.3497	1.78143	1.49e-08	U	NO
Cox20b	211.559	1.77722	6.74e-11	U	NO
Trir	319.663	1.77644	3.85e-11	U	NO
Sox18	636.103	1.77449	9.18e-08	U	NO
Eef1akmt1	138.354	1.7724	9.33e-19	U	NO
1810034E14Rik	43.7159	1.77215	5.96e-09	U	NO
Acsf3	451.546	1.77136	3.19e-18	U	NO
Hpd	13.1661	1.76993	0.00235484	U	NO
Gars	1017.98	1.76986	1.87e-30	U	NO
Ltc4s	49.8375	1.76965	2.53e-06	U	NO
Gchfr	11.8811	1.76898	0.00136602	U	NO
Dhh	11.3991	1.76894	0.00245642	U	NO
Lrp10	593.355	1.7685	4.7e-14	U	NO
Rnf7	873.227	1.76714	7.33e-19	U	NO
Chmp6	101.855	1.76664	6.76e-15	U	NO
Spaca1	17.4489	1.7663	0.00346661	U	NO
Gstm6	18.6915	1.76592	0.000308798	U	NO
Cox7a1	2000.44	1.76537	1.14e-17	U	NO
Grpel1	1012.1	1.76506	7.72e-20	U	NO
Gm12017	23.3174	1.76311	0.00427165	U	NO
Mrps5	284.682	1.76088	2.18e-15	U	NO
Leo1	69.6209	1.75688	3.18e-10	U	NO
Poldip2	1183.25	1.75674	1.18e-23	U	NO
Abcb9	102.754	1.75535	1.43e-10	U	NO
Fam181b	24.5305	1.75176	0.00317503	U	NO
Mpdu1	557.475	1.75164	3.84e-23	U	NO
Mrpl12	676.473	1.75095	7.85e-21	U	NO
Zfp335os	14.8375	1.75061	0.000243823	U	NO
Zbtb40	54.1127	1.74762	1.5e-09	U	NO
Gm14270	111.885	1.74429	2.26e-08	U	NO
Hspe1-ps3	11.224	1.74269	0.00652677	U	NO
Hmgcs1	634.218	1.7412	3.27e-09	U	NO
Mapk13	11.7096	1.7411	0.0423156	U	NO
Rab5if	1698.78	1.74052	8.24e-33	U	NO
Mrpl43	449.205	1.7391	6.48e-24	U	NO
Cpt2	7129.3	1.73786	2.43e-20	U	NO
Ndufb2	153.804	1.73645	4.86e-17	U	NO
9330020H09Rik	50.0517	1.73607	7.03e-11	U	NO
Acp5	1244.38	1.73345	8.4e-15	U	NO
Cdc34b	91.6352	1.73286	9.01e-13	U	NO
Fam173b	110.851	1.7316	5.43e-18	U	NO
Atp6v0b	232.473	1.72266	3.43e-12	U	NO
Abhd5	1254.54	1.72179	4.32e-21	U	NO
Dnajc25	322.213	1.72098	1.21e-19	U	NO
AC114990.1	152.338	1.71818	3.23e-05	U	NO
Atpaf2	1324.03	1.71773	8.53e-13	U	NO
Ifi27	2886.7	1.71565	2.26e-13	U	NO
Exosc4	217.679	1.71485	4.32e-23	U	NO
Acadvl	4068.53	1.71452	6.44e-15	U	NO
Med24	186.032	1.71415	2.4e-14	U	NO
Fam107a	55.0273	1.71379	5.3e-06	U	NO
Xylt1	36.9351	1.71156	9.23e-06	U	NO
Hmox2	595.928	1.70807	2.42e-27	U	NO
Gm14017	148.862	1.70526	1.86e-09	U	NO
Tomm22	490.449	1.70472	1.04e-28	U	NO
Gm12222	94.7074	1.70256	0.000624675	U	NO
Gm9619	24.2806	1.70251	0.00845187	U	NO
Syp	59.1322	1.69985	2.14e-12	U	NO
Eng	1295.42	1.69862	3.05e-13	U	NO
Cox15	436.362	1.69859	2.71e-27	U	NO
Mtfp1	489.121	1.69703	4.76e-24	U	NO
Ube2f	481.457	1.69591	4.27e-19	U	NO
Amacr	236.22	1.69494	1.59e-16	U	NO
Alg3	112.292	1.69488	1.55e-08	U	NO
Flcn	835.578	1.69414	4e-20	U	NO
Slc11a2	346.915	1.69271	2.14e-42	U	NO
C1rl	43.7971	1.69051	1.26e-07	U	NO
Apex2	109.769	1.68804	4.84e-11	U	NO
Fam241a	200.281	1.68619	2.85e-13	U	NO
Cfap69	15.2161	1.68442	0.00902781	U	NO
Pop7	225.666	1.68321	1.63e-23	U	NO
Pigq	800.458	1.68208	5e-17	U	NO
Gm49396	23.4197	1.6792	4.35e-05	U	NO
Aars2	120.501	1.67773	3.21e-13	U	NO
Cyp2u1	845.743	1.67449	7.55e-21	U	NO
Tmem35a	19.5341	1.67437	0.00329659	U	NO
Polr1d	1104.25	1.67341	6.1e-29	U	NO
Fbxl15	23.1348	1.67004	0.000413012	U	NO
Nubp1	59.6912	1.66831	4.13e-06	U	NO
P2rx1	11.1043	1.66725	0.00755869	U	NO
Slc41a2	36.005	1.66644	1.82e-06	U	NO
Pkm	2902.67	1.66471	2.43e-13	U	NO
Crispld1	19.8828	1.66377	5.73e-05	U	NO
Dhrs7b	686.278	1.66311	2.85e-19	U	NO
Mrpl27	143.019	1.6629	1.07e-12	U	NO
Acly	8468.8	1.66098	0.010851	U	NO
Defb42	11.1165	1.65985	0.0350161	U	NO
Scand1	66.9172	1.65649	3.37e-06	U	NO
Tarm1	22.3331	1.65579	2.44e-05	U	NO
Gm26588	12.2777	1.6557	0.00400692	U	NO
Gm49284	26.3051	1.65316	4.57e-06	U	NO
Msmo1	301.648	1.65263	5.56e-17	U	NO
Lpin1	6655.78	1.65261	2.98e-18	U	NO
Gm12168	32.1871	1.65183	8.15e-07	U	NO
Tmem208	145.176	1.65133	4.63e-15	U	NO
Gm4217	20.6343	1.65099	0.0192492	U	NO
Lman2	2121.1	1.64971	3.95e-30	U	NO
Uqcr10	5138.17	1.64858	6.98e-16	U	NO
Tmem14c	1635.87	1.64659	2.04e-24	U	NO
Nat8l	791.227	1.64622	2.99e-13	U	NO
Cyb5rl	43.3275	1.64601	9.67e-06	U	NO
Slc9a3r2	652.225	1.64596	4.62e-10	U	NO
Atp5mpl	856.717	1.64512	8.04e-25	U	NO
Fez2	325.833	1.64454	7.46e-20	U	NO
Tsen54	26.749	1.64333	4.72e-05	U	NO
Lrrc39	325.749	1.64012	6.53e-11	U	NO
Wdr83	45.7445	1.64001	1.08e-07	U	NO
Fam162a	1154.64	1.63979	1.27e-42	U	NO
Lipa	1354.81	1.63693	9.11e-19	U	NO
Rtn4ip1	334.827	1.63653	3.92e-15	U	NO
Lsm1	154.92	1.63603	2.14e-13	U	NO
Rhot2	748.928	1.63543	1.32e-23	U	NO
Nr2f6	199.547	1.63402	1.96e-10	U	NO
Me1	2392.08	1.63359	0.00271403	U	NO
Gm6316	31.0757	1.63307	5.13e-06	U	NO
Ldlr	488.99	1.62455	1.06e-08	U	NO
Psma6	1246.52	1.62387	8.07e-26	U	NO
Ubac1	346.311	1.62356	5.27e-18	U	NO
Ttc19	273.898	1.62143	6.83e-16	U	NO
Map2k3os	59.6407	1.62129	6.21e-12	U	NO
Krt10	45.099	1.62091	1.97e-06	U	NO
Fasn	56629.4	1.62087	2.51e-05	U	NO
Mtx1	310.424	1.62073	7.99e-10	U	NO
Chst11	252.074	1.62035	8.56e-10	U	NO
Tsfm	99.393	1.61921	4.14e-11	U	NO
Ppl	18.8552	1.61917	0.0020008	U	NO
Smdt1	1387.72	1.61889	5.1e-19	U	NO
Gm3809	18.3715	1.6159	0.00597699	U	NO
Gm12497	13.0615	1.61536	0.029527	U	NO
Neat1	3874.65	1.61488	2.63e-15	U	NO
Atox1	1024.98	1.614	4.13e-12	U	NO
Gm3272	13.4414	1.61346	0.00284014	U	NO
Fam104a	138.714	1.61265	2.3e-12	U	NO
Med27	74.6671	1.61231	4.02e-10	U	NO
Kcnb1	522.346	1.61101	1.37e-05	U	NO
Gm32389	14.6836	1.61088	0.00653672	U	NO
Gm7984	255.427	1.61008	6.78e-14	U	NO
Mmp19	177.4	1.60932	3.61e-14	U	NO
Gin1	78.2702	1.60898	1.4e-11	U	NO
Egln3	286.698	1.60748	5.79e-07	U	NO
Gm45495	18.3793	1.60653	0.00125552	U	NO
BC004004	1482.26	1.60561	9.06e-24	U	NO
Pgs1	83.4262	1.60484	7.51e-11	U	NO
9630013D21Rik	90.3116	1.60312	8.97e-07	U	NO
Pak1ip1	332.926	1.60244	3.18e-12	U	NO
Gm20300	164.176	1.60189	5.94e-08	U	NO
Mrps22	262.446	1.60021	2.27e-08	U	NO
Gm42067	31.7978	1.59917	0.00103937	U	NO
Slc25a45	59.4755	1.59737	4.82e-07	U	NO
Fastkd2	170.72	1.59294	2.6e-09	U	NO
B430219N15Rik	28.1822	1.5928	1.78e-05	U	NO
Hspa8	1058.24	1.59098	3.83e-09	U	NO
Rnls	22.3064	1.59093	0.000337848	U	NO
Atp6v1e1	1120.81	1.5901	1.42e-20	U	NO
Gm8756	171.19	1.5901	0.000463528	U	NO
Gramd1b	178.731	1.58475	2.92e-05	U	NO
Msra	448.37	1.58385	6.58e-21	U	NO
Yars	137.975	1.58381	9.52e-22	U	NO
Dpy19l1	163.897	1.58327	6.14e-14	U	NO
Otud3	10.8103	1.58126	0.0186335	U	NO
Lamp1	3567	1.57962	1.09e-21	U	NO
Nt5m	180.696	1.57938	1.17e-17	U	NO
Mpc1-ps	1176.15	1.57721	1.37e-10	U	NO
Mrpl58	281.97	1.57696	5.81e-20	U	NO
Ndufaf1	957.426	1.57688	1.48e-11	U	NO
Myo19	156.875	1.57491	3.61e-14	U	NO
Gm11222	12.1208	1.57386	0.00342174	U	NO
Sox5os4	14.7645	1.571	0.0025402	U	NO
Nudt19	879.739	1.56976	8.25e-22	U	NO
Ap1b1	317.078	1.56919	2.72e-15	U	NO
Urb1	197.244	1.56837	1.69e-06	U	NO
A230065N10Rik	22.1128	1.56659	5.95e-05	U	NO
2810001G20Rik	26.8031	1.56596	4.58e-06	U	NO
Gm45606	11.6518	1.56563	0.00762816	U	NO
Rita1	44.3069	1.56554	8.23e-07	U	NO
Sphk2	126.523	1.56518	1.67e-07	U	NO
Lurap1	370.78	1.56227	4.93e-09	U	NO
Lclat1	509.263	1.56006	3.44e-18	U	NO
Tbc1d20	1846.86	1.55926	4.32e-18	U	NO
Gas2l1	299.577	1.55914	5.74e-15	U	NO
Aars	267.467	1.55678	3.88e-10	U	NO
AC100212.3	36.8035	1.55595	2.54e-06	U	NO
2810030D12Rik	60.3622	1.55222	1.01e-06	U	NO
Pex11g	48.1762	1.55195	1.36e-05	U	NO
Gfm1	874.349	1.55155	1.67e-19	U	NO
Psmd12	475.143	1.55144	2.98e-12	U	NO
Nol4l	213.993	1.55111	1.35e-16	U	NO
Uqcc3	209.65	1.54837	4.22e-13	U	NO
Ubxn8	156.366	1.54762	1.51e-15	U	NO
Pgap2	271.012	1.54716	8.76e-13	U	NO
Tmem132a	16.9213	1.54629	0.00191104	U	NO
Cops9	3025.46	1.54603	1.19e-31	U	NO
Dynll2	819.522	1.54449	1.69e-17	U	NO
Insyn1	26.3397	1.54412	9.95e-05	U	NO
Cox11	309.997	1.54403	2.68e-08	U	NO
Gm3222	11.9683	1.54195	0.0318454	U	NO
Nsun3	155.452	1.54162	3.58e-10	U	NO
Mrpl15	654.69	1.54097	2.66e-20	U	NO
Gm10032	292.931	1.54032	5.8e-05	U	NO
Shox2	33.9316	1.53947	0.0010654	U	NO
Cox20	835.571	1.53901	3.93e-11	U	NO
Mrm2	110.927	1.53878	8.24e-13	U	NO
Tomm5	79.2777	1.53794	0.000512066	U	NO
Etfdh	4484.72	1.53771	8.07e-15	U	NO
Pepd	185.678	1.53715	3.16e-09	U	NO
Tmem199	97.8269	1.5346	3.11e-11	U	NO
Rdh13	187.433	1.53355	1.36e-10	U	NO
Polrmt	126.312	1.53143	1.1e-10	U	NO
Rab24	66.9432	1.5309	4.25e-09	U	NO
Zbtb3	10.6395	1.52862	0.0300834	U	NO
Gm3695	10.042	1.52799	0.0154288	U	NO
Mrap	1273.45	1.52698	3.24e-10	U	NO
D8Ertd738e	410.617	1.5266	4.13e-11	U	NO
Ppcs	97.6388	1.52562	8.83e-06	U	NO
Chchd4	541.789	1.52444	8.38e-15	U	NO
Gm5787	16.8482	1.52425	0.0123187	U	NO
Fdxacb1	126.417	1.52383	4.31e-15	U	NO
Agpat1	798.825	1.52321	3.28e-07	U	NO
Mtx2	376.877	1.52318	4.86e-13	U	NO
Gm13552	47.0319	1.52184	3.2e-06	U	NO
Tmem8	70.5204	1.51985	2.85e-09	U	NO
Tigar	258.637	1.51842	9.35e-16	U	NO
Ccdc91	232.4	1.518	1.34e-10	U	NO
Mcc	495.838	1.51733	1.27e-17	U	NO
Rbks	35.4201	1.51715	2.2e-05	U	NO
Tmem273	19.3813	1.51683	0.000307226	U	NO
Myrip	39.8874	1.51656	0.0136417	U	NO
Gm10221	88.8535	1.51633	0.00207526	U	NO
Gm10293	16.3244	1.5158	0.0248723	U	NO
Tbc1d9	62.137	1.51522	4.42e-08	U	NO
Ppp1r1a	317.069	1.51349	2.81e-10	U	NO
Gm17229	10.4803	1.51342	0.0326709	U	NO
Gm15186	14.0284	1.51314	0.0122309	U	NO
Cnst	945.784	1.51259	2.06e-10	U	NO
Gm9790	193.097	1.51168	2.3e-07	U	NO
Gon7	29.9163	1.51148	2.61e-05	U	NO
Hspbp1	65.8832	1.51138	8.15e-07	U	NO
Afg1l	639.206	1.5099	4.41e-17	U	NO
Mir6236	13.0165	1.50948	0.0308573	U	NO
Otulin	181.007	1.50807	4.07e-13	U	NO
Uqcrfs1	11772.1	1.50799	2.26e-24	U	NO
Gm5037	24.9515	1.50687	0.000610676	U	NO
Acsl1	18809.4	1.50656	8.37e-14	U	NO
Bnip1	97.7041	1.50637	2.32e-08	U	NO
Sgcd	71.111	1.50612	1.23e-11	U	NO
Adal	66.4724	1.50558	2.87e-09	U	NO
Pop5	355.437	1.50551	1e-24	U	NO
Timmdc1	133.28	1.50491	6.51e-16	U	NO
Eif1ad	306.71	1.50417	5.74e-16	U	NO
Mlx	415.574	1.50125	2.01e-24	U	NO
Atp6v1d	810.963	1.49952	6.68e-16	U	NO
Ptges2	329.9	1.49914	4.59e-08	U	NO
Stoml2	224.175	1.49747	3.07e-20	U	NO
Rbx1	218.892	1.49334	1.32e-29	U	NO
Gm17484	12.6747	1.49322	0.038105	U	NO
Spata17	29.3398	1.49306	8.81e-05	U	NO
Ndufab1	1551.27	1.492	7.46e-09	U	NO
Lrp11	26.2337	1.48845	5.57e-05	U	NO
Gm3671	11.0312	1.48806	0.0326871	U	NO
Gm10643	11.3102	1.48765	0.0291991	U	NO
Pmm2	555.082	1.48725	8.21e-14	U	NO
Fahd1	366.616	1.48536	1.19e-16	U	NO
2310039H08Rik	488.074	1.47995	4.11e-16	U	NO
Mlst8	71.0838	1.47827	1.48e-05	U	NO
Scamp5	40.4538	1.47767	6.75e-05	U	NO
Mrps18a	447.243	1.47615	3.33e-23	U	NO
Phf19	24.049	1.47538	0.000329032	U	NO
Mob1b	559.574	1.47508	4.82e-09	U	NO
Gm15879	12.5903	1.47497	0.0064362	U	NO
Med8	138.363	1.47448	2.04e-15	U	NO
Fam49b	254.813	1.47331	6.07e-15	U	NO
Calm1	4706.8	1.47271	5.72e-36	U	NO
Tiam1	77.9812	1.47264	0.000403932	U	NO
Bop1	69.1368	1.47252	1.48e-06	U	NO
Slc18b1	431.868	1.47219	8.39e-17	U	NO
Gm3200	22.5445	1.47152	0.0109734	U	NO
Mad1l1	21.1726	1.47121	0.000792243	U	NO
Adap1	46.6205	1.47054	0.0105184	U	NO
Ctsd	2913.18	1.47049	6.41e-12	U	NO
Mmab	484.327	1.46781	1.21e-17	U	NO
Tmem126a	417.66	1.46135	5.9e-19	U	NO
Gm43305	63.1433	1.45842	0.00724497	U	NO
Rpp14	317.376	1.45703	2.19e-19	U	NO
B4galt4	115.979	1.45658	3.61e-16	U	NO
Rmdn1	158.847	1.45643	9.22e-07	U	NO
Smim12	72.1412	1.45641	2.01e-06	U	NO
Card19	622.62	1.45608	2.14e-17	U	NO
Atp6v0e	3437.59	1.45593	3.61e-16	U	NO
Gm12906	103.368	1.45427	1.1e-05	U	NO
Rps4l	365.598	1.45427	3.32e-15	U	NO
Ctdnep1	325.947	1.45421	1.02e-11	U	NO
Wdr25	10.961	1.45415	0.0255383	U	NO
Spsb3	90.0913	1.45363	1.24e-09	U	NO
Gm14167	11.3885	1.4531	0.0121718	U	NO
2022-03-03	26.5587	1.45284	0.000334631	U	NO
Pus1	50.7158	1.45117	2.2e-07	U	NO
Ncbp1	251.924	1.45116	8.27e-15	U	NO
Akr1b8	159.206	1.44998	2.26e-09	U	NO
Spag1	27.5389	1.44834	3.97e-05	U	NO
AC132307.3	15.266	1.44799	0.0164576	U	NO
Gm35986	35.3827	1.44794	0.00167506	U	NO
Mrpl16	447.783	1.44789	2.93e-13	U	NO
Pkn3	29.8594	1.44766	0.00118337	U	NO
Gm11224	151.391	1.44629	0.000107978	U	NO
AC113961.1	10.849	1.44498	0.00682246	U	NO
Ccnq	119.474	1.44373	1.27e-09	U	NO
Gnptg	136.917	1.44367	1.73e-09	U	NO
Churc1	357.796	1.44341	9.9e-07	U	NO
Cib1	142.783	1.4401	2.4e-11	U	NO
Gm37607	33.6669	1.44006	0.00268168	U	NO
Gm6293	20.0186	1.43942	0.00224275	U	NO
Gm9247	88.8349	1.43896	3.54e-07	U	NO
Ndufa11	1310.24	1.43804	8.13e-16	U	NO
Tpbgl	121.778	1.43779	2.38e-05	U	NO
Gm12751	257.455	1.4376	1.44e-06	U	NO
Atp5l2-ps	75.8282	1.43656	7.3e-05	U	NO
Tuba1c	44.1783	1.43591	0.0106628	U	NO
Gm5276	39.7008	1.43576	0.0483006	U	NO
Pex7	333.998	1.43513	9.81e-19	U	NO
Atp6v1h	548.265	1.43453	5.12e-16	U	NO
Ndufb6	2405.18	1.43416	5.38e-09	U	NO
5031439G07Rik	489.856	1.43284	1.18e-18	U	NO
Ppdpf	66.5424	1.43208	2.21e-06	U	NO
Tm6sf1	161.776	1.43104	2.18e-15	U	NO
Aig1	153.166	1.4304	2.83e-12	U	NO
Ripply3	24.4186	1.4302	0.000168329	U	NO
Gm13181	36.5539	1.42804	0.00276371	U	NO
Armc1	456.616	1.42627	3.2e-12	U	NO
Rxrg	172.967	1.42425	5.76e-08	U	NO
Muc2	20.0858	1.42392	0.0313441	U	NO
Map2k2	242.589	1.42302	1.47e-09	U	NO
Sh2b2	2131.85	1.42296	0.00984466	U	NO
Nprl3	183.787	1.42294	2.34e-10	U	NO
Mecomos	11.5697	1.42283	0.0224961	U	NO
Rex1bd	147.166	1.41934	1.38e-08	U	NO
Minos1	3533.19	1.41892	4.64e-11	U	NO
Ndufa8	3160.3	1.41753	1.22e-18	U	NO
Szrd1	219.342	1.4166	1.39e-08	U	NO
0610025J13Rik	16.6351	1.41645	0.00164464	U	NO
Atp1a1	321.871	1.41645	4.61e-09	U	NO
Cxcl14	135.677	1.41552	0.00369294	U	NO
Ide	2315.72	1.41536	5.42e-06	U	NO
Gm45133	26.387	1.41456	8.3e-05	U	NO
Ndufs8	2733.07	1.41423	9.98e-16	U	NO
Iba57	55.1917	1.41372	1.26e-08	U	NO
Gm15770	40.6019	1.41295	3.32e-06	U	NO
Gm1833	23.2966	1.4126	0.010777	U	NO
St7l	139.277	1.41064	2.91e-20	U	NO
Abca7	62.6864	1.41053	2.9e-07	U	NO
Adamts9	299.394	1.41039	2.49e-11	U	NO
Gnas	32246.7	1.40961	1.09e-12	U	NO
Emc8	299.976	1.40839	1.57e-22	U	NO
Commd9	80.7941	1.4082	3.08e-07	U	NO
2410015M20Rik	285.324	1.40755	7.45e-12	U	NO
Col4a2	4055.88	1.40573	1.02e-08	U	NO
0610012G03Rik	1400.82	1.40561	6.16e-27	U	NO
Abtb2	59.8381	1.40544	1.45e-05	U	NO
Gm4735	23.1739	1.40471	0.00981947	U	NO
2210016F16Rik	233.032	1.40393	3.61e-17	U	NO
Miga2	568.329	1.40373	3.99e-13	U	NO
Ccdc125	34.642	1.40367	0.000616794	U	NO
Tarbp2	16.0672	1.403	0.0116125	U	NO
Cyb5b	2450.36	1.40267	1.86e-09	U	NO
B4galt5	64.6633	1.40176	1.63e-05	U	NO
Timm17a	1355.89	1.39891	7.1e-19	U	NO
Hspa4	701.104	1.3965	4.59e-23	U	NO
Nsun4	306.141	1.39508	2.19e-16	U	NO
Dtnbp1	862.776	1.39462	8.02e-10	U	NO
Cox17	384.762	1.39457	2.26e-08	U	NO
Gm27252	18.7515	1.39425	0.00994389	U	NO
Dph3	498.855	1.39416	1.51e-26	U	NO
Cpm	79.0857	1.39383	5.41e-08	U	NO
Polr2l	69.584	1.38742	2.04e-09	U	NO
Rab1b	1707.4	1.38738	1.1e-09	U	NO
Ptpa	311.47	1.38731	2.78e-05	U	NO
Phb2	1447.76	1.38699	1.29e-17	U	NO
Gm3375	49.3292	1.38668	2.19e-06	U	NO
Clptm1	643.097	1.3866	3.23e-09	U	NO
Coq7	725.188	1.38609	5.41e-14	U	NO
Fgd4	134.117	1.38465	3.95e-06	U	NO
C1qtnf12	181.194	1.38415	1.55e-09	U	NO
I830077J02Rik	11.8949	1.38346	0.019237	U	NO
Tex264	581.945	1.38242	1.29e-10	U	NO
Tbc1d22b	138.1	1.38231	1.56e-08	U	NO
Ciao2a	530.738	1.38105	1.22e-17	U	NO
Vwa8	2595.39	1.38088	2.43e-13	U	NO
Smim20	580.663	1.37954	9.07e-10	U	NO
Gm5626	85.529	1.3791	6.09e-06	U	NO
Narfl	178.057	1.37909	2.72e-12	U	NO
Hsd17b4	1750.71	1.37816	1.24e-18	U	NO
Fam120aos	490.131	1.3781	7.21e-15	U	NO
5033403F01Rik	10.5212	1.37738	0.0149991	U	NO
Rtel1	100.584	1.37698	1.42e-09	U	NO
2022-03-05	1767.28	1.37646	6.19e-15	U	NO
Cd320	155.937	1.37645	8.97e-17	U	NO
mt-Nd1	1.20188e+06	1.3764	2.97e-08	U	NO
Tent5c	37.6292	1.37508	0.000533594	U	NO
Acyp2	622.433	1.37507	3.94e-09	U	NO
Adgrg3	14.0494	1.37084	0.00483729	U	NO
C030006K11Rik	551.127	1.36981	2.57e-14	U	NO
Tmem266	22.0854	1.36958	0.00640448	U	NO
Pgam1	51.4121	1.36907	3.51e-06	U	NO
Swsap1	81.4026	1.36799	2.2e-07	U	NO
Cntnap1	446.536	1.36748	1.54e-06	U	NO
N6amt1	159.017	1.36741	8.05e-10	U	NO
Mydgf	135.918	1.36698	7.31e-07	U	NO
Zfp672	529.639	1.36688	1.76e-11	U	NO
Alyref2	11.3338	1.36588	0.0113117	U	NO
Otub2	18.8016	1.36494	0.00274266	U	NO
Ube2m	561.196	1.36472	4.71e-06	U	NO
Ss18l2	402.436	1.35989	3.53e-09	U	NO
Gm36371	25.5286	1.35954	0.00186174	U	NO
Mrpl34	1387.54	1.35947	6.08e-14	U	NO
Cenpn	16.9835	1.35887	0.0103561	U	NO
Apoc1	10528	1.35866	6.42e-12	U	NO
Ptrh1	15.0932	1.35731	0.0082616	U	NO
Cox6b1	7786.47	1.35701	5.91e-09	U	NO
Ralgapb	564.612	1.3568	3.51e-37	U	NO
Ap1m1	465.719	1.35577	2.47e-08	U	NO
Gm16399	81.7367	1.35545	0.0257925	U	NO
Ptprr	11.7332	1.35515	0.0362242	U	NO
Miip	93.9764	1.35484	4.22e-09	U	NO
Tesk1	478.526	1.35474	3.37e-13	U	NO
Gm30173	16.5825	1.35322	0.00341292	U	NO
Gm5514	515.738	1.35224	5.04e-06	U	NO
Armt1	341.545	1.3512	2.5e-23	U	NO
Elob	314.611	1.35027	1.48e-13	U	NO
Gm1840	3037.43	1.3498	2.24e-10	U	NO
Slc7a10	63.5412	1.34851	0.020576	U	NO
Apex1	200.917	1.34568	3.64e-12	U	NO
Aldoart2	154.481	1.34424	0.000133007	U	NO
Ap5s1	236.247	1.34382	2.41e-10	U	NO
Pex19	2613.59	1.34364	5.67e-28	U	NO
Sco1	125.04	1.34311	1.08e-07	U	NO
Lrrc59	1615.74	1.34281	7.68e-15	U	NO
Aldh1l1	231.04	1.34185	1.18e-07	U	NO
Gm8242	147.13	1.34182	2.85e-09	U	NO
Eef1akmt4	32.124	1.33972	0.000261936	U	NO
Ldah	525.614	1.33907	2.86e-15	U	NO
Lipt1	192.663	1.33896	2.32e-05	U	NO
Yars2	266.142	1.33727	5.59e-09	U	NO
Aspa	646.792	1.33682	4.2e-12	U	NO
Lmna	186.865	1.33581	0.000165817	U	NO
Wrap73	20.7701	1.33527	0.00104717	U	NO
Sar1b	1711	1.33481	9.22e-07	U	NO
Gm7251	15.5083	1.33466	0.041835	U	NO
Gadd45gip1	346.014	1.33431	1.61e-12	U	NO
Gm48067	2132.33	1.3343	2.43e-06	U	NO
Usp33	364.954	1.33299	1.01e-09	U	NO
Gm14719	28.6103	1.33274	0.00832992	U	NO
Lss	267.864	1.33212	1.27e-07	U	NO
Gm6277	59.7989	1.33193	3.23e-07	U	NO
Pgm1	2771.91	1.3316	1.84e-14	U	NO
Mapkap1	273.671	1.33033	7.89e-13	U	NO
Mrm3	52.2302	1.32931	4.1e-07	U	NO
Gm7180	398.762	1.32925	2.93e-07	U	NO
Dpp7	82.7036	1.32891	7.76e-09	U	NO
Trmu	53.8805	1.32847	4.48e-06	U	NO
Chchd2	1557.1	1.32691	5.36e-24	U	NO
Psmc3ip	10.3118	1.32681	0.0345102	U	NO
Pank1	2871.71	1.3251	2.66e-06	U	NO
Mrps34	563.129	1.32446	8.49e-15	U	NO
Parvb	114.649	1.32202	2.08e-05	U	NO
Rap1gap	112.328	1.32182	0.000500725	U	NO
Gm29718	18.6513	1.32145	0.00469284	U	NO
Ciao2b	320.405	1.31995	3.86e-14	U	NO
Ei24	1232.81	1.31956	1.01e-21	U	NO
Tulp4	191.951	1.31868	4.79e-18	U	NO
Coa6	193.237	1.31589	7.46e-09	U	NO
Mrto4	37.6722	1.31521	0.000339904	U	NO
Fxn	59.2316	1.31512	8.86e-07	U	NO
Tmem9b	576.771	1.31497	5.07e-19	U	NO
Tmem177	151.124	1.31464	1.12e-12	U	NO
BC025920	36.9684	1.31463	0.000288186	U	NO
Cidea	7883.96	1.31413	1.51e-07	U	NO
Gm14539	1539.34	1.31407	1.5e-05	U	NO
E030030I06Rik	21.1806	1.31277	0.0216154	U	NO
Podxl	440.103	1.31164	1.35e-16	U	NO
Gm17823	1047.6	1.31155	0.000492692	U	NO
B9d2	70.5162	1.31008	6.72e-06	U	NO
Fkbp2	409.916	1.3095	1.41e-13	U	NO
Bloc1s4	73.9274	1.30916	3.53e-05	U	NO
Mrpl19	247.569	1.30877	1.57e-12	U	NO
Pla2g7	641.545	1.30829	2.51e-13	U	NO
Krt79	12.1291	1.30787	0.0351376	U	NO
Ecsit	535.124	1.30552	4.25e-10	U	NO
Mthfd2	30.202	1.30523	0.0143988	U	NO
Mrpl55	606.505	1.30465	4.71e-14	U	NO
Rpl36a-ps3	59.382	1.30425	4.56e-07	U	NO
Pcsk7	123.64	1.30283	1.54e-09	U	NO
Pomgnt1	273.57	1.30127	2.27e-07	U	NO
4921536K21Rik	15.6967	1.30115	0.0129059	U	NO
Xrcc3	63.5093	1.30081	8.8e-06	U	NO
Fbxl22	10.1604	1.29987	0.0382283	U	NO
Atp6v1f	393.497	1.29925	9.18e-12	U	NO
Gm11814	18.202	1.29733	0.0171263	U	NO
Itgae	32.1901	1.29731	0.000307108	U	NO
Hsp25-ps1	264.861	1.29661	0.00139839	U	NO
Gm36816	29.229	1.29585	0.00178701	U	NO
Rgs12	35.5919	1.29535	0.000561507	U	NO
Mpc1	166.371	1.29499	3.86e-09	U	NO
Fitm2	1437.17	1.29473	1.33e-21	U	NO
Prdm16	139.084	1.29461	9.86e-12	U	NO
Nudt14	40.5401	1.29458	9.28e-05	U	NO
Uxt	55.1391	1.29412	0.00433432	U	NO
Gm8055	58.0213	1.29379	0.0129632	U	NO
Uqcrh	6653.86	1.29273	4.93e-26	U	NO
AI413582	44.6402	1.29267	1.1e-05	U	NO
Nedd8	483.566	1.29255	3.15e-10	U	NO
Tmem53	345.844	1.29219	1.51e-08	U	NO
Acad9	143.089	1.29137	5.37e-15	U	NO
Rragc	2372.57	1.29108	3.75e-26	U	NO
Gm6374	14.5012	1.29075	0.013979	U	NO
Gm9774	402.951	1.29048	1.6e-09	U	NO
Ndufaf8	106.882	1.28866	2.37e-06	U	NO
Ypel1	16.8136	1.28841	0.0162109	U	NO
Acss1	1222.43	1.28834	5.2e-16	U	NO
Ap1s1	228.633	1.2881	1.6e-07	U	NO
Grrp1	29.1407	1.288	0.000473916	U	NO
Naa38	492.391	1.28745	2.86e-19	U	NO
Ppm1g	285.923	1.28619	5.92e-09	U	NO
Smad7	105.164	1.2859	0.000774823	U	NO
Gm42418	21871.4	1.28571	2.99e-05	U	NO
Cpsf4	53.1363	1.28557	3.65e-06	U	NO
Kmt5a	770.967	1.28544	5.64e-13	U	NO
Xpnpep1	243.803	1.28473	4.08e-18	U	NO
Kdm8	14.5383	1.28397	0.0183606	U	NO
Arfgef2	550.98	1.28295	4.93e-15	U	NO
Wipi2	583.152	1.28018	2.73e-05	U	NO
S100a13	1422.49	1.27982	7.8e-16	U	NO
Gm43668	20.2282	1.27981	0.0222721	U	NO
Ilvbl	63.5138	1.27694	4.92e-06	U	NO
Zfp961	185.171	1.27668	6.14e-09	U	NO
Bet1	211.36	1.27635	2.1e-08	U	NO
Timm44	673.734	1.27552	1.54e-20	U	NO
Vdac2	2478.52	1.27418	4.02e-09	U	NO
Gm6304	74.8155	1.27403	1.96e-06	U	NO
Taf6l	18.8509	1.27083	0.0126503	U	NO
5430425K12Rik	18.8325	1.27023	0.0376035	U	NO
Exoc3	287.807	1.26783	1.78e-17	U	NO
Syt14	17.7645	1.26781	0.0416996	U	NO
Gpc1	39.0155	1.2627	0.0442261	U	NO
Vac14	199.334	1.26221	2.44e-09	U	NO
Wwp2	75.3851	1.26099	6.4e-07	U	NO
Gm11964	516.803	1.26055	7.56e-16	U	NO
Serhl	81.106	1.26016	2.23e-09	U	NO
Pex6	329.541	1.26	1.81e-07	U	NO
Dip2a	276.028	1.25964	8.82e-13	U	NO
Camk2n2	48.139	1.25947	0.000914193	U	NO
Lpcat3	734.97	1.25827	3.74e-05	U	NO
Rpl7l1	458.839	1.25826	1.2e-08	U	NO
Twnk	148.568	1.25826	2.24e-11	U	NO
Emc4	345.937	1.25824	2.37e-19	U	NO
Chst8	28.7256	1.25795	0.0378392	U	NO
Commd3	722.496	1.25762	2.49e-17	U	NO
Pde4d	541.768	1.25755	0.0253114	U	NO
Zfp106	650.367	1.25699	1.55e-07	U	NO
Bola3	1377.9	1.25556	6.34e-10	U	NO
Commd2	69.4694	1.25493	7.27e-08	U	NO
Mrpl37	728.98	1.25489	2.56e-13	U	NO
Ppp2ca	2644.21	1.25482	1.25e-07	U	NO
Tmem69	462.661	1.25416	1.14e-08	U	NO
Prickle1	136.433	1.25059	1.27e-07	U	NO
Piezo1	267.596	1.24942	0.000624083	U	NO
Fis1	190.61	1.24936	7.4e-08	U	NO
D9Wsu149	62.7083	1.24929	0.000549608	U	NO
6530402F18Rik	24.9912	1.24892	0.00111008	U	NO
Plxna2	334.805	1.2488	3.04e-18	U	NO
Metrnl	17.5148	1.24803	0.0178301	U	NO
Elavl1	878.079	1.24729	1.39e-16	U	NO
Pqlc2	32.1872	1.24622	0.00236951	U	NO
3000002C10Rik	17.0482	1.24393	0.0192977	U	NO
Uqcrq	10494	1.24296	2.54e-07	U	NO
Pycrl	129.872	1.24093	0.000251412	U	NO
Xkr6	26.3603	1.23985	0.000813557	U	NO
P4ha2	58.5652	1.23972	0.00017843	U	NO
Psma3	84.6528	1.2391	6.62e-08	U	NO
Gm35638	511.099	1.23863	3.84e-05	U	NO
Hmbs	51.1295	1.23824	0.00416635	U	NO
Sephs2	1499.83	1.23792	9.14e-07	U	NO
Mrrf	187.068	1.23764	1.16e-12	U	NO
Mettl25	19.7584	1.23755	0.00967058	U	NO
Cdipt	460.509	1.23753	6.56e-11	U	NO
C230035I16Rik	20.9288	1.23691	0.00334532	U	NO
2900093K20Rik	34.1572	1.23678	0.00205514	U	NO
Pex5	553.572	1.23614	3.46e-07	U	NO
Mdh1	7966.89	1.23487	1.28e-15	U	NO
Cmah	15.351	1.23447	0.0165631	U	NO
4732440D04Rik	108.058	1.23438	1.4e-05	U	NO
Phf21b	18.0096	1.23309	0.00933062	U	NO
Fmo1	4514.69	1.23185	2.37e-08	U	NO
Wars2	106.245	1.23164	1.66e-08	U	NO
Magix	44.6459	1.23149	0.000536606	U	NO
Mbd3	279.594	1.23147	9.06e-12	U	NO
D17Wsu92e	539.351	1.22974	1.46e-13	U	NO
Pkp4	494.703	1.22907	6.03e-15	U	NO
Pgam1-ps2	47.2454	1.22895	0.00499414	U	NO
Scp2	603.003	1.22858	0.000359597	U	NO
Romo1	330.656	1.22854	2.22e-10	U	NO
Uqcrh-ps2	318.39	1.22781	7.58e-10	U	NO
Mllt1	204.678	1.2268	0.000170493	U	NO
Nubp2	274.117	1.22637	4.98e-12	U	NO
Cct3	285.024	1.22623	3.02e-10	U	NO
Clpp	1345.9	1.22559	2.43e-18	U	NO
1810019D21Rik	19.481	1.22546	0.00569898	U	NO
Fam234b	52.1172	1.22539	1.4e-05	U	NO
Timm50	422.285	1.22531	2.96e-10	U	NO
Gm44421	21.5993	1.22527	0.0171069	U	NO
Mief2	117.044	1.2246	7.89e-06	U	NO
Otud6b	210.739	1.22439	8.05e-07	U	NO
Tubb6	109.936	1.22282	0.0183756	U	NO
Gja5	23.5697	1.22221	0.00469284	U	NO
Shtn1	108.596	1.22189	1.48e-06	U	NO
Tefm	128.444	1.22186	1.53e-08	U	NO
B3gat3	90.6696	1.22115	1.74e-05	U	NO
Lzic	95.7145	1.22037	0.000307555	U	NO
AC117239.2	590.356	1.21965	1.37e-07	U	NO
Gm8523	24.5309	1.21779	0.001535	U	NO
BC003965	460.575	1.2173	1.03e-13	U	NO
Usp40	280.558	1.21717	5.63e-15	U	NO
Slc46a1	84.4209	1.21696	1.43e-05	U	NO
1700021F05Rik	358.698	1.21658	3.73e-12	U	NO
2210406O10Rik	29.8642	1.21617	0.00313664	U	NO
Oplah	447.056	1.2161	8.27e-11	U	NO
Ccl8	17.2862	1.21587	0.0112801	U	NO
Adamts5	155.93	1.21456	5.28e-06	U	NO
2310011J03Rik	140.329	1.21446	3.16e-05	U	NO
Tfdp1	141.836	1.21351	4.16e-09	U	NO
Sdr39u1	975.775	1.21294	5.05e-10	U	NO
Slc6a6	1591.53	1.21221	3.48e-09	U	NO
Rnf126	198.316	1.21092	1.76e-07	U	NO
Mlec	699.994	1.21012	1.31e-09	U	NO
Zfp787	104.505	1.2099	6.38e-07	U	NO
Tpst2	238.242	1.20966	1.05e-10	U	NO
Lars2	1077.01	1.2082	0.000239202	U	NO
Txndc12	1141.99	1.20757	1.28e-17	U	NO
Gm12416	26.7292	1.20671	0.0353346	U	NO
1700086O06Rik	75.813	1.20619	1.43e-06	U	NO
Afg3l1	160.436	1.20555	7.4e-08	U	NO
Eif4e2	479.398	1.20515	2.82e-18	U	NO
Tmem70	972.793	1.20482	1.52e-06	U	NO
Gm16373	30.3772	1.20424	0.00280421	U	NO
Alox12	23.8481	1.20415	0.00426911	U	NO
Slc35a4	612.179	1.20337	6.29e-08	U	NO
Edf1	310.329	1.20129	2.29e-11	U	NO
Gm46379	212.252	1.19988	7.95e-12	U	NO
Cln8	139.389	1.19942	5.43e-09	U	NO
Exosc5	87.4234	1.19939	0.00114484	U	NO
Yipf3	268.307	1.1979	8.77e-08	U	NO
Mab21l2	191.771	1.19604	2.08e-05	U	NO
Uqcrc2	3864.4	1.19533	1.78e-07	U	NO
Ghitm	9427.07	1.19503	8.07e-12	U	NO
Bud31	421.043	1.19469	1.67e-16	U	NO
Brap	426.456	1.19458	1.44e-15	U	NO
Gys1	1809.98	1.19381	2.59e-12	U	NO
Ndufs4	1121.99	1.19377	5.57e-08	U	NO
Dus2	32.0387	1.19303	0.000765762	U	NO
Eefsec	50.898	1.19299	1.54e-06	U	NO
Ttf2	58.2928	1.19214	1.61e-05	U	NO
Ccl27a	11.716	1.19204	0.046938	U	NO
Rnf5	497.722	1.19165	1.27e-10	U	NO
Polr1e	42.7697	1.19128	2.32e-05	U	NO
Gm45187	121.006	1.1908	1.95e-06	U	NO
Dolk	600.112	1.19066	1.82e-05	U	NO
Atp6v0d1	797.094	1.19055	7.44e-13	U	NO
Lrrfip2	257.955	1.19034	1.16e-10	U	NO
Hspa9	3575.25	1.19028	4.09e-14	U	NO
Ndufaf2	133.382	1.18979	4.73e-05	U	NO
Mtif3	146.204	1.18968	4.26e-11	U	NO
Mylk	438.283	1.18963	4.83e-15	U	NO
Pctp	181.57	1.18959	4.76e-08	U	NO
Calhm2	16.2338	1.18916	0.0370286	U	NO
Ltbp4	510.643	1.18872	1.02e-05	U	NO
Cactin	74.1316	1.18857	0.000604475	U	NO
Arhgef11	504.669	1.18826	6.18e-09	U	NO
Mprip	1115.34	1.18765	1.05e-16	U	NO
Ldhb	1912.07	1.18592	9.39e-09	U	NO
Wars	455.719	1.18545	1.19e-08	U	NO
Hras	227.633	1.18432	2.42e-09	U	NO
Comt	1165.66	1.18409	3.53e-06	U	NO
Mrpl51	662.388	1.18409	0.000590972	U	NO
Mrpl57	406.422	1.18401	1.15e-13	U	NO
Ube2d2a	228.719	1.18373	6.15e-09	U	NO
6430550D23Rik	43.4202	1.18331	2.17e-05	U	NO
Dtx4	68.7923	1.18329	0.00077772	U	NO
Smpd1	1129.58	1.18295	5.13e-09	U	NO
Dennd3	38.2239	1.18244	0.00130773	U	NO
Hipk2	112.029	1.18143	1.52e-07	U	NO
1600002K03Rik	16.9294	1.18106	0.0187957	U	NO
Otub1	277.974	1.18066	2.45e-13	U	NO
Glyctk	20.3367	1.18056	0.00317271	U	NO
Bola2	86.1152	1.17991	3.46e-06	U	NO
Bpgm	174.101	1.1798	3.69e-08	U	NO
Stk40	451.605	1.17947	0.000535851	U	NO
Nhp2	145.639	1.17925	1.11e-05	U	NO
Cluh	1776.98	1.17914	6.66e-13	U	NO
Mrps28	266.666	1.17904	2.69e-10	U	NO
1700123O20Rik	263.743	1.17868	1.96e-10	U	NO
Ndrg3	1862.48	1.17863	2.52e-11	U	NO
Vldlr	1234.5	1.1783	1.92e-07	U	NO
Cnpy2	791.231	1.17654	8.24e-21	U	NO
Slc1a1	44.1498	1.17469	0.00428689	U	NO
Clip1	534.327	1.17442	8.09e-07	U	NO
2310068J16Rik	20.2545	1.17416	0.00663521	U	NO
Slc22a15	160.433	1.17383	4.57e-07	U	NO
Osbpl9	1181.12	1.17371	1.09e-10	U	NO
Gm26944	28.5404	1.17366	0.00622073	U	NO
Eif2b4	210.392	1.17242	1.12e-09	U	NO
Gaa	340.034	1.17231	2.3e-05	U	NO
Ndufa3	4253.4	1.17206	2.39e-12	U	NO
Rnpep	201.064	1.17168	1.3e-07	U	NO
Gm5776	65.4193	1.17141	2.34e-05	U	NO
Cox16	53.4924	1.1714	9.22e-05	U	NO
Rnf10	1265.42	1.17106	6.17e-16	U	NO
Ube2l3	800.046	1.17076	8.24e-12	U	NO
Mvk	50.8601	1.16973	0.00120791	U	NO
Usp8	811.512	1.16891	2.18e-15	U	NO
Smim24	23.8175	1.16828	0.0197885	U	NO
Gm4335	37.7349	1.16756	0.0328652	U	NO
Slc31a1	483.386	1.16645	1.03e-09	U	NO
Scp2-ps2	516.448	1.16619	3.56e-06	U	NO
C130074G19Rik	298.035	1.16601	1.21e-05	U	NO
Susd2	26.5417	1.16593	0.0108067	U	NO
Psmc2	494.617	1.16579	3.07e-08	U	NO
Tgoln1	3278.92	1.16533	4.59e-08	U	NO
Gab2	88.7258	1.16526	2.47e-07	U	NO
Gm11598	143.97	1.16436	7.12e-07	U	NO
Tm7sf2	64.1749	1.16344	7.42e-06	U	NO
Plekhm2	92.902	1.16301	3.08e-05	U	NO
Alkbh2	36.8652	1.16299	0.000765762	U	NO
Nop2	220.139	1.16294	0.000149334	U	NO
Ndufv2	4012.23	1.16255	9.23e-13	U	NO
Pfdn6	52.2916	1.16243	0.000124767	U	NO
Syngr1	171.594	1.1621	1.85e-09	U	NO
Hint1	1226.37	1.16201	2.61e-09	U	NO
Nectin2	546.814	1.16198	8.1e-06	U	NO
Vamp8	476.86	1.16105	1.08e-14	U	NO
Gm6123	2305.01	1.16074	0.000270013	U	NO
B230311B06Rik	10.7817	1.16006	0.027531	U	NO
Gm10762	41.9579	1.15891	0.000876711	U	NO
Zfp771	59.387	1.15742	0.0111385	U	NO
Klc2	163.687	1.15723	1.67e-05	U	NO
Bpnt1	591.355	1.15721	5.5e-15	U	NO
Chid1	127.235	1.15721	4.18e-08	U	NO
Als2cl	143.906	1.15651	6.98e-06	U	NO
Zfp428	11.6026	1.15635	0.0332551	U	NO
Nhlrc1	42.3215	1.15531	0.0111811	U	NO
Mrpl1	160.224	1.15488	2.01e-05	U	NO
Sap30	10.4651	1.15368	0.0303767	U	NO
Plpp6	783.812	1.15302	1.82e-15	U	NO
G3bp2	1089.02	1.15259	4.33e-14	U	NO
Tpi1	1257.91	1.15241	3.48e-08	U	NO
Fbxw5	517.173	1.15199	1.67e-12	U	NO
Ahsa1	104.062	1.15198	5.9e-07	U	NO
Cidec	6598.19	1.15155	3.84e-08	U	NO
Car13	398.172	1.15114	3.56e-08	U	NO
Ptcd1	218.929	1.15025	8.86e-08	U	NO
Tada2b	384.918	1.14944	2.74e-07	U	NO
Gpn2	63.5088	1.1488	0.000173447	U	NO
Slc16a10	335.399	1.14873	6.31e-05	U	NO
Ak6	94.5046	1.14861	6.25e-08	U	NO
Zdhhc7	208.319	1.14761	4.18e-07	U	NO
Chrac1	144.845	1.1476	6.48e-06	U	NO
Tmem11	521.807	1.14589	2.28e-09	U	NO
Gnb5	190.573	1.14543	2.29e-13	U	NO
Zfp407	75.1664	1.14497	4.03e-06	U	NO
Gm2199	841.339	1.14379	2.83e-06	U	NO
Mmachc	1400.94	1.14379	6.52e-06	U	NO
Mettl16	90.6456	1.14373	2.89e-06	U	NO
Lgmn	253.972	1.14272	5.44e-09	U	NO
Decr1	2874.26	1.14157	7.76e-08	U	NO
Naa30	453.952	1.13972	8.24e-07	U	NO
Cenpb	676.827	1.13918	2.16e-09	U	NO
Selenof	2972.11	1.13892	3.41e-10	U	NO
Lyrm4	176.328	1.13847	2.39e-08	U	NO
Gm11273	5971.79	1.13789	2.19e-06	U	NO
Nfs1	339.648	1.13762	1.48e-10	U	NO
Adipor2	4981.38	1.13719	8.2e-07	U	NO
Mecr	1224.22	1.13629	6.5e-11	U	NO
Atp5e	4727.93	1.1361	9.74e-16	U	NO
Stx18	302.971	1.13512	2.25e-16	U	NO
Twf1	509.215	1.13431	1.09e-16	U	NO
Fdx1	291.477	1.13358	2.69e-08	U	NO
Hspe1	1160.46	1.13275	8.33e-11	U	NO
Def8	112.76	1.13242	2.65e-08	U	NO
Ndufb7	2291.2	1.13222	4.21e-19	U	NO
Zfp219	137.082	1.13143	2.11e-06	U	NO
Nfil3	89.9198	1.13128	0.0336926	U	NO
Fam210a	1756.49	1.13085	2.99e-10	U	NO
Mrpl4	223.444	1.13073	7.21e-06	U	NO
Kdr	1187.44	1.12954	7.89e-13	U	NO
Snx15	135.591	1.12904	1.1e-07	U	NO
Abhd17a	262.299	1.12818	1.17e-06	U	NO
Ykt6	290.772	1.12792	3.53e-10	U	NO
Foxred1	483.66	1.12764	3.33e-07	U	NO
Aste1	123.434	1.12667	9.48e-08	U	NO
Tubg1	131.226	1.12635	1.23e-06	U	NO
Ippk	64.3056	1.12557	1.21e-06	U	NO
Ndufc1	1487.84	1.12542	2.45e-09	U	NO
Txnrd1	710.801	1.12514	1.29e-09	U	NO
Mdh2	4362.41	1.1239	9.95e-09	U	NO
Cuta	471.875	1.12343	2.67e-06	U	NO
Rtca	222.336	1.12295	3.19e-11	U	NO
Commd4	198.432	1.12225	1.29e-08	U	NO
Tfam	459.991	1.1222	1.17e-08	U	NO
Rsl24d1	75.173	1.12159	0.000119187	U	NO
Polr2f	97.6938	1.12105	0.00139839	U	NO
Acbd6	104.168	1.12072	3.1e-07	U	NO
Sacm1l	721.427	1.12072	1.35e-08	U	NO
Acot4	216.639	1.12024	0.0123595	U	NO
Hdc	44.2829	1.12005	0.00173752	U	NO
Nabp1	2162.19	1.11897	0.00020776	U	NO
Mrps12	294.13	1.11867	4.9e-08	U	NO
Abcb7	217.441	1.11735	2.83e-05	U	NO
Grpel2	149.594	1.11725	3.79e-08	U	NO
Slc35c2	51.5785	1.11707	0.00311796	U	NO
P4ha1	262.609	1.11698	0.000209592	U	NO
Uqcr11	2072.14	1.11695	2.47e-06	U	NO
Mrpl3	666.472	1.11675	9.35e-16	U	NO
Ndufb8	2538.1	1.11646	7.07e-09	U	NO
Cdk2ap2	589.151	1.11571	8.73e-07	U	NO
Uck1	295.075	1.1155	0.00263715	U	NO
Pnp	381.921	1.11537	9.87e-05	U	NO
Oxsm	172.751	1.11526	3.85e-05	U	NO
Thbd	345.545	1.11508	1.47e-06	U	NO
Mapkapk2	966.63	1.11423	2.87e-08	U	NO
Khdrbs3	490.238	1.11414	3.38e-05	U	NO
Dnajc19-ps	302.311	1.11358	1.21e-06	U	NO
Tst	188.435	1.11353	0.000128661	U	NO
Adrb3	1156.02	1.11341	0.00146561	U	NO
Acaca	1574.36	1.11304	0.00149189	U	NO
D330023K18Rik	69.6478	1.11302	4.83e-05	U	NO
Il4ra	47.8147	1.11181	0.0023285	U	NO
Arl6ip4	174.742	1.11089	1.49e-10	U	NO
Adpgk	218.329	1.11079	2.18e-09	U	NO
Isca1	1921.18	1.11042	1.11e-07	U	NO
Immp1l	152.696	1.1092	0.000552947	U	NO
Gm37981	64.8299	1.10855	0.00089775	U	NO
Gm10327	20.3287	1.10854	0.0472611	U	NO
Gm6788	23.8447	1.10807	0.010374	U	NO
Gtpbp8	182.643	1.10712	3.82e-11	U	NO
Neurl4	171.656	1.10605	2.16e-06	U	NO
Gm5617	268.419	1.10585	1.32e-06	U	NO
Ran	214.563	1.10577	0.000379371	U	NO
Dhx58	44.5509	1.10564	0.000866417	U	NO
Strip1	301.021	1.10469	1.83e-05	U	NO
Pdss2	184.946	1.10393	1.29e-08	U	NO
Acox1	5257.4	1.10391	2.77e-10	U	NO
Pigyl	142.775	1.10363	4.84e-06	U	NO
Tiam2	18.0898	1.1034	0.0247937	U	NO
Gm16286	568.865	1.10337	3.94e-05	U	NO
Sdhd	3707.57	1.10301	5.92e-09	U	NO
Oxa1l	1332.91	1.10293	2.45e-13	U	NO
Tmbim4	701.944	1.10281	8.6e-13	U	NO
Asna1	450.704	1.1025	4.87e-07	U	NO
Mrpl21	150.962	1.10235	1.63e-05	U	NO
Cyc1	10994.7	1.10195	1.63e-10	U	NO
Psmb7	427.358	1.10188	5.89e-08	U	NO
Acvrl1	203.741	1.1018	2.34e-06	U	NO
Fabp4	56364.5	1.10176	8.6e-18	U	NO
Chkb	100.261	1.1017	0.000187801	U	NO
Mocs2	434.103	1.10122	4.05e-08	U	NO
Qpctl	77.0107	1.10072	4.61e-06	U	NO
Nfyc	110.798	1.10038	0.0104522	U	NO
St7	86.0382	1.10022	1.06e-05	U	NO
Gfm2	557.359	1.0997	7.93e-09	U	NO
Smco4	139.837	1.0996	0.000102401	U	NO
Pyurf	976.502	1.0996	2.64e-07	U	NO
Gm6581	1854.62	1.09943	3.58e-23	U	NO
Zfp513	101.075	1.0994	0.000156599	U	NO
Ndufa9	2343.22	1.09907	2.75e-16	U	NO
Erg28	74.9335	1.0987	5.4e-05	U	NO
Golm1	82.9313	1.09859	3.38e-05	U	NO
H2afj	100.443	1.09848	5.18e-05	U	NO
Mfsd3	57.8813	1.09811	0.000552245	U	NO
Tspan3	1232.78	1.09718	9.48e-14	U	NO
Prcc	236.455	1.09669	4.76e-07	U	NO
Vps33a	240.113	1.09621	2.09e-13	U	NO
Ubl7	491.283	1.09588	1.06e-08	U	NO
Myl9	714.15	1.09583	2.11e-09	U	NO
Ube2a	702.98	1.09538	3.26e-08	U	NO
Cryz	213.905	1.0943	3.13e-07	U	NO
Mpi	184.044	1.09293	1.48e-08	U	NO
Dcbld1	55.0309	1.09202	0.000396729	U	NO
Snrpb	316.726	1.09164	2.49e-05	U	NO
Zfand2b	52.2945	1.09112	0.00011227	U	NO
Gm5434	16.1369	1.09105	0.0273145	U	NO
Frat2	13.538	1.09098	0.0451947	U	NO
Gm9755	432.044	1.08956	2.09e-07	U	NO
Tmem250-ps	581.019	1.08954	1.36e-08	U	NO
Borcs5	137.601	1.08906	1.35e-08	U	NO
mt-Nd2	354776	1.08895	0.00113437	U	NO
Gja1	1189.13	1.08839	2.03e-09	U	NO
Lactb2	884.022	1.0882	0.00205556	U	NO
Trpm3	12.991	1.08754	0.0449582	U	NO
Pisd	83.9212	1.08741	1.12e-06	U	NO
Sh3bgrl2	157.535	1.08727	3.52e-07	U	NO
Mta3	204.924	1.08719	4.2e-08	U	NO
Reep6	338.813	1.08716	0.000492465	U	NO
Swi5	729.655	1.08712	3.41e-13	U	NO
Pin1	68.7953	1.08678	0.000370743	U	NO
Gm13675	45.6421	1.08536	0.00268833	U	NO
Pgap3	16.342	1.08492	0.0286174	U	NO
Slc26a10	52.2165	1.08422	0.00137801	U	NO
AC169506.3	33.3668	1.08392	0.00890394	U	NO
Heatr1	78.1362	1.0838	0.00174995	U	NO
Cox7c	132.929	1.08378	2.76e-10	U	NO
Rce1	99.9174	1.08264	2.16e-05	U	NO
Saysd1	73.2526	1.08153	1.13e-05	U	NO
Rbp4	928.635	1.08142	0.010632	U	NO
Parm1	3712.47	1.08078	4.87e-06	U	NO
Gbe1	2678.45	1.07947	0.00012195	U	NO
Mrps17	1469.2	1.07904	6.64e-21	U	NO
Ifi30	213.862	1.07884	3.52e-10	U	NO
Cat	6082.85	1.07821	1.26e-08	U	NO
Szt2	120.792	1.07769	0.0004891	U	NO
Eif2b2	97.3806	1.07566	1.38e-05	U	NO
Eef1e1	300.688	1.07521	3.06e-11	U	NO
Psmd10	89.3536	1.07504	2.84e-05	U	NO
Gm15920	3095.72	1.07494	2.46e-06	U	NO
Fmc1	1161.46	1.07472	5.32e-08	U	NO
Lbhd1	51.9137	1.07408	0.000151432	U	NO
Dnajc15	1082.69	1.07376	2.28e-08	U	NO
Galt	240.422	1.0725	4.61e-10	U	NO
Acot2	985.937	1.0716	7.93e-05	U	NO
Api5	387.069	1.07033	1.99e-10	U	NO
Isy1	103.188	1.07026	1.44e-08	U	NO
Cyyr1	394.348	1.07022	8.83e-05	U	NO
Grsf1	2224.02	1.06998	3.41e-13	U	NO
Ufc1	455.529	1.0698	9.35e-11	U	NO
Slc25a5	1618.23	1.06898	6.31e-07	U	NO
1110065P20Rik	125.951	1.06707	1.74e-05	U	NO
Cd99l2	558.254	1.06666	1.88e-09	U	NO
Ttc30b	218.961	1.06612	4.31e-05	U	NO
Shroom1	24.8877	1.06569	0.0336926	U	NO
Tbc1d7	139.369	1.0652	1.37e-06	U	NO
Slc25a3	6390.86	1.06303	3.74e-09	U	NO
Trib1	613.065	1.06293	0.00252049	U	NO
Ccdc107	93.7726	1.06291	2.86e-05	U	NO
Dnajb11	427.066	1.06255	4.46e-12	U	NO
Hoxc5	235.719	1.0625	0.00083217	U	NO
Acta2	1062.66	1.06245	3.88e-06	U	NO
Ttc32	96.9824	1.062	0.000218788	U	NO
Aes	1661.97	1.06146	1.02e-06	U	NO
Tubb2a	36.481	1.06144	0.00624062	U	NO
AI506816	41.5963	1.06097	0.0111952	U	NO
Akirin1	97.3866	1.05976	0.0006547	U	NO
Dpm3	285.695	1.05966	4.76e-07	U	NO
Gmeb1	52.7186	1.05887	0.000347591	U	NO
Spg7	509.243	1.05758	5.4e-09	U	NO
Pcbd2	216.163	1.056	6.55e-06	U	NO
Uba3	244.057	1.05561	3.03e-05	U	NO
Mcat	189.689	1.05561	9.17e-10	U	NO
Coq5	639.398	1.0555	6.23e-19	U	NO
BC031181	498.521	1.05535	6.63e-12	U	NO
Nfia	2264.84	1.05506	2.5e-21	U	NO
Ndufa5	1353.43	1.0546	4e-08	U	NO
Retsat	945.944	1.05313	3.42e-07	U	NO
Cxadr	670.755	1.0511	3.1e-06	U	NO
Prkcsh	375.757	1.05024	4.06e-08	U	NO
Mif4gd	745.445	1.04932	3.63e-05	U	NO
Prkrip1	50.1509	1.04574	0.00298545	U	NO
Sigmar1	291.579	1.04452	6.2e-08	U	NO
Hacl1	242.958	1.04436	1.45e-05	U	NO
Mrps7	999.082	1.04407	3.39e-22	U	NO
Suds3	404.943	1.0436	8.36e-06	U	NO
Stambpl1	36.0117	1.04336	0.00848507	U	NO
Inpp5a	594.826	1.04279	5.94e-14	U	NO
Dag1	1803.88	1.04276	2.39e-08	U	NO
Hira	66.4971	1.04121	0.000210492	U	NO
Ptges3	240.883	1.04113	2.86e-09	U	NO
Tars2	171.078	1.04092	6.07e-06	U	NO
Slc38a10	477.29	1.04089	0.000334307	U	NO
Kctd2	232.286	1.04055	4.42e-05	U	NO
Odc1	144.917	1.04044	4.85e-08	U	NO
Mrpl38	827.005	1.04012	7.94e-08	U	NO
Arhgap19	41.9046	1.03943	0.00818705	U	NO
Mrpl44	265.196	1.03839	2.14e-07	U	NO
Abi3	57.5261	1.03815	0.00280062	U	NO
Tmem56	104.581	1.03764	0.00404734	U	NO
Tomm20	160.134	1.03763	2.62e-06	U	NO
Ncoa4	34.6858	1.03757	0.0263609	U	NO
Apobr	20.3392	1.03733	0.0308184	U	NO
Znhit2	94.2581	1.0373	3.64e-06	U	NO
Sugt1	413.46	1.03686	3.98e-05	U	NO
Gm5436	4167.64	1.03674	3.14e-05	U	NO
Cebpg	574.992	1.03609	2.66e-11	U	NO
Ccdc122	34.5472	1.03555	0.00439255	U	NO
Mrpl48	123.997	1.03452	1.92e-07	U	NO
1190005I06Rik	83.0588	1.0339	0.001176	U	NO
Abhd11	430.382	1.03321	9.43e-08	U	NO
Fam234a	889.863	1.0332	7.63e-06	U	NO
Bloc1s3	34.7093	1.03314	0.00833514	U	NO
Etfrf1	2665.86	1.03237	2.21e-05	U	NO
Gm7868	30.0665	1.03173	0.0110084	U	NO
Lamtor4	289.104	1.0306	2.35e-10	U	NO
Mrpl17	798.501	1.03045	5.93e-11	U	NO
Ankrd40	1923.06	1.03028	1.64e-17	U	NO
Denr	184.082	1.02985	0.000206799	U	NO
Pdgfb	534.694	1.02979	0.00626712	U	NO
Gsk3a	644.117	1.02957	3.92e-05	U	NO
Rmnd5b	138.586	1.02929	7.3e-05	U	NO
Tmbim6	4668.35	1.02895	4.84e-17	U	NO
BC002163	3222.07	1.02884	3.92e-13	U	NO
Sod3	3450.59	1.0288	4.98e-05	U	NO
Slc25a11	1767.4	1.02857	7.4e-11	U	NO
Fbxo33	127.629	1.02734	5.96e-05	U	NO
Kcp	74.9795	1.02728	0.0220134	U	NO
Fbxo6	165.614	1.02675	3.79e-05	U	NO
Mrpl28	612.076	1.02671	5.77e-08	U	NO
Mrps36-ps2	40.1687	1.02633	0.00139775	U	NO
Cyhr1	644.978	1.02624	8.72e-15	U	NO
Mbnl1	1458.76	1.02619	4.23e-08	U	NO
Snrnp35	27.4615	1.0258	0.00492712	U	NO
Klhdc10	337.723	1.0254	9e-08	U	NO
Mlf2	1374.88	1.02493	3.49e-07	U	NO
Zfand6	1271.41	1.0246	3.13e-07	U	NO
Acot9	186.633	1.02376	2.53e-07	U	NO
Ppp2r1b	696.501	1.02317	0.00281362	U	NO
Gm7666	130.225	1.02301	0.000255983	U	NO
Dlst	4139.95	1.02247	1.53e-07	U	NO
Lyrm9	104.541	1.02236	5.93e-05	U	NO
Bcap31	1620.43	1.02182	1.08e-17	U	NO
Pofut2	514.605	1.02174	1.56e-05	U	NO
Dusp3	520.958	1.02146	2.09e-07	U	NO
Alkbh6	210.729	1.02131	0.00252049	U	NO
Saraf	582.18	1.02044	1.89e-16	U	NO
Aldh3b2	57.1152	1.02044	0.00281753	U	NO
Sirt5	131.186	1.02043	7.17e-05	U	NO
Taf13	187.114	1.02012	0.00340035	U	NO
Ankrd54	47.2066	1.02002	0.00534483	U	NO
Atp5k	835.511	1.01978	0.00286864	U	NO
Slirp	415.376	1.01955	0.0010544	U	NO
Gm15510	21.0561	1.01927	0.0295856	U	NO
Fam57a	47.8905	1.0183	0.00053546	U	NO
Dhrs4	454.015	1.01778	2.54e-10	U	NO
4632404H12Rik	71.2042	1.01771	3.26e-05	U	NO
Pde12	120.962	1.01767	0.000118437	U	NO
Sdsl	28.666	1.01757	0.0106632	U	NO
Tm4sf1	287.82	1.01747	6.13e-06	U	NO
Minpp1	91.3224	1.01569	1.93e-06	U	NO
Abhd10	261.166	1.01552	3.57e-09	U	NO
Mrfap1	394.902	1.0153	0.0130188	U	NO
Ms4a6d	18.79	1.01523	0.0158074	U	NO
Apbb1	21.2173	1.01492	0.0255295	U	NO
Gm8121	192.236	1.01492	2.24e-05	U	NO
Emc7	993.05	1.01463	4.76e-08	U	NO
Ebna1bp2	160.384	1.01456	1.42e-07	U	NO
Gm8930	20.0151	1.01447	0.0191121	U	NO
Gm45053	28.3037	1.01442	0.0180505	U	NO
Gm6419	590.252	1.01406	2.32e-05	U	NO
Atp5f1	4769.18	1.01307	1.79e-05	U	NO
Bzw1	1049.65	1.01298	3.77e-08	U	NO
Psmb3	309.503	1.01294	0.00361592	U	NO
Nabp2	546.803	1.01263	6.74e-06	U	NO
Sgsm3	32.1528	1.01247	0.00536875	U	NO
Echdc1	2030.65	1.01117	0.00652466	U	NO
Slc25a32	322.107	1.01051	1.25e-06	U	NO
2410022M11Rik	34.5853	1.00917	0.0104721	U	NO
Tmem238	26.3195	1.00865	0.0116437	U	NO
Gadd45g	284.507	1.008	0.000872441	U	NO
Rpn1	245.932	1.00769	8.97e-08	U	NO
Kctd10	447.271	1.00757	5.62e-06	U	NO
Elp5	481.139	1.00717	1.07e-08	U	NO
Ndufb4	872.344	1.00708	5.11e-10	U	NO
Cox4i1	14790.5	1.00527	1.61e-07	U	NO
Tomm70a	735.636	1.00452	2.5e-08	U	NO
Clptm1l	499.914	1.00405	5.18e-06	U	NO
Sptlc1	325.471	1.00393	3.43e-09	U	NO
Ube2n	178.472	1.00392	4.89e-07	U	NO
Adgre5	445.762	1.00343	5.66e-07	U	NO
Gm9899	257.107	1.00272	0.00140856	U	NO
Rap1gap2	31.2278	1.00264	0.00927277	U	NO
Kctd1	237.293	1.00247	3.52e-07	U	NO
Afg3l2	780.972	1.00203	1.14e-11	U	NO
Nacc1	133.357	1.00162	0.000589519	U	NO
Ube2j2	103.774	1.00142	8.02e-05	U	NO
Ggact	120.539	1.00077	3.65e-08	U	NO
Fbxw4	109.672	1.00046	0.0189859	U	NO
Lonp1	425.014	0.999958	2.49e-06	U	NO
AC132307.1	28.5931	0.999953	0.0103393	U	NO
Gm12115	81.6221	0.999922	0.000390158	U	NO
Stxbp2	190.358	0.999826	5.97e-06	U	NO
Nf2	574.767	0.999527	9.06e-08	U	NO
Stub1	356.829	0.999333	6.15e-07	U	NO
Arl2	195.424	0.99891	1.73e-06	U	NO
Rbpms2	1406.05	0.998875	8.02e-10	U	NO
Ppp1r3c	468.8	0.998668	0.00755396	U	NO
Atp5j2	2469.38	0.998384	8.16e-11	U	NO
Ttc1	294.591	0.998336	1.52e-08	U	NO
L3hypdh	272.378	0.997861	6.68e-06	U	NO
Cc2d1b	92.6338	0.996267	4.99e-05	U	NO
Galnt18	56.0098	0.996042	0.00254542	U	NO
Rad23a	608.463	0.995677	2.22e-05	U	NO
Gemin7	350.448	0.995646	2.36e-05	U	NO
Urgcp	367.406	0.995485	8.16e-06	U	NO
Ears2	49.7369	0.995359	0.00104874	U	NO
Ttc4	147.336	0.994896	3.33e-07	U	NO
Ccdc124	244.665	0.994626	7.56e-06	U	NO
Tmem204	252.101	0.994384	0.000257538	U	NO
Coasy	303.652	0.994232	8.69e-06	U	NO
Ginm1	3340.19	0.994055	1.02e-14	U	NO
Txndc15	453.133	0.993979	1.13e-10	U	NO
Prkaca	5558.4	0.993689	8.78e-05	U	NO
Slc27a4	118.449	0.993128	5.66e-06	U	NO
Gm7099	105.514	0.992231	9.65e-05	U	NO
Car8	29.484	0.992221	0.00820746	U	NO
Jtb	267.692	0.992205	2.02e-10	U	NO
Glmp	431.179	0.99107	8.35e-07	U	NO
Rnf185	338.559	0.990505	1.15e-06	U	NO
Maip1	218.825	0.989991	1.71e-05	U	NO
Pxmp4	924.089	0.989601	1.05e-08	U	NO
Agpat5	240.388	0.989373	2e-05	U	NO
Med20	230	0.989179	2.83e-06	U	NO
Fkbp8	328.315	0.988868	3.13e-07	U	NO
Mrps14	530.454	0.988516	2.45e-11	U	NO
Pex13	771.582	0.98843	8.47e-08	U	NO
Ppp2r5b	138.085	0.988213	0.000694604	U	NO
Gm7936	135.859	0.988153	0.000843876	U	NO
Tmem219	132.5	0.988153	6.58e-06	U	NO
Hdhd2	811.165	0.987642	3.74e-09	U	NO
Dbt	1151.05	0.987561	0.000663833	U	NO
Sem1	658.927	0.987029	1.82e-07	U	NO
Asl	54.1804	0.986443	0.000460592	U	NO
Syn2	105.589	0.985667	0.00981085	U	NO
A730017L22Rik	32.973	0.98446	0.0217878	U	NO
Pcca	475.047	0.984347	5.76e-07	U	NO
Spns2	113.285	0.984071	0.000550324	U	NO
Prmt3	70.5767	0.983846	0.000408798	U	NO
Mus81	38.0158	0.983631	0.0103351	U	NO
Fbxo9	380.402	0.983041	7.95e-12	U	NO
Tomm40l	208.705	0.982767	1.48e-05	U	NO
Prkce	333.619	0.982031	9.88e-05	U	NO
B230322F03Rik	29.6702	0.981655	0.00755591	U	NO
Dctn3	216.519	0.981572	0.00228801	U	NO
Tmem135	1461.85	0.980463	2.46e-05	U	NO
Wdr12	50.7958	0.980279	0.0070465	U	NO
Gpr137	174.611	0.980214	0.000838142	U	NO
Eloc	1175.68	0.980114	0.000140644	U	NO
Ap2s1	381.532	0.979486	7.25e-07	U	NO
Gm11708	17.5014	0.978921	0.0485006	U	NO
Itfg2	98.7103	0.978786	1.76e-05	U	NO
Lpin2	92.3453	0.978664	1.83e-05	U	NO
1700008J07Rik	98.1015	0.978561	0.000252334	U	NO
Mark1	38.8708	0.978504	0.00122497	U	NO
Tatdn2	137.621	0.978364	0.000731994	U	NO
Rgs7	423.349	0.977971	4.72e-09	U	NO
Cops3	1063.8	0.977111	3.02e-08	U	NO
Acat1	4120.03	0.976879	1.61e-09	U	NO
Nqo1	31.6044	0.976432	0.0284371	U	NO
Rab8a	424.875	0.976422	8.28e-11	U	NO
Tmem79	992.421	0.976139	4.49e-05	U	NO
Dnlz	285.754	0.975388	9.49e-08	U	NO
Tmem106a	397.617	0.975188	0.000101782	U	NO
Arpp19	608.039	0.974553	6.41e-08	U	NO
Ankrd13a	551.336	0.973215	9.57e-09	U	NO
Col4a1	5408.01	0.972969	1.5e-06	U	NO
Lsm11	35.2279	0.972	0.00366554	U	NO
Ppp1r8	134.556	0.970927	1.48e-06	U	NO
Prdx1	1047.64	0.970681	5.41e-06	U	NO
Tusc1	110.943	0.970498	2.44e-05	U	NO
Ubac2	198.794	0.970059	3.58e-06	U	NO
Mrps21	241.944	0.96947	0.00193267	U	NO
Inafm1	237.26	0.969247	0.000116586	U	NO
Ap2a2	642.874	0.969216	4.76e-10	U	NO
Prmt7	119.154	0.969205	0.000104237	U	NO
Ttc7	60.192	0.969105	0.00519082	U	NO
Lrrc8b	73.4585	0.968767	0.000270536	U	NO
Naa25	220.09	0.968607	6.73e-06	U	NO
Ruvbl2	153.891	0.96855	3.13e-06	U	NO
Ndufb5	8191.37	0.968479	1.58e-08	U	NO
Tspan15	210.977	0.968364	6.23e-05	U	NO
Poc1a	70.4756	0.967346	0.000851744	U	NO
Mrps16	528.7	0.967216	3.71e-08	U	NO
Rps19bp1	79.9981	0.966993	0.000189342	U	NO
Kyat3	503.593	0.966318	1.37e-07	U	NO
Qdpr	877.574	0.966295	2.77e-10	U	NO
Spns1	64.3273	0.965383	0.00581017	U	NO
Nme6	44.7383	0.964852	0.0092334	U	NO
Gspt2	36.7013	0.964403	0.00986262	U	NO
Oaz1-ps	647.665	0.963981	0.000528862	U	NO
Ovca2	144.9	0.963841	1.82e-06	U	NO
Eif4e	215.857	0.963142	0.0217986	U	NO
Apba1	31.7092	0.96249	0.0235157	U	NO
Helz2	362.661	0.961221	0.00839443	U	NO
Gm13092	128.635	0.961178	0.000599529	U	NO
Sdhaf2	721.5	0.961072	4.15e-11	U	NO
Gm13127	55.9217	0.960481	0.00583474	U	NO
Gtf2h5	301.66	0.960323	4.62e-10	U	NO
Tedc2	28.1962	0.960262	0.00934955	U	NO
Ube2v2	103.556	0.960061	3.33e-05	U	NO
Nudt12	384.954	0.959575	0.000364663	U	NO
Plvap	46.8856	0.958536	0.0324575	U	NO
Gak	342.084	0.957134	5.96e-09	U	NO
Plaa	431.195	0.956829	6.09e-05	U	NO
Gm7859	299.836	0.956667	0.00155398	U	NO
Gm13612	40.3174	0.956417	0.00525806	U	NO
Nelfcd	174.565	0.955466	1.58e-06	U	NO
Psme3	875.008	0.955268	4.17e-08	U	NO
Apeh	125.906	0.954299	4.01e-06	U	NO
Lamtor5	411.297	0.953381	1.75e-09	U	NO
Hcfc1r1	1916.57	0.952963	3.56e-06	U	NO
Ppp2r5a	3260.51	0.952532	0.000272257	U	NO
Rbm45	48.0479	0.950749	0.00962742	U	NO
Tmem60	458.011	0.950606	0.000244166	U	NO
Gm43655	246.803	0.949789	1.46e-05	U	NO
Sec13	249.862	0.949573	2.26e-11	U	NO
Epas1	4210.3	0.94926	1.57e-14	U	NO
1500026H17Rik	53.7484	0.949252	0.00546266	U	NO
Elac2	210.287	0.949171	5.44e-06	U	NO
Ssu72	687.084	0.948756	1.74e-15	U	NO
Ppp4r1	129.024	0.94875	7.19e-07	U	NO
Mrpl14	670.806	0.94847	1.36e-09	U	NO
Dnaja4	325.391	0.948282	0.0119856	U	NO
Mast2	445.052	0.948155	4.13e-06	U	NO
Gm16089	625.832	0.947668	0.00583474	U	NO
Chuk	305.767	0.947568	9.87e-05	U	NO
Ifrd2	169.386	0.946206	3.15e-05	U	NO
Dld	2334.74	0.946027	1.6e-07	U	NO
Ciao1	234.649	0.945486	3.01e-09	U	NO
Cyp4b1	551.133	0.94298	0.00845535	U	NO
Gm6872	28.3904	0.94253	0.0161092	U	NO
Hoxc4	253.552	0.942153	0.000141645	U	NO
Grtp1	88.0268	0.941809	0.000909716	U	NO
Eipr1	44.7799	0.941454	0.00316814	U	NO
Impa1	451.927	0.940412	2.74e-07	U	NO
E2f4	187.494	0.940189	7.07e-06	U	NO
Cbr4	321.946	0.940189	0.000217972	U	NO
Gm4707	1285.51	0.939881	1.15e-06	U	NO
Snapc2	38.0217	0.939523	0.0217443	U	NO
Ndufb1-ps	2354.51	0.939506	6.33e-07	U	NO
Akt1s1	637.542	0.938841	0.000154849	U	NO
Cdca3	19.2687	0.938733	0.0296432	U	NO
Klhl26	219.56	0.938698	1.38e-06	U	NO
Lrrc8c	490.941	0.93862	0.000367392	U	NO
Tubb4a	29.0883	0.938512	0.0186116	U	NO
Snhg20	82.1266	0.938207	0.00193114	U	NO
Aifm1	408.436	0.937767	1.53e-05	U	NO
Gm12396	156.647	0.936689	0.000813275	U	NO
Trappc10	283.061	0.936304	1.45e-06	U	NO
Dclre1b	133.076	0.936204	2.15e-05	U	NO
Zdhhc23	55.0317	0.936052	0.00782693	U	NO
Chmp7	265.006	0.935937	5.51e-07	U	NO
Fbh1	439.301	0.93515	3.28e-06	U	NO
Coq9	2158.34	0.934859	7.34e-11	U	NO
Tma7-ps	90.5135	0.934678	0.000127168	U	NO
Rab3ip	228.419	0.934664	4.68e-06	U	NO
Surf4	976.765	0.934062	1.38e-10	U	NO
Tbc1d13	201.43	0.933638	0.00012679	U	NO
Mrpl11	372.805	0.933541	5.99e-12	U	NO
Ndufs6b	602.34	0.93285	9.67e-08	U	NO
Metap1	235.824	0.9325	4.8e-10	U	NO
Ndufv1	2131.33	0.931106	1.34e-08	U	NO
Slc35b1	429.855	0.930613	3.9e-07	U	NO
Actl6a	86.6814	0.930099	0.000210045	U	NO
Taf2	483.917	0.929601	7.27e-07	U	NO
Gm6851	25.1724	0.929126	0.0233743	U	NO
2022-03-02	763.825	0.928472	7.27e-12	U	NO
Necap2	271.231	0.92836	2e-06	U	NO
Aurkaip1	1379.65	0.927595	1.97e-14	U	NO
Mrps24	909.295	0.927308	2.2e-08	U	NO
Cln5	290.945	0.927247	2.49e-08	U	NO
Wdr4	74.2464	0.927004	0.000150656	U	NO
Mcts1	334.726	0.925977	9.51e-05	U	NO
Naxd	169.489	0.925859	5.43e-09	U	NO
Spats2	141.02	0.925842	4.81e-06	U	NO
Ssbp1	57.43	0.925818	0.0045999	U	NO
Nars2	113.135	0.925654	2.24e-06	U	NO
4933431E20Rik	29.9526	0.925184	0.0117095	U	NO
Gm11407	216.136	0.924893	0.00349534	U	NO
Aldh16a1	46.6049	0.924724	0.00200249	U	NO
Gtpbp3	76.1207	0.924172	0.00254542	U	NO
Zfp91	1259.26	0.923841	8.95e-06	U	NO
Atp6v1c1	372.233	0.923759	3.27e-10	U	NO
Atp13a1	226.477	0.923348	0.000463198	U	NO
Dbi	16201.2	0.922976	0.000322674	U	NO
Atp9b	234.417	0.92235	8.95e-05	U	NO
Dctn5	543.483	0.922155	5.7e-05	U	NO
Gm6444	759.22	0.921767	0.000988845	U	NO
Ndufv3	3543.14	0.921271	7.91e-12	U	NO
Mrgbp	123.711	0.920832	0.000300012	U	NO
Gm6997	43.6735	0.920809	0.00800491	U	NO
Synj2bp	181.932	0.920363	1.13e-06	U	NO
Abcb8	249.8	0.919858	0.00013478	U	NO
Eif5a	429.826	0.919788	2.59e-10	U	NO
Gm16418	198.496	0.919739	0.00241072	U	NO
Tmem242	875.053	0.919368	1.91e-09	U	NO
Mrps36-ps1	466.317	0.919133	4.72e-08	U	NO
Tspan31	745.758	0.919074	7.46e-08	U	NO
Nudt6	180.612	0.918933	1.24e-06	U	NO
Sys1	240.596	0.918653	2e-07	U	NO
Gbf1	280.974	0.918238	8.44e-06	U	NO
Rftn1	68.2332	0.91812	0.00135699	U	NO
Ndufa1	2685.87	0.917901	2.66e-10	U	NO
Commd1	143.232	0.917757	0.000133776	U	NO
Psmb2	1479.76	0.917355	1.44e-09	U	NO
Gm11633	1966.08	0.916592	6.49e-08	U	NO
Map3k7	601.003	0.916542	7.69e-14	U	NO
Mrpl45	643.151	0.916099	1.26e-10	U	NO
Zdhhc5	582.945	0.916038	6.25e-05	U	NO
Gid8	346.433	0.915813	2.94e-08	U	NO
Mcf2l	164.748	0.914907	0.000631912	U	NO
Tmem33	709.942	0.914873	1.2e-05	U	NO
Slc30a9	586.66	0.914672	5.96e-11	U	NO
Actr10	405.061	0.91453	1.38e-11	U	NO
2210408F21Rik	48.7471	0.913738	0.0015357	U	NO
Clybl	1451.39	0.912702	3.26e-10	U	NO
[truncated: 3,394 more rows]

## Sheet: Cold response in BATKO
Gene	Basemean	log2FC at cold	adjpval	Status at cold	TH direct target gene?
2010003K11Rik	171.968	2.18259	1.38e-09	U	YES
2300009A05Rik	663.072	0.730323	0.00271471	U	YES
Aatk	51.7035	1.22149	0.000846337	U	YES
Abcd3	2430.76	1.81224	5.08e-24	U	YES
Abhd6	133.769	1.3703	9.18e-19	U	YES
Acaa1b	22.3184	2.06475	1.18e-05	U	YES
Ackr3	654.225	1.90056	6.34e-11	U	YES
Acot11	1811.51	2.57689	1.4e-07	U	YES
Acot8	47.7183	1.80845	1.75e-09	U	YES
Acsf2	238.04	0.808973	0.0065699	U	YES
Acsl5	1598.14	3.17874	1.19e-35	U	YES
Adamtsl4	23.2821	-1.04664	0.0455414	D	YES
Adcy10	24.9273	2.19203	0.000316781	U	YES
Adcy3	2687.49	2.45016	9.59e-24	U	YES
Adrb2	485.462	-3.76686	2.77e-13	D	YES
Adtrp	880.448	2.04844	6.07e-17	U	YES
Agtrap	113.921	-0.795756	0.000442431	D	YES
Alpl	307.821	1.27224	1.46e-06	U	YES
Ampd2	210.572	-1.27251	2.24e-07	D	YES
Ampd3	747.245	-0.631932	0.000255838	D	YES
Angptl2	882.178	-1.30772	8.51e-11	D	YES
Ankrd9	458.688	2.53056	1.31e-11	U	YES
Aoc3	4214.26	-1.30639	2.01e-10	D	YES
Aph1b	107.57	-0.743946	0.00129275	D	YES
Apln	36.173	-1.86483	4.34e-05	D	YES
Apoe	3259.86	-1.76677	1.53e-14	D	YES
Arc	89.6971	-3.30936	3.71e-06	D	YES
Arhgef19	15.0229	1.97006	0.0105305	U	YES
Aspg	523.84	2.68865	1.09e-22	U	YES
Atl2	1017.8	0.776114	0.00895743	U	YES
Atp2a2	3443.54	0.804679	3.97e-05	U	YES
Atxn1	159.986	-0.71467	0.000115018	D	YES
Aven	67.8961	1.03578	6.74e-06	U	YES
Axin2	95.077	0.814338	0.0396759	U	YES
Bcl3	230.679	0.930604	0.0414503	U	YES
Bmp8b	324.078	3.46429	4.52e-11	U	YES
Brd3	211.735	0.618057	8.17e-05	U	YES
Btf3l4	119.558	0.694806	0.00258948	U	YES
Cbfb	252.877	-0.955387	0.000326743	D	YES
Cdc42ep2	206.579	-0.742895	0.0181735	D	YES
Cend1	109.049	4.20587	2.49e-22	U	YES
Cep85	91.995	-0.624124	0.012171	D	YES
Cgnl1	838.243	-0.868642	7.58e-06	D	YES
Cgrrf1	433.025	1.0892	2.6e-08	U	YES
Chd3	199.785	1.2427	4.49e-06	U	YES
Cnnm2	533.275	2.32376	5.45e-34	U	YES
Cntfr	133.877	-1.74669	0.0113151	D	YES
Coa7	160.87	1.05321	2.31e-09	U	YES
Col27a1	1386.46	-0.702466	0.010453	D	YES
Coq10b	631.627	0.836486	0.0323415	U	YES
Cpn2	376.513	1.37537	4.8e-09	U	YES
Cry2	364.399	-0.702272	0.00682526	D	YES
Ctif	146.997	-1.0682	5.7e-06	D	YES
Ctnnal1	28.9545	-0.918263	0.0247345	D	YES
Cux1	710.575	0.937345	4.96e-09	U	YES
Cyp2b10	648.091	5.02261	2.79e-10	U	YES
D5Ertd579e	503.187	0.97481	9.04e-13	U	YES
Dbp	867.341	-1.47837	1.41e-07	D	YES
Ddit3	346.849	-0.603843	0.000475597	D	YES
Ddr1	20.35	-1.22907	0.00432396	D	YES
Ddt	1971.55	0.991171	1.42e-18	U	YES
Ddx39	137.422	1.02909	4.27e-09	U	YES
Dhrs7	1184.92	0.729812	0.00791736	U	YES
Dlat	6483.42	1.09012	2.63e-06	U	YES
Dnaja3	2181.34	0.971035	3.46e-11	U	YES
Dpep1	191.356	0.821703	0.00234141	U	YES
Dph2	26.9148	0.863346	0.0334636	U	YES
Dusp14	17.5138	1.73121	0.0012681	U	YES
Dysf	176.221	0.933376	2.45e-06	U	YES
Egln1	2365.89	0.763612	1.26e-06	U	YES
Eif4e3	1069.76	0.614735	0.00188278	U	YES
Eln	105.418	1.23723	9.82e-05	U	YES
Elof1	623.788	1.09402	2.54e-06	U	YES
Engase	21.2107	1.12491	0.0172166	U	YES
Eno1	1760.94	1.42714	7.43e-08	U	YES
Erbb3	70.6821	-0.843859	0.00706905	D	YES
Ergic1	1265.53	0.7057	0.000311715	U	YES
Esr1	323.924	-1.17185	7.29e-08	D	YES
Ezh1	245.958	-1.06375	1.71e-08	D	YES
Fah	242.71	1.0507	3.7e-05	U	YES
Fam69b	80.8824	0.700472	0.0332617	U	YES
Fastk	534.767	0.961814	1.81e-07	U	YES
Fbxl2	21.1802	1.24411	0.00707099	U	YES
Fbxo31	287.198	-1.08506	1.66e-08	D	YES
Fdft1	323.326	-1.01704	0.000129063	D	YES
Fgfrl1	485.807	-1.06051	3.42e-08	D	YES
Fosl2	406.085	-1.1361	0.0014174	D	YES
Fzd4	2865.84	-0.686004	9.25e-08	D	YES
G6pdx	2242.94	0.87372	4.77e-06	U	YES
Gapdh	151.836	1.6258	1.3e-07	U	YES
Gbp3	98.2258	-0.862223	0.00754975	D	YES
Gde1	2696.33	1.0032	5.65e-08	U	YES
Ghdc	78.665	0.683679	0.00575831	U	YES
Glrx5	988.378	0.714997	4.05e-05	U	YES
Gm826	69.308	3.59151	2.2e-30	U	YES
Gmps	368.786	1.27633	4.94e-07	U	YES
Gpam	2470.81	1.65687	6.4e-26	U	YES
Gpat4	2543.19	0.911405	1.81e-11	U	YES
Gpd2	8569.09	0.966646	0.00102544	U	YES
Gpi1	1742.47	0.873202	0.0139724	U	YES
Gpr4	332.747	-0.935174	0.0109465	D	YES
Grn	1485.84	0.626065	0.00584731	U	YES
Gsap	12.9295	-1.22707	0.0268196	D	YES
Gstt3	107.01	-1.45367	1.78e-08	D	YES
Gtf2ird1	88.0156	0.909515	0.0043582	U	YES
H13	379.483	0.736104	0.000233927	U	YES
Hccs	902.889	1.14622	1.16e-08	U	YES
Hdgfl2	96.1208	-0.980737	3.61e-05	D	YES
Heg1	673.234	-0.712555	3.65e-05	D	YES
Hes1	376.981	-2.21525	6.56e-10	D	YES
Higd1a	207.491	1.68229	2.44e-16	U	YES
Hilpda	32.2503	-1.20791	0.00301899	D	YES
Hk2	2460.64	1.7753	4e-07	U	YES
Hlf	659.305	-0.613133	0.0024413	D	YES
Hpdl	90.287	0.950929	0.00012043	U	YES
Hr	51.2997	-2.20037	0.006066	D	YES
Hrh2	55.312	0.672695	0.0219169	U	YES
Hsph1	178.599	1.43433	0.0149509	U	YES
Id2	227.555	-0.737055	0.00501076	D	YES
Idh3a	23703.8	0.928814	1.24e-10	U	YES
Igfbp3	244.365	1.50353	1.98e-06	U	YES
Il15	45.8972	-1.29735	0.000120771	D	YES
Il2ra	31.8847	-0.956028	0.00714305	D	YES
Irf1	133.691	-0.620838	0.0220817	D	YES
Irf2bpl	110.015	-0.659583	0.0118811	D	YES
Itpr2	1462.58	-1.09044	4.39e-20	D	YES
Jarid2	181.407	-1.01055	2.88e-11	D	YES
Kansl2	30.8851	0.684652	0.0211912	U	YES
Kdm6b	323.265	-0.798995	0.0258587	D	YES
Kng2	474.939	-0.937872	0.00125421	D	YES
Lep	173.803	-3.04176	1.63e-18	D	YES
Letm1	1871.5	1.96933	6.85e-38	U	YES
Letmd1	7627.99	1.37036	1.44e-14	U	YES
Lgr6	609.833	2.64623	8.2e-27	U	YES
Loxl1	326.901	2.34642	6.82e-21	U	YES
Lrfn3	40.8041	1.74162	7.09e-07	U	YES
Lrrc8d	382.277	1.29746	8.37e-09	U	YES
Lsp1	47.9853	-0.800408	0.0381484	D	YES
Map2k5	77.1791	0.635199	0.00283025	U	YES
Mapre3	433.731	1.01915	1.55e-07	U	YES
Mcee	1026.2	0.740219	0.000885001	U	YES
Mcrip2	1117.89	1.04124	9.87e-07	U	YES
Megf9	745.274	1.13373	3.81e-06	U	YES
Mid1ip1	469.39	1.06386	3.44e-05	U	YES
Midn	781.209	-0.868902	0.000308845	D	YES
Mpv17l2	380.505	1.09215	3.74e-09	U	YES
Mrpl36	661.452	1.00839	1.51e-10	U	YES
Mrs2	689.909	1.1965	1.99e-16	U	YES
Msrb2	207.089	1.03746	2.39e-06	U	YES
Mtch2	1717.87	1.23742	2.32e-10	U	YES
Mturn	354.097	-2.48999	3.07e-35	D	YES
N4bp2l1	245.466	-0.802772	4.29e-06	D	YES
Naa20	51.8494	1.03376	0.00448266	U	YES
Nadk	2977.07	0.624087	1.8e-05	U	YES
Ndn	354.566	-1.62067	1.87e-13	D	YES
Nr1d1	2387.81	-0.912077	0.000938535	D	YES
Nr1d2	297.622	-0.616108	0.0338404	D	YES
Nrip2	28.3303	-1.45518	6.6e-05	D	YES
Ntsr2	15.7849	-1.44367	0.0217674	D	YES
Nudt7	1869.2	1.24309	4.92e-11	U	YES
Opa3	160.274	0.721823	0.00956197	U	YES
P2rx5	142.906	-0.673512	0.0233726	D	YES
Pank4	83.1402	-0.767928	0.00122435	D	YES
Paqr9	1131.97	2.33645	1.25e-27	U	YES
Pde4a	485.515	0.944803	0.00101817	U	YES
Pdhb	2298.23	1.37167	3.81e-07	U	YES
Per3	413.189	-0.626162	0.0144566	D	YES
Perm1	185.053	1.371	0.000915481	U	YES
Pgk1	354.053	1.24939	2.22e-09	U	YES
Phkg1	63.3805	-2.40263	0.0121558	D	YES
Pim3	806.598	-1.23721	4.62e-08	D	YES
Pkn1	1443.86	1.10103	4.05e-06	U	YES
Pla2g12a	1558.01	1.32751	4.92e-39	U	YES
Plbd1	1908.45	0.733058	3.03e-06	U	YES
Pld6	34.2514	1.11369	0.00605189	U	YES
Ppargc1a	513.939	1.18427	0.000458049	U	YES
Pqlc1	111.173	-1.57128	1.11e-08	D	YES
Prkab1	467.073	0.800025	0.000223889	U	YES
Prss36	83.4483	-0.979272	4.97e-06	D	YES
Psph	129.327	1.2957	6.99e-08	U	YES
Ptgds	91.4608	-2.19046	8.04e-06	D	YES
Ptpn11	549.837	0.609507	1.35e-08	U	YES
Pygl	1755.1	0.955854	0.00306107	U	YES
Qrsl1	160.809	0.906945	2.39e-08	U	YES
Rab34	262.575	-0.651599	0.0125506	D	YES
Rai1	121.695	-0.999445	1.69e-06	D	YES
Ralgds	121.422	-0.828322	0.00197648	D	YES
Rbck1	534.239	0.634103	0.00015457	U	YES
Rbm38	239.58	-2.27523	1.55e-16	D	YES
Rcn1	53.231	-0.674831	0.0358533	D	YES
Rhou	111.552	-0.869329	0.000531488	D	YES
Rhpn2	84.8992	-0.944502	0.00079124	D	YES
Rilp	232.752	0.693539	0.00181829	U	YES
Rom1	43.0458	1.26637	0.000334979	U	YES
Rpl13a	79.5393	1.32665	1.52e-05	U	YES
Rps6ka5	141.378	-1.00517	4.02e-07	D	YES
Rsad1	144.361	1.087	1.87e-12	U	YES
Sbk1	565.583	0.82074	0.00400062	U	YES
Sc5d	1050.45	1.27851	1.59e-10	U	YES
Scarb2	1302.45	1.00311	1.13e-14	U	YES
Sdhaf4	799.181	0.838945	1.43e-05	U	YES
Setd7	453.254	-0.766546	9.75e-06	D	YES
Sh3bp5	371.376	-0.872647	2.32e-05	D	YES
Shmt1	209.006	0.693243	0.0037149	U	YES
Slc1a5	6240.08	-1.22896	1.84e-10	D	YES
Slc22a4	26.8664	-1.90388	4.05e-06	D	YES
Slc25a15	108.894	0.867405	3.95e-07	U	YES
Slc25a22	1297.42	0.920184	7.32e-06	U	YES
Slc25a42	1827.57	0.861728	0.0286455	U	YES
Slc25a51	3187.58	1.45278	8.26e-12	U	YES
Slc26a6	47.9473	0.819134	0.00928187	U	YES
Slc27a2	1918.84	1.15462	6.48e-07	U	YES
Slc2a4	2661.36	0.687005	0.000700625	U	YES
Slc35e4	13.7054	-1.24195	0.00604624	D	YES
Slc35f6	322.442	0.765917	0.000381565	U	YES
Slc35g1	73.4883	2.33327	2.23e-13	U	YES
Slc8b1	47.2664	-0.96254	0.00931508	D	YES
Slco4a1	132.633	1.54525	0.000126886	U	YES
Smarcd1	600.994	1.07958	0.000549582	U	YES
Smarcd3	155.686	-1.45475	1.94e-16	D	YES
Snx10	821.285	1.18919	6.18e-07	U	YES
Snx21	200.289	-1.25807	7.43e-07	D	YES
Snx33	106.506	-0.611706	0.0257946	D	YES
Spsb1	268.286	0.636967	0.00543669	U	YES
Sssca1	126.155	0.738491	0.00899241	U	YES
Stab1	106.78	-0.96538	0.00058262	D	YES
Stk16	356.298	1.04725	2.87e-08	U	YES
Synj2	103.403	-0.610737	0.00110589	D	YES
Syt12	46.2532	1.22567	0.00705489	U	YES
Tacc2	153.783	-0.985263	0.00272986	D	YES
Tcn2	968.99	0.917067	0.00291637	U	YES
Tepsin	83.6126	0.75063	0.0138296	U	YES
Tgfbi	103.763	-0.648546	0.00968671	D	YES
Thrsp	20996.2	1.28896	4.21e-06	U	YES
Tinagl1	841.588	-1.08372	6.92e-05	D	YES
Tlcd2	96.1401	0.999167	0.00525586	U	YES
Tlr5	23.2047	-1.19632	0.00718725	D	YES
Tmem186	219.997	1.07963	9.73e-17	U	YES
Tmem63b	181.606	0.679519	0.00247326	U	YES
Tob2	2154.43	-0.667471	0.00280699	D	YES
Tomm40	120.941	1.18577	1.01e-09	U	YES
Traf4	550.855	0.758486	0.0072375	U	YES
Trak1	1125.27	0.70719	9.09e-06	U	YES
Trim3	174.705	-0.716661	7.81e-05	D	YES
Trp53inp1	192.678	-0.908012	0.0248268	D	YES
Trp53inp2	4179.84	1.33719	7.86e-15	U	YES
Tspan4	389.38	-2.97637	3.94e-27	D	YES
Tuba8	459.773	0.851734	0.000196068	U	YES
Tubb4b	345.967	1.70459	2.83e-22	U	YES
Txn2	6222.17	0.680717	0.00225615	U	YES
Ubiad1	253.174	1.11005	7.08e-09	U	YES
Ucp1	62887.4	3.42249	2.11e-16	U	YES
Ucp3	652.541	1.14352	0.043221	U	YES
Uhrf1bp1	159.6	0.901664	2.87e-10	U	YES
Uqcc2	125.433	0.636833	0.00642357	U	YES
Uqcrc1	2678.13	0.633066	0.00508034	U	YES
Xrcc6	1164.62	0.775815	4.96e-06	U	YES
Zc3h7b	268.323	-0.625519	1.59e-06	D	YES
Zfp691	127.852	0.605647	0.00154958	U	YES
Zfpm1	74.652	-0.990262	0.00971073	D	YES
Elovl3	3579.55	9.59502	1.22e-35	U	NO
Tacr2	21.7328	6.44364	1.06e-08	U	NO
Fam131c	21.3506	5.97166	9.59e-08	U	NO
Hephl1	54.0752	5.40145	4.41e-11	U	NO
ccdc198	11.8729	5.38216	1.84e-06	U	NO
Cyp1a1	41.8928	5.27906	1.66e-07	U	NO
Pla2g2e	24.6158	5.27006	1.27e-13	U	NO
Gm32591	11.1336	5.20008	6.25e-06	U	NO
Gm16062	119.97	5.14385	3.13e-43	U	NO
Gys2	692.904	5.1364	3.97e-114	U	NO
Hist1h1d	14.5711	4.87927	1.03e-06	U	NO
Gk	2501.93	4.81578	5.53e-56	U	NO
Acot1	106.146	4.79517	3.52e-10	U	NO
Gm34921	10.8806	4.61141	9.18e-07	U	NO
Dhrs9	367.758	4.50265	3.54e-06	U	NO
Gm15241	182.771	4.48879	4.44e-13	U	NO
Sgk2	80.6981	4.44487	2.93e-15	U	NO
Slc25a34	200.734	4.24829	7.31e-12	U	NO
4631405J19Rik	44.9104	4.2079	1.47e-06	U	NO
2310069B03Rik	329.656	4.06283	3.55e-15	U	NO
Mfsd2a	342.487	4.0443	0.000101915	U	NO
Fgf21	11.9094	3.92811	4.32e-07	U	NO
3930402G23Rik	51.6978	3.61568	5.51e-17	U	NO
Cpne5	83.6192	3.47457	0.0090206	U	NO
Adam12	1152.44	3.42757	7.52e-68	U	NO
Lrrc52	29.4073	3.35187	0.00338347	U	NO
Marc1	121.147	3.34164	4.39e-21	U	NO
Rasl10a	11.4635	3.28343	9.21e-08	U	NO
Chrna2	35.4698	3.23542	6.68e-14	U	NO
Dio2	1759.28	3.21159	0.00125506	U	NO
Arhgef37	44.4756	3.20641	1.07e-11	U	NO
St3gal5	243.367	3.1946	1.37e-07	U	NO
Hacd2	2141.12	3.12731	7.73e-55	U	NO
Mfsd4b3	46.8046	3.09903	3.06e-15	U	NO
Agpat2	20701	3.09538	3.25e-10	U	NO
Cxcl13	16.6634	3.07312	3.15e-05	U	NO
Olfr1396	47.5757	3.05999	5.55e-17	U	NO
Tectb	38.6652	3.05527	1.21e-13	U	NO
Sycp3	17.2858	3.00186	6.44e-06	U	NO
Actg2	26.2927	2.98726	0.00289255	U	NO
Hebp2	164.759	2.96232	5.06e-20	U	NO
Gm13610	20.0488	2.96103	2.83e-12	U	NO
Ttc25	242.764	2.94841	8.38e-05	U	NO
Apmap	1858.43	2.94173	1.57e-157	U	NO
Arhgdig	30.3307	2.86485	2.04e-09	U	NO
Gm42614	12.944	2.84958	0.000126	U	NO
Dnajc22	12.8738	2.83411	5.42e-06	U	NO
4930415O20Rik	30.6338	2.80542	2.44e-07	U	NO
Gm11520	11.423	2.78381	2.46e-07	U	NO
Gm15471	47.8464	2.77975	3.7e-10	U	NO
Gm36595	18.1784	2.77316	2.08e-05	U	NO
Gm45769	179.819	2.74614	6.52e-27	U	NO
Glis3	19.7081	2.69343	2.8e-06	U	NO
Prlr	21.3824	2.66424	2.35e-05	U	NO
AC132455.3	16.228	2.63597	0.000100531	U	NO
Cables1	200.77	2.63168	3.12e-26	U	NO
Angptl8	276.09	2.62504	1.62e-06	U	NO
Sorl1	579.965	2.6221	4.64e-15	U	NO
Gm7908	340.315	2.54862	9.75e-20	U	NO
Ctcflos	430.538	2.53518	4.68e-16	U	NO
Tmem82	17.325	2.53367	9.75e-06	U	NO
Ube2ql1	32.704	2.51447	1.72e-06	U	NO
Clstn3	743.583	2.51232	1.39e-15	U	NO
Sqle	218.188	2.49859	1.05e-25	U	NO
Gm45716	95.7507	2.49302	4.05e-21	U	NO
Muc2	20.0858	2.48126	7.97e-06	U	NO
Fhdc1	47.5564	2.47979	1.06e-07	U	NO
Rhod	17.4949	2.47614	9.75e-08	U	NO
Gm33699	13.5564	2.44889	8.29e-05	U	NO
Otop1	1387.65	2.44037	2.25e-27	U	NO
AC132307.5	31.2601	2.43351	2.87e-10	U	NO
Gm10851	96.6021	2.42735	1.76e-16	U	NO
Slc25a17	1140.01	2.41314	3.75e-48	U	NO
Nnmt	325.43	2.37679	3.88e-14	U	NO
Hsd17b12	3357.5	2.3567	2.41e-46	U	NO
Slc4a4	1555.65	2.31664	1.13e-20	U	NO
Utp14b	117.175	2.3038	3.78e-10	U	NO
Gm37397	18.4472	2.29199	1.52e-06	U	NO
Fbp1	29.4963	2.28805	3.36e-10	U	NO
Hist2h3c2	20.1691	2.27715	6.36e-09	U	NO
Tfr2	41.7189	2.25058	3.65e-05	U	NO
Dock8	442.286	2.24174	3.4e-18	U	NO
Rasl2-9	52.4652	2.24062	3.55e-09	U	NO
Gm5575	10.333	2.23621	0.00143263	U	NO
Scd2	2915.33	2.2348	2.29e-10	U	NO
Pgd	1829.81	2.23199	6.66e-16	U	NO
Gm26671	11.7423	2.22033	9.79e-06	U	NO
Tmed5	2951.19	2.21622	8.42e-17	U	NO
Ppil1	104.89	2.20001	1.23e-19	U	NO
Impa2	796.754	2.19747	7.08e-26	U	NO
Ddhd2	1638.71	2.18921	4.39e-21	U	NO
Gm4961	26.7747	2.18561	2.25e-08	U	NO
Fastkd5	54.8621	2.16946	1.54e-14	U	NO
Hsd17b7	229.497	2.15932	9.62e-26	U	NO
Mfsd4b1	91.2822	2.15487	2.07e-17	U	NO
Gm10638	22.4461	2.14946	9.92e-07	U	NO
Fbp2	376.024	2.14508	3.16e-18	U	NO
Pdss1	152.769	2.13914	2.89e-17	U	NO
Ffar4	491.038	2.12989	0.00151578	U	NO
Plin2	5174.25	2.12961	1e-11	U	NO
Gm10603	50.2935	2.12516	2.87e-10	U	NO
Slc43a2	441.499	2.11748	2.47e-22	U	NO
Fdps	16.9886	2.11441	7.49e-05	U	NO
Gmpr	2700.66	2.11245	0.000156564	U	NO
Cldn1	57.2534	2.08293	0.000143474	U	NO
B430010I23Rik	111.362	2.08037	1.13e-15	U	NO
Elovl6	9408.97	2.07962	5.34e-17	U	NO
Mrpl20	183.534	2.07424	2.13e-26	U	NO
Glrx	229.384	2.06668	2.44e-15	U	NO
E2f2	43.7689	2.05879	2.89e-10	U	NO
Rbm47	258.062	2.0553	2.92e-24	U	NO
Mcts2	350.314	2.03961	6.64e-24	U	NO
Smyd4	157.457	2.03821	5.86e-14	U	NO
Arntl	28.9711	2.03726	2.88e-06	U	NO
Tstd3	274.513	2.03431	2.94e-19	U	NO
Gm32389	14.6836	2.03218	0.000110018	U	NO
Ehhadh	1346.01	2.02877	0.000169676	U	NO
Tmem273	19.3813	2.01994	1.38e-07	U	NO
Tmem86b	38.6267	2.01722	2e-08	U	NO
Me1	2392.08	2.00954	1.74e-05	U	NO
Pfkp	601.233	2.00511	6.87e-26	U	NO
I830077J02Rik	11.8949	1.99764	0.000220847	U	NO
Gm7463	29.7146	1.99314	3.48e-05	U	NO
Krt10	45.099	1.97667	9.48e-11	U	NO
Cpm	79.0857	1.97642	7.18e-19	U	NO
Nsdhl	940.92	1.96134	5.4e-15	U	NO
Hist1h1c	328.97	1.9545	2.39e-10	U	NO
Pmepa1	2066.11	1.94474	0.0195287	U	NO
Abhd5	1254.54	1.94124	5.45e-34	U	NO
Gm7049	677.648	1.93891	0.000194256	U	NO
Mvd	32.9141	1.92929	6.99e-08	U	NO
Ndufaf4	603.964	1.92599	1.39e-21	U	NO
Oscar	12.3767	1.92396	0.00406821	U	NO
Hspb8	376.158	1.90241	0.000124411	U	NO
Ptk2b	332.601	1.89884	3.58e-19	U	NO
Acot2	985.937	1.88884	1.65e-16	U	NO
Mpc2	3897.13	1.88123	5.6e-21	U	NO
Gm13502	11.9977	1.87923	0.0033741	U	NO
Rilpl2	141.197	1.87866	2.16e-17	U	NO
Mterf2	113.467	1.87646	1.32e-12	U	NO
Thg1l	50.7542	1.87486	5.37e-13	U	NO
Noct	2147.91	1.87278	0.0332054	U	NO
1700037H04Rik	2147.13	1.86395	2.02e-16	U	NO
Vwa3a	122.121	1.85887	1.64e-14	U	NO
Acly	8468.8	1.85812	0.00101226	U	NO
Tmem120a	467.595	1.85453	2.59e-12	U	NO
Gm16470	12.9484	1.85145	2.1e-05	U	NO
A930017M01Rik	38.5647	1.84713	1.67e-09	U	NO
Gm26588	12.2777	1.84694	0.000104559	U	NO
Gm48940	10.0207	1.84663	0.0123684	U	NO
Gm3571	37.0362	1.84502	2.33e-05	U	NO
Gpd1	37875.2	1.8439	1.82e-11	U	NO
Hdhd3	60.6883	1.84069	1.26e-08	U	NO
Ncan	11.6091	1.83742	0.00422757	U	NO
Lars2	1077.01	1.83535	4.89e-11	U	NO
Abhd15	115.094	1.83441	2.85e-13	U	NO
Apoc3	40.7222	1.83219	4.62e-08	U	NO
Coq3	259.305	1.82622	8.7e-31	U	NO
Mrps22	262.446	1.82189	4.44e-13	U	NO
Mlycd	541.602	1.82186	1.49e-30	U	NO
Gale	51.0777	1.82135	7.17e-10	U	NO
Cyp4b1	551.133	1.8206	5.63e-10	U	NO
Gm45012	14.7253	1.81834	0.00167161	U	NO
Srxn1	392.668	1.81737	4.62e-30	U	NO
Frrs1	60.3666	1.81613	5.2e-15	U	NO
Lpl	56480.2	1.812	2.39e-21	U	NO
Ppp1r3b	2429.1	1.80991	8.44e-08	U	NO
Alas2	103.978	1.80778	2.86e-08	U	NO
Hapln4	49.3789	1.80183	1.57e-06	U	NO
Gm43672	260.373	1.80109	2.13e-22	U	NO
Comtd1	160.046	1.7977	2.17e-09	U	NO
Mrpl46	161.771	1.79338	6.21e-15	U	NO
Mpzl3	72.5447	1.78973	2.66e-14	U	NO
Nsun3	155.452	1.7794	1e-16	U	NO
Rpia	567.236	1.77343	5.13e-17	U	NO
Asf1b	62.0311	1.76696	1.14e-07	U	NO
Mkks	195.842	1.76139	5.29e-20	U	NO
Phf5a	225.036	1.76135	2.29e-16	U	NO
Gramd1b	178.731	1.75634	1.03e-07	U	NO
Ppif	1917.18	1.75365	7.08e-21	U	NO
Myrip	39.8874	1.74322	0.00104025	U	NO
Pde7b	132.677	1.74306	2.55e-06	U	NO
mt-Rnr2	270824	1.73906	8.78e-16	U	NO
Mmp19	177.4	1.73244	3.07e-21	U	NO
Slc39a2	24.4103	1.72787	3.77e-06	U	NO
AC122442.1	231.066	1.72655	2.73e-16	U	NO
Sptbn5	14.6938	1.7238	4.4e-05	U	NO
1700007L15Rik	31.1531	1.71468	1.52e-07	U	NO
Slc7a10	63.5412	1.71428	0.000543808	U	NO
Cyp51	410.499	1.7141	1.16e-25	U	NO
Pex16	163.628	1.71006	7.63e-13	U	NO
Myl6b	64.9833	1.7091	0.000253514	U	NO
Ppcs	97.6388	1.70817	1.62e-08	U	NO
Pafah2	462.978	1.70594	5.72e-43	U	NO
Cox11	309.997	1.70531	3.01e-12	U	NO
Neat1	3874.65	1.69218	3.74e-21	U	NO
Pcyt2	327.541	1.69017	3.96e-20	U	NO
Retsat	945.944	1.68851	1.01e-21	U	NO
Cars2	294.394	1.68713	1.34e-14	U	NO
Hbb-bs	5337.74	1.6868	3.65e-07	U	NO
Mrpl47	375.593	1.6857	3.18e-19	U	NO
Cox20b	211.559	1.6739	6.91e-12	U	NO
Shb	316.148	1.67071	1.06e-08	U	NO
Lipt1	192.663	1.66941	9.7e-10	U	NO
Gm6223	85.9762	1.66786	1.98e-10	U	NO
Cyb5b	2450.36	1.66772	2.11e-16	U	NO
Acsl1	18809.4	1.66718	4.19e-21	U	NO
Il1rn	29.2232	1.667	2.99e-05	U	NO
Lamtor1	182.753	1.66631	4.44e-17	U	NO
Manf	546.908	1.66579	3.06e-24	U	NO
Pgp	413.586	1.66313	1.61e-17	U	NO
1110008P14Rik	739.151	1.66151	1.87e-11	U	NO
Gm7556	14.3526	1.65823	0.0222195	U	NO
Gm6288	10.5104	1.65772	0.00498844	U	NO
Mrps2	1248.28	1.6577	2.07e-24	U	NO
Rmdn3	1300.64	1.65631	3.25e-17	U	NO
Gm42067	31.7978	1.65615	8.85e-05	U	NO
Pi16	21.7932	1.65135	0.0216299	U	NO
Poln	359.467	1.6449	9.01e-18	U	NO
Mpc1-ps	1176.15	1.64027	2.95e-14	U	NO
Lyve1	17.2574	1.63965	0.0108816	U	NO
Prelid3b	1421.45	1.63895	4.31e-17	U	NO
Pdhx	1059.8	1.63785	9.31e-29	U	NO
mt-Rnr1	214723	1.6365	3.39e-13	U	NO
Rapgef4	36.6365	1.63525	6.23e-06	U	NO
Fastkd2	170.72	1.63424	4.85e-12	U	NO
Coprs	22.9204	1.63306	1.6e-06	U	NO
Mir6236	13.0165	1.63275	0.00730947	U	NO
Zdhhc13	40.8012	1.63122	3.34e-06	U	NO
Hmgcs1	634.218	1.63004	4.02e-10	U	NO
Egln3	286.698	1.6293	8.25e-09	U	NO
Gm42418	21871.4	1.61663	1.3e-09	U	NO
Slc25a20	3632.72	1.61323	8.33e-24	U	NO
Fzd3	27.2324	1.61249	0.000372204	U	NO
Gm6277	59.7989	1.61132	8.88e-13	U	NO
Timm8b	1576.39	1.61121	2.28e-36	U	NO
Gm32817	337.899	1.60886	1.77e-09	U	NO
Timm9	432.486	1.60509	3.7e-48	U	NO
Cd163	61.0981	1.60405	9.19e-06	U	NO
Rab26os	24.3349	1.60193	2.97e-05	U	NO
Pex14	308.898	1.59977	1.13e-18	U	NO
Etfdh	4484.72	1.59739	4.39e-20	U	NO
Gm27252	18.7515	1.59632	0.000199484	U	NO
Hbb-bt	605.581	1.59472	3.25e-06	U	NO
Plin5	587.754	1.59349	1.4e-18	U	NO
Npnt	12.2732	1.59214	0.00436186	U	NO
Timm22	210.782	1.59068	7.1e-19	U	NO
Tmem88b	29.8501	1.58901	3.42e-07	U	NO
Gm49759	112.576	1.5887	1.12e-05	U	NO
4931406C07Rik	3745.81	1.58862	5.04e-26	U	NO
Tmem253	37.3062	1.58855	5.37e-06	U	NO
Alkbh3	414.797	1.58598	2.42e-33	U	NO
Atg4d	294.701	1.58489	7.15e-09	U	NO
Cabcoco1	81.7171	1.5816	2.51e-08	U	NO
Wdr73	141.145	1.58119	2.18e-10	U	NO
Gm3695	10.042	1.58044	0.00393306	U	NO
Gm35638	511.099	1.57989	1.23e-09	U	NO
Gin1	78.2702	1.57554	2.84e-13	U	NO
Them4	136.734	1.57549	1.51e-17	U	NO
Tmem41a	217.638	1.57381	2.02e-16	U	NO
Mlx	415.574	1.56924	6.3e-35	U	NO
Nme1	224.774	1.56729	3.77e-26	U	NO
Gm12276	30.8384	1.56472	1.03e-05	U	NO
Pank3	2384.97	1.56439	1.06e-13	U	NO
Bscl2	1248.01	1.56435	1.12e-14	U	NO
Noxred1	23.996	1.56312	0.000562352	U	NO
Rpl39l	19.91	1.56276	0.00554028	U	NO
Dnajc25	322.213	1.56244	1.15e-20	U	NO
Tent5c	37.6292	1.55604	3.4e-06	U	NO
Got1	1015.07	1.5506	0.00952582	U	NO
Gars	1017.98	1.54669	8.82e-30	U	NO
mt-Ty	19.4268	1.54482	0.0446574	U	NO
Gm29718	18.6513	1.54358	0.000151406	U	NO
4732491K20Rik	26.5592	1.53917	0.000108999	U	NO
Stmn2	30.2951	1.53442	1.65e-05	U	NO
Rfx2	61.0937	1.53115	1.18e-06	U	NO
Gm3375	49.3292	1.52749	1.6e-09	U	NO
Psmc4	706.842	1.52513	2.06e-12	U	NO
Gm5182	354.303	1.52297	0.0125276	U	NO
Psma6	1246.52	1.52296	6.58e-29	U	NO
Tuba1c	44.1783	1.52187	0.00220444	U	NO
1700029I15Rik	18.4287	1.51611	0.000242025	U	NO
Ang	24.3398	1.51484	3.47e-05	U	NO
Adat2	28.8163	1.50924	1.37e-06	U	NO
Dhcr24	205.877	1.50748	3.95e-09	U	NO
Ms4a6d	18.79	1.50701	0.000109184	U	NO
Gm4735	23.1739	1.50483	0.00227723	U	NO
9630013D21Rik	90.3116	1.50057	2.23e-07	U	NO
Ephx2	2794.85	1.49797	1.86e-21	U	NO
Derl1	1598.04	1.49741	4.56e-13	U	NO
Gm37607	33.6669	1.49725	0.000461157	U	NO
Slc22a15	160.433	1.4936	7.7e-14	U	NO
mt-Tq	10.8509	1.49328	0.00585318	U	NO
Acot4	216.639	1.49256	8.5e-05	U	NO
Nabp1	2162.19	1.49214	8.09e-09	U	NO
Gm10643	11.3102	1.49201	0.0165438	U	NO
Msantd3	211.923	1.49148	6.54e-12	U	NO
B430212C06Rik	117.945	1.49131	3.35e-10	U	NO
Timm10b	375.72	1.48863	1.39e-19	U	NO
Lclat1	509.263	1.47557	1.15e-20	U	NO
Gm17484	12.6747	1.47506	0.0168879	U	NO
Eno1b	218.888	1.47435	0.0269754	U	NO
Sgcd	71.111	1.47008	3.41e-14	U	NO
Cycs	228.06	1.46776	2.01e-08	U	NO
AC154492.2	35.3617	1.46657	0.000114536	U	NO
Ccdc125	34.642	1.46652	2.9e-05	U	NO
Atp6v0a2	648.583	1.46102	1.84e-16	U	NO
Car13	398.172	1.45662	8.6e-16	U	NO
3110045C21Rik	12.1405	1.45441	0.00613257	U	NO
Ctsz	1932.66	1.44859	2.39e-11	U	NO
Dnajc11	546.487	1.44763	1.31e-20	U	NO
Psmd12	475.143	1.44693	2.52e-13	U	NO
Leo1	69.6209	1.4427	9.06e-09	U	NO
Nebl	13.8725	1.44025	0.00281644	U	NO
Elmod2	857.009	1.43746	3.21e-15	U	NO
Ccdc69	177.858	1.43665	1.41e-09	U	NO
Mogat1	74.493	1.43257	7.03e-08	U	NO
Trmt10c	176.297	1.42761	4.86e-11	U	NO
Gm17823	1047.6	1.42734	1.37e-05	U	NO
Arxes1	160.163	1.42356	3.84e-07	U	NO
Tank	534.717	1.42337	3.68e-09	U	NO
BC025920	36.9684	1.42302	8.34e-06	U	NO
Fam49b	254.813	1.42289	1.67e-17	U	NO
Gm5560	118.516	1.42162	1.38e-08	U	NO
Gm37296	11.2231	1.41544	0.0167874	U	NO
Gm36816	29.229	1.41482	2.73e-05	U	NO
Lncbate1	416.177	1.41398	3.46e-11	U	NO
Armc6	37.0151	1.40933	5.18e-06	U	NO
S1pr5	27.2907	1.40925	0.000205926	U	NO
Gm45188	50.2633	1.40902	0.000200803	U	NO
Tmem37	1147.36	1.40716	2.94e-12	U	NO
Gm6123	2305.01	1.40375	3.53e-07	U	NO
Aldoart2	154.481	1.40314	5.87e-06	U	NO
Lpcat3	734.97	1.39941	1.46e-07	U	NO
Gm20300	164.176	1.39664	1.59e-07	U	NO
B230377A18Rik	17.7266	1.39406	0.00110589	U	NO
Psmb5	31.5962	1.39277	0.0476007	U	NO
Cox20	835.571	1.39081	1.91e-11	U	NO
Gm11222	12.1208	1.38508	0.00333666	U	NO
Gm14538	17.6976	1.38496	0.0016358	U	NO
Sfxn5	207.403	1.38286	9.05e-11	U	NO
Thoc6	37.4479	1.38173	9.56e-05	U	NO
Gm19807	10.2241	1.38164	0.0155449	U	NO
Stard5	227.195	1.38133	5.35e-15	U	NO
Gm5452	16.2576	1.3811	0.00461362	U	NO
Rexo2	831.438	1.37988	7.58e-12	U	NO
Dpy19l1	163.897	1.37731	1.98e-13	U	NO
Tmem69	462.661	1.37706	8.3e-13	U	NO
Ldlr	488.99	1.37503	6.57e-08	U	NO
Gm14270	111.885	1.3745	1.03e-06	U	NO
Naa30	453.952	1.37422	9.54e-12	U	NO
Gm12444	17.9415	1.37409	0.00264398	U	NO
Gja1	1189.13	1.37336	2.44e-18	U	NO
Gm8055	58.0213	1.37171	0.0027651	U	NO
Aldoa	26465.6	1.36909	1.46e-07	U	NO
Gm5510	72.7199	1.36827	1.35e-07	U	NO
6430511E19Rik	12.0286	1.36704	0.00422535	U	NO
Clec10a	18.2473	1.36577	0.0070582	U	NO
Pgam1-ps2	47.2454	1.36248	0.000315114	U	NO
Pcdhb16	13.3508	1.36022	0.00130251	U	NO
Gm5276	39.7008	1.36005	0.0349282	U	NO
Armc1	456.616	1.35813	6.65e-14	U	NO
Tmem147	2110.88	1.35791	1.29e-29	U	NO
Igsf21	95.6457	1.35741	1.28e-06	U	NO
Scp2-ps2	516.448	1.35704	5.48e-10	U	NO
March3	26.5587	1.35412	5.73e-05	U	NO
Gm16163	18.028	1.35273	0.00302443	U	NO
Rbks	35.4201	1.35256	2.08e-05	U	NO
G3bp2	1089.02	1.35098	3.17e-24	U	NO
Gm8181	30.3186	1.35021	0.000148197	U	NO
Acp5	1244.38	1.34858	1.63e-11	U	NO
Emc6	1128.78	1.34842	9.75e-20	U	NO
Rbp7	279.801	1.34819	0.0178642	U	NO
Nudt19	879.739	1.34804	1.96e-20	U	NO
Cela1	10.6273	1.34741	0.0376779	U	NO
Slc12a2	744.236	1.3474	1.51e-06	U	NO
Fam241a	200.281	1.34667	6.27e-11	U	NO
Cox19	1115.25	1.34349	6.47e-15	U	NO
Spata17	29.3398	1.34329	6.04e-05	U	NO
Gm6316	31.0757	1.34325	3.41e-05	U	NO
Scp2	603.003	1.34187	8.14e-06	U	NO
Gm14719	28.6103	1.34125	0.00192858	U	NO
2002-03-01	82.2271	1.33955	3.6e-07	U	NO
Ndufaf1	957.426	1.3381	1.34e-10	U	NO
Shroom1	24.8877	1.33723	0.0025908	U	NO
Pmvk	136.421	1.33678	2.04e-07	U	NO
Gm3222	11.9683	1.33654	0.0336734	U	NO
Gfm1	874.349	1.33409	2.57e-18	U	NO
Gm29667	19.1635	1.3315	0.0269677	U	NO
Ccdc122	34.5472	1.33129	1.97e-05	U	NO
Lamb3	37.6082	1.33086	5.29e-05	U	NO
Fam173b	110.851	1.32957	9.22e-14	U	NO
Zfp423	140.907	1.32937	1.05e-17	U	NO
Cox10	467.155	1.32901	9.68e-16	U	NO
4632418H02Rik	14.3716	1.32814	0.0117895	U	NO
Pex13	771.582	1.32361	1.09e-16	U	NO
Lsm1	154.92	1.32211	2.27e-11	U	NO
Lrrc59	1615.74	1.3216	3.93e-18	U	NO
Arxes2	757.06	1.31961	6.02e-05	U	NO
St7l	139.277	1.31786	9.27e-23	U	NO
Cpt2	7129.3	1.31746	4.27e-15	U	NO
Arpc5l	657.669	1.31737	1.98e-13	U	NO
Gm7984	255.427	1.31635	7.67e-12	U	NO
Fgf9	21.8017	1.31413	0.0478775	U	NO
Folr2	22.3335	1.31355	0.00654053	U	NO
Insl6	27.0922	1.313	0.000114534	U	NO
Gm18584	12.8136	1.31216	0.0162933	U	NO
Crispld1	19.8828	1.30968	0.000378543	U	NO
Ccdc51	37.3497	1.30895	3.8e-06	U	NO
Tmem199	97.8269	1.30881	1.48e-10	U	NO
Ripor2	80.6846	1.30839	2.3e-07	U	NO
F13a1	60.552	1.30769	0.000423965	U	NO
Mtor	1308.3	1.30723	6.74e-23	U	NO
Ldah	525.614	1.30608	2.48e-18	U	NO
Cyb5rl	43.3275	1.3056	7.29e-05	U	NO
Gpatch4	27.8073	1.30435	5.55e-05	U	NO
Echdc1	2030.65	1.30204	4.07e-05	U	NO
Gm2445	23.1567	1.30136	0.0106217	U	NO
Gm4217	20.6343	1.30131	0.0434405	U	NO
Gm8756	171.19	1.29502	0.00171203	U	NO
Grpel1	1012.1	1.29379	8.9e-14	U	NO
Bysl	147.112	1.29372	0.000319373	U	NO
Gm6997	43.6735	1.29161	7.67e-06	U	NO
Pgs1	83.4262	1.29072	5.95e-09	U	NO
Spaca1	17.4489	1.29004	0.0230131	U	NO
Gm5787	16.8482	1.28983	0.0217145	U	NO
Slc26a10	52.2165	1.28814	3.18e-06	U	NO
Gm3200	22.5445	1.28764	0.0141062	U	NO
Dynll2	819.522	1.28635	1.51e-15	U	NO
Slc16a10	335.399	1.28518	2.31e-07	U	NO
Sox5os4	14.7645	1.28495	0.00577519	U	NO
Alyref2	11.3338	1.28365	0.0153989	U	NO
Fasn	56629.4	1.28362	0.000222434	U	NO
Eef1akmt1	138.354	1.28214	1.26e-12	U	NO
Mdrl	37.6968	1.2821	9.92e-05	U	NO
Timm10	460.144	1.28084	2.19e-14	U	NO
Ncoa4	34.6858	1.2798	0.00141044	U	NO
Tgoln1	3278.92	1.27918	7.31e-12	U	NO
B230307C23Rik	11.5029	1.27766	0.00570412	U	NO
Tpt1	781.994	1.27692	0.0137094	U	NO
0610025J13Rik	16.6351	1.27679	0.00122098	U	NO
Decr1	2874.26	1.27631	6.47e-12	U	NO
Rpp14	317.376	1.27407	9.18e-19	U	NO
Usp43	25.705	1.27379	0.00214799	U	NO
Mthfd2	30.202	1.27146	0.00792637	U	NO
Cdc34b	91.6352	1.27083	4.62e-09	U	NO
Tefm	128.444	1.26934	1.81e-11	U	NO
Col14a1	22.1259	1.26876	0.0140631	U	NO
Dgat1	934.532	1.26853	1.25e-05	U	NO
C1rl	43.7971	1.26758	1.64e-05	U	NO
Gm12096	46.699	1.26728	1.85e-05	U	NO
Ldha	8223.25	1.26649	3.28e-07	U	NO
2009-09-01	518.821	1.26646	5.16e-08	U	NO
Tbrg4	338.257	1.26641	5.4e-16	U	NO
Cxadr	670.755	1.26612	9.7e-11	U	NO
Mrm3	52.2302	1.26612	5.03e-08	U	NO
Tmem70	972.793	1.26606	9.17e-09	U	NO
Klb	300.094	1.26553	1.56e-09	U	NO
Mc5r	23.4354	1.26521	0.0155066	U	NO
Atp1a3	25.6005	1.26416	0.0419696	U	NO
Ciao2a	530.738	1.2638	8.71e-19	U	NO
Efr3b	80.9503	1.26313	3.56e-09	U	NO
Gm11708	17.5014	1.25962	0.0016771	U	NO
Gm12017	23.3174	1.2576	0.0274548	U	NO
Gm1866	14.0276	1.25698	0.0219803	U	NO
Usp33	364.954	1.25684	9.48e-11	U	NO
Apex1	200.917	1.2566	9.48e-14	U	NO
3110001I22Rik	77.835	1.25522	0.000543808	U	NO
Rabl3	119.145	1.2549	1.03e-08	U	NO
Ptdss2	480.749	1.25424	3.24e-16	U	NO
Gm45187	121.006	1.25397	1.44e-08	U	NO
Pmf1	144.949	1.25348	5.35e-07	U	NO
Tmx4	599.752	1.25276	7.19e-08	U	NO
Psmd14	376.304	1.25269	4.52e-11	U	NO
1810034E14Rik	43.7159	1.25163	3.23e-06	U	NO
Gm7099	105.514	1.25049	1.14e-08	U	NO
Ppp1r3c	468.8	1.24924	8.92e-05	U	NO
Gm5776	65.4193	1.24908	3.37e-07	U	NO
H2-Q10	1082.37	1.248	9.52e-08	U	NO
Mcc	495.838	1.24761	2.91e-15	U	NO
Cat	6082.85	1.2462	4.46e-14	U	NO
Gm45133	26.387	1.24567	3.73e-05	U	NO
Gm8069	158.435	1.24523	2.34e-08	U	NO
Mdh1	7966.89	1.24484	5.12e-20	U	NO
4921536K21Rik	15.6967	1.24157	0.00658764	U	NO
Gm9247	88.8349	1.24115	1.15e-06	U	NO
Ss18l2	402.436	1.23916	1.54e-09	U	NO
Slc18b1	431.868	1.23859	2.69e-15	U	NO
2810001G20Rik	26.8031	1.23813	1.99e-05	U	NO
Tpcn2	30.6919	1.23699	0.000302805	U	NO
Fbxo44	177.056	1.23618	2.43e-14	U	NO
Mrpl19	247.569	1.23538	3.97e-14	U	NO
Adamts5	155.93	1.23507	1.65e-07	U	NO
Krt79	12.1291	1.23294	0.0348687	U	NO
Kcnk3	1900.89	1.23242	3.21e-08	U	NO
G6pd2	80.7273	1.23193	0.00233657	U	NO
Msmo1	301.648	1.23151	7.31e-12	U	NO
Ehbp1l1	241.688	1.23135	2.98e-06	U	NO
Gm7251	15.5083	1.23048	0.0326795	U	NO
Cnst	945.784	1.22853	7.95e-09	U	NO
Xrcc3	63.5093	1.22745	1.99e-06	U	NO
Ndufa11b	1041.18	1.22589	1.62e-06	U	NO
Gm9791	157.401	1.22581	5.18e-05	U	NO
Gm12115	81.6221	1.22296	8.31e-07	U	NO
Slirp	415.376	1.22105	5.95e-06	U	NO
Acad9	143.089	1.21423	3.15e-16	U	NO
Gm5626	85.529	1.21368	6.73e-06	U	NO
Nsun5	150.551	1.21334	2.9e-10	U	NO
8430422M14Rik	13.4981	1.21324	0.00720825	U	NO
Hip1r	77.4606	1.21191	0.000875834	U	NO
Rbp4	928.635	1.21166	0.000962998	U	NO
Gm43609	10.3097	1.21081	0.0463139	U	NO
Apex2	109.769	1.2101	8.7e-08	U	NO
Ppdpf	66.5424	1.20942	4.83e-06	U	NO
Bet1	211.36	1.20736	1.83e-09	U	NO
Sco1	125.04	1.20651	9.63e-08	U	NO
Mrps5	284.682	1.2059	2.47e-09	U	NO
Mrps23	701.366	1.2059	2.59e-15	U	NO
Pnp	381.921	1.20543	1.43e-06	U	NO
Gm9062	21.3348	1.20518	0.00466608	U	NO
Acox1	5257.4	1.20341	3.62e-15	U	NO
Fabp4	56364.5	1.20302	1.02e-26	U	NO
Pfkl	1117.69	1.20272	1.23e-06	U	NO
Cox15	436.362	1.2019	1.33e-17	U	NO
Tmem56	104.581	1.20168	9.95e-05	U	NO
Dhrs11	495.227	1.20014	2.01e-10	U	NO
Zdhhc23	55.0317	1.20007	9.16e-05	U	NO
Fuom	328.397	1.19984	1.31e-12	U	NO
Swsap1	81.4026	1.19754	1.4e-07	U	NO
Psma1	714.035	1.19735	2.86e-10	U	NO
Tmem8	70.5204	1.1959	2.34e-07	U	NO
Gm12346	32.0835	1.19555	0.0265553	U	NO
Flad1	283.702	1.19455	1.92e-12	U	NO
Fam162a	1154.64	1.19219	8.99e-29	U	NO
Uqcrfs1	11772.1	1.19217	1.31e-19	U	NO
Rab5if	1698.78	1.19126	5.51e-20	U	NO
Shox2	33.9316	1.18999	0.00425845	U	NO
Taf13	187.114	1.1897	8.29e-05	U	NO
Tomm5	79.2777	1.18966	0.00304661	U	NO
Otud6b	210.739	1.18966	6.57e-08	U	NO
Thbs2	49.1685	1.18848	0.0426955	U	NO
Hist1h2bc	212.138	1.18838	0.00118138	U	NO
6530402F18Rik	24.9912	1.18781	0.000638352	U	NO
Ptcd2	380.582	1.18762	5.22e-13	U	NO
Aste1	123.434	1.18756	4.61e-10	U	NO
Pgam1	51.4121	1.18686	8.11e-06	U	NO
Gm49331	16.7475	1.18673	0.0284113	U	NO
Gm12906	103.368	1.18561	5.49e-05	U	NO
Gm12751	257.455	1.18483	8.62e-06	U	NO
Ubxn8	156.366	1.18445	6.08e-12	U	NO
Tmem126a	417.66	1.18367	4.87e-16	U	NO
Gon7	29.9163	1.18197	0.000255713	U	NO
Gm19587	17.6432	1.18169	0.0113943	U	NO
Hspa4	701.104	1.18084	6.29e-21	U	NO
Satb2	14.0544	1.17987	0.00328208	U	NO
Pepd	185.678	1.17975	5.08e-07	U	NO
Cops5	221.676	1.17949	9.61e-12	U	NO
Coa3	801.616	1.17932	3.45e-10	U	NO
Gm16373	30.3772	1.17804	0.00117262	U	NO
Uros	244.095	1.17714	2.44e-09	U	NO
Lactb2	884.022	1.17618	0.000134169	U	NO
Mrm2	110.927	1.17607	7.43e-10	U	NO
3000002C10Rik	17.0482	1.175	0.0126375	U	NO
Cmc2	335.366	1.17315	1.15e-08	U	NO
Pex1	72.2773	1.17205	1.93e-09	U	NO
Taco1	116.24	1.17069	4.67e-05	U	NO
Mecomos	11.5697	1.16992	0.0177844	U	NO
Gm3839	42.0502	1.16961	0.0273237	U	NO
Hmgcs2	31.6146	1.16926	0.025576	U	NO
A530053G22Rik	253.464	1.16908	0.000108791	U	NO
Fam181b	24.5305	1.16829	0.0325413	U	NO
Eif1ad	306.71	1.16809	1.52e-12	U	NO
Fam120aos	490.131	1.16784	1.1e-13	U	NO
Med8	138.363	1.16779	7.27e-13	U	NO
Tshr	154.953	1.16644	0.00306225	U	NO
Spsb3	90.0913	1.16628	2.03e-08	U	NO
Pde8b	13.4443	1.16592	0.0119381	U	NO
Taldo1	2101.94	1.16509	3.53e-07	U	NO
Aacs	694.887	1.16484	0.0192387	U	NO
Snca	38.6574	1.16354	0.000200803	U	NO
Gm2962	545.171	1.16316	0.000136374	U	NO
Rpl7l1	458.839	1.16308	2.61e-09	U	NO
Fam126b	346.425	1.16305	1.05e-05	U	NO
Rpl36a-ps3	59.382	1.16265	5.93e-07	U	NO
Hipk2	112.029	1.1623	6.92e-10	U	NO
Mmd2	308.304	1.16194	0.0329502	U	NO
Ndufab1	1551.27	1.16088	5.89e-07	U	NO
Gdf10	41.2217	1.16013	0.00019057	U	NO
Slc16a1	2438.24	1.15953	2.06e-08	U	NO
Bud31	421.043	1.15788	1.33e-19	U	NO
Gm7868	30.0665	1.15764	0.000897206	U	NO
Ptprr	11.7332	1.15716	0.0321325	U	NO
Trmu	53.8805	1.15427	6.39e-06	U	NO
Aspa	646.792	1.15375	2.05e-11	U	NO
Gm11814	18.202	1.15352	0.0148827	U	NO
Shtn1	108.596	1.15305	3.38e-07	U	NO
Mrps27	253.323	1.15164	1.29e-15	U	NO
Mrpl15	654.69	1.15033	1.44e-14	U	NO
Pak1ip1	332.926	1.14876	3.27e-08	U	NO
Rmdn1	158.847	1.14803	2.27e-05	U	NO
Ppp1r3d	460.476	1.14775	5.15e-10	U	NO
Lipa	1354.81	1.14731	6.24e-12	U	NO
Slc25a5	1618.23	1.14726	1.1e-09	U	NO
Fbxo33	127.629	1.14686	3.98e-07	U	NO
Gm2011	30.6373	1.14654	0.0026574	U	NO
Mrpl1	160.224	1.14511	1.94e-06	U	NO
Gm7390	20.8405	1.14472	0.00598771	U	NO
Polr1d	1104.25	1.14375	1.74e-17	U	NO
Oxsm	172.751	1.14347	1.73e-06	U	NO
Atp6v0e	3437.59	1.14345	8.27e-13	U	NO
Psmb7	427.358	1.14279	1.65e-10	U	NO
Hmbs	51.1295	1.14231	0.00253222	U	NO
Ccn3	12.6383	1.14133	0.0315811	U	NO
Tmem110	272.879	1.14015	9.53e-09	U	NO
Ran	214.563	1.13985	3.28e-05	U	NO
Ube2f	481.457	1.13931	2.71e-11	U	NO
Emc4	345.937	1.13858	3.34e-20	U	NO
2810030D12Rik	60.3622	1.13799	7.06e-05	U	NO
Slc52a2	75.1384	1.13451	1.96e-06	U	NO
Cyyr1	394.348	1.13388	1.86e-06	U	NO
Mrpl43	449.205	1.13365	2.57e-13	U	NO
Acsl3	145.867	1.13291	4.42e-09	U	NO
N6amt1	159.017	1.13215	1.89e-08	U	NO
Denr	184.082	1.1321	3.38e-06	U	NO
Mrap	1273.45	1.13169	2.33e-07	U	NO
Gm9803	1651.3	1.13093	4.4e-13	U	NO
Mpc1	166.371	1.13092	8.71e-09	U	NO
Stxbp2	190.358	1.1306	4.14e-09	U	NO
Mab21l2	191.771	1.1298	4.98e-06	U	NO
Nr1h3	356.693	1.12974	1.1e-05	U	NO
Nav3	42.1127	1.12832	0.00283194	U	NO
Tulp4	191.951	1.12828	3.45e-17	U	NO
Ppp1r1a	317.069	1.12737	1.78e-07	U	NO
Hsd11b1	3017.05	1.12695	0.00072155	U	NO
Zfp961	185.171	1.12648	6e-09	U	NO
Dagla	270.507	1.12471	0.00042293	U	NO
Gm30173	16.5825	1.12331	0.00456977	U	NO
Gm4335	37.7349	1.12133	0.0210647	U	NO
Atp6v1d	810.963	1.1206	1.71e-11	U	NO
Pde4d	541.768	1.11976	0.0258499	U	NO
Mrps33	158.042	1.11968	0.0121935	U	NO
Uba3	244.057	1.11903	4.69e-07	U	NO
Mtx2	376.877	1.11892	4.27e-09	U	NO
Ric3	184.358	1.11862	9.89e-06	U	NO
Flcn	835.578	1.11808	1.84e-11	U	NO
Nat8l	791.227	1.11675	4.31e-08	U	NO
Dctn5	543.483	1.11673	1.51e-08	U	NO
Uxt	55.1391	1.11654	0.0062514	U	NO
Adal	66.4724	1.1164	8.79e-07	U	NO
Mgll	6234.68	1.11534	3.31e-10	U	NO
Snap47	224.047	1.11483	9.33e-13	U	NO
Rnf7	873.227	1.11483	7.01e-10	U	NO
Uck1	295.075	1.11401	0.000626496	U	NO
Gm6227	16.7834	1.11247	0.00521584	U	NO
Gm49396	23.4197	1.11234	0.00358683	U	NO
Acyp2	622.433	1.11201	1.17e-07	U	NO
Ndufb6	2405.18	1.1112	5.19e-07	U	NO
Ell2	393.52	1.10941	7.23e-06	U	NO
Elmod1	54.6003	1.10924	0.00392829	U	NO
Wipi2	583.152	1.10794	4.75e-05	U	NO
Tomm70a	735.636	1.10711	2.4e-12	U	NO
Atp6v0c-ps2	19.6166	1.107	0.0139335	U	NO
Acaca	1574.36	1.10686	0.000335271	U	NO
Alg3	112.292	1.10675	4.7e-05	U	NO
Stambpl1	36.0117	1.10624	0.00167721	U	NO
Mppe1	65.6112	1.10212	0.000171378	U	NO
Mmachc	1400.94	1.10198	9.22e-07	U	NO
Gm11516	14.6494	1.10037	0.0192598	U	NO
Ilvbl	63.5138	1.1003	1.25e-05	U	NO
A930033H14Rik	39.558	1.09868	0.000135235	U	NO
Calr-ps	21.6841	1.09778	0.0499398	U	NO
Hoxa4	255.617	1.09681	1.32e-11	U	NO
Polr1e	42.7697	1.09659	8.8e-06	U	NO
Gm45606	11.6518	1.09596	0.0281007	U	NO
Gm5131	672.806	1.09532	0.000120925	U	NO
Tyms	25.3032	1.0921	0.00136814	U	NO
Vps13c	102.414	1.09139	1.04e-08	U	NO
Gm5256	56.2299	1.0906	0.0331173	U	NO
Gm15770	40.6019	1.09018	3.69e-05	U	NO
Gm13493	12.6648	1.09002	0.0216864	U	NO
Ap1b1	317.078	1.08915	1.24e-09	U	NO
Phb	769.42	1.0886	2.8e-16	U	NO
Rragc	2372.57	1.08738	7.96e-24	U	NO
Lman2	2121.1	1.08647	5.34e-17	U	NO
Mrpl51	662.388	1.08584	0.000404298	U	NO
Ints2	91.8304	1.08578	1.19e-05	U	NO
Ppih	10.9947	1.0855	0.0342886	U	NO
Btd	382.472	1.08541	1.44e-09	U	NO
Gm4246	25.8634	1.08472	0.0340915	U	NO
Ttc19	273.898	1.08254	2.82e-09	U	NO
Gm47593	23.0327	1.08185	0.0366612	U	NO
Hspa9-ps1	512.56	1.08168	0.000104654	U	NO
Nfil3	89.9198	1.08081	0.0206612	U	NO
Zfp219	137.082	1.08044	2.22e-07	U	NO
S1pr4	11.5255	1.08034	0.0243577	U	NO
Morc4	50.9719	1.08012	4.94e-05	U	NO
Tigar	258.637	1.0794	2.44e-10	U	NO
Gm13461	297.667	1.07899	5.71e-13	U	NO
Gm14539	1539.34	1.07841	7.93e-05	U	NO
Chchd4	541.789	1.07837	1.17e-09	U	NO
Gm13904	21.1152	1.07827	0.0304039	U	NO
Ppp2r1b	696.501	1.07758	0.000315457	U	NO
Exosc4	217.679	1.07503	3.81e-12	U	NO
Vwa8	2595.39	1.07334	2.26e-10	U	NO
AC114990.1	152.338	1.07017	0.00531279	U	NO
Fgd4	134.117	1.06923	8.07e-05	U	NO
2310068J16Rik	20.2545	1.06911	0.00487807	U	NO
Nipa2	233.694	1.06881	2.84e-08	U	NO
Gm4482	236.299	1.06849	8.65e-06	U	NO
Mob1b	559.574	1.0672	3.12e-06	U	NO
Cidec	6598.19	1.06546	9.53e-09	U	NO
Pigq	800.458	1.06451	4.92e-09	U	NO
Nxnl1	14.0766	1.06409	0.0250446	U	NO
Maip1	218.825	1.0636	1.22e-07	U	NO
Fkbpl	67.2512	1.06309	0.000179793	U	NO
Mtif2	220.214	1.06208	4.76e-06	U	NO
Gm10221	88.8535	1.06161	0.0198428	U	NO
Gm1833	23.2966	1.06122	0.0304873	U	NO
Pop7	225.666	1.06103	1.82e-12	U	NO
Ttll11	12.8645	1.05985	0.0341372	U	NO
Gm1818	72.9866	1.05935	0.000128203	U	NO
Gm31814	47.0198	1.05859	0.000638227	U	NO
Gm7666	130.225	1.05859	1.7e-05	U	NO
AW046200	10.5528	1.05751	0.048678	U	NO
Mrpl16	447.783	1.05671	2.98e-09	U	NO
Cpt1b	30.5725	1.05549	0.0270562	U	NO
Zfp106	650.367	1.05326	9.15e-07	U	NO
Gm42855	47.4807	1.05259	0.00215832	U	NO
Med29	23.1054	1.05232	0.0123387	U	NO
Atp6v1h	548.265	1.05173	3.87e-11	U	NO
Grk3	605.049	1.05123	2.73e-06	U	NO
Gm3272	13.4414	1.04977	0.0372127	U	NO
Tatdn1	60.0104	1.04951	2.21e-05	U	NO
Prickle1	136.433	1.04751	3.71e-07	U	NO
Tmem208	145.176	1.04311	5.54e-08	U	NO
Uqcrc2	3864.4	1.0431	3.31e-07	U	NO
Smdt1	1387.72	1.04274	2.41e-10	U	NO
Hacl1	242.958	1.04257	1.05e-06	U	NO
Oplah	447.056	1.04161	3.78e-10	U	NO
Tmem33	709.942	1.03975	1.24e-08	U	NO
Fam228b	31.7641	1.03832	0.00995415	U	NO
Pnpla8	1245.67	1.03827	3.72e-06	U	NO
Ncbp1	251.924	1.03784	7.04e-10	U	NO
Fibin	32.7813	1.03769	0.00309529	U	NO
Gm16089	625.832	1.037	0.000546239	U	NO
Gm8242	147.13	1.0369	3.38e-07	U	NO
Msra	448.37	1.03668	8.92e-12	U	NO
Gm28883	46.9058	1.03587	0.00213978	U	NO
Abcb7	217.441	1.03516	1.4e-05	U	NO
Ube2a	702.98	1.0348	4.09e-09	U	NO
Tomm22	490.449	1.03328	6.36e-14	U	NO
Plaa	431.195	1.03301	8.06e-07	U	NO
Gm1840	3037.43	1.03261	7.03e-08	U	NO
Zbtb40	54.1127	1.03232	8.63e-05	U	NO
Ttc30b	218.961	1.03167	7.37e-06	U	NO
Slc33a1	197.54	1.03071	2.67e-06	U	NO
Lamp1	3567	1.03036	4.66e-12	U	NO
Abca7	62.6864	1.03016	1.7e-05	U	NO
Hacd1	100.54	1.02887	0.000492516	U	NO
Gm6374	14.5012	1.02878	0.0474842	U	NO
Lypla1	884.903	1.02846	1.94e-08	U	NO
Gm17634	27.2882	1.02756	0.0057612	U	NO
Gm47451	318.186	1.02719	0.005232	U	NO
Gm14017	148.862	1.02711	7e-05	U	NO
Sod2	6689.34	1.02597	7.35e-07	U	NO
Hadhb	3223.49	1.02545	0.00110827	U	NO
Gm13131	263.855	1.0247	0.000143115	U	NO
Car2	174.555	1.02439	7.07e-06	U	NO
Sh3bgrl2	157.535	1.02151	4.86e-08	U	NO
Gm14167	11.3885	1.0213	0.0475511	U	NO
Higd1b	17.6841	1.02045	0.0306099	U	NO
Gm45902	11.7569	1.02018	0.0343422	U	NO
Slc6a6	1591.53	1.01981	2.43e-08	U	NO
Emc8	299.976	1.01978	1.71e-15	U	NO
Crat	10695.3	1.01846	2.35e-07	U	NO
Slc31a1	483.386	1.01788	2.38e-09	U	NO
Gm12222	94.7074	1.01768	0.0308192	U	NO
Gm6542	204.899	1.01676	1.39e-05	U	NO
Msrb1	762.876	1.01634	1.26e-06	U	NO
Fbxl6	114.552	1.01525	4.36e-06	U	NO
Xylt1	36.9351	1.01516	0.0060986	U	NO
Pex5	553.572	1.01418	2.88e-06	U	NO
Tmem135	1461.85	1.01411	7.18e-07	U	NO
Slc46a1	84.4209	1.01359	6.55e-05	U	NO
Wdr12	50.7958	1.01357	0.00137555	U	NO
9030407P20Rik	19.2937	1.01232	0.00673957	U	NO
Mtif3	146.204	1.01118	1.19e-10	U	NO
Lrrn4cl	23.9169	1.00988	0.00443526	U	NO
Gpaa1	206.025	1.0087	0.000239328	U	NO
Slc11a2	346.915	1.00762	4.64e-20	U	NO
Atf5	834.848	1.00732	0.000122151	U	NO
Spag1	27.5389	1.00714	0.00147856	U	NO
Car14	88.7512	1.00581	0.0204233	U	NO
Glyctk	20.3367	1.00563	0.00758573	U	NO
Hspe1	1160.46	1.00522	9.75e-11	U	NO
Pfdn6	52.2916	1.00439	0.000258083	U	NO
Xkr6	26.3603	1.00403	0.00318954	U	NO
Gm7180	398.762	1.00396	1.75e-05	U	NO
Rps6ka1	55.0932	1.00394	0.00148919	U	NO
Prkce	333.619	1.00241	5.77e-06	U	NO
Slc3a2	991.405	1.00215	8.64e-05	U	NO
Pde12	120.962	1.00148	1.56e-05	U	NO
Dolk	600.112	1.00116	5.5e-05	U	NO
Ypel2	158.174	1.00021	2.48e-07	U	NO
Pde3a	116.166	1.00005	0.000150269	U	NO
Gm5499	213.508	0.999937	9.52e-05	U	NO
9330020H09Rik	50.0517	0.999882	2.97e-05	U	NO
Coa6	193.237	0.999506	1.24e-06	U	NO
Gm18335	21.8581	0.999058	0.0242701	U	NO
Lss	267.864	0.997881	1.43e-05	U	NO
Inmt	135.482	0.997694	0.048547	U	NO
Gm6181	23.2232	0.997671	0.00283025	U	NO
Nol4l	213.993	0.99687	2.17e-09	U	NO
Atp6v1e1	1120.81	0.996299	1.26e-10	U	NO
Tst	188.435	0.995386	0.000106657	U	NO
Rflnb	310.919	0.994909	6.64e-08	U	NO
Zfp697	74.0717	0.994895	0.000470254	U	NO
Mtfp1	489.121	0.994652	5.85e-11	U	NO
Sar1b	1711	0.994177	5.6e-05	U	NO
Csl	122.989	0.994085	0.00309379	U	NO
1700123O20Rik	263.743	0.993601	1.42e-09	U	NO
Gm13328	112.852	0.991152	8.2e-05	U	NO
Znrd1as	88.6954	0.989983	0.00286093	U	NO
Hsd17b4	1750.71	0.989675	1.95e-12	U	NO
Gm4887	38.7002	0.988787	0.00768873	U	NO
Tmem100	30.7429	0.98846	0.0341557	U	NO
Rtca	222.336	0.987918	2.25e-11	U	NO
2900093K20Rik	34.1572	0.987785	0.00613189	U	NO
Yars2	266.142	0.987113	2.51e-06	U	NO
Psmd6	184.7	0.985927	2.4e-11	U	NO
March5	1767.28	0.985874	6.01e-10	U	NO
Gm8188	18.4079	0.985803	0.0150203	U	NO
BC004004	1482.26	0.985575	8.68e-12	U	NO
Nipsnap1	161.512	0.984818	1.22e-05	U	NO
D330023K18Rik	69.6478	0.984057	3.65e-05	U	NO
Ltc4s	49.8375	0.983307	0.00532861	U	NO
Gm7707	25.9228	0.983078	0.0215078	U	NO
Gm6851	25.1724	0.981999	0.00607961	U	NO
4732440D04Rik	108.058	0.980637	0.000128249	U	NO
Calm1	4706.8	0.980418	1.15e-20	U	NO
5031439G07Rik	489.856	0.979932	2.76e-11	U	NO
Fam210a	1756.49	0.979706	9.13e-10	U	NO
Ccl6	56.5294	0.978087	0.00588948	U	NO
Dtx4	68.7923	0.977623	0.00274889	U	NO
Gipc1	64.6177	0.977236	0.00451855	U	NO
Gm37981	64.8299	0.977082	0.00105187	U	NO
Pkp4	494.703	0.976955	4e-12	U	NO
AI467606	11.8254	0.976285	0.049714	U	NO
Gpr135	135.033	0.975767	0.002619	U	NO
Slc25a39	2130.77	0.975457	1.37e-08	U	NO
Rtn4ip1	334.827	0.974516	2.94e-07	U	NO
Cd36	15364.4	0.9745	6.96e-11	U	NO
Gas2l1	299.577	0.973781	6.77e-08	U	NO
Ufsp2	195.632	0.972429	1.1e-07	U	NO
Ppp2ca	2644.21	0.972394	5.55e-06	U	NO
Tmx2	199.131	0.972321	0.037171	U	NO
Commd3	722.496	0.971604	2.84e-13	U	NO
Pigo	149.361	0.96911	1.59e-05	U	NO
Klhdc10	337.723	0.968011	1.08e-08	U	NO
Hmgcr	53.1254	0.967953	0.000861896	U	NO
Kyat3	503.593	0.967931	2.27e-09	U	NO
Zfp672	529.639	0.967682	1.45e-07	U	NO
Chid1	127.235	0.96746	2.09e-07	U	NO
Gstm6	18.6915	0.967052	0.0361208	U	NO
Ppp2r5b	138.085	0.965619	0.000133173	U	NO
Gm13077	23.4074	0.964927	0.0434202	U	NO
Nat1	25.2076	0.964904	0.0460334	U	NO
B430219N15Rik	28.1822	0.964583	0.0087109	U	NO
Gm4045	28.3859	0.964414	0.0165971	U	NO
Gm5037	24.9515	0.963583	0.015112	U	NO
Tmem60	458.011	0.963559	2.34e-05	U	NO
Alox12	23.8481	0.962965	0.00402596	U	NO
Gm30970	111.114	0.962847	0.0283927	U	NO
Mcts1	334.726	0.961513	4.36e-06	U	NO
Plpp1	395.207	0.961092	1.98e-05	U	NO
Cdc25a	79.186	0.960986	1.14e-07	U	NO
Mrpl37	728.98	0.960846	4.36e-10	U	NO
Poldip2	1183.25	0.960662	1.8e-09	U	NO
mt-Tm	80.3687	0.960079	0.0415381	U	NO
Rxrg	172.967	0.958679	5.42e-05	U	NO
Tcaim	182.759	0.958606	0.000251049	U	NO
Hspa8	1058.24	0.958554	0.000118482	U	NO
Tsfm	99.393	0.957748	1.67e-05	U	NO
Memo1	444.824	0.957205	1.86e-06	U	NO
Rnf11	1307.1	0.956226	1.54e-07	U	NO
Clcn5	53.2927	0.954047	4.5e-05	U	NO
Reep6	338.813	0.951531	0.000634822	U	NO
Ghitm	9427.07	0.951359	1.24e-09	U	NO
Fahd1	366.616	0.950812	5.76e-09	U	NO
Tmem223	148.574	0.950724	0.000508995	U	NO
Zfp770	137.581	0.950188	0.000153236	U	NO
Gm13612	40.3174	0.949737	0.0014694	U	NO
Ptcd3	303.764	0.949486	4.81e-10	U	NO
Gm13552	47.0319	0.949129	0.00200173	U	NO
Aldh3b2	57.1152	0.948861	0.000902947	U	NO
Cib1	142.783	0.948234	9.41e-07	U	NO
Ctxn1	30.1665	0.947894	0.0358975	U	NO
Insig1	511.784	0.946727	0.008333	U	NO
Dnajc15	1082.69	0.945849	3.49e-08	U	NO
Mrpl50	551.702	0.944561	1.18e-06	U	NO
Ociad2	28.2838	0.944152	0.039847	U	NO
1110019D14Rik	36.1965	0.94411	0.0209519	U	NO
D17Wsu92e	539.351	0.943897	2.59e-10	U	NO
Zkscan3	519.483	0.943741	2.74e-08	U	NO
Ap3s1-ps2	97.6419	0.941238	0.0281448	U	NO
Adck2	29.112	0.941009	0.00174544	U	NO
Gm8121	192.236	0.940898	1.12e-05	U	NO
Gm5434	16.1369	0.940061	0.0281337	U	NO
Pgap2	271.012	0.939276	2.38e-06	U	NO
Dhrs7b	686.278	0.938912	3.39e-08	U	NO
Fitm2	1437.17	0.937521	1.02e-14	U	NO
Dld	2334.74	0.937451	4.04e-09	U	NO
Gab2	88.7258	0.937422	3.92e-06	U	NO
Coasy	303.652	0.936985	1.84e-06	U	NO
Gm49284	26.3051	0.936044	0.00437157	U	NO
Borcs5	137.601	0.935527	2.97e-08	U	NO
D9Wsu149	62.7083	0.935395	0.0046161	U	NO
Acbd5	338.68	0.935342	5.79e-05	U	NO
Amacr	236.22	0.934381	9.04e-07	U	NO
Armt1	341.545	0.933368	1.36e-14	U	NO
Atp5mpl	856.717	0.933318	1.65e-10	U	NO
Gm6563	301.641	0.933022	1.81e-09	U	NO
Mmgt1	873.331	0.932444	8.17e-07	U	NO
Cxxc4	34.2859	0.932109	0.0107642	U	NO
Nhlrc1	42.3215	0.930844	0.0268171	U	NO
Abhd1	67.0486	0.930398	0.00589428	U	NO
Akirin1	97.3866	0.930066	0.000754124	U	NO
Hspd1-ps3	473.154	0.928979	0.00837087	U	NO
Itgae	32.1901	0.928667	0.00700406	U	NO
Naa25	220.09	0.928478	1.2e-06	U	NO
Timm17a	1355.89	0.927658	8.03e-11	U	NO
Taf2	483.917	0.927265	2.05e-08	U	NO
Mrps11	157.048	0.92714	0.000280326	U	NO
Agpat3	3165.84	0.927087	9.91e-08	U	NO
Rnf144a	458.13	0.926692	6.95e-10	U	NO
Atp6v1a	1166.73	0.925039	2.35e-06	U	NO
Nr2f6	199.547	0.925006	8.37e-05	U	NO
Ppp2r5a	3260.51	0.924357	6.42e-05	U	NO
Cox17	384.762	0.92398	5.97e-05	U	NO
0610009B22Rik	324.443	0.921755	0.00117095	U	NO
Bcap31	1620.43	0.919778	2.93e-18	U	NO
Fam57b	167.917	0.919114	0.0205008	U	NO
Fcor	305.96	0.918796	1.51e-10	U	NO
Ak6	94.5046	0.917414	2.35e-06	U	NO
Dbt	1151.05	0.91703	0.000380261	U	NO
Gnptg	136.917	0.916858	3.69e-05	U	NO
Cpsf2	184.478	0.916835	3.18e-10	U	NO
Med24	186.032	0.916724	7.65e-06	U	NO
Tfdp1	141.836	0.915995	9.75e-07	U	NO
Gm16418	198.496	0.914988	0.000614218	U	NO
Fam3c	175.098	0.91485	3.47e-05	U	NO
Mycbp	319.845	0.914659	1.63e-07	U	NO
Zfp91	1259.26	0.913739	6.69e-07	U	NO
Cdc34	235.203	0.913691	0.000874278	U	NO
Mrpl12	676.473	0.913468	9.82e-08	U	NO
Tfb2m	54.1605	0.91331	0.00502003	U	NO
4632404H12Rik	71.2042	0.912729	2.25e-05	U	NO
Ubqln1	1010.95	0.912467	5.4e-10	U	NO
AC117239.2	590.356	0.911727	1.36e-05	U	NO
Kcnb1	522.346	0.911684	0.00933842	U	NO
Nt5c2	260.072	0.911666	9.61e-10	U	NO
Mpdu1	557.475	0.911565	1.73e-08	U	NO
Cmbl	233.666	0.91063	0.00998737	U	NO
2210016F16Rik	233.032	0.910555	2.17e-09	U	NO
Dbi	16201.2	0.910487	5.77e-05	U	NO
Sco2	109.093	0.910281	9.82e-05	U	NO
Ndufaf2	133.382	0.909724	0.00070953	U	NO
Gm6293	20.0186	0.909134	0.037857	U	NO
Acvr1c	483.01	0.90904	3.27e-05	U	NO
Tada2b	384.918	0.90895	6.46e-06	U	NO
Gm5540	84.7392	0.907629	0.00464727	U	NO
AC102132.2	111.384	0.905984	0.00536321	U	NO
Als2cl	143.906	0.905339	7.8e-05	U	NO
Fmo1	4514.69	0.904868	5.76e-06	U	NO
Pex19	2613.59	0.90426	1.78e-16	U	NO
Hexim1	322.363	0.903768	0.00352708	U	NO
Eloc	1175.68	0.903185	8.23e-05	U	NO
Chmp6	101.855	0.903166	9.43e-06	U	NO
Mpzl2	1356.99	0.902889	3.38e-06	U	NO
Gm12231	1263.65	0.901882	1.5e-05	U	NO
Pmpcb	1122.76	0.901432	1.28e-05	U	NO
Tmbim4	701.944	0.901357	6.91e-11	U	NO
Car8	29.484	0.901272	0.00527468	U	NO
Adipor2	4981.38	0.9002	1.43e-05	U	NO
Agpat5	240.388	0.899821	1.32e-05	U	NO
Atp6v0b	232.473	0.899573	8.64e-05	U	NO
1700086O06Rik	75.813	0.899326	3.55e-05	U	NO
Gm14494	139.475	0.899252	2.94e-08	U	NO
Parm1	3712.47	0.898851	2.27e-05	U	NO
Gpatch11	97.7938	0.898847	4.37e-09	U	NO
Hoxc8	133.177	0.89857	0.0363032	U	NO
Chuk	305.767	0.898167	3.19e-05	U	NO
Pmm1	278.254	0.89766	3.47e-05	U	NO
Szrd1	219.342	0.897275	9.03e-05	U	NO
Arpp19	608.039	0.896505	2.2e-08	U	NO
Gm26944	28.5404	0.895143	0.0236034	U	NO
Mmadhc	253.942	0.894284	2.05e-07	U	NO
Prkaca-ps1	40.5516	0.893837	0.00754637	U	NO
Slc35a4	612.179	0.893755	8.36e-06	U	NO
Ptrh2	155.89	0.893513	9.89e-08	U	NO
Bloc1s3	34.7093	0.893387	0.00913235	U	NO
Lpin2	92.3453	0.892815	4.82e-06	U	NO
mt-Nd1	1.20188e+06	0.892589	8.92e-05	U	NO
Adra1a	239.795	0.892566	0.0190061	U	NO
Romo1	330.656	0.891879	2.93e-07	U	NO
Rrm1	127.73	0.891439	1.21e-05	U	NO
Fdxacb1	126.417	0.8911	5.13e-07	U	NO
Mrpl35	610.689	0.890961	2.98e-05	U	NO
Atox1	1024.98	0.890182	3.47e-05	U	NO
Gm12097	39.7968	0.886758	0.00253672	U	NO
Rreb1	698.901	0.886242	0.000887762	U	NO
Nsun4	306.141	0.885775	1.18e-08	U	NO
Gm14584	25.8155	0.885755	0.0082737	U	NO
Tbc1d20	1846.86	0.885212	7.42e-08	U	NO
Lhfpl2	26.7675	0.884996	0.0198483	U	NO
Mgst1	5392.85	0.884791	1.81e-12	U	NO
Xpnpep1	243.803	0.884635	1.75e-11	U	NO
Gm44777	17.6678	0.88402	0.0415826	U	NO
Trub2	77.5441	0.883021	4.13e-05	U	NO
Srebf1	844.819	0.882876	0.00822556	U	NO
Elavl1	878.079	0.882632	8.53e-11	U	NO
Med27	74.6671	0.881421	0.000193469	U	NO
Sh3pxd2a	1614.4	0.881376	0.0125118	U	NO
Trir	319.663	0.881018	0.000455971	U	NO
Eif5al3-ps	145.54	0.880387	4.24e-05	U	NO
Mkln1os	31.2356	0.880362	0.00888777	U	NO
Hoxb6	26.2377	0.880189	0.0444652	U	NO
Hmox2	595.928	0.879236	1.14e-09	U	NO
Zfp335os	14.8375	0.878932	0.0446644	U	NO
Pck1	11543.6	0.878313	1.04e-06	U	NO
Ciapin1	560.256	0.877901	0.000138122	U	NO
Nfyc	110.798	0.877738	0.0256843	U	NO
1700021F05Rik	358.698	0.877611	2.85e-08	U	NO
Cmpk1	679.1	0.877536	3.21e-07	U	NO
Pdss2	184.946	0.877176	5.61e-07	U	NO
Acadm	6486.58	0.877104	4.39e-10	U	NO
Eif4g2	4159.38	0.876372	4.96e-14	U	NO
Nudt12	384.954	0.876073	0.000271308	U	NO
Mindy3	149.568	0.875143	0.00754637	U	NO
Usmg5	957.365	0.874589	0.0033229	U	NO
Fam107a	55.0273	0.874264	0.0119842	U	NO
Akr1b8	159.206	0.873823	0.0001038	U	NO
Rtel1	100.584	0.873804	2.1e-05	U	NO
Cbr4	321.946	0.873693	0.000114072	U	NO
Dusp6	431.537	0.873566	0.00257181	U	NO
Unc119b	110.697	0.873057	1.22e-06	U	NO
Aasdhppt	252.418	0.872364	7.31e-05	U	NO
Jtb	267.692	0.871635	1.58e-10	U	NO
Pdpr	56.702	0.871568	0.0158129	U	NO
Plpp6	783.812	0.871079	1.77e-11	U	NO
Ywhab	1641.44	0.870167	1.02e-07	U	NO
Nhej1	29.1899	0.870146	0.0135567	U	NO
Alg9	244.239	0.870046	1.08e-07	U	NO
Arhgap19	41.9046	0.869451	0.0142808	U	NO
Gm6768	172.068	0.86938	0.00147936	U	NO
Lurap1	370.78	0.869343	0.000470305	U	NO
Gtf3c3	98.4067	0.869262	0.000771874	U	NO
Tmem14c	1635.87	0.867744	4.01e-09	U	NO
Caprin1	793.486	0.867663	8.8e-08	U	NO
Cops3	1063.8	0.867564	3.39e-08	U	NO
Gm5391	37.3974	0.867546	0.00948768	U	NO
Tmem167	397.865	0.867046	3.25e-07	U	NO
Ptprd	383.265	0.865653	1.92e-05	U	NO
Asna1	450.704	0.865012	1.1e-05	U	NO
Zwint	1194.93	0.86496	1.5e-09	U	NO
Gnb5	190.573	0.864702	7.56e-10	U	NO
Ccl9	46.6919	0.864587	0.0217892	U	NO
Gm21399	504.636	0.864364	0.0101966	U	NO
Gm12734	15.0937	0.864315	0.0436325	U	NO
Pex3	509.04	0.864261	2.33e-06	U	NO
Miga2	568.329	0.862915	8.86e-07	U	NO
Aifm1	408.436	0.862373	7.76e-06	U	NO
Sik2	680.22	0.862332	0.00110589	U	NO
C130074G19Rik	298.035	0.862278	0.000381058	U	NO
Snrnp35	27.4615	0.862274	0.00594435	U	NO
Commd2	69.4694	0.861995	3.01e-05	U	NO
Myo5a	471.666	0.861534	5.98e-09	U	NO
Hoxc6	224.689	0.860808	4.32e-06	U	NO
Pam16	55.0296	0.860647	0.00328935	U	NO
Vps33a	240.113	0.860474	5.51e-11	U	NO
Pex7	333.998	0.859922	7.84e-09	U	NO
Tysnd1	1434.43	0.859594	0.00400977	U	NO
Dnajc19-ps	302.311	0.857111	3.72e-05	U	NO
Sacm1l	721.427	0.856169	1.57e-06	U	NO
Gpat3	230.382	0.855799	0.000103313	U	NO
Eif4e2	479.398	0.855304	7.01e-12	U	NO
Avpi1	55.7039	0.85507	0.00905102	U	NO
Atp5l2-ps	75.8282	0.85463	0.0125276	U	NO
Gm46379	212.252	0.854151	5.53e-08	U	NO
Gm37784	144.287	0.85407	0.0454983	U	NO
Mrpl58	281.97	0.853934	6.62e-08	U	NO
Gm9905	64.4804	0.853321	0.00136616	U	NO
Sppl2b	50.7511	0.852894	0.00892438	U	NO
Chpt1	8463.21	0.85282	0.000485335	U	NO
Myl9	714.15	0.852482	1.85e-07	U	NO
Eng	1295.42	0.852454	8.6e-05	U	NO
Cidea	7883.96	0.852293	0.00021065	U	NO
Sgpl1	930.89	0.852254	8.18e-06	U	NO
Tsen2	51.6606	0.851456	0.00062487	U	NO
Tmem251	170.464	0.851456	8.3e-05	U	NO
Adrb3	1156.02	0.85105	0.00763973	U	NO
Lpin1	6655.78	0.850581	1.19e-06	U	NO
Diablo	133.693	0.850451	3.36e-05	U	NO
Gm5867	28.6429	0.850401	0.0172635	U	NO
Emc7	993.05	0.849468	3.47e-07	U	NO
Apoo-ps	941.678	0.848515	3.65e-05	U	NO
Tm6sf1	161.776	0.848493	6.88e-07	U	NO
Lrp10	593.355	0.848449	0.000108685	U	NO
Fam45a	287.44	0.847653	1.9e-08	U	NO
Gm2199	841.339	0.847571	0.000135545	U	NO
Ssu72	687.084	0.847419	9.18e-16	U	NO
Mta3	204.924	0.846535	2.21e-06	U	NO
Chordc1	255.614	0.84652	0.00519557	U	NO
Insyn1	26.3397	0.846487	0.0172345	U	NO
Cptp	86.9173	0.846462	1.8e-05	U	NO
Fez2	325.833	0.846357	3.38e-07	U	NO
Gm9790	193.097	0.84619	0.00201515	U	NO
Fam104a	138.714	0.846151	7.5e-05	U	NO
Pyurf	976.502	0.846117	1.15e-05	U	NO
Plxna2	334.805	0.845866	6.27e-11	U	NO
4930519F09Rik	131.004	0.845824	0.0013859	U	NO
Gadd45g	284.507	0.845781	0.0021063	U	NO
Papola	893.806	0.845682	3.81e-10	U	NO
Nudt1	50.5816	0.845378	0.0124926	U	NO
Dhrs4	454.015	0.84408	4.09e-09	U	NO
Pamr1	27.9645	0.843273	0.0195517	U	NO
Minos1	3533.19	0.843188	2.13e-05	U	NO
Polr2l	69.584	0.842543	3.62e-05	U	NO
S100b	533.828	0.842344	0.0166011	U	NO
Bvht	31.8587	0.842266	0.00931156	U	NO
Rbx1	218.892	0.842027	8.27e-13	U	NO
Mfap5	34.4852	0.841619	0.022249	U	NO
Nfia	2264.84	0.841591	2.13e-17	U	NO
Abca1	1349.07	0.840846	0.000270944	U	NO
AW209491	133.188	0.840392	0.000220011	U	NO
Srp19	179.365	0.839734	3.25e-05	U	NO
Osbpl9	1181.12	0.839306	3.55e-07	U	NO
Grpel2	149.594	0.839088	4.76e-06	U	NO
Tatdn2	137.621	0.838265	0.00111176	U	NO
Mrpl44	265.196	0.837211	2.71e-06	U	NO
Ufsp1	56.4306	0.8372	0.011463	U	NO
1700066M21Rik	67.3203	0.837077	0.00714305	U	NO
Stoml2	224.175	0.836522	2.05e-08	U	NO
Ripply3	24.4186	0.836388	0.0151919	U	NO
Gbe1	2678.45	0.835948	0.00106603	U	NO
Hax1	36.1674	0.835612	0.00725209	U	NO
Cops9	3025.46	0.834664	3.6e-12	U	NO
Gm19503	275.116	0.83381	0.00041726	U	NO
Gm6304	74.8155	0.833393	0.000735088	U	NO
Ube2d2a	228.719	0.833335	6.74e-06	U	NO
Zfand6	1271.41	0.833097	3.72e-06	U	NO
Def8	112.76	0.83289	3.83e-06	U	NO
Psma2	434.764	0.832784	0.0415673	U	NO
Lig4	60.3427	0.832209	0.000825235	U	NO
Vac14	199.334	0.832036	1.19e-05	U	NO
Mfsd8	205.979	0.831683	2.01e-07	U	NO
Lzic	95.7145	0.831624	0.00738989	U	NO
Slx4ip	21.9091	0.831606	0.0415381	U	NO
Ndufa11	1310.24	0.830753	3.77e-07	U	NO
Gm30918	72.5657	0.830539	0.0123632	U	NO
Esrra	348.518	0.830476	0.000133221	U	NO
Gm20075	191.329	0.830281	5.69e-05	U	NO
Psmb3	309.503	0.83023	0.0084348	U	NO
Prdx1	1047.64	0.83011	1.45e-05	U	NO
Sephs2	1499.83	0.829886	0.000327893	U	NO
BC031181	498.521	0.829672	1.6e-09	U	NO
Lrrc39	325.749	0.829548	0.000439784	U	NO
Mbnl1	1458.76	0.829489	8.31e-07	U	NO
mt-Nd5	274952	0.8288	0.0144831	U	NO
BC003965	460.575	0.828192	2.17e-08	U	NO
1700056E22Rik	36.9569	0.827328	0.00305882	U	NO
Mrps17	1469.2	0.82714	6.53e-16	U	NO
C130013H08Rik	28.7159	0.827114	0.016915	U	NO
Tamm41	124.106	0.826691	0.000417835	U	NO
Usp8	811.512	0.826308	5.63e-10	U	NO
Pfdn4	102.125	0.825939	0.0046237	U	NO
Wdr46	26.7308	0.825168	0.0283419	U	NO
Gfm2	557.359	0.824913	1.58e-06	U	NO
Cct3	285.024	0.824839	3.69e-06	U	NO
Hp	2751.21	0.824228	0.00156664	U	NO
Wdr34	66.966	0.823397	7.97e-05	U	NO
Elovl5	1172.75	0.823365	1.64e-06	U	NO
Tmem267	58.0353	0.823143	0.0147128	U	NO
Nt5dc1	181.077	0.822615	0.00215158	U	NO
Ralgapb	564.612	0.822348	3.98e-18	U	NO
Gm9755	432.044	0.822193	1.45e-05	U	NO
0610012G03Rik	1400.82	0.82184	3.65e-12	U	NO
Poc1a	70.4756	0.821506	0.00112718	U	NO
Chchd2	1557.1	0.820502	5.21e-12	U	NO
Cnpy2	791.231	0.819799	3.96e-13	U	NO
Bloc1s4	73.9274	0.819658	0.00556856	U	NO
Gm11407	216.136	0.819338	0.003974	U	NO
Mrpl27	143.019	0.81912	0.000209908	U	NO
Phb2	1447.76	0.819096	3.17e-08	U	NO
Slc25a46	1279.17	0.818701	1.64e-05	U	NO
Gm14253	53.9227	0.818333	0.0019313	U	NO
Rnf217	125.302	0.817611	0.000539285	U	NO
Bzw1	1049.65	0.817209	7.97e-07	U	NO
Dag1	1803.88	0.816694	1.16e-06	U	NO
Dhx32	357.496	0.815846	1.32e-06	U	NO
Fxn	59.2316	0.815295	0.00079124	U	NO
Gm6560	221.276	0.8152	0.0184342	U	NO
Aig1	153.166	0.814158	1.87e-05	U	NO
Mrps7	999.082	0.813209	1.89e-17	U	NO
Bola3	1377.9	0.812666	1.22e-05	U	NO
Mocs2	434.103	0.811751	7.81e-06	U	NO
Wnt5a	114.691	0.811712	6.16e-05	U	NO
mt-Nd2	354776	0.810202	0.00817859	U	NO
Gm13771	325.768	0.809808	0.000748157	U	NO
Alg14	301.76	0.809787	8.51e-08	U	NO
Sugt1	413.46	0.809684	0.000431239	U	NO
Gm13835	339.003	0.808859	5.7e-05	U	NO
mt-Ti	2048.99	0.808249	0.00114678	U	NO
Lins1	65.862	0.807894	0.00337643	U	NO
Rbm45	48.0479	0.807843	0.0134387	U	NO
Cpped1	1070.77	0.807784	6.91e-15	U	NO
Mff	1082.33	0.807741	1.46e-10	U	NO
Rdh13	187.433	0.807336	0.000293938	U	NO
Slc2a9	24.4336	0.807005	0.0133182	U	NO
CT025601.1	33.201	0.806737	0.0239331	U	NO
Apobr	20.3392	0.806727	0.049125	U	NO
Usp10	196.651	0.806348	0.000147298	U	NO
Dph6	130.708	0.805535	1.03e-05	U	NO
C9orf72	335.723	0.804516	6.13e-05	U	NO
Gm10698	139.516	0.804319	0.0157945	U	NO
Scara5	95.1939	0.804261	0.0257823	U	NO
Pop5	355.437	0.804248	1.77e-09	U	NO
Atpaf2	1324.03	0.804025	0.000374229	U	NO
Nudt5	286.322	0.80388	9.09e-07	U	NO
Clock	314.494	0.803609	1.82e-05	U	NO
Gm5514	515.738	0.8034	0.00379949	U	NO
Capn2	848.851	0.80247	3.41e-11	U	NO
Gm6457	53.9058	0.802215	0.0159962	U	NO
Gpx8	1326.39	0.802032	0.00301544	U	NO
Gm11598	143.97	0.801635	0.000189583	U	NO
Slc35b1	429.855	0.801518	8.92e-07	U	NO
Mrps10	108.401	0.800802	1.8e-06	U	NO
Hspa9	3575.25	0.800024	2.15e-08	U	NO
Sdhaf2	721.5	0.798466	8.05e-10	U	NO
Hif1a	1086.14	0.797175	4.24e-05	U	NO
C1galt1c1	94.8554	0.797023	0.000363524	U	NO
Mrps21	241.944	0.796175	0.0049035	U	NO
Gm5559	52.7186	0.79593	0.0270984	U	NO
Col12a1	102.157	0.795544	0.0296933	U	NO
Scd1	189616	0.795528	0.0116188	U	NO
Blmh	100.346	0.795086	0.00548185	U	NO
Spats2	141.02	0.794829	8.16e-06	U	NO
Eva1a	40.5314	0.793316	0.0386156	U	NO
Mrpl21	150.962	0.792889	0.000766514	U	NO
Ndufb5	8191.37	0.792765	2.46e-07	U	NO
Gm13127	55.9217	0.792181	0.0102022	U	NO
Gm6275	50.4472	0.792147	0.0190036	U	NO
Cyp2u1	845.743	0.791978	1.84e-06	U	NO
Ssbp1	57.43	0.791249	0.00765348	U	NO
Slc2a12	31.643	0.791166	0.0421722	U	NO
Fkbp5	78.3126	0.790641	0.0338404	U	NO
Hadha	10115.4	0.790606	0.000354687	U	NO
Wrap73	20.7701	0.790065	0.0330378	U	NO
Kmt5a	770.967	0.789591	1.16e-06	U	NO
Rbpms2	1406.05	0.789148	5.92e-08	U	NO
Mrpl57	406.422	0.788855	5.91e-08	U	NO
Anxa1	88.5411	0.788795	0.0198153	U	NO
Sigmar1	291.579	0.788701	4.22e-06	U	NO
Myo19	156.875	0.788531	3.7e-05	U	NO
Gm9144	201.177	0.788342	0.000366712	U	NO
Minpp1	91.3224	0.788161	3.07e-05	U	NO
Prkar2b	12154.4	0.787748	9.55e-05	U	NO
Eif4e	215.857	0.787725	0.0390154	U	NO
Arl6ip4	174.742	0.786207	7.21e-07	U	NO
Ahsa1	104.062	0.785445	0.000179663	U	NO
Gm12940	74.5498	0.785438	0.0418941	U	NO
Vldlr	1234.5	0.785402	0.000152385	U	NO
Ginm1	3340.19	0.785166	8.68e-12	U	NO
Foxk2	195.557	0.785139	7.47e-06	U	NO
Gm8930	20.0151	0.784798	0.0454983	U	NO
Gm26534	21.5346	0.784782	0.0286973	U	NO
Gm11451	228.555	0.784461	0.00051041	U	NO
1500015A07Rik	21.7408	0.784281	0.0440737	U	NO
Tmem161b	130.358	0.783515	0.000227743	U	NO
Nqo1	31.6044	0.783231	0.0494534	U	NO
Slc25a32	322.107	0.783137	3.69e-05	U	NO
Zdhhc5	582.945	0.782155	0.000125555	U	NO
Cox16	53.4924	0.782012	0.00440326	U	NO
Qdpr	877.574	0.781964	1.19e-08	U	NO
Smim8	263.627	0.781707	0.00010058	U	NO
Ccnq	119.474	0.780121	0.000539285	U	NO
BC028528	192.648	0.779998	0.01972	U	NO
Ankrd24	42.6932	0.779668	0.0075512	U	NO
Ltv1	116.161	0.7796	5.4e-05	U	NO
Gm14845	106.329	0.779259	0.00379799	U	NO
Ccnc	164.803	0.778598	0.00282587	U	NO
Ldhb	1912.07	0.778143	3.9e-05	U	NO
Cox7a1	2000.44	0.777891	5.91e-05	U	NO
Fbxo9	380.402	0.777621	8.21e-10	U	NO
Ttc13	314.68	0.77722	2.33e-07	U	NO
Sdhd	3707.57	0.777216	6.25e-06	U	NO
Eef1e1	300.688	0.777137	1.21e-07	U	NO
Metap1	235.824	0.777116	4.75e-09	U	NO
Piezo1	267.596	0.776518	0.0234749	U	NO
Hint1	1226.37	0.77645	1.28e-05	U	NO
Il1r1	115.756	0.774679	2.68e-05	U	NO
Dennd4a	210.363	0.774545	2.21e-06	U	NO
Immp1l	152.696	0.774384	0.00969105	U	NO
Pctp	181.57	0.77429	0.000114072	U	NO
Acad11	2059.85	0.774211	3.7e-06	U	NO
Mllt1	204.678	0.774148	0.0104772	U	NO
Fdx1	291.477	0.77404	3.07e-05	U	NO
Ccdc32	71.5004	0.774011	0.00049087	U	NO
Ncbp2	195.87	0.773602	7e-06	U	NO
Thumpd3	104.867	0.77317	0.00145822	U	NO
Gins4	134.081	0.77293	0.00353072	U	NO
Twf1	509.215	0.771892	4.15e-10	U	NO
D8Ertd738e	410.617	0.771254	0.00035285	U	NO
Insr	735.385	0.771186	1.36e-09	U	NO
Gclm	449.993	0.770571	2.03e-06	U	NO
Mto1	313.032	0.770471	4.21e-05	U	NO
Bnip1	97.7041	0.768695	0.00283025	U	NO
Polr2g	124.106	0.76869	1.84e-06	U	NO
Ralgps1	75.2454	0.767647	0.00357295	U	NO
Tomm20	160.134	0.767375	0.00013606	U	NO
Slc36a1	165.109	0.765971	4e-05	U	NO
Impa1	451.927	0.765407	2.79e-06	U	NO
Gm13675	45.6421	0.765384	0.0172291	U	NO
Dlst	4139.95	0.764894	1.4e-05	U	NO
A430005L14Rik	40.2658	0.764589	0.00394567	U	NO
Exoc3	287.807	0.764326	1.66e-08	U	NO
Ndufv2	4012.23	0.764117	2.48e-07	U	NO
Ube4a	811.567	0.764077	4.43e-06	U	NO
Mgst2	32.5749	0.763892	0.0152296	U	NO
Clptm1	643.097	0.763678	0.000465364	U	NO
Polrmt	126.312	0.763674	0.000591253	U	NO
Psmb2	1479.76	0.763584	1.72e-08	U	NO
Malat1	3542.87	0.763258	0.0437702	U	NO
Usp16	286.788	0.762115	0.000439784	U	NO
Kctd1	237.293	0.761697	1.56e-05	U	NO
Dhx58	44.5509	0.759878	0.0165974	U	NO
Nova1	40.0805	0.759739	0.0160271	U	NO
Psmc2	494.617	0.759588	8.99e-05	U	NO
Uhrf1bp1l	251.846	0.759282	5.47e-05	U	NO
Atg13	260.691	0.758807	1.58e-06	U	NO
Etfrf1	2665.86	0.758236	0.000636653	U	NO
Rft1	121.524	0.75797	4.89e-05	U	NO
Ide	2315.72	0.757816	0.0103921	U	NO
Gja5	23.5697	0.757689	0.0444459	U	NO
Ei24	1232.81	0.757315	1.75e-09	U	NO
Rpe	401.141	0.757202	0.0004716	U	NO
Coq5	639.398	0.755285	1.04e-12	U	NO
Prdm16	139.084	0.755249	8.28e-06	U	NO
Mpi	184.044	0.754732	1.51e-05	U	NO
Dip2a	276.028	0.754413	3.16e-06	U	NO
Lrrc8b	73.4585	0.754407	0.00234316	U	NO
Homer1	126.589	0.754333	0.00719175	U	NO
Icmt	117.865	0.754299	6.16e-05	U	NO
Api5	387.069	0.753599	8.66e-07	U	NO
Dnajc19	42.9041	0.753476	0.0108652	U	NO
Dnajb11	427.066	0.753152	5.21e-08	U	NO
Serhl	81.106	0.753044	4.98e-05	U	NO
Sdhaf3	146.273	0.752983	0.00246233	U	NO
Mrrf	187.068	0.752961	2.35e-06	U	NO
Acsf3	451.546	0.752387	8.32e-05	U	NO
Gtf2f2	62.2618	0.751259	0.0107958	U	NO
2310039H08Rik	488.074	0.751244	7.97e-06	U	NO
Dynll1	226.57	0.751121	0.000757651	U	NO
Tpbgl	121.778	0.750968	0.020351	U	NO
Tfam	459.991	0.750947	3.01e-05	U	NO
Mrpl54	520.907	0.750424	3.44e-05	U	NO
Pir	71.9349	0.750376	0.00894	U	NO
AK157302	187.122	0.750253	0.0043316	U	NO
Aars	267.467	0.750072	0.00130906	U	NO
Tmem183a	204.256	0.750038	7.77e-08	U	NO
Iba57	55.1917	0.749469	0.000870939	U	NO
Tmem9b	576.771	0.749458	2.41e-08	U	NO
Tmem29	58.4758	0.748893	0.00161622	U	NO
Elp5	481.139	0.748496	2.27e-06	U	NO
A130014A01Rik	28.8946	0.748411	0.0368101	U	NO
Riox2	91.5474	0.747304	0.00063676	U	NO
Atp5f1	4769.18	0.746984	0.000522702	U	NO
Rabif	362.217	0.746371	2.69e-07	U	NO
Slc25a3	6390.86	0.746247	5.08e-06	U	NO
Eif4a-ps4	670.985	0.746126	8.01e-05	U	NO
Ptges2	329.9	0.745437	0.00410074	U	NO
Cacul1	312.25	0.745168	9.18e-07	U	NO
B3glct	187.359	0.744829	0.000257705	U	NO
Hemk1	189.868	0.744791	0.0112775	U	NO
Ruvbl2	153.891	0.744692	6.77e-05	U	NO
Zbtb7b	457.177	0.744614	0.00901827	U	NO
Alg1	162.508	0.744561	0.0130813	U	NO
B230322F03Rik	29.6702	0.744555	0.0288243	U	NO
Snhg20	82.1266	0.744201	0.00563785	U	NO
Tspan15	210.977	0.744191	0.000760742	U	NO
Sptlc1	325.471	0.743782	1.41e-06	U	NO
Eif2b2	97.3806	0.743418	0.00087654	U	NO
Sphk2	126.523	0.743236	0.0087109	U	NO
Tmem192	274.629	0.741897	0.000327843	U	NO
Podxl	440.103	0.741835	2.07e-07	U	NO
Nrde2	39.8916	0.741203	0.0243933	U	NO
Bphl	299.051	0.741154	6.17e-05	U	NO
Txndc12	1141.99	0.740936	8.3e-09	U	NO
Ctsd	2913.18	0.740715	0.000214782	U	NO
Ndufaf7	282.991	0.740032	5.12e-07	U	NO
Mrpl18	510.204	0.739175	1.98e-06	U	NO
Triap1	170.766	0.739126	2.26e-05	U	NO
Bfar	676.703	0.739053	1.32e-07	U	NO
Ttc32	96.9824	0.738742	0.00585553	U	NO
Gm9774	402.951	0.738436	0.000171548	U	NO
Snrpert	99.5207	0.737974	0.0265553	U	NO
Prkaca	5558.4	0.737699	0.00142381	U	NO
Ppm1g	285.923	0.736424	0.000333164	U	NO
2810004N23Rik	81.0993	0.736371	0.014903	U	NO
Clpx	531.869	0.734915	0.000660026	U	NO
Eci2	687.212	0.734847	9.72e-05	U	NO
Mettl16	90.6456	0.734543	0.00131278	U	NO
Ccdc58	87.0591	0.734185	0.00442305	U	NO
Snhg3	253.59	0.734035	0.00144084	U	NO
Pcyox1	843.079	0.733643	0.00051481	U	NO
Ndufb1-ps	2354.51	0.733347	1.64e-05	U	NO
Gm7832	144.412	0.733106	0.00114005	U	NO
Fam213a	6081.36	0.732078	0.00110956	U	NO
Swi5	729.655	0.732064	6.55e-08	U	NO
Gm5778	36.4885	0.732041	0.0284307	U	NO
B4galt4	115.979	0.73131	8.34e-06	U	NO
Naxd	169.489	0.731254	1.29e-07	U	NO
Bop1	69.1368	0.73112	0.0109465	U	NO
Dph3	498.855	0.730951	9.57e-10	U	NO
Cln5	290.945	0.730924	9.4e-07	U	NO
Ndufc2	2505.98	0.730684	4.94e-07	U	NO
Gm5801	136.722	0.730111	1.32e-06	U	NO
Nif3l1	122.563	0.730067	2.56e-05	U	NO
Atp13a3	615.219	0.729926	0.000613286	U	NO
Selenoi	145.107	0.729884	0.00114458	U	NO
Rpn1	245.932	0.729613	1.69e-05	U	NO
Ndufs4	1121.99	0.729271	0.000341001	U	NO
Mmab	484.327	0.727745	4.78e-06	U	NO
Lactb	142.696	0.7275	0.000310892	U	NO
Ndufb2	153.804	0.727264	0.000194183	U	NO
Mapkap1	273.671	0.726068	2.28e-05	U	NO
Vamp8	476.86	0.725672	1.03e-07	U	NO
Med20	230	0.725666	0.000136473	U	NO
Txndc15	453.133	0.725609	1.91e-07	U	NO
Pno1	447.578	0.725484	0.00748009	U	NO
Nbn	131.592	0.725106	0.00131774	U	NO
Gabpa	568.199	0.724817	2.2e-05	U	NO
Abhd17b	247.679	0.723974	0.00023039	U	NO
Cln8	139.389	0.723527	0.000128315	U	NO
Arhgap24	138.105	0.723264	0.00126881	U	NO
Rps4l	365.598	0.723003	2.32e-05	U	NO
Rnf24	198.782	0.722938	0.00385327	U	NO
Uqcrh	6653.86	0.722611	8.83e-11	U	NO
Gm47595	85.8926	0.722436	0.00793688	U	NO
Ublcp1	59.0137	0.721695	0.00235125	U	NO
Timm29	440.493	0.721372	2.47e-09	U	NO
Pex11g	48.1762	0.721015	0.037387	U	NO
Ptpmt1	1164.95	0.719881	2.76e-05	U	NO
Fabp5	90.6367	0.719729	0.0123605	U	NO
Sav1	1075.52	0.719012	0.00300913	U	NO
Spred1	415.73	0.718434	2.25e-05	U	NO
Mmp28	65.0044	0.717648	0.0266005	U	NO
Arl4a	949.05	0.717482	0.00570975	U	NO
Afg1l	639.206	0.716784	1.87e-05	U	NO
Serp1	2130.96	0.716502	2.55e-05	U	NO
Car5b	938.647	0.716015	0.00548185	U	NO
Eid2b	65.3812	0.715661	0.00406219	U	NO
Sh3bgrl	1208.74	0.715281	0.0142915	U	NO
Emb	32.727	0.715249	0.0278201	U	NO
Syt7	119.336	0.714853	0.000604538	U	NO
Ero1l	94.1601	0.714672	0.00934666	U	NO
Mdh2	4362.41	0.713036	7.5e-05	U	NO
Mrc1	207.788	0.71248	0.00572367	U	NO
Immt	3006.02	0.712211	0.000754931	U	NO
Ap3s1	471.181	0.711883	3.29e-05	U	NO
Rhot2	748.928	0.711691	2.85e-06	U	NO
Eipr1	44.7799	0.711425	0.0131741	U	NO
Cd320	155.937	0.711382	2.2e-06	U	NO
Bpnt1	591.355	0.710392	1.51e-07	U	NO
Acadvl	4068.53	0.709922	0.00068977	U	NO
Arfgef2	550.98	0.709013	2.77e-06	U	NO
Itprid2	786.504	0.708368	0.000167547	U	NO
Nt5m	180.696	0.707255	3.87e-05	U	NO
Uqcrq	10494	0.706877	0.00172888	U	NO
Sgsm3	32.1528	0.706319	0.0357391	U	NO
Coq7	725.188	0.705803	3.8e-05	U	NO
Mrps26	78.8841	0.705609	0.000192394	U	NO
Nprl3	183.787	0.705447	0.000668655	U	NO
Gm15190	81.9279	0.705058	0.00723092	U	NO
Fgfr1op2	294.221	0.704307	0.000428242	U	NO
Urod	380.7	0.70425	2.82e-10	U	NO
Ciao1	234.649	0.704154	1.57e-06	U	NO
Picalm	1542.19	0.703458	0.0225322	U	NO
Ifi27	2886.7	0.702977	0.00169631	U	NO
Pex11a	527.236	0.70272	1.03e-10	U	NO
Abraxas1	141.107	0.702259	4.25e-05	U	NO
Cluh	1776.98	0.70138	3.09e-06	U	NO
Tbc1d7	139.369	0.70085	0.000585287	U	NO
Trmt5	118.018	0.700665	0.00444202	U	NO
Gmeb1	52.7186	0.700437	0.0078867	U	NO
Oxnad1	516.837	0.700421	0.00221168	U	NO
Ovca2	144.9	0.700199	0.000151192	U	NO
Gm8712	31.8304	0.699863	0.02185	U	NO
Mark3	371.576	0.699373	1.19e-05	U	NO
Fkbp2	409.916	0.699233	1.93e-05	U	NO
Mtmr9	286.778	0.699222	8.7e-05	U	NO
Hoxb2	53.3188	0.699131	0.0135447	U	NO
Mecr	1224.22	0.698712	1.17e-05	U	NO
Mapkapk2	966.63	0.698344	0.000156974	U	NO
Tsr3	22.9704	0.69728	0.0408225	U	NO
Gtpbp8	182.643	0.69707	5.21e-06	U	NO
Lamp2	1386.21	0.696994	6.46e-07	U	NO
Ints14	236.686	0.696044	9.36e-08	U	NO
Alg5	97.749	0.696028	1.93e-05	U	NO
Helq	26.3637	0.694609	0.0338699	U	NO
Cox7b	7168.37	0.694264	0.000862455	U	NO
Gramd3	166.018	0.693605	0.000607741	U	NO
Gt(ROSA)26Sor	107.395	0.693226	0.00477382	U	NO
Stard4	93.4252	0.692771	0.000264966	U	NO
Mrpl32	340.267	0.692655	6.01e-06	U	NO
Mosmo	208.558	0.69253	2.67e-06	U	NO
Pmpca	918.36	0.692113	1.99e-09	U	NO
Trmt12	60.4709	0.691878	0.0185152	U	NO
4921524J17Rik	44.8988	0.691538	0.00559431	U	NO
Vps53	118.981	0.690725	9e-05	U	NO
4930453N24Rik	341.962	0.690337	0.00150308	U	NO
Lekr1	52.1149	0.690079	0.0339397	U	NO
Mrpl34	1387.54	0.689819	4.22e-05	U	NO
Bola2	86.1152	0.689451	0.00387267	U	NO
Synj2bp	181.932	0.688338	7.37e-05	U	NO
Vti1b	391.94	0.688298	0.00031398	U	NO
B3gat3	90.6696	0.688113	0.010022	U	NO
Slc2a4rg-ps	39.8271	0.687955	0.0461851	U	NO
Naa38	492.391	0.687781	2.02e-07	U	NO
Bnip3l	393.378	0.687503	0.000532865	U	NO
Smim26	454.545	0.686792	7.35e-05	U	NO
Pgm1	2771.91	0.68678	2.06e-05	U	NO
Hnrnpab	1020.8	0.686741	2.2e-07	U	NO
Slc25a1	2510.77	0.686702	0.036532	U	NO
Tusc1	110.943	0.686159	0.000887353	U	NO
Idh1	1369.91	0.68607	0.000345328	U	NO
Pkm	2902.67	0.685397	0.00162798	U	NO
Tpst2	238.242	0.685349	6.75e-05	U	NO
Canx	2008.02	0.685213	0.000275132	U	NO
Lias	394.954	0.684421	2.07e-06	U	NO
Ctdnep1	325.947	0.68435	0.000660026	U	NO
Clpp	1345.9	0.683499	1.01e-07	U	NO
Cd1d1	705.067	0.682189	0.000508845	U	NO
1700052K11Rik	54.7164	0.682074	0.0430758	U	NO
Sec11a	275.238	0.681472	2.96e-06	U	NO
Rwdd4a	270.897	0.681092	6.25e-06	U	NO
Tbl1xr1	284.321	0.680983	0.000377716	U	NO
Rnf185	338.559	0.680538	0.000259872	U	NO
Tubg1	131.226	0.68043	0.00145823	U	NO
Ippk	64.3056	0.679587	0.00141139	U	NO
Emcn	351.436	0.679469	4.18e-08	U	NO
Orc4	221.788	0.679112	0.00226704	U	NO
Tmem258	104.272	0.678716	0.00379081	U	NO
Cox7c	132.929	0.67866	1.71e-05	U	NO
Rrn3	448.186	0.678446	7.49e-07	U	NO
Tmem184c	252.891	0.678243	0.00310235	U	NO
Apip	146.402	0.677641	4.37e-05	U	NO
Alg12	102.858	0.677419	0.000462513	U	NO
Rtn4	2058.83	0.677245	0.00931911	U	NO
Fbxo28	300.816	0.6768	1.7e-07	U	NO
BC002163	3222.07	0.676589	1.51e-07	U	NO
Galc	263.154	0.67623	0.000814665	U	NO
Phospho2	152.206	0.675989	0.00124102	U	NO
Mcat	189.689	0.675958	1.42e-05	U	NO
Pus1	50.7158	0.675917	0.0122508	U	NO
Hikeshi	305.655	0.675317	0.000411922	U	NO
Atp5j2	2469.38	0.675047	1.39e-06	U	NO
Mrps34	563.129	0.674339	1.93e-05	U	NO
Gm8539	92.5057	0.674247	0.0071682	U	NO
Ranbp1	126.75	0.674171	0.00105694	U	NO
Endog	381.653	0.673965	0.000443845	U	NO
H2afj	100.443	0.673939	0.0065626	U	NO
Bccip	436.409	0.673432	4.13e-06	U	NO
Fastkd1	226.575	0.673178	8.7e-05	U	NO
Erlec1	199.161	0.672725	1.31e-05	U	NO
Nlk	73.4268	0.671136	0.00150581	U	NO
Selenot	637.009	0.671037	0.00213427	U	NO
Tmem106b	1335.84	0.670025	0.000244366	U	NO
Nol7	151.685	0.669783	0.00606683	U	NO
Cisd2	640.772	0.669733	4.35e-06	U	NO
Nedd8	483.566	0.66934	0.000486653	U	NO
Zswim3	49.6723	0.668675	0.0337195	U	NO
Ap1m1	465.719	0.66866	0.00370153	U	NO
Mtx1	310.424	0.668505	0.00852845	U	NO
Zfp407	75.1664	0.668352	0.00360479	U	NO
Ebna1bp2	160.384	0.668088	0.000174971	U	NO
Kti12	132.495	0.668028	0.0163784	U	NO
Atp9a	205.718	0.667873	1.39e-05	U	NO
Ints7	249.051	0.667852	2.96e-06	U	NO
Tdpx-ps1	507.733	0.667647	0.00749462	U	NO
Itpa	70.2214	0.667347	0.0247945	U	NO
Wdr7	156.863	0.66724	0.000417152	U	NO
Gm12663	37.3563	0.666475	0.0198153	U	NO
Afg3l1	160.436	0.66606	0.00138814	U	NO
Smim10l1	1201.24	0.665879	0.00176469	U	NO
Trappc13	247.855	0.66584	0.000359324	U	NO
Acsl4	394.052	0.665582	0.00015214	U	NO
Tmco1	1995.55	0.665408	9.19e-06	U	NO
Saraf	582.18	0.665324	2.47e-09	U	NO
Txlng	439.416	0.665313	0.00940279	U	NO
Supt7l	218.284	0.664678	4.25e-05	U	NO
Ado	207.795	0.664511	1.71e-05	U	NO
1810010H24Rik	30.7235	0.664337	0.0439444	U	NO
Tbck	268.09	0.664246	6.81e-05	U	NO
Lamtor5	411.297	0.664015	4.5e-06	U	NO
Rnf10	1265.42	0.663755	5.84e-07	U	NO
Usp5	123.381	0.663522	0.0013181	U	NO
Txndc9	236.535	0.663293	0.000147104	U	NO
Gla	50.426	0.663099	0.00885093	U	NO
Ift81	71.419	0.662958	0.000936986	U	NO
Mrps36-ps1	466.317	0.662871	1.42e-05	U	NO
Isy1	103.188	0.66213	0.000123303	U	NO
Gm4353	40.5285	0.661946	0.0158839	U	NO
Rad23b	440.219	0.661176	4.63e-09	U	NO
Dcaf13	187.958	0.660949	0.00010581	U	NO
Nubp2	274.117	0.660733	5.29e-05	U	NO
Uqcr10	5138.17	0.660631	0.000686492	U	NO
Yars	137.975	0.660096	1.71e-05	U	NO
Farsb	282.624	0.659719	7.12e-06	U	NO
Gm6581	1854.62	0.659588	5.8e-11	U	NO
Rnase4	365.33	0.658935	0.000837074	U	NO
Pxmp4	924.089	0.658549	3.01e-05	U	NO
Ccar1	222.863	0.658311	0.000559963	U	NO
Pus10	381.789	0.658172	0.000702966	U	NO
Slc25a44	1554.31	0.657998	0.000358132	U	NO
Dnaja2	762.397	0.65748	0.000152851	U	NO
Gba	150.411	0.656353	0.000117483	U	NO
Pole4	202.611	0.655977	0.00383225	U	NO
Uchl4	110.24	0.65594	0.0361488	U	NO
Gm5900	31.3368	0.655777	0.0487207	U	NO
Socs6	175.642	0.655575	0.00332166	U	NO
Pex2	815.083	0.655515	4.05e-06	U	NO
Mlec	699.994	0.655393	0.000424204	U	NO
Jagn1	215.758	0.655355	9.99e-07	U	NO
Cmtm4	1091.95	0.654543	1.42e-05	U	NO
Nars2	113.135	0.654506	0.000398176	U	NO
Mrpl33	376.917	0.654126	0.0012812	U	NO
Marc2	746.058	0.654121	2.01e-06	U	NO
Slc30a6	159.075	0.654026	1.57e-06	U	NO
Tcf12	377.068	0.654014	8.08e-07	U	NO
Coa4	71.3202	0.653394	0.00442242	U	NO
Cyhr1	644.978	0.653385	5.32e-08	U	NO
Prdx3	8294.97	0.653344	2.3e-07	U	NO
Larp7	59.2273	0.653195	0.00668323	U	NO
C330018D20Rik	262.288	0.65305	0.00270961	U	NO
Zfand2a	88.1036	0.652748	0.000823498	U	NO
Sepsecs	194.851	0.65257	0.000369555	U	NO
Gm7936	135.859	0.652446	0.0186644	U	NO
S100a13	1422.49	0.651946	9.91e-06	U	NO
Mrps14	530.454	0.651883	1.25e-06	U	NO
Rpl17	28.2424	0.651566	0.0437881	U	NO
Gm12168	32.1871	0.651463	0.0475649	U	NO
Mylk	438.283	0.651059	2.45e-06	U	NO
2700097O09Rik	151.002	0.650764	0.0316812	U	NO
Eif2s3y	265.638	0.649839	0.00436328	U	NO
Rnf149	63.3117	0.649394	0.0116188	U	NO
Pbdc1	98.8327	0.649176	0.00588428	U	NO
Commd1	143.232	0.649029	0.00346415	U	NO
Samm50	537.753	0.648935	2.85e-05	U	NO
Elob	314.611	0.648901	0.000147513	U	NO
Slc35a1	101.517	0.648877	0.000826533	U	NO
Gtf2h5	301.66	0.648859	3.11e-06	U	NO
Zfp930	133.414	0.648499	0.0310316	U	NO
Iars	88.7739	0.648171	0.00529517	U	NO
Tmem126b	284.822	0.647864	0.000138561	U	NO
Apool	362.522	0.647809	0.00043561	U	NO
Sirt5	131.186	0.647457	0.00728304	U	NO
Ccdc107	93.7726	0.647282	0.00711365	U	NO
Bpgm	174.101	0.647005	0.00111494	U	NO
Fn1	122.569	0.646542	0.0157945	U	NO
Gcnt2	134.865	0.646335	0.0252442	U	NO
Gm16437	261.598	0.646275	1.7e-05	U	NO
Acbd4	183.028	0.645958	0.00543332	U	NO
Kif3b	160.749	0.645722	0.00156895	U	NO
Gm26782	39.8304	0.645289	0.0270458	U	NO
Zfp560	79.7499	0.645225	0.00303605	U	NO
Gadd45gip1	346.014	0.645067	0.000269408	U	NO
6430550D23Rik	43.4202	0.644876	0.011549	U	NO
Oaz1-ps	647.665	0.644139	0.0125124	U	NO
Xpnpep3	169.859	0.64358	0.000855953	U	NO
Ndufc1	1487.84	0.642753	0.000245226	U	NO
Eapp	165.891	0.642532	0.000996427	U	NO
Rdh14	165.905	0.642247	0.00128021	U	NO
Uqcc3	209.65	0.641864	0.0017186	U	NO
Wdr55	49.0927	0.641315	0.00732567	U	NO
Hoxc5	235.719	0.640888	0.0311804	U	NO
Cacybp	266.131	0.640477	0.00710818	U	NO
Ufd1	876.87	0.639905	8.33e-14	U	NO
Actr3	673.284	0.639762	0.0151794	U	NO
Kpna6	714.036	0.639152	6.57e-10	U	NO
Plin3	835.252	0.638537	0.000638352	U	NO
Hoxa5	854.716	0.638366	0.000151928	U	NO
Mterf4	245.073	0.638155	0.00139944	U	NO
Rab1b	1707.4	0.63812	0.00324836	U	NO
Creg1	725.147	0.637855	0.00224925	U	NO
Surf2	156.11	0.637757	5.79e-05	U	NO
Atp6v1c1	372.233	0.637486	1.91e-06	U	NO
Edf1	310.329	0.637416	0.000134947	U	NO
Nup50	259.606	0.637347	0.000796251	U	NO
Parvb	114.649	0.637318	0.0321341	U	NO
Kdm5c	176.527	0.636809	0.000494802	U	NO
Hsdl2	2965.76	0.63659	0.00591294	U	NO
Grsf1	2224.02	0.636523	2.43e-06	U	NO
Tomm7	612.79	0.635647	0.0217625	U	NO
Ttc39b	168.523	0.635603	3.59e-05	U	NO
2210408F21Rik	48.7471	0.634791	0.0142995	U	NO
Afg3l2	780.972	0.634553	2.55e-06	U	NO
Nxt1	53.1558	0.634256	0.00516233	U	NO
Lyrm1	93.329	0.634229	0.00183097	U	NO
Acot6	101.429	0.633872	0.00944391	U	NO
Bckdhb	805.532	0.63361	0.000455859	U	NO
Ptar1	378.664	0.63291	0.000373144	U	NO
Actr10	405.061	0.632354	3.24e-07	U	NO
Timm44	673.734	0.631594	5.86e-07	U	NO
Gm7436	121.003	0.631455	0.00894476	U	NO
Gm6419	590.252	0.631296	0.00496644	U	NO
Ppp2r5c	505.888	0.630945	6.78e-06	U	NO
Gm12396	156.647	0.630602	0.0138638	U	NO
Gm7859	299.836	0.630581	0.0253471	U	NO
Fam217b	236.273	0.630376	0.00179934	U	NO
Snrpd3	380.429	0.630203	0.000911295	U	NO
Mitd1	38.0547	0.629843	0.0316591	U	NO
Psmc5	240.812	0.629625	0.000432302	U	NO
Timmdc1	133.28	0.629571	0.000485564	U	NO
Psmd10	89.3536	0.629324	0.00953011	U	NO
Ndufs8	2733.07	0.629019	0.000145715	U	NO
Gm48067	2132.33	0.628874	0.0214963	U	NO
Cd99l2	558.254	0.628295	0.000128203	U	NO
C330007P06Rik	106.157	0.627776	0.0340868	U	NO
Aggf1	110.876	0.627618	0.000777876	U	NO
Atp6v0d1	797.094	0.627444	4.54e-05	U	NO
Gm11964	516.803	0.627359	1.52e-05	U	NO
Acta2	1062.66	0.626966	0.0035208	U	NO
Pfkfb3	4428.58	0.626606	0.0301362	U	NO
Abcb9	102.754	0.626182	0.018709	U	NO
Ppa1	957.019	0.626018	0.00460237	U	NO
Lyrm4	176.328	0.625369	0.00122788	U	NO
Isca1	1921.18	0.624976	0.00141631	U	NO
Fam98a	180.355	0.624494	0.00449622	U	NO
[truncated: 1,833 more rows]

## Sheet: Interaction
Gene	baseMean	log2FoldChange Interaction	adjpval interaction	TH direct target gene?
2010003K11Rik	171.968	-1.65311	0.0274934	YES
Acsl5	1598.14	-1.25915	0.0222584	YES
Alkbh7	119.679	-1.14346	0.00271946	YES
Alpl	307.821	-1.43075	0.00590901	YES
Ampd3	747.245	-1.07189	0.000686797	YES
Apln	36.173	-1.81494	0.0478436	YES
Arhgef12	2263.21	-0.530651	0.033191	YES
Aspg	523.84	-1.41037	0.0148076	YES
Atp1a2	14303.7	-0.851752	0.000114337	YES
Bmp8b	324.078	-2.91779	0.00496459	YES
Ccnd1	75.0332	-2.10472	0.00674585	YES
Cend1	109.049	-1.96832	0.0464204	YES
Chchd10	6343.45	-0.948725	0.0458213	YES
Cnnm2	533.275	-1.12733	0.00471045	YES
Coa7	160.87	-0.993452	0.00496459	YES
Coq10a	719.928	-0.968556	0.0245138	YES
Cpn2	376.513	-1.07734	0.0280259	YES
Cux1	710.575	-0.755579	0.0233753	YES
Cyb561	22.0549	-1.49372	0.0297299	YES
Cyp2b10	648.091	-3.9227	0.0206578	YES
Cyth1	282.747	-0.837979	0.0456962	YES
Ddt	1971.55	-0.771462	0.00046034	YES
Dlg1	452.358	-0.793732	0.0158964	YES
Dnaja3	2181.34	-0.913189	0.00141968	YES
Dysf	176.221	-0.85276	0.0361817	YES
Egln1	2365.89	-1.36895	4.38e-07	YES
Elof1	623.788	-0.952089	0.0485156	YES
Ergic1	1265.53	-0.800587	0.0417324	YES
Faap100	59.0227	-1.44628	0.0485122	YES
Fabp3	769.943	-1.92856	0.00390634	YES
Fbxl2	21.1802	-1.70909	0.0474053	YES
Fbxo31	287.198	-0.807397	0.0446376	YES
Fgf1	302.04	-1.87701	0.00035505	YES
Fkbp4	348.601	-0.932399	0.00115581	YES
Gde1	2696.33	-1.28875	0.000174995	YES
Glrx5	988.378	-0.94645	0.00496459	YES
Glul	7989.77	-0.672008	0.0449627	YES
H13	379.483	-1.09466	0.00387548	YES
Hpdl	90.287	-1.85127	2.23e-05	YES
Idh3a	23703.8	-0.676383	0.0252689	YES
Il15ra	578.726	-0.965654	0.028483	YES
Isyna1	90.1067	-1.42672	0.0257111	YES
Itpk1	1146.38	-1.10053	0.0113847	YES
Kcmf1	1469.19	-0.552706	0.0233753	YES
Kif16b	177.171	-0.941095	0.0423458	YES
Ldlrap1	263.341	-0.7889	0.0323886	YES
Letm1	1871.5	-1.03264	0.000762562	YES
Lgr6	609.833	-1.22455	0.0206578	YES
Lmf1	234.15	-1.10796	0.00899477	YES
Loxl1	326.901	-1.12807	0.0354157	YES
Macf1	844.664	-0.931922	0.00251802	YES
Map2k3	367.864	-0.967273	0.0349373	YES
Mcee	1026.2	-1.17977	0.00496459	YES
Mgat4b	509.649	-0.739441	0.024522	YES
Mpnd	171.746	-0.751151	0.00645458	YES
Mpv17l2	380.505	-0.889277	0.0206578	YES
Mrpl36	661.452	-0.75633	0.0213605	YES
Mt1	8086.81	-1.40733	0.0113435	YES
Myo18a	328.873	-1.04666	0.00037291	YES
Nenf	522.446	-1.30957	4.44e-07	YES
Notch4	186.904	-0.859092	0.0455342	YES
Ogdh	20805.8	-0.857715	0.0152802	YES
Pald1	254.796	-1.05407	0.0358107	YES
Pcsk6	840.115	-1.20644	4.12e-05	YES
Perm1	185.053	-1.75951	0.0323149	YES
Pgpep1	373.15	-1.08826	5.36e-05	YES
Pkn1	1443.86	-1.00571	0.0408619	YES
Pla2g12a	1558.01	-0.917432	7.47e-07	YES
Ppargc1a	513.939	-1.37927	0.0407203	YES
Ppargc1b	329.93	-0.8535	0.0332638	YES
Proca1	491.425	-1.27102	1.46e-07	YES
Ptgds	91.4608	-2.20897	0.0245085	YES
Qrsl1	160.809	-0.738916	0.0305571	YES
Rab34	262.575	-1.39867	0.00269311	YES
Rbck1	534.239	-0.743317	0.02735	YES
Rgl3	166.203	-1.25797	0.035015	YES
Rilp	232.752	-1.55738	5.58e-05	YES
Rom1	43.0458	-2.34117	0.000242236	YES
Rpl13a	79.5393	-1.24644	0.0485091	YES
Scyl1	306.891	-0.847587	0.00996811	YES
Sirt3	290.889	-1.17235	0.001929	YES
Slc26a6	47.9473	-1.47675	0.01589	YES
Slc29a1	942.857	-1.41278	0.0197976	YES
Slc2a4	2661.36	-0.824984	0.0412294	YES
Slc39a14	229.519	-1.13228	0.00939186	YES
Slc7a6	579.874	-1.1083	0.00668337	YES
Smarcd1	600.994	-2.12578	0.000114337	YES
Snta1	186.346	-1.30635	0.00282594	YES
Sorbs3	767.265	-1.14267	0.0270743	YES
Tecpr1	342.922	-0.914154	0.00392454	YES
Timp4	1033.06	-1.1335	0.0055898	YES
Tinagl1	841.588	-1.19926	0.028483	YES
Tpra1	135.255	-0.976971	0.0135764	YES
Trim67	152.248	-1.79679	4.07e-05	YES
Ttc38	215.895	-1.31972	0.00167285	YES
Tuba8	459.773	-1.14683	0.0101275	YES
Txn2	6222.17	-1.04164	0.0149282	YES
Uck2	166.166	-0.932343	0.00901404	YES
Uqcc2	125.433	-0.998237	0.0257111	YES
Vegfa	2797.38	-0.863232	0.0353653	YES
Xrcc6	1164.62	-1.09065	0.000624048	YES
Yif1b	304.628	-1.32127	0.000211454	YES
Zfp691	127.852	-1.05367	0.0024229	YES
R3hdm2	1245.22	-0.404522	0.0455342	NO
Usp24	653.3	-0.433334	0.0206578	NO
Gm6581	1854.62	-0.439844	0.038083	NO
Carhsp1	1263.83	-0.454698	0.0279588	NO
Rab22a	540.729	-0.456186	0.0275608	NO
Irak1	1264.39	-0.463731	0.0118064	NO
Tcf25	1299.59	-0.477811	0.0438984	NO
Calm1	4706.8	-0.492291	0.029072	NO
Wnk1	1012.19	-0.497206	0.0350631	NO
Ist1	801.373	-0.501804	0.0305571	NO
Chchd2	1557.1	-0.506413	0.0450405	NO
Atp5b	25539.1	-0.508122	0.0131312	NO
Chmp4b	1194.04	-0.514067	0.0485122	NO
Ndufa9	2343.22	-0.532002	0.0362852	NO
Mrpl11	372.805	-0.53218	0.0362852	NO
Epas1	4210.3	-0.534093	0.0211869	NO
Ralgapb	564.612	-0.534455	0.00649365	NO
Clpb	679.632	-0.535447	0.0394462	NO
Ndufv3	3543.14	-0.541926	0.0320215	NO
Clpp	1345.9	-0.542094	0.0432181	NO
Ei24	1232.81	-0.562244	0.0323886	NO
Lman2	2121.1	-0.563243	0.0438984	NO
Tmem9b	576.771	-0.565514	0.0449627	NO
Uqcrh	6653.86	-0.570121	0.012533	NO
0610012G03Rik	1400.82	-0.583773	0.0179902	NO
Dennd5a	1911.77	-0.584395	0.0115454	NO
Pccb	2173.17	-0.585441	0.0280259	NO
Tmbim6	4668.35	-0.585497	0.00932263	NO
Ndufa1	2685.87	-0.591402	0.028483	NO
Naa38	492.391	-0.599672	0.0277479	NO
Ppme1	486.692	-0.602029	0.0290735	NO
Sec31a	1467.79	-0.613599	0.0144262	NO
BC004004	1482.26	-0.620031	0.0436875	NO
Timm13	671.666	-0.6222	0.0325159	NO
S100a13	1422.49	-0.627873	0.0368238	NO
Usp40	280.558	-0.627914	0.0332256	NO
Gm44386	666.051	-0.628498	0.0118268	NO
Coq9	2158.34	-0.628872	0.0173316	NO
Ndufb7	2291.2	-0.629283	0.00665181	NO
Nde1	264.618	-0.632801	0.0258586	NO
Gm11964	516.803	-0.633191	0.0323149	NO
Cyb5r1	396.325	-0.636351	0.0243634	NO
Mrps27	253.323	-0.639512	0.0373964	NO
Sdhb	3913.29	-0.643391	0.00961202	NO
Galt	240.422	-0.643765	0.0456962	NO
Timm44	673.734	-0.643929	0.011329	NO
Trappc2l	653.858	-0.646807	0.0102196	NO
Uqcc1	1032.59	-0.647426	0.0303455	NO
Mprip	1115.34	-0.647472	0.0148076	NO
Mrps34	563.129	-0.650118	0.0449627	NO
Wbp2	1353.24	-0.650833	0.0248783	NO
Rbx1	218.892	-0.651314	0.00697168	NO
Mtor	1308.3	-0.651504	0.0215284	NO
Nfs1	339.648	-0.659817	0.0490701	NO
Stoml2	224.175	-0.66095	0.0326455	NO
Aldh4a1	516.454	-0.662249	0.00387548	NO
Dph3	498.855	-0.663206	0.0055898	NO
Cd320	155.937	-0.665065	0.0324737	NO
Snap47	224.047	-0.667145	0.0464204	NO
Mrps24	909.295	-0.670405	0.0284072	NO
Tomm22	490.449	-0.67144	0.0211869	NO
Tacc1	2426.48	-0.67407	0.018295	NO
Brap	426.456	-0.674483	0.0153221	NO
D10Jhu81e	2358.07	-0.683244	0.0442829	NO
Slc11a2	346.915	-0.685089	0.00201161	NO
Ap2a2	642.874	-0.685967	0.0164735	NO
Gm9803	1651.3	-0.689156	0.037169	NO
Tmem242	875.053	-0.68973	0.0130375	NO
Stx18	302.971	-0.691227	0.0055898	NO
Mrpl14	670.806	-0.69433	0.0149197	NO
Ndufb4	872.344	-0.697707	0.0196751	NO
Fbxw5	517.173	-0.698954	0.0212646	NO
Pop5	355.437	-0.701264	0.00975677	NO
Elob	314.611	-0.701368	0.042793	NO
Vipas39	282.49	-0.702222	0.0446376	NO
Mtfp1	489.121	-0.70238	0.0278463	NO
Thap4	175.779	-0.704838	0.0410494	NO
Aldh7a1	197.925	-0.705805	0.0362852	NO
Gm4707	1285.51	-0.707456	0.0474533	NO
Fkbp8	328.315	-0.7087	0.0474533	NO
Cops9	3025.46	-0.711366	0.00271946	NO
Atp5mpl	856.717	-0.711801	0.0184009	NO
Ubl7	491.283	-0.714751	0.0451433	NO
Trib2	151.891	-0.715785	0.035015	NO
Sgta	828.95	-0.718413	0.0229525	NO
Tspan3	1232.78	-0.720172	0.00690877	NO
Cox4i1	14790.5	-0.722026	0.0423458	NO
Mrpl58	281.97	-0.723022	0.0270743	NO
Dhrs7b	686.278	-0.724196	0.0409849	NO
Dnlz	285.754	-0.724673	0.0312961	NO
B4galt4	115.979	-0.725271	0.0312961	NO
Vrk3	178.205	-0.726686	0.0327668	NO
2310039H08Rik	488.074	-0.728702	0.0342495	NO
Ciao2b	320.405	-0.729874	0.0258874	NO
Rps4l	365.598	-0.731263	0.0359486	NO
Tesk1	478.526	-0.734311	0.0359486	NO
Rgcc	1967.63	-0.73451	0.0178139	NO
Cyp51	410.499	-0.735453	0.0364189	NO
Cox19	1115.25	-0.736	0.0467708	NO
Mmab	484.327	-0.740063	0.0222227	NO
Babam2	397.204	-0.741913	0.0113516	NO
Dmac2	518.907	-0.744238	0.0335193	NO
Mrpl55	606.505	-0.746667	0.0208781	NO
Tmem11	521.807	-0.746675	0.0361629	NO
Acss1	1222.43	-0.747574	0.0105958	NO
Ykt6	290.772	-0.748888	0.0248783	NO
Txnrd1	710.801	-0.748952	0.0294256	NO
Ankrd13a	551.336	-0.751551	0.0149132	NO
Tmem177	151.124	-0.753029	0.028483	NO
Idua	129.899	-0.76509	0.0237077	NO
Pla2g7	641.545	-0.770813	0.0213605	NO
Ndufa3	4253.4	-0.77226	0.0114239	NO
Ubr4	875.324	-0.77572	0.00540525	NO
Otub1	277.974	-0.778388	0.00797336	NO
Tmem14c	1635.87	-0.778849	0.00912803	NO
Narfl	178.057	-0.779988	0.034691	NO
Leng1	234.469	-0.78146	0.0131536	NO
Timm50	422.285	-0.784616	0.0298514	NO
Ndufs8	2733.07	-0.785212	0.0165924	NO
Atp5e	4727.93	-0.78619	0.00155226	NO
Coq8a	9291.91	-0.786216	0.0386109	NO
Myo19	156.875	-0.786383	0.0451433	NO
Cdipt	460.509	-0.78669	0.0255904	NO
Inpp5a	594.826	-0.786797	0.00118014	NO
Fmc1	1161.46	-0.788452	0.0306311	NO
Timm10b	375.72	-0.789375	0.0251394	NO
Ndufa13	1264.64	-0.789398	0.0361817	NO
Ap5s1	236.247	-0.789813	0.0474533	NO
Micu1	257.924	-0.79246	0.0405602	NO
Afg1l	639.206	-0.79312	0.018295	NO
Rufy1	106.425	-0.793182	0.0323149	NO
Reep5	4119.78	-0.794726	0.0359486	NO
Poldip2	1183.25	-0.796077	0.0151793	NO
Sdr39u1	975.775	-0.797351	0.0279081	NO
Fez2	325.833	-0.798185	0.018295	NO
Mast2	445.052	-0.801138	0.0325171	NO
Lpin1	6655.78	-0.802033	0.0254255	NO
Ppm1f	158.698	-0.80605	0.0323886	NO
Ndrg3	1862.48	-0.808238	0.0120827	NO
Coa3	801.616	-0.808429	0.0412294	NO
Rapgef5	502.517	-0.808926	0.024522	NO
Babam1	584.715	-0.812071	0.0055898	NO
Oxld1	172.579	-0.814792	0.0270743	NO
Adamts9	299.394	-0.818738	0.0381497	NO
Twnk	148.568	-0.820138	0.0184009	NO
Hcfc1r1	1916.57	-0.823084	0.0279081	NO
Mrpl52	240.512	-0.824994	0.036927	NO
Gimap4	263.624	-0.826589	0.0213605	NO
Pafah2	462.978	-0.82728	0.00104219	NO
Hmox2	595.928	-0.828832	0.00376166	NO
Dpm3	285.695	-0.829127	0.0323149	NO
Amigo1	100.174	-0.829221	0.0228054	NO
Aes	1661.97	-0.8327	0.0363128	NO
Cyc1	10994.7	-0.834073	0.00696541	NO
Wars2	106.245	-0.836204	0.0398617	NO
Timm10	460.144	-0.836756	0.0176122	NO
Mrpl12	676.473	-0.837477	0.0166995	NO
Park7	651.501	-0.838274	0.0150234	NO
Mpdu1	557.475	-0.840079	0.0102196	NO
Rusc1	194.652	-0.845175	0.0151877	NO
C1qtnf12	181.194	-0.845252	0.0487656	NO
Atat1	249.066	-0.84609	0.00686294	NO
Tmem41a	217.638	-0.846566	0.0401334	NO
Pex14	308.898	-0.848292	0.0296231	NO
Tmem147	2110.88	-0.848687	0.000331809	NO
Mrps18a	447.243	-0.855698	0.0010957	NO
Gys1	1809.98	-0.856573	0.00505073	NO
Rnf5	497.722	-0.858004	0.0107574	NO
Dhrs11	495.227	-0.861282	0.0298244	NO
Flnb	211.521	-0.861398	0.0349373	NO
Chmp6	101.855	-0.863479	0.0426175	NO
Cmc2	335.366	-0.863798	0.0450405	NO
Pcyt2	327.541	-0.864123	0.0279588	NO
Cox10	467.155	-0.864603	0.0122	NO
Pofut2	514.605	-0.865674	0.0450714	NO
Eif2b4	210.392	-0.867468	0.0130228	NO
Nt5m	180.696	-0.872124	0.0101408	NO
Timmdc1	133.28	-0.875341	0.0113847	NO
Fbxo44	177.056	-0.876713	0.00899477	NO
Mbd3	279.594	-0.876868	0.00685486	NO
Dnajc11	546.487	-0.877354	0.00653258	NO
Ndufa8	3160.3	-0.879123	0.00201441	NO
Lynx1	207.104	-0.880559	0.039161	NO
Cryz	213.905	-0.880658	0.0248783	NO
Ptdss2	480.749	-0.881607	0.0048798	NO
Cyp2u1	845.743	-0.882516	0.00697168	NO
Cox6b1	7786.47	-0.883844	0.0423458	NO
Oxct1	1759.48	-0.885299	0.0179902	NO
Rflnb	310.919	-0.886468	0.0190385	NO
Znhit2	94.2581	-0.886764	0.0284307	NO
Card19	622.62	-0.888099	0.00397311	NO
Emc10	1276.01	-0.891413	0.0188469	NO
Zer1	415.594	-0.895704	0.0166995	NO
Gnas	32246.7	-0.897066	0.0135764	NO
Hras	227.633	-0.899548	0.0119638	NO
Ndufb8	2538.1	-0.900238	0.00938754	NO
Dusp3	520.958	-0.902712	0.0102196	NO
Pcsk7	123.64	-0.903372	0.023953	NO
Uqcc3	209.65	-0.906509	0.0237975	NO
Atp1a1	321.871	-0.906717	0.0449627	NO
Otulin	181.007	-0.911176	0.0180607	NO
Fbxo6	165.614	-0.911607	0.0449627	NO
Tex264	581.945	-0.912061	0.0221769	NO
Atpaf2	1324.03	-0.91371	0.0446552	NO
Mrpl38	827.005	-0.913728	0.0081668	NO
Ehd3	84.3973	-0.915339	0.0340506	NO
Miip	93.9764	-0.915736	0.031738	NO
Pigyl	142.775	-0.91649	0.0367973	NO
Hsd17b7	229.497	-0.916575	0.0383077	NO
Ggnbp1	154.578	-0.918043	0.00141968	NO
Syngr1	171.594	-0.919945	0.00797336	NO
Lrp10	593.355	-0.920048	0.0373964	NO
Spg7	509.243	-0.921031	0.00387548	NO
Yars	137.975	-0.923715	0.00153055	NO
Rhot2	748.928	-0.923738	0.00141968	NO
Eml3	136.513	-0.924693	0.0238224	NO
Rmdn3	1300.64	-0.924848	0.0272932	NO
Rgl2	217.563	-0.927083	0.0323886	NO
Neurl4	171.656	-0.927384	0.0289966	NO
Fbxl6	114.552	-0.927922	0.0423458	NO
Slc25a39	2130.77	-0.931761	0.00682966	NO
Dpp7	82.7036	-0.933554	0.0284307	NO
Mgll	6234.68	-0.933844	0.00972004	NO
Strip1	301.021	-0.933858	0.0473682	NO
Abhd17a	262.299	-0.934335	0.0270743	NO
Dok4	103.144	-0.934388	0.047057	NO
Cenpb	676.827	-0.93453	0.00571552	NO
Col4a2	4055.88	-0.93682	0.0403079	NO
1110065P20Rik	125.951	-0.939191	0.0361817	NO
Pisd	83.9212	-0.939528	0.0201924	NO
Pmm2	555.082	-0.94352	0.00932263	NO
Arl2	195.424	-0.945637	0.0105958	NO
Cdh13	812.665	-0.946534	0.00899477	NO
2410015M20Rik	285.324	-0.946679	0.0114644	NO
Ccdc91	232.4	-0.946792	0.0325159	NO
Tbc1d22b	138.1	-0.946903	0.0361817	NO
Suds3	404.943	-0.948162	0.0255578	NO
Klhl26	219.56	-0.949833	0.00549315	NO
Atp6v1f	393.497	-0.950133	0.00549315	NO
Dhrs3	1417.92	-0.952249	0.025185	NO
Rapgef1	513.792	-0.953331	0.0351003	NO
Rnf8	68.4061	-0.954029	0.0330792	NO
Mrps23	701.366	-0.955812	0.00157902	NO
Msrb1	762.876	-0.959094	0.0257111	NO
Itpkb	592.231	-0.959171	0.044453	NO
Chrac1	144.845	-0.962867	0.0381497	NO
Pmm1	278.254	-0.96326	0.0284307	NO
Wwp2	75.3851	-0.963318	0.03884	NO
Gm5617	268.419	-0.970079	0.0192453	NO
Kctd2	232.286	-0.972078	0.0350631	NO
C030006K11Rik	551.127	-0.972136	0.0021004	NO
Cryzl2	67.8728	-0.972795	0.0436875	NO
Agpat3	3165.84	-0.973617	0.00463371	NO
Rab24	66.9432	-0.974645	0.0438272	NO
Pkm	2902.67	-0.979315	0.0211869	NO
Mtch1	992.742	-0.981832	0.00933459	NO
Ecsit	535.124	-0.986207	0.00899477	NO
Cox7a1	2000.44	-0.987478	0.0092623	NO
Uqcr10	5138.17	-0.987954	0.00808433	NO
Diablo	133.693	-0.990718	0.0144416	NO
Plpp1	395.207	-0.991391	0.0298244	NO
Ndufs7	5301.54	-0.991732	0.00226601	NO
Fmnl3	146.048	-0.998303	0.0449627	NO
Ubac1	346.311	-1.0034	0.00265248	NO
Acadvl	4068.53	-1.0046	0.0131536	NO
Ndufb2	153.804	-1.00918	0.00756109	NO
Ifi27	2886.7	-1.01267	0.0204598	NO
Sco2	109.093	-1.01295	0.0298244	NO
Flt4	119.236	-1.01391	0.0290387	NO
Acsf3	451.546	-1.01897	0.00585868	NO
Ltbp4	510.643	-1.01947	0.0373015	NO
Spr	152.192	-1.0248	0.00685486	NO
Aprt	75.2883	-1.02704	0.0442829	NO
AC122442.1	231.066	-1.03255	0.0204598	NO
Akr7a5	201.13	-1.03259	0.038083	NO
Eefsec	50.898	-1.03865	0.0231251	NO
Ntng2	105.497	-1.04565	0.0288203	NO
Grk3	605.049	-1.04591	0.0215318	NO
Kdr	1187.44	-1.04681	6.46e-05	NO
B9d2	70.5162	-1.04948	0.0490826	NO
Fuom	328.397	-1.05034	0.00157893	NO
Nipsnap1	161.512	-1.05268	0.0203056	NO
Phb	769.42	-1.0552	2.22e-05	NO
Fam234b	52.1172	-1.05533	0.044453	NO
Slc9a3r2	652.225	-1.05663	0.0317114	NO
Ldha	8223.25	-1.05736	0.0394462	NO
Nudt6	180.612	-1.06118	0.000954238	NO
Agrn	505.386	-1.06297	6.94e-05	NO
Hadha	10115.4	-1.07097	0.0130375	NO
Map2k3os	59.6407	-1.07401	0.012992	NO
Uqcr11	2072.14	-1.07614	0.0105958	NO
2022-09-09	518.821	-1.07685	0.0252463	NO
Prelid3b	1421.45	-1.08917	0.00665181	NO
Churc1	357.796	-1.09397	0.0449627	NO
Unc119b	110.697	-1.09691	0.00122789	NO
Hp	2751.21	-1.09947	0.0323149	NO
Ifi30	213.862	-1.10189	0.000144454	NO
Tbc1d9	62.137	-1.10674	0.0257111	NO
Aars2	120.501	-1.10737	0.00808433	NO
Rftn1	68.2332	-1.11106	0.028093	NO
Aldoa	26465.6	-1.11274	0.0395076	NO
Smad6	217.865	-1.11801	0.0252463	NO
Pbxip1	238.621	-1.12034	0.00157902	NO
Esrra	348.518	-1.12272	0.00781553	NO
Cdc34	235.203	-1.12424	0.03988	NO
Abcb9	102.754	-1.12917	0.0257111	NO
Mpzl3	72.5447	-1.13893	0.0261039	NO
Gm47595	85.8926	-1.14637	0.0263721	NO
Atf5	834.848	-1.17985	0.0248783	NO
St6galnac4	81.8222	-1.18187	0.0308237	NO
B4galt5	64.6633	-1.18188	0.0485156	NO
Mrpl54	520.907	-1.1873	0.00037291	NO
Chst11	252.074	-1.19626	0.0130805	NO
Dtnbp1	862.776	-1.21227	0.00210434	NO
Ric3	184.358	-1.215	0.0165924	NO
Etfb	2097.71	-1.22964	0.038083	NO
Adamtsl5	69.1373	-1.25085	0.0451433	NO
Jag2	73.2785	-1.25276	0.0436645	NO
Ppm1m	483.568	-1.26111	0.00141968	NO
AI413582	44.6402	-1.27266	0.0154729	NO
Rassf9	77.5573	-1.27469	0.0486305	NO
Cib2	2453.58	-1.27545	0.000377053	NO
Syp	59.1322	-1.28908	0.00212274	NO
Impa2	796.754	-1.29028	0.00219609	NO
Sdk2	88.8206	-1.29447	0.00269326	NO
Slc25a45	59.4755	-1.29776	0.0258456	NO
Dhcr24	205.877	-1.29852	0.0119638	NO
Npdc1	206.516	-1.30003	0.028483	NO
Pisd-ps1	48.6399	-1.30867	0.0148076	NO
Sfxn5	207.403	-1.31606	0.00161762	NO
Mlycd	541.602	-1.31983	1.09e-05	NO
Pex6	329.541	-1.32279	0.00136913	NO
Endog	381.653	-1.32729	0.000104051	NO
Nubp1	59.6912	-1.32844	0.0449578	NO
Abtb2	59.8381	-1.3364	0.023301	NO
Scand1	66.9172	-1.33898	0.038969	NO
Rgs12	35.5919	-1.34304	0.0438432	NO
Ciapin1	560.256	-1.34447	0.001876	NO
Polr2f	97.6938	-1.35164	0.0279588	NO
mt-Rnr1	214723	-1.35898	0.00226601	NO
Slc41a2	36.005	-1.36404	0.0361817	NO
Lamb3	37.6082	-1.37174	0.0350631	NO
Ctcflos	430.538	-1.37314	0.0401334	NO
Nudt1	50.5816	-1.37611	0.0323719	NO
Sox18	636.103	-1.37829	0.0241344	NO
Alg1	162.508	-1.38282	0.0140158	NO
Apoc1	10528	-1.38458	1.99e-05	NO
Gm7436	121.003	-1.38541	0.00120235	NO
Camk2n2	48.139	-1.42619	0.0330712	NO
Plekhm2	92.902	-1.43329	0.00265248	NO
Sars2	70.1996	-1.43416	0.00552302	NO
Poln	359.467	-1.45374	6.94e-05	NO
Pfkl	1117.69	-1.47187	0.001929	NO
Slc3a2	991.405	-1.47574	0.00210434	NO
Cpsf4	53.1363	-1.48623	0.0017394	NO
Atg4d	294.701	-1.48679	0.00696541	NO
Hey1	90.7117	-1.53481	0.000507505	NO
Mall	96.1378	-1.56581	0.0184118	NO
Nmb	70.5616	-1.56781	0.00272778	NO
Tpgs1	67.1275	-1.57515	0.0023308	NO
1190005I06Rik	83.0588	-1.661	0.0015148	NO
Gm17634	27.2882	-1.66804	0.0171105	NO
Mad1l1	21.1726	-1.67091	0.0266701	NO
Lsm4	207.104	-1.72155	0.00293619	NO
Mapt	400.287	-1.76439	5.22e-06	NO
Hemk1	189.868	-1.78965	0.000475642	NO
Cox8b	12310.3	-1.79841	0.00161348	NO
Smim24	23.8175	-1.82079	0.0373173	NO
Fam57b	167.917	-1.83069	0.0124199	NO
S100b	533.828	-1.83112	0.00387548	NO
Zfp771	59.387	-1.83999	0.0157628	NO
2900089D17Rik	28.9105	-1.87596	0.0222227	NO
Fgfr3	27.1084	-1.88222	0.0264326	NO
Hk1	249.839	-1.91434	6.18e-06	NO
E2f2	43.7689	-1.93673	0.00432732	NO
Cacna1a	93.4758	-2.09466	0.000630515	NO
Ctsz	1932.66	-2.18742	2.05e-09	NO
Zswim5	37.2613	-2.19391	0.00120235	NO
Nnmt	325.43	-2.21897	0.000269335	NO
Cxcl14	135.677	-2.38476	0.00272778	NO
Arhgef37	44.4756	-2.42621	0.0106249	NO
Cars2	294.394	-2.47888	2.93e-12	NO
Camk2b	54.0075	-2.52781	0.00282594	NO
Ifi27l2a	542.733	-2.93541	0.00152063	NO
Gmpr	2700.66	-2.95647	0.00611218	NO
Gm12892	32.6787	-3.40662	5.58e-05	NO
Ckb	179.962	-3.70366	1.56e-13	NO
Sgk2	80.6981	-3.84446	0.0102186	NO
