# Supplementary material for: Brown adipocytes local response to thyroid hormone is required for adaptive thermogenesis in adult male mice
Source: eLife. 2022 Nov 14;11:e81996. doi: 10.7554/eLife.81996 (PMC9683793; doi:10.7554/eLife.81996)
Supplement: Figure 4—source data 2. [file elife-81996-fig4-data2.xlsx]

## Sheet: Feuil1
Classical thermogenic markers	Mitochondrial respiratory chain			Glucose metabolism				Lipid metabolism				Proliferation
	Respiratory chain complex I	Respiratory chain complex III	Respiratory chain complex IV	Glucose transporters	Glycolysis	Citric acid cycle	Lactate metabolism	Lipid transport	LDL/apolipoprotein	Lipolysis/fatty acids oxidation	Lipogenesis
Ppargc1a	Ndufa1	Cyc1	Coa3	Glut3	Hk1	Ogdh	Ldha	Fabp3	ApoC1	Acss1	Acsl5	Ccnd1
	Ndufa3	Uqcc1	Cox4i1	Glut4	Pkm	Idh3a			Lrp10	Pla2g12a	Agpat3
	Ndufa8	Uqcc3	Cox10		Aldoa	Ldha			Ldlrap1	Acadvl	Dhcr24
	Ndufa9	Uqcr10	Cox19		Pfkl					Mgll	Lpin1
	Ndufb2	Uqcr11								Mlycd	Plpp1
	Ndufb4	Uqcrh								Pccb	Acsf3
	Ndufb7
	Ndufb8
	Ndufs7
	Ndufs8
	Ndufv3
